# Supplementary material for: Integrated Multi-Omics and Pathomics Analysis for Prognostic Modeling of Hepatocellular Carcinoma Reveals Oxidative Stress-Driven Immunometabolic Regulatory Mechanisms
Source: Research Square preprint supplement (doi:10.21203/rs.3.rs-7489138/v1), 2025-10-31
Supplement: Supplementary file 1 [file 6126e390eb4f4b95fa9e25cc.xlsx]

## Sheet: Table S1
TableS1. Cross-tissue Transcriptome-wide Association Analysis.
ENSE	test_score	p_value	gene_name	seqnames	start	end	width	strand	source	type	gene_biotype	eff_length
ENSG00000029559	8.08992	0.00021834	IBSP	4	87799554	87812435	12882	+	ensembl_havana	gene	protein_coding	1573
ENSG00000066032	5.86099	0.00275874	CTNNA2	2	79185231	80648861	1463631	+	ensembl_havana	gene	protein_coding	7535
ENSG00000088756	2.81695	0.0439254	ARHGAP28	18	6729716	6915716	186001	+	ensembl_havana	gene	protein_coding	11912
ENSG00000100138	3.13114	0.0462354	SNU13	22	41673933	41690504	16572	-	ensembl_havana	gene	protein_coding	2927
ENSG00000100170	3.80611	0.0312726	SLC5A1	22	32043261	32113029	69769	+	ensembl_havana	gene	protein_coding	5081
ENSG00000100191	2.78155	0.0322349	SLC5A4	22	32218464	32255347	36884	-	ensembl_havana	gene	protein_coding	2048
ENSG00000100216	4.36122	0.0200102	TOMM22	22	38681957	38685421	3465	+	ensembl_havana	gene	protein_coding	2182
ENSG00000100348	4.42526	0.0104266	TXN2	22	36467046	36481640	14595	-	ensembl_havana	gene	protein_coding	1650
ENSG00000100365	4.32717	0.0225638	NCF4	22	36860988	36878017	17030	+	ensembl_havana	gene	protein_coding	2239
ENSG00000109180	2.63484	0.0337221	OCIAD1	4	48805212	48861817	56606	+	ensembl_havana	gene	protein_coding	4714
ENSG00000109320	5.10039	0.00793252	NFKB1	4	102501330	102617302	115973	+	ensembl_havana	gene	protein_coding	15679
ENSG00000109323	4.64655	0.0131495	MANBA	4	102630770	102760994	130225	-	ensembl_havana	gene	protein_coding	11743
ENSG00000109332	5.54626	0.00162774	UBE2D3	4	102794383	102868896	74514	-	ensembl_havana	gene	protein_coding	10044
ENSG00000109339	4.45997	0.00895444	MAPK10	4	85990007	86594625	604619	-	ensembl_havana	gene	protein_coding	42623
ENSG00000109466	6.15126	0.0108284	KLHL2	4	165207561	165323156	115596	+	ensembl_havana	gene	protein_coding	3929
ENSG00000109471	3.38676	0.0487192	IL2	4	122451470	122456725	5256	-	ensembl_havana	gene	protein_coding	1119
ENSG00000109472	3.26327	0.0418848	CPE	4	165361194	165498547	137354	+	ensembl_havana	gene	protein_coding	3119
ENSG00000114923	5.27752	0.00847162	SLC4A3	2	219627394	219641980	14587	+	ensembl_havana	gene	protein_coding	4952
ENSG00000115163	4.78141	0.00926962	CENPA	2	26764289	26801067	36779	+	ensembl_havana	gene	protein_coding	1949
ENSG00000115317	3.66968	0.0309443	HTRA2	2	74529596	74533350	3755	+	ensembl_havana	gene	protein_coding	3405
ENSG00000115523	3.31999	0.0233449	GNLY	2	85685175	85698852	13678	+	ensembl_havana	gene	protein_coding	3047
ENSG00000115525	3.42668	0.0265738	ST3GAL5	2	85837120	85905199	68080	-	ensembl_havana	gene	protein_coding	16300
ENSG00000115548	3.81547	0.0316251	KDM3A	2	86440647	86492716	52070	+	ensembl_havana	gene	protein_coding	13299
ENSG00000115657	6.64107	0.000932856	ABCB6	2	219209772	219218994	9223	-	ensembl_havana	gene	protein_coding	5205
ENSG00000116030	6.10874	0.00382016	SUMO1	2	202206182	202238599	32418	-	ensembl_havana	gene	protein_coding	2153
ENSG00000116062	2.51926	0.0279711	MSH6	2	47695530	47810063	114534	+	ensembl_havana	gene	protein_coding	17722
ENSG00000116117	4.48579	0.0074223	PARD3B	2	204545475	205620162	1074688	+	ensembl_havana	gene	protein_coding	10522
ENSG00000119862	4.48181	0.0116592	LGALSL	2	64453969	64461381	7413	+	ensembl_havana	gene	protein_coding	3933
ENSG00000122085	2.49808	0.0490116	MTERF4	2	241072169	241102332	30164	-	ensembl_havana	gene	protein_coding	9938
ENSG00000124019	3.48425	0.0183062	FAM124B	2	224378698	224402107	23410	-	ensembl_havana	gene	protein_coding	3563
ENSG00000125571	3.9586	0.0171106	IL37	2	112911165	112918882	7718	+	ensembl_havana	gene	protein_coding	931
ENSG00000126545	3.16056	0.0421614	CSN1S1	4	69931068	69946574	15507	+	ensembl_havana	gene	protein_coding	998
ENSG00000127824	5.08333	0.0076927	TUBA4A	2	219249710	219277902	28193	-	ensembl_havana	gene	protein_coding	3698
ENSG00000128652	3.88913	0.0181197	HOXD3	2	176136612	176173102	36491	+	ensembl_havana	gene	protein_coding	3698
ENSG00000132329	51.2545	0.0206446	RAMP1	2	237858893	237912106	53214	+	ensembl_havana	gene	protein_coding	1147
ENSG00000135632	2.27165	0.0453165	SMYD5	2	73214222	73227221	13000	+	ensembl_havana	gene	protein_coding	3364
ENSG00000135925	3.68689	0.0430797	WNT10A	2	218880852	218899581	18730	+	ensembl_havana	gene	protein_coding	2920
ENSG00000137449	3.60129	0.0221624	CPEB2	4	15002481	15070153	67673	+	ensembl_havana	gene	protein_coding	7370
ENSG00000138395	5.26955	0.00452539	CDK15	2	201790461	201895550	105090	+	ensembl_havana	gene	protein_coding	6172
ENSG00000138439	4.84564	0.00537685	FAM117B	2	202634969	202769757	134789	+	ensembl_havana	gene	protein_coding	6205
ENSG00000138442	7.88955	0.000298007	WDR12	2	202874261	203014798	140538	-	ensembl_havana	gene	protein_coding	9619
ENSG00000138449	4.26626	0.0145903	SLC40A1	2	189560590	189583758	23169	-	ensembl_havana	gene	protein_coding	4218
ENSG00000138698	4.46814	0.0169644	RAP1GDS1	4	98261384	98443858	182475	+	ensembl_havana	gene	protein_coding	5421
ENSG00000138771	3.10997	0.037359	SHROOM3	4	76435229	76783253	348025	+	ensembl_havana	gene	protein_coding	13829
ENSG00000138778	2.73947	0.0432045	CENPE	4	103105349	103198445	93097	-	ensembl_havana	gene	protein_coding	9928
ENSG00000138821	3.50936	0.0284316	SLC39A8	4	102251080	102431258	180179	-	ensembl_havana	gene	protein_coding	8482
ENSG00000143947	3.23748	0.0345973	RPS27A	2	55231903	55235853	3951	+	ensembl_havana	gene	protein_coding	2941
ENSG00000144021	3.71691	0.00691359	CIAO1	2	96266159	96274173	8015	+	ensembl_havana	gene	protein_coding	4828
ENSG00000144188	5.39308	0.00357515	TRIM43CP	2	97025981	97031636	5656	-	havana	gene	unprocessed_pseudogene	1028
ENSG00000144362	2.45294	0.0220836	PHOSPHO2	2	169694454	169701708	7255	+	ensembl_havana	gene	protein_coding	1488
ENSG00000144410	4.27071	0.0133114	CPO	2	206939518	206969474	29957	+	ensembl_havana	gene	protein_coding	1245
ENSG00000144485	3.79015	0.0214475	HES6	2	238238267	238240662	2396	-	ensembl_havana	gene	protein_coding	1954
ENSG00000144567	4.58935	0.00943765	RETREG2	2	219176225	219185475	9251	+	ensembl_havana	gene	protein_coding	5675
ENSG00000145247	4.68041	0.0107781	OCIAD2	4	48885019	48906937	21919	-	ensembl_havana	gene	protein_coding	2483
ENSG00000145354	5.84267	0.000710059	CISD2	4	102868974	102892807	23834	+	ensembl_havana	gene	protein_coding	6352
ENSG00000145391	3.77329	0.0250624	SETD7	4	139495941	139606699	110759	-	ensembl_havana	gene	protein_coding	13909
ENSG00000145428	3.50979	0.0290024	RNF175	4	153710160	153760024	49865	-	ensembl_havana	gene	protein_coding	4144
ENSG00000150625	41.4795	0.0495524	GPM6A	4	175632934	176002664	369731	-	ensembl_havana	gene	protein_coding	6553
ENSG00000151247	8.1027	0.000301751	EIF4E	4	98879276	98929133	49858	-	ensembl_havana	gene	protein_coding	4971
ENSG00000151612	4.12875	0.022448	ZNF827	4	145757627	145938823	181197	-	ensembl_havana	gene	protein_coding	19123
ENSG00000151617	4.22516	0.0142527	EDNRA	4	147480917	147544954	64038	+	ensembl_havana	gene	protein_coding	4238
ENSG00000152592	3.34748	0.0332081	DMP1	4	87650280	87664361	14082	+	ensembl_havana	gene	protein_coding	3064
ENSG00000152595	4.24246	0.015726	MEPE	4	87821398	87846814	25417	+	ensembl_havana	gene	protein_coding	2487
ENSG00000154479	2.17147	0.0443938	CFAP210	2	169645425	169694405	48981	-	ensembl_havana	gene	protein_coding	2208
ENSG00000155760	4.355	0.00774068	FZD7	2	202033855	202038441	4587	+	ensembl_havana	gene	protein_coding	4587
ENSG00000158552	6.03102	0.000989661	ZFAND2B	2	219195237	219209651	14415	+	ensembl_havana	gene	protein_coding	3398
ENSG00000161103	4.52429	0.00580464	POM121L15P	22	18846932	18848320	1389	+	havana	gene	transcribed_processed_pseudogene	1389
ENSG00000162972	3.24142	0.0450597	MAIP1	2	199955317	200008540	53224	+	ensembl_havana	gene	protein_coding	1616
ENSG00000163002	3.1866	0.0387836	NUP35	2	183117513	183161680	44168	+	ensembl_havana	gene	protein_coding	4025
ENSG00000163083	4.88473	0.00523103	INHBB	2	120346136	120351803	5668	+	ensembl_havana	gene	protein_coding	3206
ENSG00000163121	4.13462	0.0424578	NEURL3	2	96497646	96508109	10464	-	ensembl_havana	gene	protein_coding	2494
ENSG00000163364	6.36005	0.00249989	LINC01116	2	176611437	176637931	26495	-	havana_tagene	gene	lncRNA	4636
ENSG00000163501	3.85085	0.0085084	IHH	2	219054424	219060921	6498	-	ensembl_havana	gene	protein_coding	2473
ENSG00000163596	6.16548	0.00142202	ICA1L	2	202773150	202871766	98617	-	ensembl_havana	gene	protein_coding	10379
ENSG00000163625	4.80682	0.0163611	WDFY3	4	84668765	84966690	297926	-	ensembl_havana	gene	protein_coding	18000
ENSG00000163629	8.35285	0.000106473	PTPN13	4	86594315	86815171	220857	+	ensembl_havana	gene	protein_coding	9496
ENSG00000163633	4.14726	0.0144552	C4orf36	4	86876205	86892422	16218	-	ensembl_havana	gene	protein_coding	2100
ENSG00000163739	5.34958	0.0161573	CXCL1	4	73869393	73871308	1916	+	ensembl_havana	gene	protein_coding	1362
ENSG00000163795	6.74016	0.000712899	ZNF513	2	27377235	27380790	3556	-	ensembl_havana	gene	protein_coding	2370
ENSG00000163798	3.02833	0.0220843	SLC4A1AP	2	27663426	27695366	31941	+	ensembl_havana	gene	protein_coding	8977
ENSG00000164024	3.1082	0.0313665	METAP1	4	98995659	99062809	67151	+	ensembl_havana	gene	protein_coding	4074
ENSG00000164038	4.65852	0.0139647	SLC9B2	4	103019868	103085829	65962	-	ensembl_havana	gene	protein_coding	8611
ENSG00000164066	51.2208	0.0319929	INTU	4	127623271	127726737	103467	+	ensembl_havana	gene	protein_coding	16041
ENSG00000164162	5.09205	0.0177665	ANAPC10	4	144831908	145098541	266634	-	ensembl_havana	gene	protein_coding	4522
ENSG00000164305	2.86361	0.047391	CASP3	4	184627696	184650062	22367	-	ensembl_havana	gene	protein_coding	7650
ENSG00000164342	4.24103	0.0105423	TLR3	4	186068911	186088073	19163	+	ensembl_havana	gene	protein_coding	7496
ENSG00000168427	4.94809	0.00468111	KLHL30	2	238138668	238152947	14280	+	ensembl_havana	gene	protein_coding	3780
ENSG00000168702	4.97936	0.00700742	LRP1B	2	140231423	142131016	1899594	-	havana	gene	protein_coding	16355
ENSG00000168785	3.24228	0.046584	TSPAN5	4	98470367	98658611	188245	-	ensembl_havana	gene	protein_coding	7412
ENSG00000168874	3.73747	0.0273874	ATOH8	2	85751344	85791383	40040	+	ensembl_havana	gene	protein_coding	9296
ENSG00000170144	6.81629	0.00211626	HNRNPA3	2	177212694	177223959	11266	+	ensembl_havana	gene	protein_coding	6541
ENSG00000170509	10.9967	6.97213e-06	HSD17B13	4	87303789	87322886	19098	-	ensembl_havana	gene	protein_coding	2377
ENSG00000171557	5.52242	0.0171584	FGG	4	154604134	154612967	8834	-	ensembl_havana	gene	protein_coding	3600
ENSG00000172493	13.8738	4.61941e-07	AFF1	4	86935002	87141039	206038	+	ensembl_havana	gene	protein_coding	10953
ENSG00000172799	3.37773	0.0290696	ZBTB8OSP2	2	231433923	231434426	504	-	havana	gene	processed_pseudogene	504
ENSG00000172955	9.14508	4.58446e-05	ADH6	4	99202638	99219537	16900	-	ensembl_havana	gene	protein_coding	4401
ENSG00000173166	4.2128	0.0205978	RAPH1	2	203394345	203535335	140991	-	ensembl_havana	gene	protein_coding	11622
ENSG00000177855	4.65025	0.0209056	CACYBPP2	2	183607442	183608119	678	-	havana	gene	processed_pseudogene	678
ENSG00000181378	4.26946	0.0209369	CFAP65	2	219002846	219041527	38682	-	ensembl_havana	gene	protein_coding	10519
ENSG00000183066	2.26239	0.0370414	WBP2NL	22	41998725	42058456	59732	+	ensembl_havana	gene	protein_coding	6180
ENSG00000184182	3.97859	0.00755934	UBE2F	2	237966827	238042782	75956	+	ensembl_havana	gene	protein_coding	4238
ENSG00000184305	3.95511	0.0224683	CCSER1	4	90127394	91605295	1477902	+	ensembl_havana	gene	protein_coding	13997
ENSG00000185022	3.32863	0.0409158	MAFF	22	38200767	38216507	15741	+	ensembl_havana	gene	protein_coding	5611
ENSG00000187758	2.33453	0.0479368	ADH1A	4	99276369	99291003	14635	-	ensembl_havana	gene	protein_coding	2231
ENSG00000188383	3.68785	0.0392273	GPAT2P2	2	97081098	97083249	2152	+	havana	gene	unprocessed_pseudogene	863
ENSG00000188886	3.43849	0.0396784	ASTL	2	96122818	96138502	15685	-	ensembl_havana	gene	protein_coding	2752
ENSG00000196604	3.8254	0.0366811	POTEF	2	130073535	130129222	55688	-	ensembl_havana	gene	protein_coding	4704
ENSG00000196758	2.37974	0.017325	LINC02991	2	239578301	239586094	7794	+	havana	gene	lncRNA	3700
ENSG00000197641	3.17493	0.0423153	SERPINB13	18	63586989	63604639	17651	+	ensembl_havana	gene	protein_coding	4534
ENSG00000197894	10.79	1.13656e-05	ADH5	4	99070978	99088801	17824	-	ensembl_havana	gene	protein_coding	4866
ENSG00000198099	8.95592	5.33877e-05	ADH4	4	99123657	99157792	34136	-	ensembl_havana	gene	protein_coding	2453
ENSG00000198189	5.22356	0.00162489	HSD17B11	4	87336515	87391188	54674	-	ensembl_havana	gene	protein_coding	2332
ENSG00000198792	2.8866	0.0220267	TMEM184B	22	38219291	38273010	53720	-	ensembl_havana	gene	protein_coding	7056
ENSG00000198925	3.41789	0.0359561	ATG9A	2	219219380	219229717	10338	-	ensembl_havana	gene	protein_coding	4724
ENSG00000199530	2.30489	0.0211729	Y_RNA	4	82944738	82944845	108	-	ensembl	gene	misc_RNA	108
ENSG00000203327	4.29204	0.00738698		2	55214387	55216126	1740	-	havana	gene	lncRNA	916
ENSG00000204196	3.9926	0.02418	RPL12P16	2	203190780	203191277	498	+	havana	gene	transcribed_processed_pseudogene	498
ENSG00000204685	63.4172	0.0146217	STARD7-AS1	2	96208389	96243353	34965	+	ensembl_havana	gene	lncRNA	4733
ENSG00000205111	3.16722	0.0467506	CDKL4	2	39168045	39243983	75939	-	ensembl_havana	gene	protein_coding	2959
ENSG00000205334	5.71315	0.00205533	LINC01460	2	27705786	27716738	10953	-	havana	gene	lncRNA	3262
ENSG00000211653	2.98226	0.0481934	IGLV1-40	22	22409766	22410282	517	+	havana	gene	IG_V_gene	407
ENSG00000213480	2.56972	0.010178	KIAA1191P1	4	121369433	121370345	913	-	havana	gene	processed_pseudogene	913
ENSG00000213759	5.85216	0.00169017	UGT2B11	4	69199951	69214748	14798	-	havana	gene	protein_coding	2357
ENSG00000213901	4.73262	0.00756243	SLC23A3	2	219161465	219170095	8631	-	ensembl_havana	gene	protein_coding	3601
ENSG00000214367	3.65574	0.0250468	HAUS3	4	2227464	2242133	14670	-	ensembl_havana	gene	protein_coding	7036
ENSG00000214886	2.35062	0.0187422	FAM177A1P1	4	98955982	98956767	786	+	havana	gene	processed_pseudogene	473
ENSG00000215333	-2.04855	0.0405057	KRT18P23	22	44566965	44568247	1283	+	havana	gene	processed_pseudogene	1283
ENSG00000215512	-2.11765	0.0342046		18	15307663	15330282	22620	-	havana	gene	transcribed_unprocessed_pseudogene	1181
ENSG00000215544	-2.12895	0.0332585	BCRP7	22	18855621	18858640	3020	-	havana	gene	unprocessed_pseudogene	544
ENSG00000217643	4.48035	0.00548359	PTGES3P2	2	25822469	25822950	482	+	havana	gene	processed_pseudogene	482
ENSG00000223349	2.48755	0.0330649	KLF2P3	2	130692243	130693770	1528	-	havana	gene	processed_pseudogene	1087
ENSG00000223522	2.43847	0.0281461		2	28307063	28310560	3498	-	havana_tagene	gene	lncRNA	3201
ENSG00000223873	4.81474	0.0109941	SAP18P2	2	181694442	181694900	459	+	havana	gene	processed_pseudogene	459
ENSG00000224159	-2.09333	0.0363194	HMGB1P9	2	218200434	218201388	955	+	havana	gene	processed_pseudogene	646
ENSG00000224346	2.26876	0.0232829	BICD1P1	2	200844240	200845461	1222	+	havana	gene	processed_pseudogene	1222
ENSG00000224675	3.52902	0.0360299	GALNT13-AS1	2	154435853	154457438	21586	-	havana	gene	lncRNA	2362
ENSG00000224791	6.15558	0.00153453	KRT18P39	2	203764295	203765593	1299	-	havana	gene	processed_pseudogene	1299
ENSG00000224826	2.36722	0.0179222	USP21P1	2	224169664	224171537	1874	+	havana	gene	processed_pseudogene	1874
ENSG00000225064	-2.14319	0.0320981	LINC01802	2	207260445	207270690	10246	+	havana	gene	lncRNA	523
ENSG00000225284	2.25258	0.0242854		2	38861720	38863133	1414	+	havana	gene	lncRNA	550
ENSG00000225378	9.49966	0.0164743		2	26671254	26674464	3211	-	havana	gene	lncRNA	567
ENSG00000225476	3.67463	0.0102646	MTCO3P5	2	143098898	143099933	1036	-	havana	gene	processed_pseudogene	714
ENSG00000225720	12.5573	0.00711309		22	39091586	39092110	525	+	havana	gene	transcribed_unprocessed_pseudogene	314
ENSG00000226072	-2.40994	0.0159549		2	169658132	169661357	3226	-	havana	gene	processed_pseudogene	1261
ENSG00000226186	4.17302	0.0279645	ELOCP21	2	70955899	70956234	336	-	havana	gene	processed_pseudogene	336
ENSG00000226506	2.11677	0.0342797		2	7886767	7899725	12959	-	havana_tagene	gene	lncRNA	882
ENSG00000226655	-2.31461	0.0206344		4	123744923	123745673	751	-	havana	gene	lncRNA	477
ENSG00000226833	7.24964	0.00101706	PPP1CB-DT	2	28707511	28751722	44212	-	havana	gene	lncRNA	6440
ENSG00000227028	5.56739	0.0113874	SLC8A1-AS1	2	39786453	40255209	468757	+	havana	gene	lncRNA	8475
ENSG00000227055	-2.0815	0.0373878		2	159812234	159814009	1776	-	havana	gene	processed_pseudogene	251
ENSG00000227348	3.13267	0.0467731	MTND5P25	2	201212283	201213081	799	-	havana	gene	unprocessed_pseudogene	799
ENSG00000227557	-3.40988	0.000649917	MTND3P9	2	143098484	143098829	346	-	havana	gene	processed_pseudogene	346
ENSG00000227744	3.61481	0.0379946	LINC01940	2	238919302	238926269	6968	-	havana	gene	lncRNA	3489
ENSG00000227799	4.65643	0.0100438	CDPF1P1	2	55224280	55225908	1629	+	havana	gene	processed_pseudogene	1434
ENSG00000227890	-2.84143	0.00449115	PSMA2P3	2	202179297	202179971	675	+	havana	gene	processed_pseudogene	675
ENSG00000227902	2.01672	0.0437242	NA	NA	NA	NA	NA	NA	NA	NA	NA	NA
ENSG00000227938	2.94021	0.0311013		2	28448167	28450184	2018	-	havana	gene	lncRNA	849
ENSG00000228206	4.28891	0.0149745	NA	NA	NA	NA	NA	NA	NA	NA	NA	NA
ENSG00000228272	2.19559	0.0281216		2	84315108	84350774	35667	+	havana	gene	lncRNA	646
ENSG00000228513	3.52116	0.0311568		2	203061314	203062403	1090	-	havana	gene	processed_pseudogene	1090
ENSG00000228563	2.65057	0.0312251		2	31526942	31563464	36523	+	havana	gene	lncRNA	646
ENSG00000228763	4.60395	0.00924084	LIMS1-AS1	2	108676795	108678601	1807	-	havana	gene	lncRNA	477
ENSG00000228909	3.33213	0.000861852	LINC01803	2	219903900	219904923	1024	-	havana_tagene	gene	lncRNA	798
ENSG00000229536	3.07634	0.0434891	LINC02572	2	129825126	129877664	52539	-	havana	gene	lncRNA	4131
ENSG00000229565	-2.969	0.00298767	LINC02264	4	117834145	117869960	35816	+	havana	gene	lncRNA	931
ENSG00000229692	5.02367	0.00850829	SOS1-IT1	2	38992279	38993857	1579	-	havana	gene	lncRNA	1254
ENSG00000229798	2.04759	0.0406003	KRT18P26	2	74306728	74308008	1281	-	havana	gene	processed_pseudogene	1281
ENSG00000230069	4.40367	0.00337774	LRRC37A15P	4	102727274	102730721	3448	-	havana	gene	processed_pseudogene	1355
ENSG00000230452	2.79575	0.0313148	LINC01381	2	25204313	25209202	4890	+	havana	gene	lncRNA	466
ENSG00000230747	3.90565	0.0230014		2	96307263	96321731	14469	-	havana	gene	lncRNA	740
ENSG00000231584	3.45114	0.0403276	FAHD2CP	2	96013730	96021608	7879	+	havana	gene	transcribed_unprocessed_pseudogene	900
ENSG00000233799	2.53453	0.0412392		4	764487	765074	588	-	havana	gene	lncRNA	286
ENSG00000237136	-2.20067	0.0277597	C4orf51	4	145680146	145771032	90887	+	ensembl_havana	gene	protein_coding	1094
ENSG00000239040	3.37893	0.0409712	Y_RNA	4	55412636	55412738	103	+	ensembl	gene	misc_RNA	103
ENSG00000241923	6.18055	0.0127674	RPL14P3	4	140366240	140366861	622	-	havana	gene	processed_pseudogene	622
ENSG00000242102	2.42897	0.0441441	RN7SL152P	4	140577925	140578222	298	+	ensembl	gene	misc_RNA	298
ENSG00000242175	-2.01157	0.0442656	RN7SL127P	4	78898855	78899154	300	+	ensembl	gene	misc_RNA	300
ENSG00000244512	3.01474	0.002572	RN7SL28P	4	184278936	184279233	298	+	ensembl	gene	misc_RNA	298
ENSG00000246090	5.91402	0.00110629		4	99088805	99301356	212552	+	havana	gene	lncRNA	8216
ENSG00000246560	4.83891	0.00237046	UBE2D3-AS1	4	102827611	102844099	16489	+	havana	gene	lncRNA	1383
ENSG00000247624	4.87614	0.00642689	CPEB2-DT	4	14909961	15002045	92085	-	havana	gene	lncRNA	3089
ENSG00000248196	8.76901	0.000133373		4	87166844	87167734	891	+	havana	gene	processed_pseudogene	891
ENSG00000248213	3.04598	0.0411374	CICP16	4	118635970	118638782	2813	-	havana	gene	processed_pseudogene	2813
ENSG00000248319	2.99619	0.043561	LINC02275	4	169917761	169975953	58193	-	havana_tagene	gene	lncRNA	6440
ENSG00000248343	3.00773	0.023585		4	21697450	21719026	21577	+	havana	gene	lncRNA	948
ENSG00000248360	3.83631	0.0189719	LINC00504	4	14470465	14888169	417705	-	havana	gene	lncRNA	5095
ENSG00000248388	2.30944	0.0209189	HAFML	4	176669621	176706145	36525	+	havana	gene	lncRNA	383
ENSG00000248583	5.69958	0.00503358		4	49486926	49489554	2629	-	havana	gene	unprocessed_pseudogene	670
ENSG00000248713	10.4903	2.06481e-05	C4orf54	4	99636529	99657828	21300	-	havana	gene	protein_coding	10451
ENSG00000248872	-2.00359	0.0451138	LINC02431	4	171040564	171059163	18600	+	havana	gene	lncRNA	3670
ENSG00000248971	2.84469	0.0202617	KRT8P46	4	102728746	102730171	1426	-	havana	gene	processed_pseudogene	1426
ENSG00000249173	5.82795	0.00341421	LINC01093	4	184892858	184899553	6696	-	havana_tagene	gene	lncRNA	3689
ENSG00000249858	3.53276	0.0160988	SNX5P1	4	76344550	76345590	1041	+	havana	gene	processed_pseudogene	1041
ENSG00000250147	2.19029	0.028503	MORF4L2P1	4	54086926	54087783	858	+	havana	gene	processed_pseudogene	858
ENSG00000250195	2.12726	0.0333982		4	138819954	139012646	192693	-	havana	gene	lncRNA	664
ENSG00000255112	3.62666	0.0355701	CHMP1B	18	11851413	11854444	3032	+	havana	gene	protein_coding	3032
ENSG00000261520	3.49849	0.0323603	DLGAP1-AS5	18	4264602	4295405	30804	+	havana	gene	lncRNA	2878
ENSG00000263393	4.58087	0.0112629		18	32122400	32124478	2079	-	havana	gene	lncRNA	553
ENSG00000263733	2.46529	0.0136901		18	71225704	71226721	1018	+	havana	gene	processed_pseudogene	1018
ENSG00000263895	-2.41433	0.0157641		18	49431744	49447420	15677	-	havana	gene	lncRNA	332
ENSG00000263970	-3.02591	0.00247888		18	8406761	8406953	193	-	havana	gene	lncRNA	193
ENSG00000264000	5.2596	0.0024822		18	5567130	5570942	3813	+	havana	gene	lncRNA	456
ENSG00000264595	1.97355	0.0484332		18	76227990	76233387	5398	-	havana	gene	lncRNA	594
ENSG00000264790	3.13417	0.0386277		18	27343252	27346110	2859	+	havana	gene	lncRNA	922
ENSG00000265091	3.40344	0.0288356		18	5232876	5238526	5651	-	havana	gene	lncRNA	977
ENSG00000265279	-2.81843	0.00482592	CLUHP6	18	32196026	32196966	941	-	havana	gene	processed_pseudogene	941
ENSG00000265552	2.76262	0.00573388		18	25055600	25056760	1161	+	havana	gene	lncRNA	663
ENSG00000266258	3.01575	0.025401	LINC01909	18	70335439	70352459	17021	+	havana	gene	lncRNA	1040

## Sheet: Table S2
TableS2. Oxidative stress-related genes.
Gene Symbol	Description	Category	Uniprot ID	Gifts	GC Id	Relevance score	GeneCards Link
RYR2	Ryanodine Receptor 2	Protein Coding	Q92736	53	GC01P237042	122.118	https://www.genecards.org/cgi-bin/carddisp.pl?gene=RYR2
NOS3	Nitric Oxide Synthase 3	Protein Coding	P29474	56	GC07P152342	73.7417	https://www.genecards.org/cgi-bin/carddisp.pl?gene=NOS3
NOS2	Nitric Oxide Synthase 2	Protein Coding	P35228	56	GC17M027756	68.0714	https://www.genecards.org/cgi-bin/carddisp.pl?gene=NOS2
ELAC2	ElaC Ribonuclease Z 2	Protein Coding	Q9BQ52	49	GC17M012991	63.2232	https://www.genecards.org/cgi-bin/carddisp.pl?gene=ELAC2
TRDN	Triadin	Protein Coding	Q13061	49	GC06M123198	59.7689	https://www.genecards.org/cgi-bin/carddisp.pl?gene=TRDN
CARS2	Cysteinyl-TRNA Synthetase 2, Mitochondrial	Protein Coding	Q9HA77	48	GC13M110641	59.2253	https://www.genecards.org/cgi-bin/carddisp.pl?gene=CARS2
SOD1	Superoxide Dismutase 1	Protein Coding	P00441	60	GC21P031659	55.0902	https://www.genecards.org/cgi-bin/carddisp.pl?gene=SOD1
CPT2	Carnitine Palmitoyltransferase 2	Protein Coding	P23786	56	GC01P053196	54.4445	https://www.genecards.org/cgi-bin/carddisp.pl?gene=CPT2
CAT	Catalase	Protein Coding	P04040	58	GC11P034460	54.2388	https://www.genecards.org/cgi-bin/carddisp.pl?gene=CAT
NOS1	Nitric Oxide Synthase 1	Protein Coding	P29475	56	GC12M117208	53.3912	https://www.genecards.org/cgi-bin/carddisp.pl?gene=NOS1
FARS2	Phenylalanyl-TRNA Synthetase 2, Mitochondrial	Protein Coding	O95363	50	GC06P005395	52.5877	https://www.genecards.org/cgi-bin/carddisp.pl?gene=FARS2
MTO1	Mitochondrial TRNA Translation Optimization 1	Protein Coding	Q9Y2Z2	49	GC06P073461	48.9247	https://www.genecards.org/cgi-bin/carddisp.pl?gene=MTO1
AIFM1	Apoptosis Inducing Factor Mitochondria Associated 1	Protein Coding	O95831	57	GC0XM130129	48.7774	https://www.genecards.org/cgi-bin/carddisp.pl?gene=AIFM1
GFM1	G Elongation Factor Mitochondrial 1	Protein Coding	Q96RP9	50	GC03P158644	48.4157	https://www.genecards.org/cgi-bin/carddisp.pl?gene=GFM1
CASQ2	Calsequestrin 2	Protein Coding	O14958	52	GC01M115700	48.0624	https://www.genecards.org/cgi-bin/carddisp.pl?gene=CASQ2
TP53	Tumor Protein P53	Protein Coding	P04637	60	GC17M007661	46.1065	https://www.genecards.org/cgi-bin/carddisp.pl?gene=TP53
NFE2L2	NFE2 Like BZIP Transcription Factor 2	Protein Coding	Q16236	58	GC02M177227	45.7873	https://www.genecards.org/cgi-bin/carddisp.pl?gene=NFE2L2
HMOX1	Heme Oxygenase 1	Protein Coding	P09601	59	GC22P035380	44.8118	https://www.genecards.org/cgi-bin/carddisp.pl?gene=HMOX1
SOD2	Superoxide Dismutase 2	Protein Coding	P04179	54	GC06M159669	41.5094	https://www.genecards.org/cgi-bin/carddisp.pl?gene=SOD2
TNF	Tumor Necrosis Factor	Protein Coding	P01375	58	GC06P104098	41.4688	https://www.genecards.org/cgi-bin/carddisp.pl?gene=TNF
AARS2	Alanyl-TRNA Synthetase 2, Mitochondrial	Protein Coding	Q5JTZ9	49	GC06M081192	40.3053	https://www.genecards.org/cgi-bin/carddisp.pl?gene=AARS2
POLR1C	RNA Polymerase I And III Subunit C	Protein Coding	O15160	51	GC06P104306	38.713	https://www.genecards.org/cgi-bin/carddisp.pl?gene=POLR1C
MAPK14	Mitogen-Activated Protein Kinase 14	Protein Coding	Q16539	57	GC06P104232	38.2145	https://www.genecards.org/cgi-bin/carddisp.pl?gene=MAPK14
NARS2	Asparaginyl-TRNA Synthetase 2, Mitochondrial	Protein Coding	Q96I59	50	GC11M078435	37.893	https://www.genecards.org/cgi-bin/carddisp.pl?gene=NARS2
MAPK8	Mitogen-Activated Protein Kinase 8	Protein Coding	P45983	56	GC10P048306	37.6585	https://www.genecards.org/cgi-bin/carddisp.pl?gene=MAPK8
GSR	Glutathione-Disulfide Reductase	Protein Coding	P00390	56	GC08M030678	37.3716	https://www.genecards.org/cgi-bin/carddisp.pl?gene=GSR
OXSR1	Oxidative Stress Responsive Kinase 1	Protein Coding	O95747	48	GC03P038195	37.242	https://www.genecards.org/cgi-bin/carddisp.pl?gene=OXSR1
MTRFR	Mitochondrial Translation Release Factor In Rescue	Protein Coding	Q9H3J6	41	GC12P128264	35.238	https://www.genecards.org/cgi-bin/carddisp.pl?gene=MTRFR
XDH	Xanthine Dehydrogenase	Protein Coding	P47989	54	GC02M031334	35.0128	https://www.genecards.org/cgi-bin/carddisp.pl?gene=XDH
TUFM	Tu Translation Elongation Factor, Mitochondrial	Protein Coding	P49411	51	GC16M040701	34.6442	https://www.genecards.org/cgi-bin/carddisp.pl?gene=TUFM
TXN	Thioredoxin	Protein Coding	P10599	52	GC09M110243	34.2271	https://www.genecards.org/cgi-bin/carddisp.pl?gene=TXN
TSFM	Ts Translation Elongation Factor, Mitochondrial	Protein Coding	P43897	49	GC12P057782	33.9658	https://www.genecards.org/cgi-bin/carddisp.pl?gene=TSFM
MPO	Myeloperoxidase	Protein Coding	P05164	60	GC17M058269	33.8845	https://www.genecards.org/cgi-bin/carddisp.pl?gene=MPO
OSGIN1	Oxidative Stress Induced Growth Inhibitor 1	Protein Coding	Q9UJX0	41	GC16P083934	33.8644	https://www.genecards.org/cgi-bin/carddisp.pl?gene=OSGIN1
VARS2	Valyl-TRNA Synthetase 2, Mitochondrial	Protein Coding	Q5ST30	48	GC06P104083	33.6613	https://www.genecards.org/cgi-bin/carddisp.pl?gene=VARS2
PNPT1	Polyribonucleotide Nucleotidyltransferase 1	Protein Coding	Q8TCS8	50	GC02M055634	32.7752	https://www.genecards.org/cgi-bin/carddisp.pl?gene=PNPT1
MAPK1	Mitogen-Activated Protein Kinase 1	Protein Coding	P28482	60	GC22M021759	32.6575	https://www.genecards.org/cgi-bin/carddisp.pl?gene=MAPK1
EARS2	Glutamyl-TRNA Synthetase 2, Mitochondrial	Protein Coding	Q5JPH6	49	GC16M024315	32.1335	https://www.genecards.org/cgi-bin/carddisp.pl?gene=EARS2
IL6	Interleukin 6	Protein Coding	P05231	58	GC07P022725	32.062	https://www.genecards.org/cgi-bin/carddisp.pl?gene=IL6
OSER1	Oxidative Stress Responsive Serine Rich 1	Protein Coding	Q9NX31	39	GC20M044195	31.133	https://www.genecards.org/cgi-bin/carddisp.pl?gene=OSER1
G6PD	Glucose-6-Phosphate Dehydrogenase	Protein Coding	P11413	57	GC0XM154578	30.2007	https://www.genecards.org/cgi-bin/carddisp.pl?gene=G6PD
OLR1	Oxidized Low Density Lipoprotein Receptor 1	Protein Coding	P78380	49	GC12M024903	29.8913	https://www.genecards.org/cgi-bin/carddisp.pl?gene=OLR1
PARK7	Parkinsonism Associated Deglycase	Protein Coding	Q99497	54	GC01P008210	29.8199	https://www.genecards.org/cgi-bin/carddisp.pl?gene=PARK7
SIRT1	Sirtuin 1	Protein Coding	Q96EB6	56	GC10P067884	29.7503	https://www.genecards.org/cgi-bin/carddisp.pl?gene=SIRT1
CYCS	Cytochrome C, Somatic	Protein Coding	P99999	55	GC07M025118	29.4977	https://www.genecards.org/cgi-bin/carddisp.pl?gene=CYCS
TXN2	Thioredoxin 2	Protein Coding	Q99757	50	GC22M036467	29.1971	https://www.genecards.org/cgi-bin/carddisp.pl?gene=TXN2
CASP3	Caspase 3	Protein Coding	P42574	56	GC04M184627	29.1807	https://www.genecards.org/cgi-bin/carddisp.pl?gene=CASP3
MTFMT	Mitochondrial Methionyl-TRNA Formyltransferase	Protein Coding	Q96DP5	47	GC15M065001	28.9179	https://www.genecards.org/cgi-bin/carddisp.pl?gene=MTFMT
OSGIN2	Oxidative Stress Induced Growth Inhibitor Family Member 2	Protein Coding	Q9Y236	37	GC08P089901	28.4615	https://www.genecards.org/cgi-bin/carddisp.pl?gene=OSGIN2
IL1B	Interleukin 1 Beta	Protein Coding	P01584	54	GC02M112829	27.8622	https://www.genecards.org/cgi-bin/carddisp.pl?gene=IL1B
GPX1	Glutathione Peroxidase 1	Protein Coding	P07203	52	GC03M052428	27.7405	https://www.genecards.org/cgi-bin/carddisp.pl?gene=GPX1
NQO1	NAD(P)H Quinone Dehydrogenase 1	Protein Coding	P15559	54	GC16M069706	27.2926	https://www.genecards.org/cgi-bin/carddisp.pl?gene=NQO1
PON1	Paraoxonase 1	Protein Coding	P27169	54	GC07M095297	26.3582	https://www.genecards.org/cgi-bin/carddisp.pl?gene=PON1
HSPA5	Heat Shock Protein Family A (Hsp70) Member 5	Protein Coding	P11021	56	GC09M125234	26.2938	https://www.genecards.org/cgi-bin/carddisp.pl?gene=HSPA5
MAP3K5	Mitogen-Activated Protein Kinase Kinase Kinase 5	Protein Coding	Q99683	55	GC06M136557	26.0573	https://www.genecards.org/cgi-bin/carddisp.pl?gene=MAP3K5
CALM1	Calmodulin 1	Protein Coding	P0DP23	53	GC14P090396	25.8867	https://www.genecards.org/cgi-bin/carddisp.pl?gene=CALM1
APP	Amyloid Beta Precursor Protein	Protein Coding	P05067	58	GC21M025880	25.6047	https://www.genecards.org/cgi-bin/carddisp.pl?gene=APP
JUN	Jun Proto-Oncogene, AP-1 Transcription Factor Subunit	Protein Coding	P05412	56	GC01M058780	25.6028	https://www.genecards.org/cgi-bin/carddisp.pl?gene=JUN
CXCL8	C-X-C Motif Chemokine Ligand 8	Protein Coding	P10145	50	GC04P073740	25.5801	https://www.genecards.org/cgi-bin/carddisp.pl?gene=CXCL8
INS	Insulin	Protein Coding	P01308	54	GC11M002159	25.4041	https://www.genecards.org/cgi-bin/carddisp.pl?gene=INS
ALB	Albumin	Protein Coding	P02768	56	GC04P073397	25.3777	https://www.genecards.org/cgi-bin/carddisp.pl?gene=ALB
CYBA	Cytochrome B-245 Alpha Chain	Protein Coding	P13498	54	GC16M088643	25.242	https://www.genecards.org/cgi-bin/carddisp.pl?gene=CYBA
GTPBP3	GTP Binding Protein 3, Mitochondrial	Protein Coding	Q969Y2	48	GC19P082827	25.0846	https://www.genecards.org/cgi-bin/carddisp.pl?gene=GTPBP3
PTGS2	Prostaglandin-Endoperoxide Synthase 2	Protein Coding	P35354	56	GC01M186671	24.8671	https://www.genecards.org/cgi-bin/carddisp.pl?gene=PTGS2
FASTKD2	FAST Kinase Domains 2	Protein Coding	Q9NYY8	45	GC02P206766	24.8476	https://www.genecards.org/cgi-bin/carddisp.pl?gene=FASTKD2
ACADVL	Acyl-CoA Dehydrogenase Very Long Chain	Protein Coding	P49748	52	GC17P012975	24.7667	https://www.genecards.org/cgi-bin/carddisp.pl?gene=ACADVL
GFM2	GTP Dependent Ribosome Recycling Factor Mitochondrial 2	Protein Coding	Q969S9	47	GC05M074721	24.7109	https://www.genecards.org/cgi-bin/carddisp.pl?gene=GFM2
FOXO3	Forkhead Box O3	Protein Coding	O43524	54	GC06P108559	24.6508	https://www.genecards.org/cgi-bin/carddisp.pl?gene=FOXO3
PRDX2	Peroxiredoxin 2	Protein Coding	P32119	53	GC19M012796	24.5169	https://www.genecards.org/cgi-bin/carddisp.pl?gene=PRDX2
DDIT3	DNA Damage Inducible Transcript 3	Protein Coding	P35638	53	GC12M057516	24.2694	https://www.genecards.org/cgi-bin/carddisp.pl?gene=DDIT3
PARP1	Poly(ADP-Ribose) Polymerase 1	Protein Coding	P09874	57	GC01M226360	24.2104	https://www.genecards.org/cgi-bin/carddisp.pl?gene=PARP1
CRP	C-Reactive Protein	Protein Coding	P02741	52	GC01M159732	24.1961	https://www.genecards.org/cgi-bin/carddisp.pl?gene=CRP
OGG1	8-Oxoguanine DNA Glycosylase	Protein Coding	O15527	54	GC03P014579	24.1866	https://www.genecards.org/cgi-bin/carddisp.pl?gene=OGG1
GSTM1	Glutathione S-Transferase Mu 1	Protein Coding	P09488	49	GC01P109687	24.1462	https://www.genecards.org/cgi-bin/carddisp.pl?gene=GSTM1
ATF4	Activating Transcription Factor 4	Protein Coding	P18848	53	GC22P039519	24.1178	https://www.genecards.org/cgi-bin/carddisp.pl?gene=ATF4
TARS2	Threonyl-TRNA Synthetase 2, Mitochondrial	Protein Coding	Q9BW92	49	GC01P154278	24.0144	https://www.genecards.org/cgi-bin/carddisp.pl?gene=TARS2
GSTP1	Glutathione S-Transferase Pi 1	Protein Coding	P09211	57	GC11P067583	23.7681	https://www.genecards.org/cgi-bin/carddisp.pl?gene=GSTP1
MRPL44	Mitochondrial Ribosomal Protein L44	Protein Coding	Q9H9J2	48	GC02P223957	23.7309	https://www.genecards.org/cgi-bin/carddisp.pl?gene=MRPL44
SLC6A4	Solute Carrier Family 6 Member 4	Protein Coding	P31645	54	GC17M030194	23.5286	https://www.genecards.org/cgi-bin/carddisp.pl?gene=SLC6A4
HADHA	Hydroxyacyl-CoA Dehydrogenase Trifunctional Multienzyme Complex Subunit Alpha	Protein Coding	P40939	53	GC02M026190	23.4375	https://www.genecards.org/cgi-bin/carddisp.pl?gene=HADHA
NOS1AP	Nitric Oxide Synthase 1 Adaptor Protein	Protein Coding	O75052	46	GC01P162069	23.4139	https://www.genecards.org/cgi-bin/carddisp.pl?gene=NOS1AP
FOXO1	Forkhead Box O1	Protein Coding	Q12778	58	GC13M040555	23.3481	https://www.genecards.org/cgi-bin/carddisp.pl?gene=FOXO1
XBP1	X-Box Binding Protein 1	Protein Coding	P17861	52	GC22M028794	23.3101	https://www.genecards.org/cgi-bin/carddisp.pl?gene=XBP1
AKT1	AKT Serine/Threonine Kinase 1	Protein Coding	P31749	60	GC14M104769	23.2616	https://www.genecards.org/cgi-bin/carddisp.pl?gene=AKT1
KEAP1	Kelch Like ECH Associated Protein 1	Protein Coding	Q14145	56	GC19M010486	23.2386	https://www.genecards.org/cgi-bin/carddisp.pl?gene=KEAP1
PRKN	Parkin RBR E3 Ubiquitin Protein Ligase	Protein Coding	O60260	56	GC06M161348	23.1465	https://www.genecards.org/cgi-bin/carddisp.pl?gene=PRKN
CRH	Corticotropin Releasing Hormone	Protein Coding	P06850	50	GC08M066176	23.1084	https://www.genecards.org/cgi-bin/carddisp.pl?gene=CRH
G3BP1	G3BP Stress Granule Assembly Factor 1	Protein Coding	Q13283	46	GC05P151771	23.0792	https://www.genecards.org/cgi-bin/carddisp.pl?gene=G3BP1
MAPK10	Mitogen-Activated Protein Kinase 10	Protein Coding	P53779	56	GC04M085990	23.0457	https://www.genecards.org/cgi-bin/carddisp.pl?gene=MAPK10
BCL2	BCL2 Apoptosis Regulator	Protein Coding	P10415	58	GC18M063123	22.9344	https://www.genecards.org/cgi-bin/carddisp.pl?gene=BCL2
HSPB1	Heat Shock Protein Family B (Small) Member 1	Protein Coding	P04792	58	GC07P076302	22.8721	https://www.genecards.org/cgi-bin/carddisp.pl?gene=HSPB1
HSF1	Heat Shock Transcription Factor 1	Protein Coding	Q00613	54	GC08P144291	22.7622	https://www.genecards.org/cgi-bin/carddisp.pl?gene=HSF1
EIF2AK3	Eukaryotic Translation Initiation Factor 2 Alpha Kinase 3	Protein Coding	Q9NZJ5	56	GC02M088556	22.6412	https://www.genecards.org/cgi-bin/carddisp.pl?gene=EIF2AK3
HADHB	Hydroxyacyl-CoA Dehydrogenase Trifunctional Multienzyme Complex Subunit Beta	Protein Coding	P55084	53	GC02P026243	22.6028	https://www.genecards.org/cgi-bin/carddisp.pl?gene=HADHB
HSP90AA1	Heat Shock Protein 90 Alpha Family Class A Member 1	Protein Coding	P07900	58	GC14M102080	22.5228	https://www.genecards.org/cgi-bin/carddisp.pl?gene=HSP90AA1
CYBB	Cytochrome B-245 Beta Chain	Protein Coding	P04839	56	GC0XP037780	22.4447	https://www.genecards.org/cgi-bin/carddisp.pl?gene=CYBB
HSPA4	Heat Shock Protein Family A (Hsp70) Member 4	Protein Coding	P34932	49	GC05P133062	22.4388	https://www.genecards.org/cgi-bin/carddisp.pl?gene=HSPA4
RYR1	Ryanodine Receptor 1	Protein Coding	P21817	54	GC19P083224	22.1783	https://www.genecards.org/cgi-bin/carddisp.pl?gene=RYR1
IFNG	Interferon Gamma	Protein Coding	P01579	57	GC12M068154	22.1621	https://www.genecards.org/cgi-bin/carddisp.pl?gene=IFNG
PRDX5	Peroxiredoxin 5	Protein Coding	P30044	50	GC11P064582	22.0242	https://www.genecards.org/cgi-bin/carddisp.pl?gene=PRDX5
MIPEP	Mitochondrial Intermediate Peptidase	Protein Coding	Q99797	48	GC13M023730	21.7657	https://www.genecards.org/cgi-bin/carddisp.pl?gene=MIPEP
EDN1	Endothelin 1	Protein Coding	P05305	56	GC06P012236	21.7628	https://www.genecards.org/cgi-bin/carddisp.pl?gene=EDN1
NFKB1	Nuclear Factor Kappa B Subunit 1	Protein Coding	P19838	60	GC04P102501	21.6896	https://www.genecards.org/cgi-bin/carddisp.pl?gene=NFKB1
MSRA	Methionine Sulfoxide Reductase A	Protein Coding	Q9UJ68	48	GC08P010054	21.6734	https://www.genecards.org/cgi-bin/carddisp.pl?gene=MSRA
EIF2S1	Eukaryotic Translation Initiation Factor 2 Subunit Alpha	Protein Coding	P05198	50	GC14P067359	21.6441	https://www.genecards.org/cgi-bin/carddisp.pl?gene=EIF2S1
ACADM	Acyl-CoA Dehydrogenase Medium Chain	Protein Coding	P11310	53	GC01P075724	21.4823	https://www.genecards.org/cgi-bin/carddisp.pl?gene=ACADM
GAPDH	Glyceraldehyde-3-Phosphate Dehydrogenase	Protein Coding	P04406	57	GC12P028185	21.4269	https://www.genecards.org/cgi-bin/carddisp.pl?gene=GAPDH
HIF1A	Hypoxia Inducible Factor 1 Subunit Alpha	Protein Coding	Q16665	55	GC14P061695	21.09	https://www.genecards.org/cgi-bin/carddisp.pl?gene=HIF1A
BDNF	Brain Derived Neurotrophic Factor	Protein Coding	P23560	56	GC11M027654	21.0779	https://www.genecards.org/cgi-bin/carddisp.pl?gene=BDNF
BAX	BCL2 Associated X, Apoptosis Regulator	Protein Coding	Q07812	57	GC19P048954	20.9409	https://www.genecards.org/cgi-bin/carddisp.pl?gene=BAX
ADPRS	ADP-Ribosylserine Hydrolase	Protein Coding	Q9NX46	44	GC01P036092	20.9397	https://www.genecards.org/cgi-bin/carddisp.pl?gene=ADPRS
CPT1A	Carnitine Palmitoyltransferase 1A	Protein Coding	P50416	54	GC11M068754	20.914	https://www.genecards.org/cgi-bin/carddisp.pl?gene=CPT1A
CCL2	C-C Motif Chemokine Ligand 2	Protein Coding	P13500	55	GC17P034255	20.8901	https://www.genecards.org/cgi-bin/carddisp.pl?gene=CCL2
SNCA	Synuclein Alpha	Protein Coding	P37840	58	GC04M089724	20.8258	https://www.genecards.org/cgi-bin/carddisp.pl?gene=SNCA
NDUFS4	NADH:Ubiquinone Oxidoreductase Subunit S4	Protein Coding	O43181	50	GC05P053560	20.748	https://www.genecards.org/cgi-bin/carddisp.pl?gene=NDUFS4
CYP2D6	Cytochrome P450 Family 2 Subfamily D Member 6	Protein Coding	P10635	52	GC22M042126	20.718	https://www.genecards.org/cgi-bin/carddisp.pl?gene=CYP2D6
VEGFA	Vascular Endothelial Growth Factor A	Protein Coding	P15692	56	GC06P043770	20.6713	https://www.genecards.org/cgi-bin/carddisp.pl?gene=VEGFA
MRPS22	Mitochondrial Ribosomal Protein S22	Protein Coding	P82650	48	GC03P139005	20.6144	https://www.genecards.org/cgi-bin/carddisp.pl?gene=MRPS22
ATP5F1A	ATP Synthase F1 Subunit Alpha	Protein Coding	P25705	53	GC18M046081	20.5326	https://www.genecards.org/cgi-bin/carddisp.pl?gene=ATP5F1A
HSPA1A	Heat Shock Protein Family A (Hsp70) Member 1A	Protein Coding	P0DMV8	53	GC06P104117	20.4633	https://www.genecards.org/cgi-bin/carddisp.pl?gene=HSPA1A
APEX1	Apurinic/Apyrimidinic Endodeoxyribonuclease 1	Protein Coding	P27695	52	GC14P020455	20.3678	https://www.genecards.org/cgi-bin/carddisp.pl?gene=APEX1
CP	Ceruloplasmin	Protein Coding	P00450	55	GC03M149162	20.3002	https://www.genecards.org/cgi-bin/carddisp.pl?gene=CP
SLC25A26	Solute Carrier Family 25 Member 26	Protein Coding	Q70HW3	44	GC03P066120	20.1723	https://www.genecards.org/cgi-bin/carddisp.pl?gene=SLC25A26
TGFB1	Transforming Growth Factor Beta 1	Protein Coding	P01137	60	GC19M041301	20.1197	https://www.genecards.org/cgi-bin/carddisp.pl?gene=TGFB1
CYP1A1	Cytochrome P450 Family 1 Subfamily A Member 1	Protein Coding	P04798	54	GC15M074719	20.0175	https://www.genecards.org/cgi-bin/carddisp.pl?gene=CYP1A1
ACE	Angiotensin I Converting Enzyme	Protein Coding	P12821	58	GC17P063477	20.0088	https://www.genecards.org/cgi-bin/carddisp.pl?gene=ACE
SOD3	Superoxide Dismutase 3	Protein Coding	P08294	49	GC04P024798	19.9828	https://www.genecards.org/cgi-bin/carddisp.pl?gene=SOD3
ABL1	ABL Proto-Oncogene 1, Non-Receptor Tyrosine Kinase	Protein Coding	P00519	60	GC09P130713	19.9294	https://www.genecards.org/cgi-bin/carddisp.pl?gene=ABL1
NR3C1	Nuclear Receptor Subfamily 3 Group C Member 1	Protein Coding	P04150	56	GC05M143277	19.9264	https://www.genecards.org/cgi-bin/carddisp.pl?gene=NR3C1
MAPK9	Mitogen-Activated Protein Kinase 9	Protein Coding	P45984	55	GC05M180273	19.9168	https://www.genecards.org/cgi-bin/carddisp.pl?gene=MAPK9
CYP3A4	Cytochrome P450 Family 3 Subfamily A Member 4	Protein Coding	P08684	55	GC07M099773	19.8432	https://www.genecards.org/cgi-bin/carddisp.pl?gene=CYP3A4
GSTT1	Glutathione S-Transferase Theta 1	Protein Coding	P30711	38	GC22Mi00270	19.7485	https://www.genecards.org/cgi-bin/carddisp.pl?gene=GSTT1
FOS	Fos Proto-Oncogene, AP-1 Transcription Factor Subunit	Protein Coding	P01100	58	GC14P075278	19.7396	https://www.genecards.org/cgi-bin/carddisp.pl?gene=FOS
STIP1	Stress Induced Phosphoprotein 1	Protein Coding	P31948	52	GC11P064575	19.7069	https://www.genecards.org/cgi-bin/carddisp.pl?gene=STIP1
ANK2	Ankyrin 2	Protein Coding	Q01484	48	GC04P112719	19.691	https://www.genecards.org/cgi-bin/carddisp.pl?gene=ANK2
NFS1	NFS1 Cysteine Desulfurase	Protein Coding	Q9Y697	51	GC20M035668	19.6659	https://www.genecards.org/cgi-bin/carddisp.pl?gene=NFS1
MAOA	Monoamine Oxidase A	Protein Coding	P21397	56	GC0XP043654	19.6203	https://www.genecards.org/cgi-bin/carddisp.pl?gene=MAOA
ACADS	Acyl-CoA Dehydrogenase Short Chain	Protein Coding	P16219	52	GC12P128210	19.4931	https://www.genecards.org/cgi-bin/carddisp.pl?gene=ACADS
VWF	Von Willebrand Factor	Protein Coding	P04275	54	GC12M006031	19.3179	https://www.genecards.org/cgi-bin/carddisp.pl?gene=VWF
CAV1	Caveolin 1	Protein Coding	Q03135	55	GC07P116524	19.289	https://www.genecards.org/cgi-bin/carddisp.pl?gene=CAV1
PRDX6	Peroxiredoxin 6	Protein Coding	P30041	53	GC01P173477	19.2865	https://www.genecards.org/cgi-bin/carddisp.pl?gene=PRDX6
APOE	Apolipoprotein E	Protein Coding	P02649	57	GC19P083472	19.2074	https://www.genecards.org/cgi-bin/carddisp.pl?gene=APOE
HBG2	Hemoglobin Subunit Gamma 2	Protein Coding	P69892	48	GC11M008315	19.2019	https://www.genecards.org/cgi-bin/carddisp.pl?gene=HBG2
UCP2	Uncoupling Protein 2	Protein Coding	P55851	53	GC11M073974	19.1806	https://www.genecards.org/cgi-bin/carddisp.pl?gene=UCP2
CYP1A2	Cytochrome P450 Family 1 Subfamily A Member 2	Protein Coding	P05177	52	GC15P074748	19.1795	https://www.genecards.org/cgi-bin/carddisp.pl?gene=CYP1A2
ATM	ATM Serine/Threonine Kinase	Protein Coding	Q13315	60	GC11P108222	19.1349	https://www.genecards.org/cgi-bin/carddisp.pl?gene=ATM
CYP2E1	Cytochrome P450 Family 2 Subfamily E Member 1	Protein Coding	P05181	53	GC10P133520	19.1044	https://www.genecards.org/cgi-bin/carddisp.pl?gene=CYP2E1
NPY	Neuropeptide Y	Protein Coding	P01303	51	GC07P024290	19.0735	https://www.genecards.org/cgi-bin/carddisp.pl?gene=NPY
QRSL1	Glutaminyl-TRNA Amidotransferase Subunit QRSL1	Protein Coding	Q9H0R6	48	GC06P106629	19.0091	https://www.genecards.org/cgi-bin/carddisp.pl?gene=QRSL1
C1QBP	Complement C1q Binding Protein	Protein Coding	Q07021	50	GC17M005432	18.9788	https://www.genecards.org/cgi-bin/carddisp.pl?gene=C1QBP
SELENON	Selenoprotein N	Protein Coding	Q9NZV5	44	GC01P025800	18.9544	https://www.genecards.org/cgi-bin/carddisp.pl?gene=SELENON
LMNA	Lamin A/C	Protein Coding	P02545	57	GC01P156082	18.9347	https://www.genecards.org/cgi-bin/carddisp.pl?gene=LMNA
NUDT1	Nudix Hydrolase 1	Protein Coding	P36639	48	GC07P002242	18.8204	https://www.genecards.org/cgi-bin/carddisp.pl?gene=NUDT1
PRKCD	Protein Kinase C Delta	Protein Coding	Q05655	58	GC03P053156	18.7817	https://www.genecards.org/cgi-bin/carddisp.pl?gene=PRKCD
PPARGC1A	PPARG Coactivator 1 Alpha	Protein Coding	Q9UBK2	54	GC04M023755	18.7753	https://www.genecards.org/cgi-bin/carddisp.pl?gene=PPARGC1A
MAPK3	Mitogen-Activated Protein Kinase 3	Protein Coding	P27361	56	GC16M040839	18.7105	https://www.genecards.org/cgi-bin/carddisp.pl?gene=MAPK3
ATF6	Activating Transcription Factor 6	Protein Coding	P18850	55	GC01P161766	18.6543	https://www.genecards.org/cgi-bin/carddisp.pl?gene=ATF6
MRPS34	Mitochondrial Ribosomal Protein S34	Protein Coding	P82930	43	GC16M001771	18.6194	https://www.genecards.org/cgi-bin/carddisp.pl?gene=MRPS34
KNG1	Kininogen 1	Protein Coding	P01042	54	GC03P186717	18.4691	https://www.genecards.org/cgi-bin/carddisp.pl?gene=KNG1
FMO3	Flavin Containing Dimethylaniline Monoxygenase 3	Protein Coding	P31513	53	GC01P171090	18.4648	https://www.genecards.org/cgi-bin/carddisp.pl?gene=FMO3
HSD17B4	Hydroxysteroid 17-Beta Dehydrogenase 4	Protein Coding	P51659	53	GC05P119452	18.2948	https://www.genecards.org/cgi-bin/carddisp.pl?gene=HSD17B4
PRDX3	Peroxiredoxin 3	Protein Coding	P30048	52	GC10M119167	18.25	https://www.genecards.org/cgi-bin/carddisp.pl?gene=PRDX3
SHC1	SHC Adaptor Protein 1	Protein Coding	P29353	50	GC01M154962	18.2351	https://www.genecards.org/cgi-bin/carddisp.pl?gene=SHC1
PPARG	Peroxisome Proliferator Activated Receptor Gamma	Protein Coding	P37231	60	GC03P012287	18.2208	https://www.genecards.org/cgi-bin/carddisp.pl?gene=PPARG
POMC	Proopiomelanocortin	Protein Coding	P01189	54	GC02M025160	18.2021	https://www.genecards.org/cgi-bin/carddisp.pl?gene=POMC
GCH1	GTP Cyclohydrolase 1	Protein Coding	P30793	54	GC14M054842	18.1401	https://www.genecards.org/cgi-bin/carddisp.pl?gene=GCH1
SDHB	Succinate Dehydrogenase Complex Iron Sulfur Subunit B	Protein Coding	P21912	55	GC01M018664	18.1138	https://www.genecards.org/cgi-bin/carddisp.pl?gene=SDHB
PTCD3	Pentatricopeptide Repeat Domain 3	Protein Coding	Q96EY7	46	GC02P086106	18.0535	https://www.genecards.org/cgi-bin/carddisp.pl?gene=PTCD3
PRDX1	Peroxiredoxin 1	Protein Coding	Q06830	56	GC01M045622	18.0313	https://www.genecards.org/cgi-bin/carddisp.pl?gene=PRDX1
ESR1	Estrogen Receptor 1	Protein Coding	P03372	61	GC06P151656	18.0097	https://www.genecards.org/cgi-bin/carddisp.pl?gene=ESR1
POLRMT	RNA Polymerase Mitochondrial	Protein Coding	O00411	49	GC19M000617	17.9716	https://www.genecards.org/cgi-bin/carddisp.pl?gene=POLRMT
G3BP2	G3BP Stress Granule Assembly Factor 2	Protein Coding	Q9UN86	44	GC04M075642	17.9187	https://www.genecards.org/cgi-bin/carddisp.pl?gene=G3BP2
ATP5F1B	ATP Synthase F1 Subunit Beta	Protein Coding	P06576	50	GC12M057362	17.893	https://www.genecards.org/cgi-bin/carddisp.pl?gene=ATP5F1B
CREB1	CAMP Responsive Element Binding Protein 1	Protein Coding	P16220	57	GC02P207529	17.8807	https://www.genecards.org/cgi-bin/carddisp.pl?gene=CREB1
ERN1	Endoplasmic Reticulum To Nucleus Signaling 1	Protein Coding	O75460	54	GC17M064039	17.7082	https://www.genecards.org/cgi-bin/carddisp.pl?gene=ERN1
SDHA	Succinate Dehydrogenase Complex Flavoprotein Subunit A	Protein Coding	P31040	55	GC05P000220	17.5494	https://www.genecards.org/cgi-bin/carddisp.pl?gene=SDHA
MRPS16	Mitochondrial Ribosomal Protein S16	Protein Coding	Q9Y3D3	49	GC10M073248	17.5416	https://www.genecards.org/cgi-bin/carddisp.pl?gene=MRPS16
HSPA8	Heat Shock Protein Family A (Hsp70) Member 8	Protein Coding	P11142	56	GC11M123057	17.5163	https://www.genecards.org/cgi-bin/carddisp.pl?gene=HSPA8
TLR4	Toll Like Receptor 4	Protein Coding	O00206	58	GC09P117704	17.4983	https://www.genecards.org/cgi-bin/carddisp.pl?gene=TLR4
SCN5A	Sodium Voltage-Gated Channel Alpha Subunit 5	Protein Coding	Q14524	57	GC03M038560	17.4664	https://www.genecards.org/cgi-bin/carddisp.pl?gene=SCN5A
SERP1	Stress Associated Endoplasmic Reticulum Protein 1	Protein Coding	Q9Y6X1	38	GC03M150541	17.4486	https://www.genecards.org/cgi-bin/carddisp.pl?gene=SERP1
TRMT10C	TRNA Methyltransferase 10C, Mitochondrial RNase P Subunit	Protein Coding	Q7L0Y3	45	GC03P101561	17.3742	https://www.genecards.org/cgi-bin/carddisp.pl?gene=TRMT10C
FXN	Frataxin	Protein Coding	Q16595	53	GC09P069035	17.3233	https://www.genecards.org/cgi-bin/carddisp.pl?gene=FXN
ACAD9	Acyl-CoA Dehydrogenase Family Member 9	Protein Coding	Q9H845	52	GC03P136166	17.3178	https://www.genecards.org/cgi-bin/carddisp.pl?gene=ACAD9
PINK1	PTEN Induced Kinase 1	Protein Coding	Q9BXM7	53	GC01P020634	17.3048	https://www.genecards.org/cgi-bin/carddisp.pl?gene=PINK1
MTOR	Mechanistic Target Of Rapamycin Kinase	Protein Coding	P42345	62	GC01M011106	17.3018	https://www.genecards.org/cgi-bin/carddisp.pl?gene=MTOR
ICAM1	Intercellular Adhesion Molecule 1	Protein Coding	P05362	57	GC19P011104	17.276	https://www.genecards.org/cgi-bin/carddisp.pl?gene=ICAM1
IL10	Interleukin 10	Protein Coding	P22301	54	GC01M206767	17.177	https://www.genecards.org/cgi-bin/carddisp.pl?gene=IL10
NOX4	NADPH Oxidase 4	Protein Coding	Q9NPH5	49	GC11M089324	17.0921	https://www.genecards.org/cgi-bin/carddisp.pl?gene=NOX4
GPX3	Glutathione Peroxidase 3	Protein Coding	P22352	47	GC05P150997	17.0762	https://www.genecards.org/cgi-bin/carddisp.pl?gene=GPX3
MAOB	Monoamine Oxidase B	Protein Coding	P27338	50	GC0XM043766	17.0327	https://www.genecards.org/cgi-bin/carddisp.pl?gene=MAOB
TXNRD1	Thioredoxin Reductase 1	Protein Coding	Q16881	51	GC12P104215	16.956	https://www.genecards.org/cgi-bin/carddisp.pl?gene=TXNRD1
COX5A	Cytochrome C Oxidase Subunit 5A	Protein Coding	P20674	50	GC15M074919	16.9467	https://www.genecards.org/cgi-bin/carddisp.pl?gene=COX5A
CAV3	Caveolin 3	Protein Coding	P56539	49	GC03P008733	16.935	https://www.genecards.org/cgi-bin/carddisp.pl?gene=CAV3
VARS1	Valyl-TRNA Synthetase 1	Protein Coding	P26640	50	GC06M080937	16.9145	https://www.genecards.org/cgi-bin/carddisp.pl?gene=VARS1
TRPM2	Transient Receptor Potential Cation Channel Subfamily M Member 2	Protein Coding	O94759	48	GC21P044350	16.8929	https://www.genecards.org/cgi-bin/carddisp.pl?gene=TRPM2
ACOX1	Acyl-CoA Oxidase 1	Protein Coding	Q15067	53	GC17M075941	16.8923	https://www.genecards.org/cgi-bin/carddisp.pl?gene=ACOX1
TRIT1	TRNA Isopentenyltransferase 1	Protein Coding	Q9H3H1	49	GC01M039842	16.7931	https://www.genecards.org/cgi-bin/carddisp.pl?gene=TRIT1
P4HB	Prolyl 4-Hydroxylase Subunit Beta	Protein Coding	P07237	56	GC17M081843	16.7787	https://www.genecards.org/cgi-bin/carddisp.pl?gene=P4HB
SURF1	SURF1 Cytochrome C Oxidase Assembly Factor	Protein Coding	Q15526	48	GC09M133351	16.7724	https://www.genecards.org/cgi-bin/carddisp.pl?gene=SURF1
CDKN1A	Cyclin Dependent Kinase Inhibitor 1A	Protein Coding	P38936	56	GC06P104241	16.7686	https://www.genecards.org/cgi-bin/carddisp.pl?gene=CDKN1A
MRPL12	Mitochondrial Ribosomal Protein L12	Protein Coding	P52815	46	GC17P084221	16.7647	https://www.genecards.org/cgi-bin/carddisp.pl?gene=MRPL12
MAP2K4	Mitogen-Activated Protein Kinase Kinase 4	Protein Coding	P45985	54	GC17P012020	16.5755	https://www.genecards.org/cgi-bin/carddisp.pl?gene=MAP2K4
CASP9	Caspase 9	Protein Coding	P55211	54	GC01M015491	16.5714	https://www.genecards.org/cgi-bin/carddisp.pl?gene=CASP9
OXR1	Oxidation Resistance 1	Protein Coding	Q8N573	46	GC08P106271	16.5238	https://www.genecards.org/cgi-bin/carddisp.pl?gene=OXR1
PRKAA1	Protein Kinase AMP-Activated Catalytic Subunit Alpha 1	Protein Coding	Q13131	53	GC05M040759	16.5038	https://www.genecards.org/cgi-bin/carddisp.pl?gene=PRKAA1
CACNA1C	Calcium Voltage-Gated Channel Subunit Alpha1 C	Protein Coding	Q13936	56	GC12P001970	16.4302	https://www.genecards.org/cgi-bin/carddisp.pl?gene=CACNA1C
HBB	Hemoglobin Subunit Beta	Protein Coding	P68871	52	GC11M008309	16.4045	https://www.genecards.org/cgi-bin/carddisp.pl?gene=HBB
ETFDH	Electron Transfer Flavoprotein Dehydrogenase	Protein Coding	Q16134	52	GC04P158672	16.377	https://www.genecards.org/cgi-bin/carddisp.pl?gene=ETFDH
ALDH2	Aldehyde Dehydrogenase 2 Family Member	Protein Coding	P05091	57	GC12P111766	16.3607	https://www.genecards.org/cgi-bin/carddisp.pl?gene=ALDH2
ADIPOQ	Adiponectin, C1Q And Collagen Domain Containing	Protein Coding	Q15848	52	GC03P186842	16.329	https://www.genecards.org/cgi-bin/carddisp.pl?gene=ADIPOQ
CLU	Clusterin	Protein Coding	P10909	54	GC08M027596	16.3025	https://www.genecards.org/cgi-bin/carddisp.pl?gene=CLU
SFXN4	Sideroflexin 4	Protein Coding	Q6P4A7	46	GC10M119140	16.2501	https://www.genecards.org/cgi-bin/carddisp.pl?gene=SFXN4
TXNIP	Thioredoxin Interacting Protein	Protein Coding	Q9H3M7	46	GC01M145992	16.2463	https://www.genecards.org/cgi-bin/carddisp.pl?gene=TXNIP
MAP2K6	Mitogen-Activated Protein Kinase Kinase 6	Protein Coding	P52564	53	GC17P069414	16.2328	https://www.genecards.org/cgi-bin/carddisp.pl?gene=MAP2K6
SQSTM1	Sequestosome 1	Protein Coding	Q13501	56	GC05P179806	16.2321	https://www.genecards.org/cgi-bin/carddisp.pl?gene=SQSTM1
MRPS2	Mitochondrial Ribosomal Protein S2	Protein Coding	Q9Y399	45	GC09P135499	16.1444	https://www.genecards.org/cgi-bin/carddisp.pl?gene=MRPS2
APOA1	Apolipoprotein A1	Protein Coding	P02647	57	GC11M116835	16.1094	https://www.genecards.org/cgi-bin/carddisp.pl?gene=APOA1
EIF2AK2	Eukaryotic Translation Initiation Factor 2 Alpha Kinase 2	Protein Coding	P19525	57	GC02M037099	16.0981	https://www.genecards.org/cgi-bin/carddisp.pl?gene=EIF2AK2
CALM3	Calmodulin 3	Protein Coding	P0DP25	49	GC19P046601	16.0914	https://www.genecards.org/cgi-bin/carddisp.pl?gene=CALM3
CRHR1	Corticotropin Releasing Hormone Receptor 1	Protein Coding	P34998	50	GC17P045784	16.0801	https://www.genecards.org/cgi-bin/carddisp.pl?gene=CRHR1
ACADL	Acyl-CoA Dehydrogenase Long Chain	Protein Coding	P28330	48	GC02M210187	16.0673	https://www.genecards.org/cgi-bin/carddisp.pl?gene=ACADL
MDM2	MDM2 Proto-Oncogene	Protein Coding	Q00987	60	GC12P068808	16.0646	https://www.genecards.org/cgi-bin/carddisp.pl?gene=MDM2
NOX1	NADPH Oxidase 1	Protein Coding	Q9Y5S8	49	GC0XM100843	16.0239	https://www.genecards.org/cgi-bin/carddisp.pl?gene=NOX1
PRKAA2	Protein Kinase AMP-Activated Catalytic Subunit Alpha 2	Protein Coding	P54646	57	GC01P056645	16.0169	https://www.genecards.org/cgi-bin/carddisp.pl?gene=PRKAA2
CD36	CD36 Molecule	Protein Coding	P16671	56	GC07P080369	15.9724	https://www.genecards.org/cgi-bin/carddisp.pl?gene=CD36
BLVRB	Biliverdin Reductase B	Protein Coding	P30043	46	GC19M040447	15.9555	https://www.genecards.org/cgi-bin/carddisp.pl?gene=BLVRB
MB	Myoglobin	Protein Coding	P02144	51	GC22M035606	15.9507	https://www.genecards.org/cgi-bin/carddisp.pl?gene=MB
SP1	Sp1 Transcription Factor	Protein Coding	P08047	52	GC12P053380	15.8999	https://www.genecards.org/cgi-bin/carddisp.pl?gene=SP1
KCNJ5	Potassium Inwardly Rectifying Channel Subfamily J Member 5	Protein Coding	P48544	54	GC11P128891	15.7921	https://www.genecards.org/cgi-bin/carddisp.pl?gene=KCNJ5
LYRM4	LYR Motif Containing 4	Protein Coding	Q9HD34	45	GC06M005033	15.7876	https://www.genecards.org/cgi-bin/carddisp.pl?gene=LYRM4
MAPT	Microtubule Associated Protein Tau	Protein Coding	P10636	57	GC17P045894	15.7581	https://www.genecards.org/cgi-bin/carddisp.pl?gene=MAPT
PRORP	Protein Only RNase P Catalytic Subunit	Protein Coding	O15091	44	GC14P038649	15.7465	https://www.genecards.org/cgi-bin/carddisp.pl?gene=PRORP
PPARA	Peroxisome Proliferator Activated Receptor Alpha	Protein Coding	Q07869	51	GC22P046150	15.734	https://www.genecards.org/cgi-bin/carddisp.pl?gene=PPARA
VCAM1	Vascular Cell Adhesion Molecule 1	Protein Coding	P19320	53	GC01P100719	15.707	https://www.genecards.org/cgi-bin/carddisp.pl?gene=VCAM1
SLC25A20	Solute Carrier Family 25 Member 20	Protein Coding	O43772	52	GC03M048893	15.6126	https://www.genecards.org/cgi-bin/carddisp.pl?gene=SLC25A20
MAPK11	Mitogen-Activated Protein Kinase 11	Protein Coding	Q15759	53	GC22M050263	15.6121	https://www.genecards.org/cgi-bin/carddisp.pl?gene=MAPK11
EHHADH	Enoyl-CoA Hydratase And 3-Hydroxyacyl CoA Dehydrogenase	Protein Coding	Q08426	50	GC03M185190	15.609	https://www.genecards.org/cgi-bin/carddisp.pl?gene=EHHADH
OXT	Oxytocin/Neurophysin I Prepropeptide	Protein Coding	P01178	45	GC20P004889	15.5955	https://www.genecards.org/cgi-bin/carddisp.pl?gene=OXT
ABCD1	ATP Binding Cassette Subfamily D Member 1	Protein Coding	P33897	53	GC0XP153724	15.5924	https://www.genecards.org/cgi-bin/carddisp.pl?gene=ABCD1
MAPKAPK2	MAPK Activated Protein Kinase 2	Protein Coding	P49137	53	GC01P206684	15.5559	https://www.genecards.org/cgi-bin/carddisp.pl?gene=MAPKAPK2
VCP	Valosin Containing Protein	Protein Coding	P55072	56	GC09M035056	15.5392	https://www.genecards.org/cgi-bin/carddisp.pl?gene=VCP
SRC	SRC Proto-Oncogene, Non-Receptor Tyrosine Kinase	Protein Coding	P12931	58	GC20P037344	15.5341	https://www.genecards.org/cgi-bin/carddisp.pl?gene=SRC
NR3C2	Nuclear Receptor Subfamily 3 Group C Member 2	Protein Coding	P08235	53	GC04M148078	15.5333	https://www.genecards.org/cgi-bin/carddisp.pl?gene=NR3C2
KCNH2	Potassium Voltage-Gated Channel Subfamily H Member 2	Protein Coding	Q12809	57	GC07M150944	15.5189	https://www.genecards.org/cgi-bin/carddisp.pl?gene=KCNH2
GATB	Glutamyl-TRNA Amidotransferase Subunit B	Protein Coding	O75879	48	GC04M151670	15.503	https://www.genecards.org/cgi-bin/carddisp.pl?gene=GATB
AGTR1	Angiotensin II Receptor Type 1	Protein Coding	P30556	58	GC03P148697	15.4989	https://www.genecards.org/cgi-bin/carddisp.pl?gene=AGTR1
AGT	Angiotensinogen	Protein Coding	P01019	56	GC01M230690	15.4947	https://www.genecards.org/cgi-bin/carddisp.pl?gene=AGT
ATF2	Activating Transcription Factor 2	Protein Coding	P15336	54	GC02M175072	15.3151	https://www.genecards.org/cgi-bin/carddisp.pl?gene=ATF2
HMGB1	High Mobility Group Box 1	Protein Coding	P09429	55	GC13M030456	15.2854	https://www.genecards.org/cgi-bin/carddisp.pl?gene=HMGB1
PDE5A	Phosphodiesterase 5A	Protein Coding	O76074	51	GC04M119494	15.2598	https://www.genecards.org/cgi-bin/carddisp.pl?gene=PDE5A
HADH	Hydroxyacyl-CoA Dehydrogenase	Protein Coding	Q16836	54	GC04P107989	15.2367	https://www.genecards.org/cgi-bin/carddisp.pl?gene=HADH
LEP	Leptin	Protein Coding	P41159	53	GC07P128241	15.231	https://www.genecards.org/cgi-bin/carddisp.pl?gene=LEP
SNTA1	Syntrophin Alpha 1	Protein Coding	Q13424	52	GC20M033407	15.1996	https://www.genecards.org/cgi-bin/carddisp.pl?gene=SNTA1
MSRB2	Methionine Sulfoxide Reductase B2	Protein Coding	Q9Y3D2	46	GC10P023095	15.1933	https://www.genecards.org/cgi-bin/carddisp.pl?gene=MSRB2
GPX7	Glutathione Peroxidase 7	Protein Coding	Q96SL4	49	GC01P052602	15.1631	https://www.genecards.org/cgi-bin/carddisp.pl?gene=GPX7
PLA2G7	Phospholipase A2 Group VII	Protein Coding	Q13093	57	GC06M046704	15.1448	https://www.genecards.org/cgi-bin/carddisp.pl?gene=PLA2G7
SERAC1	Serine Active Site Containing 1	Protein Coding	Q96JX3	43	GC06M158109	15.1185	https://www.genecards.org/cgi-bin/carddisp.pl?gene=SERAC1
NUBPL	NUBP Iron-Sulfur Cluster Assembly Factor, Mitochondrial	Protein Coding	Q8TB37	47	GC14P031489	15.1139	https://www.genecards.org/cgi-bin/carddisp.pl?gene=NUBPL
IL1A	Interleukin 1 Alpha	Protein Coding	P01583	52	GC02M112773	15.1101	https://www.genecards.org/cgi-bin/carddisp.pl?gene=IL1A
EIF2AK1	Eukaryotic Translation Initiation Factor 2 Alpha Kinase 1	Protein Coding	Q9BQI3	50	GC07M006022	15.0841	https://www.genecards.org/cgi-bin/carddisp.pl?gene=EIF2AK1
STAT3	Signal Transducer And Activator Of Transcription 3	Protein Coding	P40763	61	GC17M042313	15.0811	https://www.genecards.org/cgi-bin/carddisp.pl?gene=STAT3
GATC	Glutamyl-TRNA Amidotransferase Subunit C	Protein Coding	O43716	44	GC12P120446	15.078	https://www.genecards.org/cgi-bin/carddisp.pl?gene=GATC
MICOS13	Mitochondrial Contact Site And Cristae Organizing System Subunit 13	Protein Coding	Q5XKP0	43	GC19M009382	15.0444	https://www.genecards.org/cgi-bin/carddisp.pl?gene=MICOS13
BRCA1	BRCA1 DNA Repair Associated	Protein Coding	P38398	57	GC17M043044	14.9799	https://www.genecards.org/cgi-bin/carddisp.pl?gene=BRCA1
POLG	DNA Polymerase Gamma, Catalytic Subunit	Protein Coding	P54098	54	GC15M133858	14.9304	https://www.genecards.org/cgi-bin/carddisp.pl?gene=POLG
COMT	Catechol-O-Methyltransferase	Protein Coding	P21964	58	GC22P019941	14.864	https://www.genecards.org/cgi-bin/carddisp.pl?gene=COMT
SDHD	Succinate Dehydrogenase Complex Subunit D	Protein Coding	O14521	52	GC11P112156	14.8444	https://www.genecards.org/cgi-bin/carddisp.pl?gene=SDHD
MT-CO1	Mitochondrially Encoded Cytochrome C Oxidase I	Protein Coding	P00395	38	GCMTP005906	14.8174	https://www.genecards.org/cgi-bin/carddisp.pl?gene=MT-CO1
TF	Transferrin	Protein Coding	P02787	57	GC03P136239	14.802	https://www.genecards.org/cgi-bin/carddisp.pl?gene=TF
MAP2K3	Mitogen-Activated Protein Kinase Kinase 3	Protein Coding	P46734	56	GC17P076203	14.7859	https://www.genecards.org/cgi-bin/carddisp.pl?gene=MAP2K3
GCLC	Glutamate-Cysteine Ligase Catalytic Subunit	Protein Coding	P48506	52	GC06M053497	14.7231	https://www.genecards.org/cgi-bin/carddisp.pl?gene=GCLC
GLRX	Glutaredoxin	Protein Coding	P35754	49	GC05M095752	14.6984	https://www.genecards.org/cgi-bin/carddisp.pl?gene=GLRX
MSRB1	Methionine Sulfoxide Reductase B1	Protein Coding	Q9NZV6	44	GC16M010433	14.6555	https://www.genecards.org/cgi-bin/carddisp.pl?gene=MSRB1
PON2	Paraoxonase 2	Protein Coding	Q15165	50	GC07M095404	14.6222	https://www.genecards.org/cgi-bin/carddisp.pl?gene=PON2
DGUOK	Deoxyguanosine Kinase	Protein Coding	Q16854	50	GC02P073926	14.6193	https://www.genecards.org/cgi-bin/carddisp.pl?gene=DGUOK
CDKN2A	Cyclin Dependent Kinase Inhibitor 2A	Protein Coding	Q8N726	58	GC09M021967	14.5806	https://www.genecards.org/cgi-bin/carddisp.pl?gene=CDKN2A
TRMT5	TRNA Methyltransferase 5	Protein Coding	Q32P41	45	GC14M060971	14.5362	https://www.genecards.org/cgi-bin/carddisp.pl?gene=TRMT5
CYP1B1	Cytochrome P450 Family 1 Subfamily B Member 1	Protein Coding	Q16678	55	GC02M038066	14.4899	https://www.genecards.org/cgi-bin/carddisp.pl?gene=CYP1B1
FKBP5	FKBP Prolyl Isomerase 5	Protein Coding	Q13451	55	GC06M081054	14.4897	https://www.genecards.org/cgi-bin/carddisp.pl?gene=FKBP5
EPO	Erythropoietin	Protein Coding	P01588	49	GC07P100720	14.4623	https://www.genecards.org/cgi-bin/carddisp.pl?gene=EPO
TH	Tyrosine Hydroxylase	Protein Coding	P07101	57	GC11M002163	14.404	https://www.genecards.org/cgi-bin/carddisp.pl?gene=TH
TIMM22	Translocase Of Inner Mitochondrial Membrane 22	Protein Coding	Q9Y584	44	GC17P000997	14.3709	https://www.genecards.org/cgi-bin/carddisp.pl?gene=TIMM22
SERPINE1	Serpin Family E Member 1	Protein Coding	P05121	57	GC07P101127	14.3547	https://www.genecards.org/cgi-bin/carddisp.pl?gene=SERPINE1
ETFA	Electron Transfer Flavoprotein Subunit Alpha	Protein Coding	P13804	52	GC15M133476	14.3261	https://www.genecards.org/cgi-bin/carddisp.pl?gene=ETFA
PRDX4	Peroxiredoxin 4	Protein Coding	Q13162	48	GC0XP023665	14.3211	https://www.genecards.org/cgi-bin/carddisp.pl?gene=PRDX4
PTGS1	Prostaglandin-Endoperoxide Synthase 1	Protein Coding	P23219	53	GC09P122370	14.3015	https://www.genecards.org/cgi-bin/carddisp.pl?gene=PTGS1
HMOX2	Heme Oxygenase 2	Protein Coding	P30519	52	GC16P004474	14.2992	https://www.genecards.org/cgi-bin/carddisp.pl?gene=HMOX2
CYP2C9	Cytochrome P450 Family 2 Subfamily C Member 9	Protein Coding	P11712	52	GC10P094938	14.2265	https://www.genecards.org/cgi-bin/carddisp.pl?gene=CYP2C9
POR	Cytochrome P450 Oxidoreductase	Protein Coding	P16435	56	GC07P075899	14.2264	https://www.genecards.org/cgi-bin/carddisp.pl?gene=POR
SIRT3	Sirtuin 3	Protein Coding	Q9NTG7	54	GC11M000215	14.2261	https://www.genecards.org/cgi-bin/carddisp.pl?gene=SIRT3
KCNQ1	Potassium Voltage-Gated Channel Subfamily Q Member 1	Protein Coding	P51787	57	GC11P002444	14.2149	https://www.genecards.org/cgi-bin/carddisp.pl?gene=KCNQ1
RHOA	Ras Homolog Family Member A	Protein Coding	P61586	57	GC03M049359	14.1795	https://www.genecards.org/cgi-bin/carddisp.pl?gene=RHOA
NCF2	Neutrophil Cytosolic Factor 2	Protein Coding	P19878	54	GC01M184754	14.1761	https://www.genecards.org/cgi-bin/carddisp.pl?gene=NCF2
RPS6KA5	Ribosomal Protein S6 Kinase A5	Protein Coding	O75582	53	GC14M090847	14.1689	https://www.genecards.org/cgi-bin/carddisp.pl?gene=RPS6KA5
NDUFS8	NADH:Ubiquinone Oxidoreductase Core Subunit S8	Protein Coding	O00217	51	GC11P068030	14.1403	https://www.genecards.org/cgi-bin/carddisp.pl?gene=NDUFS8
FAS	Fas Cell Surface Death Receptor	Protein Coding	P25445	57	GC10P098532	14.139	https://www.genecards.org/cgi-bin/carddisp.pl?gene=FAS
MRPL3	Mitochondrial Ribosomal Protein L3	Protein Coding	P09001	48	GC03M131462	14.1282	https://www.genecards.org/cgi-bin/carddisp.pl?gene=MRPL3
PTEN	Phosphatase And Tensin Homolog	Protein Coding	P60484	58	GC10P098516	14.1022	https://www.genecards.org/cgi-bin/carddisp.pl?gene=PTEN
AGER	Advanced Glycosylation End-Product Specific Receptor	Protein Coding	Q15109	53	GC06M032180	14.0438	https://www.genecards.org/cgi-bin/carddisp.pl?gene=AGER
CS	Citrate Synthase	Protein Coding	O75390	51	GC12M056271	14.0193	https://www.genecards.org/cgi-bin/carddisp.pl?gene=CS
MAP2K1	Mitogen-Activated Protein Kinase Kinase 1	Protein Coding	Q02750	61	GC15P066386	14.0152	https://www.genecards.org/cgi-bin/carddisp.pl?gene=MAP2K1
CYGB	Cytoglobin	Protein Coding	Q8WWM9	45	GC17M076527	14.0152	https://www.genecards.org/cgi-bin/carddisp.pl?gene=CYGB
SELP	Selectin P	Protein Coding	P16109	52	GC01M169558	13.9955	https://www.genecards.org/cgi-bin/carddisp.pl?gene=SELP
UCP3	Uncoupling Protein 3	Protein Coding	P55916	49	GC11M074000	13.8304	https://www.genecards.org/cgi-bin/carddisp.pl?gene=UCP3
MRPS7	Mitochondrial Ribosomal Protein S7	Protein Coding	Q9Y2R9	46	GC17P079406	13.7628	https://www.genecards.org/cgi-bin/carddisp.pl?gene=MRPS7
CYP2C19	Cytochrome P450 Family 2 Subfamily C Member 19	Protein Coding	P33261	50	GC10P094762	13.7561	https://www.genecards.org/cgi-bin/carddisp.pl?gene=CYP2C19
SELE	Selectin E	Protein Coding	P16581	50	GC01M169722	13.6892	https://www.genecards.org/cgi-bin/carddisp.pl?gene=SELE
ANXA5	Annexin A5	Protein Coding	P08758	53	GC04M121667	13.6482	https://www.genecards.org/cgi-bin/carddisp.pl?gene=ANXA5
PSEN1	Presenilin 1	Protein Coding	P49768	59	GC14P073136	13.5571	https://www.genecards.org/cgi-bin/carddisp.pl?gene=PSEN1
MAP2K7	Mitogen-Activated Protein Kinase Kinase 7	Protein Coding	O14733	52	GC19P007903	13.5102	https://www.genecards.org/cgi-bin/carddisp.pl?gene=MAP2K7
PRKCB	Protein Kinase C Beta	Protein Coding	P05771	55	GC16P046737	13.4978	https://www.genecards.org/cgi-bin/carddisp.pl?gene=PRKCB
STK25	Serine/Threonine Kinase 25	Protein Coding	O00506	47	GC02M241492	13.4411	https://www.genecards.org/cgi-bin/carddisp.pl?gene=STK25
GGT1	Gamma-Glutamyltransferase 1	Protein Coding	P19440	56	GC22P024583	13.4276	https://www.genecards.org/cgi-bin/carddisp.pl?gene=GGT1
EME2	Essential Meiotic Structure-Specific Endonuclease Subunit 2	Protein Coding	A4GXA9	40	GC16P045931	13.4269	https://www.genecards.org/cgi-bin/carddisp.pl?gene=EME2
FMO1	Flavin Containing Dimethylaniline Monoxygenase 1	Protein Coding	Q01740	49	GC01P171248	13.4246	https://www.genecards.org/cgi-bin/carddisp.pl?gene=FMO1
HERPUD1	Homocysteine Inducible ER Protein With Ubiquitin Like Domain 1	Protein Coding	Q15011	45	GC16P056932	13.4206	https://www.genecards.org/cgi-bin/carddisp.pl?gene=HERPUD1
IGF1	Insulin Like Growth Factor 1	Protein Coding	P05019	55	GC12M102395	13.4134	https://www.genecards.org/cgi-bin/carddisp.pl?gene=IGF1
PIK3CG	Phosphatidylinositol-4,5-Bisphosphate 3-Kinase Catalytic Subunit Gamma	Protein Coding	P48736	56	GC07P106865	13.3927	https://www.genecards.org/cgi-bin/carddisp.pl?gene=PIK3CG
SESN2	Sestrin 2	Protein Coding	P58004	45	GC01P029561	13.3567	https://www.genecards.org/cgi-bin/carddisp.pl?gene=SESN2
SGCB	Sarcoglycan Beta	Protein Coding	Q16585	46	GC04M052019	13.3208	https://www.genecards.org/cgi-bin/carddisp.pl?gene=SGCB
GPX4	Glutathione Peroxidase 4	Protein Coding	P36969	53	GC19P001103	13.3138	https://www.genecards.org/cgi-bin/carddisp.pl?gene=GPX4
BCL2L1	BCL2 Like 1	Protein Coding	Q07817	54	GC20M031664	13.3016	https://www.genecards.org/cgi-bin/carddisp.pl?gene=BCL2L1
ATF3	Activating Transcription Factor 3	Protein Coding	P18847	51	GC01P212565	13.2974	https://www.genecards.org/cgi-bin/carddisp.pl?gene=ATF3
KCNE1	Potassium Voltage-Gated Channel Subfamily E Regulatory Subunit 1	Protein Coding	P15382	53	GC21M034446	13.2953	https://www.genecards.org/cgi-bin/carddisp.pl?gene=KCNE1
MMP2	Matrix Metallopeptidase 2	Protein Coding	P08253	60	GC16P055390	13.268	https://www.genecards.org/cgi-bin/carddisp.pl?gene=MMP2
C2orf69	Chromosome 2 Open Reading Frame 69	Protein Coding	Q8N8R5	40	GC02P199911	13.2536	https://www.genecards.org/cgi-bin/carddisp.pl?gene=C2orf69
DDAH2	Dimethylarginine Dimethylaminohydrolase 2	Protein Coding	O95865	48	GC06M031727	13.1911	https://www.genecards.org/cgi-bin/carddisp.pl?gene=DDAH2
MTHFR	Methylenetetrahydrofolate Reductase	Protein Coding	P42898	54	GC01M011785	13.175	https://www.genecards.org/cgi-bin/carddisp.pl?gene=MTHFR
SRXN1	Sulfiredoxin 1	Protein Coding	Q9BYN0	41	GC20M000647	13.1405	https://www.genecards.org/cgi-bin/carddisp.pl?gene=SRXN1
TARDBP	TAR DNA Binding Protein	Protein Coding	Q13148	54	GC01P011013	13.1059	https://www.genecards.org/cgi-bin/carddisp.pl?gene=TARDBP
HTR2A	5-Hydroxytryptamine Receptor 2A	Protein Coding	P28223	54	GC13M046831	12.9501	https://www.genecards.org/cgi-bin/carddisp.pl?gene=HTR2A
PCNA	Proliferating Cell Nuclear Antigen	Protein Coding	P12004	57	GC20M005114	12.9364	https://www.genecards.org/cgi-bin/carddisp.pl?gene=PCNA
MUTYH	MutY DNA Glycosylase	Protein Coding	Q9UIF7	52	GC01M045329	12.9355	https://www.genecards.org/cgi-bin/carddisp.pl?gene=MUTYH
CALM2	Calmodulin 2	Protein Coding	P0DP24	52	GC02M047160	12.9042	https://www.genecards.org/cgi-bin/carddisp.pl?gene=CALM2
ATP2A2	ATPase Sarcoplasmic/Endoplasmic Reticulum Ca2+ Transporting 2	Protein Coding	P16615	58	GC12P110280	12.8841	https://www.genecards.org/cgi-bin/carddisp.pl?gene=ATP2A2
GSTA1	Glutathione S-Transferase Alpha 1	Protein Coding	P08263	49	GC06M052791	12.8766	https://www.genecards.org/cgi-bin/carddisp.pl?gene=GSTA1
RAC1	Rac Family Small GTPase 1	Protein Coding	P63000	56	GC07P006378	12.8611	https://www.genecards.org/cgi-bin/carddisp.pl?gene=RAC1
NLRP3	NLR Family Pyrin Domain Containing 3	Protein Coding	Q96P20	55	GC01P247415	12.8366	https://www.genecards.org/cgi-bin/carddisp.pl?gene=NLRP3
KDR	Kinase Insert Domain Receptor	Protein Coding	P35968	60	GC04M055078	12.8319	https://www.genecards.org/cgi-bin/carddisp.pl?gene=KDR
VHL	Von Hippel-Lindau Tumor Suppressor	Protein Coding	P40337	54	GC03P014626	12.8198	https://www.genecards.org/cgi-bin/carddisp.pl?gene=VHL
TPO	Thyroid Peroxidase	Protein Coding	P07202	55	GC02P001374	12.8195	https://www.genecards.org/cgi-bin/carddisp.pl?gene=TPO
MT-CYB	Mitochondrially Encoded Cytochrome B	Protein Coding	P00156	38	GCMTP014749	12.8064	https://www.genecards.org/cgi-bin/carddisp.pl?gene=MT-CYB
EGFR	Epidermal Growth Factor Receptor	Protein Coding	P00533	62	GC07P055019	12.8018	https://www.genecards.org/cgi-bin/carddisp.pl?gene=EGFR
MRPS25	Mitochondrial Ribosomal Protein S25	Protein Coding	P82663	46	GC03M023377	12.8013	https://www.genecards.org/cgi-bin/carddisp.pl?gene=MRPS25
MT-ND1	Mitochondrially Encoded NADH:Ubiquinone Oxidoreductase Core Subunit 1	Protein Coding	P03886	36	GCMTP003309	12.7908	https://www.genecards.org/cgi-bin/carddisp.pl?gene=MT-ND1
REN	Renin	Protein Coding	P00797	56	GC01M204154	12.7871	https://www.genecards.org/cgi-bin/carddisp.pl?gene=REN
NDUFS2	NADH:Ubiquinone Oxidoreductase Core Subunit S2	Protein Coding	O75306	50	GC01P161197	12.7826	https://www.genecards.org/cgi-bin/carddisp.pl?gene=NDUFS2
NDUFS1	NADH:Ubiquinone Oxidoreductase Core Subunit S1	Protein Coding	P28331	52	GC02M206114	12.7807	https://www.genecards.org/cgi-bin/carddisp.pl?gene=NDUFS1
CRYAB	Crystallin Alpha B	Protein Coding	P02511	53	GC11M111908	12.7786	https://www.genecards.org/cgi-bin/carddisp.pl?gene=CRYAB
TERT	Telomerase Reverse Transcriptase	Protein Coding	O14746	58	GC05M001253	12.7625	https://www.genecards.org/cgi-bin/carddisp.pl?gene=TERT
SLC2A1	Solute Carrier Family 2 Member 1	Protein Coding	P11166	60	GC01M042925	12.7551	https://www.genecards.org/cgi-bin/carddisp.pl?gene=SLC2A1
EP300	E1A Binding Protein P300	Protein Coding	Q09472	60	GC22P052546	12.7484	https://www.genecards.org/cgi-bin/carddisp.pl?gene=EP300
EPHX1	Epoxide Hydrolase 1	Protein Coding	P07099	52	GC01P225810	12.7411	https://www.genecards.org/cgi-bin/carddisp.pl?gene=EPHX1
KRIT1	KRIT1 Ankyrin Repeat Containing	Protein Coding	O00522	49	GC07M092198	12.7397	https://www.genecards.org/cgi-bin/carddisp.pl?gene=KRIT1
TTN	Titin	Protein Coding	Q8WZ42	54	GC02M178525	12.7369	https://www.genecards.org/cgi-bin/carddisp.pl?gene=TTN
PTGIS	Prostaglandin I2 Synthase	Protein Coding	Q16647	52	GC20M049503	12.7079	https://www.genecards.org/cgi-bin/carddisp.pl?gene=PTGIS
DYNLL1	Dynein Light Chain LC8-Type 1	Protein Coding	P63167	49	GC12P120469	12.7029	https://www.genecards.org/cgi-bin/carddisp.pl?gene=DYNLL1
SLC25A4	Solute Carrier Family 25 Member 4	Protein Coding	P12235	56	GC04P185143	12.6867	https://www.genecards.org/cgi-bin/carddisp.pl?gene=SLC25A4
MRPS23	Mitochondrial Ribosomal Protein S23	Protein Coding	Q9Y3D9	45	GC17M057834	12.6673	https://www.genecards.org/cgi-bin/carddisp.pl?gene=MRPS23
MAPK13	Mitogen-Activated Protein Kinase 13	Protein Coding	O15264	53	GC06P104233	12.6609	https://www.genecards.org/cgi-bin/carddisp.pl?gene=MAPK13
NOSTRIN	Nitric Oxide Synthase Trafficking	Protein Coding	Q8IVI9	44	GC02P168786	12.65	https://www.genecards.org/cgi-bin/carddisp.pl?gene=NOSTRIN
HSPD1	Heat Shock Protein Family D (Hsp60) Member 1	Protein Coding	P10809	56	GC02M197486	12.6298	https://www.genecards.org/cgi-bin/carddisp.pl?gene=HSPD1
NDUFV1	NADH:Ubiquinone Oxidoreductase Core Subunit V1	Protein Coding	P49821	52	GC11P073074	12.6158	https://www.genecards.org/cgi-bin/carddisp.pl?gene=NDUFV1
MYC	MYC Proto-Oncogene, BHLH Transcription Factor	Protein Coding	P01106	59	GC08P127735	12.6136	https://www.genecards.org/cgi-bin/carddisp.pl?gene=MYC
ADCYAP1	Adenylate Cyclase Activating Polypeptide 1	Protein Coding	P18509	48	GC18P000895	12.6038	https://www.genecards.org/cgi-bin/carddisp.pl?gene=ADCYAP1
NPPA	Natriuretic Peptide A	Protein Coding	P01160	52	GC01M011846	12.6022	https://www.genecards.org/cgi-bin/carddisp.pl?gene=NPPA
TXNRD2	Thioredoxin Reductase 2	Protein Coding	Q9NNW7	52	GC22M019863	12.5904	https://www.genecards.org/cgi-bin/carddisp.pl?gene=TXNRD2
GCLM	Glutamate-Cysteine Ligase Modifier Subunit	Protein Coding	P48507	48	GC01M093885	12.5534	https://www.genecards.org/cgi-bin/carddisp.pl?gene=GCLM
SUOX	Sulfite Oxidase	Protein Coding	P51687	51	GC12P055997	12.5479	https://www.genecards.org/cgi-bin/carddisp.pl?gene=SUOX
SIRT2	Sirtuin 2	Protein Coding	Q8IXJ6	54	GC19M038878	12.5406	https://www.genecards.org/cgi-bin/carddisp.pl?gene=SIRT2
OXTR	Oxytocin Receptor	Protein Coding	P30559	53	GC03M008767	12.5319	https://www.genecards.org/cgi-bin/carddisp.pl?gene=OXTR
PPP1R15A	Protein Phosphatase 1 Regulatory Subunit 15A	Protein Coding	O75807	46	GC19P048872	12.5213	https://www.genecards.org/cgi-bin/carddisp.pl?gene=PPP1R15A
ALOX5	Arachidonate 5-Lipoxygenase	Protein Coding	P09917	54	GC10P045374	12.5156	https://www.genecards.org/cgi-bin/carddisp.pl?gene=ALOX5
JAK2	Janus Kinase 2	Protein Coding	O60674	60	GC09P004985	12.4926	https://www.genecards.org/cgi-bin/carddisp.pl?gene=JAK2
LONP1	Lon Peptidase 1, Mitochondrial	Protein Coding	P36776	52	GC19M005691	12.4299	https://www.genecards.org/cgi-bin/carddisp.pl?gene=LONP1
MRPS28	Mitochondrial Ribosomal Protein S28	Protein Coding	Q9Y2Q9	46	GC08M079962	12.4239	https://www.genecards.org/cgi-bin/carddisp.pl?gene=MRPS28
BMP6	Bone Morphogenetic Protein 6	Protein Coding	P22004	52	GC06P007726	12.4195	https://www.genecards.org/cgi-bin/carddisp.pl?gene=BMP6
ETFB	Electron Transfer Flavoprotein Subunit Beta	Protein Coding	P38117	50	GC19M051345	12.3628	https://www.genecards.org/cgi-bin/carddisp.pl?gene=ETFB
TIA1	TIA1 Cytotoxic Granule Associated RNA Binding Protein	Protein Coding	P31483	49	GC02M070209	12.3299	https://www.genecards.org/cgi-bin/carddisp.pl?gene=TIA1
CALR	Calreticulin	Protein Coding	P27797	58	GC19P012938	12.3207	https://www.genecards.org/cgi-bin/carddisp.pl?gene=CALR
HP	Haptoglobin	Protein Coding	P00738	52	GC16P073300	12.3194	https://www.genecards.org/cgi-bin/carddisp.pl?gene=HP
HSP90B1	Heat Shock Protein 90 Beta Family Member 1	Protein Coding	P14625	54	GC12P103930	12.3033	https://www.genecards.org/cgi-bin/carddisp.pl?gene=HSP90B1
ADRB2	Adrenoceptor Beta 2	Protein Coding	P07550	55	GC05P148825	12.2962	https://www.genecards.org/cgi-bin/carddisp.pl?gene=ADRB2
MGST1	Microsomal Glutathione S-Transferase 1	Protein Coding	P10620	49	GC12P016347	12.2929	https://www.genecards.org/cgi-bin/carddisp.pl?gene=MGST1
ALDH3A2	Aldehyde Dehydrogenase 3 Family Member A2	Protein Coding	P51648	52	GC17P019648	12.2916	https://www.genecards.org/cgi-bin/carddisp.pl?gene=ALDH3A2
MMP9	Matrix Metallopeptidase 9	Protein Coding	P14780	60	GC20P046008	12.2791	https://www.genecards.org/cgi-bin/carddisp.pl?gene=MMP9
ASL	Argininosuccinate Lyase	Protein Coding	P04424	52	GC07P066075	12.2755	https://www.genecards.org/cgi-bin/carddisp.pl?gene=ASL
MRPS14	Mitochondrial Ribosomal Protein S14	Protein Coding	O60783	43	GC01M175010	12.2537	https://www.genecards.org/cgi-bin/carddisp.pl?gene=MRPS14
CASP8	Caspase 8	Protein Coding	Q14790	59	GC02P201233	12.227	https://www.genecards.org/cgi-bin/carddisp.pl?gene=CASP8
NOSIP	Nitric Oxide Synthase Interacting Protein	Protein Coding	Q9Y314	44	GC19M049555	12.2258	https://www.genecards.org/cgi-bin/carddisp.pl?gene=NOSIP
PGD	Phosphogluconate Dehydrogenase	Protein Coding	P52209	54	GC01P010398	12.2227	https://www.genecards.org/cgi-bin/carddisp.pl?gene=PGD
PRL	Prolactin	Protein Coding	P01236	50	GC06M022287	12.1992	https://www.genecards.org/cgi-bin/carddisp.pl?gene=PRL
EPRS1	Glutamyl-Prolyl-TRNA Synthetase 1	Protein Coding	P07814	50	GC01M219969	12.1913	https://www.genecards.org/cgi-bin/carddisp.pl?gene=EPRS1
SETD2	SET Domain Containing 2, Histone Lysine Methyltransferase	Protein Coding	Q9BYW2	54	GC03M047033	12.1906	https://www.genecards.org/cgi-bin/carddisp.pl?gene=SETD2
CALCA	Calcitonin Related Polypeptide Alpha	Protein Coding	P06881	49	GC11M014966	12.1839	https://www.genecards.org/cgi-bin/carddisp.pl?gene=CALCA
HSD17B10	Hydroxysteroid 17-Beta Dehydrogenase 10	Protein Coding	Q99714	53	GC0XM053431	12.1753	https://www.genecards.org/cgi-bin/carddisp.pl?gene=HSD17B10
NCF1	Neutrophil Cytosolic Factor 1	Protein Coding	P14598	53	GC07P079604	12.1733	https://www.genecards.org/cgi-bin/carddisp.pl?gene=NCF1
EIF4E	Eukaryotic Translation Initiation Factor 4E	Protein Coding	P06730	56	GC04M098879	12.1613	https://www.genecards.org/cgi-bin/carddisp.pl?gene=EIF4E
PRKCZ	Protein Kinase C Zeta	Protein Coding	Q05513	55	GC01P005301	12.1611	https://www.genecards.org/cgi-bin/carddisp.pl?gene=PRKCZ
HYOU1	Hypoxia Up-Regulated 1	Protein Coding	Q9Y4L1	52	GC11M119400	12.1583	https://www.genecards.org/cgi-bin/carddisp.pl?gene=HYOU1
LRRK2	Leucine Rich Repeat Kinase 2	Protein Coding	Q5S007	56	GC12P040196	12.1446	https://www.genecards.org/cgi-bin/carddisp.pl?gene=LRRK2
NFE2L1	NFE2 Like BZIP Transcription Factor 1	Protein Coding	Q14494	50	GC17P078472	12.1247	https://www.genecards.org/cgi-bin/carddisp.pl?gene=NFE2L1
EGF	Epidermal Growth Factor	Protein Coding	P01133	58	GC04P109912	12.0902	https://www.genecards.org/cgi-bin/carddisp.pl?gene=EGF
AKR1A1	Aldo-Keto Reductase Family 1 Member A1	Protein Coding	P14550	52	GC01P045550	12.0853	https://www.genecards.org/cgi-bin/carddisp.pl?gene=AKR1A1
BRCA2	BRCA2 DNA Repair Associated	Protein Coding	P51587	54	GC13P032315	12.0642	https://www.genecards.org/cgi-bin/carddisp.pl?gene=BRCA2
H6PD	Hexose-6-Phosphate Dehydrogenase/Glucose 1-Dehydrogenase	Protein Coding	O95479	50	GC01P009234	12.0475	https://www.genecards.org/cgi-bin/carddisp.pl?gene=H6PD
MAPKAPK3	MAPK Activated Protein Kinase 3	Protein Coding	Q16644	56	GC03P050611	12.03	https://www.genecards.org/cgi-bin/carddisp.pl?gene=MAPKAPK3
MT-ATP6	Mitochondrially Encoded ATP Synthase Membrane Subunit 6	Protein Coding	P00846	39	GCMTP008531	12.0285	https://www.genecards.org/cgi-bin/carddisp.pl?gene=MT-ATP6
CYP2B6	Cytochrome P450 Family 2 Subfamily B Member 6	Protein Coding	P20813	52	GC19P040991	12.0094	https://www.genecards.org/cgi-bin/carddisp.pl?gene=CYP2B6
TNNI3K	TNNI3 Interacting Kinase	Protein Coding	Q59H18	45	GC01P074235	11.976	https://www.genecards.org/cgi-bin/carddisp.pl?gene=TNNI3K
HSPA9	Heat Shock Protein Family A (Hsp70) Member 9	Protein Coding	P38646	54	GC05M138554	11.9592	https://www.genecards.org/cgi-bin/carddisp.pl?gene=HSPA9
CEBPB	CCAAT Enhancer Binding Protein Beta	Protein Coding	P17676	50	GC20P050190	11.9469	https://www.genecards.org/cgi-bin/carddisp.pl?gene=CEBPB
PRKCA	Protein Kinase C Alpha	Protein Coding	P17252	57	GC17P066302	11.9401	https://www.genecards.org/cgi-bin/carddisp.pl?gene=PRKCA
GLRX2	Glutaredoxin 2	Protein Coding	Q9NS18	44	GC01M193065	11.9222	https://www.genecards.org/cgi-bin/carddisp.pl?gene=GLRX2
SIRT6	Sirtuin 6	Protein Coding	Q8N6T7	52	GC19M004174	11.921	https://www.genecards.org/cgi-bin/carddisp.pl?gene=SIRT6
THBS1	Thrombospondin 1	Protein Coding	P07996	52	GC15P039581	11.904	https://www.genecards.org/cgi-bin/carddisp.pl?gene=THBS1
GSS	Glutathione Synthetase	Protein Coding	P48637	53	GC20M034928	11.9036	https://www.genecards.org/cgi-bin/carddisp.pl?gene=GSS
TYR	Tyrosinase	Protein Coding	P14679	55	GC11P089177	11.8944	https://www.genecards.org/cgi-bin/carddisp.pl?gene=TYR
PRKD1	Protein Kinase D1	Protein Coding	Q15139	56	GC14M029576	11.8876	https://www.genecards.org/cgi-bin/carddisp.pl?gene=PRKD1
UQCRFS1	Ubiquinol-Cytochrome C Reductase, Rieske Iron-Sulfur Polypeptide 1	Protein Coding	P47985	53	GC19M029205	11.8339	https://www.genecards.org/cgi-bin/carddisp.pl?gene=UQCRFS1
THBD	Thrombomodulin	Protein Coding	P07204	53	GC20M023026	11.8159	https://www.genecards.org/cgi-bin/carddisp.pl?gene=THBD
IL18	Interleukin 18	Protein Coding	Q14116	50	GC11M112143	11.8073	https://www.genecards.org/cgi-bin/carddisp.pl?gene=IL18
NGB	Neuroglobin	Protein Coding	Q9NPG2	44	GC14M077265	11.7972	https://www.genecards.org/cgi-bin/carddisp.pl?gene=NGB
ADH5	Alcohol Dehydrogenase 5 (Class III), Chi Polypeptide	Protein Coding	P11766	53	GC04M099070	11.7515	https://www.genecards.org/cgi-bin/carddisp.pl?gene=ADH5
VIP	Vasoactive Intestinal Peptide	Protein Coding	P01282	51	GC06P152750	11.7499	https://www.genecards.org/cgi-bin/carddisp.pl?gene=VIP
ARG1	Arginase 1	Protein Coding	P05089	56	GC06P131473	11.7354	https://www.genecards.org/cgi-bin/carddisp.pl?gene=ARG1
TAMM41	TAM41 Mitochondrial Translocator Assembly And Maintenance Homolog	Protein Coding	Q96BW9	43	GC03M011721	11.7165	https://www.genecards.org/cgi-bin/carddisp.pl?gene=TAMM41
FMO5	Flavin Containing Dimethylaniline Monoxygenase 5	Protein Coding	P49326	48	GC01M147175	11.6983	https://www.genecards.org/cgi-bin/carddisp.pl?gene=FMO5
ARG2	Arginase 2	Protein Coding	P78540	52	GC14P067619	11.6905	https://www.genecards.org/cgi-bin/carddisp.pl?gene=ARG2
DUSP1	Dual Specificity Phosphatase 1	Protein Coding	P28562	52	GC05M172768	11.6786	https://www.genecards.org/cgi-bin/carddisp.pl?gene=DUSP1
PTK2B	Protein Tyrosine Kinase 2 Beta	Protein Coding	Q14289	56	GC08P027311	11.6732	https://www.genecards.org/cgi-bin/carddisp.pl?gene=PTK2B
RPS27A	Ribosomal Protein S27a	Protein Coding	P62979	49	GC02P055231	11.6681	https://www.genecards.org/cgi-bin/carddisp.pl?gene=RPS27A
GSK3B	Glycogen Synthase Kinase 3 Beta	Protein Coding	P49841	57	GC03M119821	11.6647	https://www.genecards.org/cgi-bin/carddisp.pl?gene=GSK3B
PIK3CA	Phosphatidylinositol-4,5-Bisphosphate 3-Kinase Catalytic Subunit Alpha	Protein Coding	P42336	59	GC03P179148	11.6613	https://www.genecards.org/cgi-bin/carddisp.pl?gene=PIK3CA
ASS1	Argininosuccinate Synthase 1	Protein Coding	P00966	56	GC09P130444	11.6348	https://www.genecards.org/cgi-bin/carddisp.pl?gene=ASS1
OGDH	Oxoglutarate Dehydrogenase	Protein Coding	Q02218	53	GC07P044606	11.6318	https://www.genecards.org/cgi-bin/carddisp.pl?gene=OGDH
BCL2L11	BCL2 Like 11	Protein Coding	O43521	52	GC02P111119	11.6199	https://www.genecards.org/cgi-bin/carddisp.pl?gene=BCL2L11
CHAT	Choline O-Acetyltransferase	Protein Coding	P28329	55	GC10P049609	11.6055	https://www.genecards.org/cgi-bin/carddisp.pl?gene=CHAT
GJA1	Gap Junction Protein Alpha 1	Protein Coding	P17302	57	GC06P121436	11.5985	https://www.genecards.org/cgi-bin/carddisp.pl?gene=GJA1
DRD2	Dopamine Receptor D2	Protein Coding	P14416	56	GC11M113409	11.5242	https://www.genecards.org/cgi-bin/carddisp.pl?gene=DRD2
STUB1	STIP1 Homology And U-Box Containing Protein 1	Protein Coding	Q9UNE7	52	GC16P021377	11.4808	https://www.genecards.org/cgi-bin/carddisp.pl?gene=STUB1
GHRL	Ghrelin And Obestatin Prepropeptide	Protein Coding	Q9UBU3	48	GC03M010285	11.4747	https://www.genecards.org/cgi-bin/carddisp.pl?gene=GHRL
ATR	ATR Serine/Threonine Kinase	Protein Coding	Q13535	60	GC03M142449	11.4498	https://www.genecards.org/cgi-bin/carddisp.pl?gene=ATR
AKR1B1	Aldo-Keto Reductase Family 1 Member B	Protein Coding	P15121	53	GC07M134442	11.4169	https://www.genecards.org/cgi-bin/carddisp.pl?gene=AKR1B1
SMPD1	Sphingomyelin Phosphodiesterase 1	Protein Coding	P17405	56	GC11P006390	11.4127	https://www.genecards.org/cgi-bin/carddisp.pl?gene=SMPD1
PRKAB1	Protein Kinase AMP-Activated Non-Catalytic Subunit Beta 1	Protein Coding	Q9Y478	54	GC12P119632	11.3878	https://www.genecards.org/cgi-bin/carddisp.pl?gene=PRKAB1
NTHL1	Nth Like DNA Glycosylase 1	Protein Coding	P78549	50	GC16M010451	11.3862	https://www.genecards.org/cgi-bin/carddisp.pl?gene=NTHL1
PRKG1	Protein Kinase CGMP-Dependent 1	Protein Coding	Q13976	57	GC10P050991	11.3835	https://www.genecards.org/cgi-bin/carddisp.pl?gene=PRKG1
EEF1A1	Eukaryotic Translation Elongation Factor 1 Alpha 1	Protein Coding	P68104	51	GC06M081489	11.3636	https://www.genecards.org/cgi-bin/carddisp.pl?gene=EEF1A1
NPPB	Natriuretic Peptide B	Protein Coding	P16860	50	GC01M011858	11.3483	https://www.genecards.org/cgi-bin/carddisp.pl?gene=NPPB
SPG7	SPG7 Matrix AAA Peptidase Subunit, Paraplegin	Protein Coding	Q9UQ90	51	GC16P092015	11.324	https://www.genecards.org/cgi-bin/carddisp.pl?gene=SPG7
CRLS1	Cardiolipin Synthase 1	Protein Coding	Q9UJA2	47	GC20P006005	11.3074	https://www.genecards.org/cgi-bin/carddisp.pl?gene=CRLS1
ABCC1	ATP Binding Cassette Subfamily C Member 1	Protein Coding	P33527	55	GC16P015949	11.2998	https://www.genecards.org/cgi-bin/carddisp.pl?gene=ABCC1
ACP1	Acid Phosphatase 1	Protein Coding	P24666	50	GC02P000491	11.2415	https://www.genecards.org/cgi-bin/carddisp.pl?gene=ACP1
MAPK12	Mitogen-Activated Protein Kinase 12	Protein Coding	P53778	54	GC22M068329	11.237	https://www.genecards.org/cgi-bin/carddisp.pl?gene=MAPK12
CYP11B2	Cytochrome P450 Family 11 Subfamily B Member 2	Protein Coding	P19099	53	GC08M142910	11.2338	https://www.genecards.org/cgi-bin/carddisp.pl?gene=CYP11B2
FPGT-TNNI3K	FPGT-TNNI3K Readthrough	Protein Coding		23	GC01P074198	11.2313	https://www.genecards.org/cgi-bin/carddisp.pl?gene=FPGT-TNNI3K
BAK1	BCL2 Antagonist/Killer 1	Protein Coding	Q16611	52	GC06M033572	11.2292	https://www.genecards.org/cgi-bin/carddisp.pl?gene=BAK1
NRF1	Nuclear Respiratory Factor 1	Protein Coding	Q16656	50	GC07P129611	11.2074	https://www.genecards.org/cgi-bin/carddisp.pl?gene=NRF1
HTRA2	HtrA Serine Peptidase 2	Protein Coding	O43464	53	GC02P074529	11.1935	https://www.genecards.org/cgi-bin/carddisp.pl?gene=HTRA2
APOB	Apolipoprotein B	Protein Coding	P04114	53	GC02M020956	11.1924	https://www.genecards.org/cgi-bin/carddisp.pl?gene=APOB
BMP2	Bone Morphogenetic Protein 2	Protein Coding	P12643	53	GC20P006767	11.1887	https://www.genecards.org/cgi-bin/carddisp.pl?gene=BMP2
NFKBIA	NFKB Inhibitor Alpha	Protein Coding	P25963	57	GC14M035401	11.1732	https://www.genecards.org/cgi-bin/carddisp.pl?gene=NFKBIA
SLC7A11	Solute Carrier Family 7 Member 11	Protein Coding	Q9UPY5	51	GC04M138164	11.1177	https://www.genecards.org/cgi-bin/carddisp.pl?gene=SLC7A11
ECHS1	Enoyl-CoA Hydratase, Short Chain 1	Protein Coding	P30084	52	GC10M133362	11.0982	https://www.genecards.org/cgi-bin/carddisp.pl?gene=ECHS1
SLC6A3	Solute Carrier Family 6 Member 3	Protein Coding	Q01959	57	GC05M001392	11.0847	https://www.genecards.org/cgi-bin/carddisp.pl?gene=SLC6A3
HSPA1B	Heat Shock Protein Family A (Hsp70) Member 1B	Protein Coding	P0DMV9	46	GC06P104116	11.0806	https://www.genecards.org/cgi-bin/carddisp.pl?gene=HSPA1B
WARS2	Tryptophanyl TRNA Synthetase 2, Mitochondrial	Protein Coding	Q9UGM6	52	GC01M119031	11.0732	https://www.genecards.org/cgi-bin/carddisp.pl?gene=WARS2
UCP1	Uncoupling Protein 1	Protein Coding	P25874	49	GC04M140559	11.0701	https://www.genecards.org/cgi-bin/carddisp.pl?gene=UCP1
SDHC	Succinate Dehydrogenase Complex Subunit C	Protein Coding	Q99643	50	GC01P161314	11.0551	https://www.genecards.org/cgi-bin/carddisp.pl?gene=SDHC
BCKDHB	Branched Chain Keto Acid Dehydrogenase E1 Subunit Beta	Protein Coding	P21953	50	GC06P080106	11.0381	https://www.genecards.org/cgi-bin/carddisp.pl?gene=BCKDHB
EGR1	Early Growth Response 1	Protein Coding	P18146	51	GC05P138465	11.0328	https://www.genecards.org/cgi-bin/carddisp.pl?gene=EGR1
FMO2	Flavin Containing Dimethylaniline Monoxygenase 2	Protein Coding	Q99518	45	GC01P171185	11.0149	https://www.genecards.org/cgi-bin/carddisp.pl?gene=FMO2
TLR2	Toll Like Receptor 2	Protein Coding	O60603	58	GC04P153684	10.9907	https://www.genecards.org/cgi-bin/carddisp.pl?gene=TLR2
HFE	Homeostatic Iron Regulator	Protein Coding	Q30201	52	GC06P026087	10.9845	https://www.genecards.org/cgi-bin/carddisp.pl?gene=HFE
ERO1A	Endoplasmic Reticulum Oxidoreductase 1 Alpha	Protein Coding	Q96HE7	49	GC14M052640	10.9701	https://www.genecards.org/cgi-bin/carddisp.pl?gene=ERO1A
CFTR	CF Transmembrane Conductance Regulator	Protein Coding	P13569	58	GC07P117287	10.963	https://www.genecards.org/cgi-bin/carddisp.pl?gene=CFTR
TTR	Transthyretin	Protein Coding	P02766	55	GC18P031557	10.9344	https://www.genecards.org/cgi-bin/carddisp.pl?gene=TTR
SCARA3	Scavenger Receptor Class A Member 3	Protein Coding	Q6AZY7	44	GC08P027633	10.9338	https://www.genecards.org/cgi-bin/carddisp.pl?gene=SCARA3
HTR1A	5-Hydroxytryptamine Receptor 1A	Protein Coding	P08908	53	GC05M063960	10.9125	https://www.genecards.org/cgi-bin/carddisp.pl?gene=HTR1A
FN1	Fibronectin 1	Protein Coding	P02751	57	GC02M215360	10.8563	https://www.genecards.org/cgi-bin/carddisp.pl?gene=FN1
DDAH1	Dimethylarginine Dimethylaminohydrolase 1	Protein Coding	O94760	49	GC01M085318	10.8264	https://www.genecards.org/cgi-bin/carddisp.pl?gene=DDAH1
CDKN3	Cyclin Dependent Kinase Inhibitor 3	Protein Coding	Q16667	48	GC14P054398	10.8211	https://www.genecards.org/cgi-bin/carddisp.pl?gene=CDKN3
ERCC8	ERCC Excision Repair 8, CSA Ubiquitin Ligase Complex Subunit	Protein Coding	Q13216	50	GC05M060905	10.818	https://www.genecards.org/cgi-bin/carddisp.pl?gene=ERCC8
CDK2	Cyclin Dependent Kinase 2	Protein Coding	P24941	58	GC12P055966	10.8176	https://www.genecards.org/cgi-bin/carddisp.pl?gene=CDK2
CBS	Cystathionine Beta-Synthase	Protein Coding	P35520	57	GC21M043053	10.8169	https://www.genecards.org/cgi-bin/carddisp.pl?gene=CBS
CUL3	Cullin 3	Protein Coding	Q13618	55	GC02M224470	10.8111	https://www.genecards.org/cgi-bin/carddisp.pl?gene=CUL3
STK4	Serine/Threonine Kinase 4	Protein Coding	Q13043	56	GC20P044966	10.8031	https://www.genecards.org/cgi-bin/carddisp.pl?gene=STK4
NDUFS7	NADH:Ubiquinone Oxidoreductase Core Subunit S7	Protein Coding	O75251	52	GC19P005631	10.7924	https://www.genecards.org/cgi-bin/carddisp.pl?gene=NDUFS7
GLO1	Glyoxalase I	Protein Coding	Q04760	51	GC06M081074	10.755	https://www.genecards.org/cgi-bin/carddisp.pl?gene=GLO1
CTNNB1	Catenin Beta 1	Protein Coding	P35222	60	GC03P041194	10.7199	https://www.genecards.org/cgi-bin/carddisp.pl?gene=CTNNB1
ATP13A2	ATPase Cation Transporting 13A2	Protein Coding	Q9NQ11	52	GC01M016985	10.7192	https://www.genecards.org/cgi-bin/carddisp.pl?gene=ATP13A2
NDUFB9	NADH:Ubiquinone Oxidoreductase Subunit B9	Protein Coding	Q9Y6M9	50	GC08P124539	10.7179	https://www.genecards.org/cgi-bin/carddisp.pl?gene=NDUFB9
INSR	Insulin Receptor	Protein Coding	P06213	61	GC19M007112	10.7153	https://www.genecards.org/cgi-bin/carddisp.pl?gene=INSR
SCP2	Sterol Carrier Protein 2	Protein Coding	P22307	52	GC01P052927	10.7108	https://www.genecards.org/cgi-bin/carddisp.pl?gene=SCP2
PAH	Phenylalanine Hydroxylase	Protein Coding	P00439	54	GC12M102836	10.6811	https://www.genecards.org/cgi-bin/carddisp.pl?gene=PAH
LPO	Lactoperoxidase	Protein Coding	P22079	47	GC17P058218	10.6803	https://www.genecards.org/cgi-bin/carddisp.pl?gene=LPO
PTPN1	Protein Tyrosine Phosphatase Non-Receptor Type 1	Protein Coding	P18031	57	GC20P050510	10.6802	https://www.genecards.org/cgi-bin/carddisp.pl?gene=PTPN1
BCS1L	BCS1 Homolog, Ubiquinol-Cytochrome C Reductase Complex Chaperone	Protein Coding	Q9Y276	51	GC02P218658	10.6751	https://www.genecards.org/cgi-bin/carddisp.pl?gene=BCS1L
ADM	Adrenomedullin	Protein Coding	P35318	52	GC11P010304	10.6692	https://www.genecards.org/cgi-bin/carddisp.pl?gene=ADM
CNR1	Cannabinoid Receptor 1	Protein Coding	P21554	53	GC06M088139	10.6624	https://www.genecards.org/cgi-bin/carddisp.pl?gene=CNR1
NDUFAF2	NADH:Ubiquinone Oxidoreductase Complex Assembly Factor 2	Protein Coding	Q8N183	48	GC05P060945	10.6481	https://www.genecards.org/cgi-bin/carddisp.pl?gene=NDUFAF2
ISCU	Iron-Sulfur Cluster Assembly Enzyme	Protein Coding	Q9H1K1	52	GC12P108561	10.5906	https://www.genecards.org/cgi-bin/carddisp.pl?gene=ISCU
FOXO4	Forkhead Box O4	Protein Coding	P98177	48	GC0XP071095	10.5701	https://www.genecards.org/cgi-bin/carddisp.pl?gene=FOXO4
TRAF2	TNF Receptor Associated Factor 2	Protein Coding	Q12933	52	GC09P136881	10.5679	https://www.genecards.org/cgi-bin/carddisp.pl?gene=TRAF2
NDUFA6	NADH:Ubiquinone Oxidoreductase Subunit A6	Protein Coding	P56556	50	GC22M042085	10.5455	https://www.genecards.org/cgi-bin/carddisp.pl?gene=NDUFA6
CHUK	Component Of Inhibitor Of Nuclear Factor Kappa B Kinase Complex	Protein Coding	O15111	57	GC10M100296	10.5426	https://www.genecards.org/cgi-bin/carddisp.pl?gene=CHUK
GSTM3	Glutathione S-Transferase Mu 3	Protein Coding	P21266	53	GC01M109733	10.5391	https://www.genecards.org/cgi-bin/carddisp.pl?gene=GSTM3
CRAT	Carnitine O-Acetyltransferase	Protein Coding	P43155	52	GC09M129094	10.5362	https://www.genecards.org/cgi-bin/carddisp.pl?gene=CRAT
ALDH1A1	Aldehyde Dehydrogenase 1 Family Member A1	Protein Coding	P00352	54	GC09M072900	10.5359	https://www.genecards.org/cgi-bin/carddisp.pl?gene=ALDH1A1
TNFRSF1A	TNF Receptor Superfamily Member 1A	Protein Coding	P19438	57	GC12M006328	10.5047	https://www.genecards.org/cgi-bin/carddisp.pl?gene=TNFRSF1A
DLG4	Discs Large MAGUK Scaffold Protein 4	Protein Coding	P78352	54	GC17M013488	10.4882	https://www.genecards.org/cgi-bin/carddisp.pl?gene=DLG4
FAM120A	Family With Sequence Similarity 120A	Protein Coding	Q9NZB2	45	GC09P095036	10.4631	https://www.genecards.org/cgi-bin/carddisp.pl?gene=FAM120A
PRNP	Prion Protein	Protein Coding	F7VJQ1	55	GC20P004686	10.4573	https://www.genecards.org/cgi-bin/carddisp.pl?gene=PRNP
DLD	Dihydrolipoamide Dehydrogenase	Protein Coding	P09622	56	GC07P107890	10.4496	https://www.genecards.org/cgi-bin/carddisp.pl?gene=DLD
NEIL1	Nei Like DNA Glycosylase 1	Protein Coding	Q96FI4	45	GC15P075346	10.4384	https://www.genecards.org/cgi-bin/carddisp.pl?gene=NEIL1
CYC1	Cytochrome C1	Protein Coding	P08574	52	GC08P144095	10.4067	https://www.genecards.org/cgi-bin/carddisp.pl?gene=CYC1
ALDH9A1	Aldehyde Dehydrogenase 9 Family Member A1	Protein Coding	P49189	49	GC01M165684	10.3954	https://www.genecards.org/cgi-bin/carddisp.pl?gene=ALDH9A1
SLC22A5	Solute Carrier Family 22 Member 5	Protein Coding	O76082	53	GC05P132369	10.3855	https://www.genecards.org/cgi-bin/carddisp.pl?gene=SLC22A5
FDXR	Ferredoxin Reductase	Protein Coding	P22570	50	GC17M074862	10.3853	https://www.genecards.org/cgi-bin/carddisp.pl?gene=FDXR
CRHR2	Corticotropin Releasing Hormone Receptor 2	Protein Coding	Q13324	50	GC07M030651	10.3484	https://www.genecards.org/cgi-bin/carddisp.pl?gene=CRHR2
EIF2B5	Eukaryotic Translation Initiation Factor 2B Subunit Epsilon	Protein Coding	Q13144	50	GC03P184135	10.3397	https://www.genecards.org/cgi-bin/carddisp.pl?gene=EIF2B5
CREBBP	CREB Binding Protein	Protein Coding	Q92793	61	GC16M010660	10.3373	https://www.genecards.org/cgi-bin/carddisp.pl?gene=CREBBP
AOC3	Amine Oxidase Copper Containing 3	Protein Coding	Q16853	52	GC17P042851	10.3249	https://www.genecards.org/cgi-bin/carddisp.pl?gene=AOC3
GBA1	Glucosylceramidase Beta 1	Protein Coding	P04062	56	GC01M156443	10.3149	https://www.genecards.org/cgi-bin/carddisp.pl?gene=GBA1
HCRT	Hypocretin Neuropeptide Precursor	Protein Coding	O43612	46	GC17M060853	10.3081	https://www.genecards.org/cgi-bin/carddisp.pl?gene=HCRT
PTK2	Protein Tyrosine Kinase 2	Protein Coding	Q05397	54	GC08M140657	10.3018	https://www.genecards.org/cgi-bin/carddisp.pl?gene=PTK2
LDHA	Lactate Dehydrogenase A	Protein Coding	P00338	57	GC11P018394	10.2889	https://www.genecards.org/cgi-bin/carddisp.pl?gene=LDHA
TECRL	Trans-2,3-Enoyl-CoA Reductase Like	Protein Coding	Q5HYJ1	44	GC04M064275	10.2813	https://www.genecards.org/cgi-bin/carddisp.pl?gene=TECRL
MIEF2	Mitochondrial Elongation Factor 2	Protein Coding	Q96C03	42	GC17P076034	10.275	https://www.genecards.org/cgi-bin/carddisp.pl?gene=MIEF2
MT-CO2	Mitochondrially Encoded Cytochrome C Oxidase II	Protein Coding	P00403	40	GCMTP007587	10.2687	https://www.genecards.org/cgi-bin/carddisp.pl?gene=MT-CO2
DAXX	Death Domain Associated Protein	Protein Coding	Q9UER7	50	GC06M033318	10.2687	https://www.genecards.org/cgi-bin/carddisp.pl?gene=DAXX
SCN4B	Sodium Voltage-Gated Channel Beta Subunit 4	Protein Coding	Q8IWT1	51	GC11M118134	10.2583	https://www.genecards.org/cgi-bin/carddisp.pl?gene=SCN4B
SST	Somatostatin	Protein Coding	P61278	47	GC03M187668	10.2441	https://www.genecards.org/cgi-bin/carddisp.pl?gene=SST
HBA1	Hemoglobin Subunit Alpha 1	Protein Coding	P69905	49	GC16P021338	10.2378	https://www.genecards.org/cgi-bin/carddisp.pl?gene=HBA1
SESN1	Sestrin 1	Protein Coding	Q9Y6P5	46	GC06M108986	10.2291	https://www.genecards.org/cgi-bin/carddisp.pl?gene=SESN1
AR	Androgen Receptor	Protein Coding	P10275	58	GC0XP067544	10.2237	https://www.genecards.org/cgi-bin/carddisp.pl?gene=AR
CYP27A1	Cytochrome P450 Family 27 Subfamily A Member 1	Protein Coding	Q02318	53	GC02P218781	10.2226	https://www.genecards.org/cgi-bin/carddisp.pl?gene=CYP27A1
IDH1	Isocitrate Dehydrogenase (NADP(+)) 1	Protein Coding	O75874	60	GC02M208236	10.2144	https://www.genecards.org/cgi-bin/carddisp.pl?gene=IDH1
CYP2A6	Cytochrome P450 Family 2 Subfamily A Member 6	Protein Coding	P11509	53	GC19M040843	10.2131	https://www.genecards.org/cgi-bin/carddisp.pl?gene=CYP2A6
NDUFS3	NADH:Ubiquinone Oxidoreductase Core Subunit S3	Protein Coding	O75489	52	GC11P047569	10.2086	https://www.genecards.org/cgi-bin/carddisp.pl?gene=NDUFS3
MT-ND6	Mitochondrially Encoded NADH:Ubiquinone Oxidoreductase Core Subunit 6	Protein Coding	P03923	37	GCMTM014151	10.1854	https://www.genecards.org/cgi-bin/carddisp.pl?gene=MT-ND6
PTPN11	Protein Tyrosine Phosphatase Non-Receptor Type 11	Protein Coding	Q06124	61	GC12P112418	10.1764	https://www.genecards.org/cgi-bin/carddisp.pl?gene=PTPN11
IL2	Interleukin 2	Protein Coding	P60568	52	GC04M122451	10.1739	https://www.genecards.org/cgi-bin/carddisp.pl?gene=IL2
GADD45A	Growth Arrest And DNA Damage Inducible Alpha	Protein Coding	P24522	50	GC01P067685	10.1626	https://www.genecards.org/cgi-bin/carddisp.pl?gene=GADD45A
CDC42	Cell Division Cycle 42	Protein Coding	P60953	58	GC01P022052	10.155	https://www.genecards.org/cgi-bin/carddisp.pl?gene=CDC42
BAD	BCL2 Associated Agonist Of Cell Death	Protein Coding	Q92934	50	GC11M109178	10.1549	https://www.genecards.org/cgi-bin/carddisp.pl?gene=BAD
HRAS	HRas Proto-Oncogene, GTPase	Protein Coding	P01112	59	GC11M007933	10.1397	https://www.genecards.org/cgi-bin/carddisp.pl?gene=HRAS
AHSP	Alpha Hemoglobin Stabilizing Protein	Protein Coding	Q9NZD4	42	GC16P031527	10.1318	https://www.genecards.org/cgi-bin/carddisp.pl?gene=AHSP
IRS1	Insulin Receptor Substrate 1	Protein Coding	P35568	54	GC02M226731	10.1213	https://www.genecards.org/cgi-bin/carddisp.pl?gene=IRS1
MT-ND4	Mitochondrially Encoded NADH:Ubiquinone Oxidoreductase Core Subunit 4	Protein Coding	P03905	38	GCMTP010762	10.1109	https://www.genecards.org/cgi-bin/carddisp.pl?gene=MT-ND4
TPH1	Tryptophan Hydroxylase 1	Protein Coding	P17752	52	GC11M018040	10.1045	https://www.genecards.org/cgi-bin/carddisp.pl?gene=TPH1
XRCC1	X-Ray Repair Cross Complementing 1	Protein Coding	P18887	51	GC19M043543	10.1019	https://www.genecards.org/cgi-bin/carddisp.pl?gene=XRCC1
MT-ND3	Mitochondrially Encoded NADH:Ubiquinone Oxidoreductase Core Subunit 3	Protein Coding	P03897	38	GCMTP010061	10.097	https://www.genecards.org/cgi-bin/carddisp.pl?gene=MT-ND3
CDKN1B	Cyclin Dependent Kinase Inhibitor 1B	Protein Coding	P46527	56	GC12P028528	10.0952	https://www.genecards.org/cgi-bin/carddisp.pl?gene=CDKN1B
COX4I1	Cytochrome C Oxidase Subunit 4I1	Protein Coding	P13073	53	GC16P085798	10.0918	https://www.genecards.org/cgi-bin/carddisp.pl?gene=COX4I1
MT-CO3	Mitochondrially Encoded Cytochrome C Oxidase III	Protein Coding	P00414	36	GCMTP009209	10.0859	https://www.genecards.org/cgi-bin/carddisp.pl?gene=MT-CO3
RELA	RELA Proto-Oncogene, NF-KB Subunit	Protein Coding	Q04206	58	GC11M065653	10.0832	https://www.genecards.org/cgi-bin/carddisp.pl?gene=RELA
GCDH	Glutaryl-CoA Dehydrogenase	Protein Coding	Q92947	52	GC19P012891	10.0742	https://www.genecards.org/cgi-bin/carddisp.pl?gene=GCDH
CLEC4A	C-Type Lectin Domain Family 4 Member A	Protein Coding	Q9UMR7	46	GC12P028350	10.0742	https://www.genecards.org/cgi-bin/carddisp.pl?gene=CLEC4A
UGT1A1	UDP Glucuronosyltransferase Family 1 Member A1	Protein Coding	P22309	57	GC02P233760	10.0706	https://www.genecards.org/cgi-bin/carddisp.pl?gene=UGT1A1
FMO4	Flavin Containing Dimethylaniline Monoxygenase 4	Protein Coding	P31512	46	GC01P171315	10.0517	https://www.genecards.org/cgi-bin/carddisp.pl?gene=FMO4
PLA2G6	Phospholipase A2 Group VI	Protein Coding	O60733	54	GC22M069811	10.0259	https://www.genecards.org/cgi-bin/carddisp.pl?gene=PLA2G6
MTR	5-Methyltetrahydrofolate-Homocysteine Methyltransferase	Protein Coding	Q99707	54	GC01P236795	10.0237	https://www.genecards.org/cgi-bin/carddisp.pl?gene=MTR
KCNMA1	Potassium Calcium-Activated Channel Subfamily M Alpha 1	Protein Coding	Q12791	56	GC10M076869	10.0152	https://www.genecards.org/cgi-bin/carddisp.pl?gene=KCNMA1
MYH7	Myosin Heavy Chain 7	Protein Coding	P12883	53	GC14M023412	9.97888	https://www.genecards.org/cgi-bin/carddisp.pl?gene=MYH7
CAMK2G	Calcium/Calmodulin Dependent Protein Kinase II Gamma	Protein Coding	Q13555	54	GC10M073812	9.97779	https://www.genecards.org/cgi-bin/carddisp.pl?gene=CAMK2G
SGK1	Serum/Glucocorticoid Regulated Kinase 1	Protein Coding	O00141	56	GC06M134169	9.96639	https://www.genecards.org/cgi-bin/carddisp.pl?gene=SGK1
CHEK1	Checkpoint Kinase 1	Protein Coding	O14757	57	GC11P125625	9.95412	https://www.genecards.org/cgi-bin/carddisp.pl?gene=CHEK1
PPARD	Peroxisome Proliferator Activated Receptor Delta	Protein Coding	Q03181	52	GC06P104219	9.93165	https://www.genecards.org/cgi-bin/carddisp.pl?gene=PPARD
DSPP	Dentin Sialophosphoprotein	Protein Coding	Q9NZW4	46	GC04P087608	9.92315	https://www.genecards.org/cgi-bin/carddisp.pl?gene=DSPP
CTSB	Cathepsin B	Protein Coding	P07858	58	GC08M011842	9.88987	https://www.genecards.org/cgi-bin/carddisp.pl?gene=CTSB
AKAP9	A-Kinase Anchoring Protein 9	Protein Coding	Q99996	49	GC07P091940	9.88166	https://www.genecards.org/cgi-bin/carddisp.pl?gene=AKAP9
DSP	Desmoplakin	Protein Coding	P15924	57	GC06P007541	9.87965	https://www.genecards.org/cgi-bin/carddisp.pl?gene=DSP
SMAD3	SMAD Family Member 3	Protein Coding	P84022	60	GC15P067063	9.87133	https://www.genecards.org/cgi-bin/carddisp.pl?gene=SMAD3
PDHA1	Pyruvate Dehydrogenase E1 Subunit Alpha 1	Protein Coding	P08559	54	GC0XP019343	9.86797	https://www.genecards.org/cgi-bin/carddisp.pl?gene=PDHA1
MMP1	Matrix Metallopeptidase 1	Protein Coding	P03956	57	GC11M109978	9.86507	https://www.genecards.org/cgi-bin/carddisp.pl?gene=MMP1
IKBKB	Inhibitor Of Nuclear Factor Kappa B Kinase Subunit Beta	Protein Coding	O14920	61	GC08P042271	9.84961	https://www.genecards.org/cgi-bin/carddisp.pl?gene=IKBKB
GUCY1A1	Guanylate Cyclase 1 Soluble Subunit Alpha 1	Protein Coding	Q02108	50	GC04P155667	9.83616	https://www.genecards.org/cgi-bin/carddisp.pl?gene=GUCY1A1
EDNRA	Endothelin Receptor Type A	Protein Coding	P25101	56	GC04P147480	9.82208	https://www.genecards.org/cgi-bin/carddisp.pl?gene=EDNRA
ELAVL1	ELAV Like RNA Binding Protein 1	Protein Coding	Q15717	48	GC19M007958	9.8132	https://www.genecards.org/cgi-bin/carddisp.pl?gene=ELAVL1
NDUFS6	NADH:Ubiquinone Oxidoreductase Subunit S6	Protein Coding	O75380	50	GC05P001801	9.81305	https://www.genecards.org/cgi-bin/carddisp.pl?gene=NDUFS6
CCND1	Cyclin D1	Protein Coding	P24385	60	GC11P069641	9.81158	https://www.genecards.org/cgi-bin/carddisp.pl?gene=CCND1
NDUFV2	NADH:Ubiquinone Oxidoreductase Core Subunit V2	Protein Coding	P19404	50	GC18P009092	9.80507	https://www.genecards.org/cgi-bin/carddisp.pl?gene=NDUFV2
HSP90AB1	Heat Shock Protein 90 Alpha Family Class B Member 1	Protein Coding	P08238	56	GC06P044246	9.79492	https://www.genecards.org/cgi-bin/carddisp.pl?gene=HSP90AB1
NDUFB10	NADH:Ubiquinone Oxidoreductase Subunit B10	Protein Coding	O96000	50	GC16P045938	9.77583	https://www.genecards.org/cgi-bin/carddisp.pl?gene=NDUFB10
IL1RN	Interleukin 1 Receptor Antagonist	Protein Coding	P18510	57	GC02P125995	9.77112	https://www.genecards.org/cgi-bin/carddisp.pl?gene=IL1RN
MMUT	Methylmalonyl-CoA Mutase	Protein Coding	P22033	53	GC06M049430	9.76091	https://www.genecards.org/cgi-bin/carddisp.pl?gene=MMUT
ACO2	Aconitase 2	Protein Coding	Q99798	53	GC22P052570	9.74469	https://www.genecards.org/cgi-bin/carddisp.pl?gene=ACO2
JUNB	JunB Proto-Oncogene, AP-1 Transcription Factor Subunit	Protein Coding	P17275	48	GC19P012791	9.74151	https://www.genecards.org/cgi-bin/carddisp.pl?gene=JUNB
E2F1	E2F Transcription Factor 1	Protein Coding	Q01094	50	GC20M033675	9.73493	https://www.genecards.org/cgi-bin/carddisp.pl?gene=E2F1
SCO2	Synthesis Of Cytochrome C Oxidase 2	Protein Coding	O43819	51	GC22M050523	9.73456	https://www.genecards.org/cgi-bin/carddisp.pl?gene=SCO2
FASLG	Fas Ligand	Protein Coding	P48023	55	GC01P172659	9.7204	https://www.genecards.org/cgi-bin/carddisp.pl?gene=FASLG
STAT1	Signal Transducer And Activator Of Transcription 1	Protein Coding	P42224	60	GC02M190908	9.71242	https://www.genecards.org/cgi-bin/carddisp.pl?gene=STAT1
PLAT	Plasminogen Activator, Tissue Type	Protein Coding	P00750	56	GC08M042174	9.7043	https://www.genecards.org/cgi-bin/carddisp.pl?gene=PLAT
CDK5	Cyclin Dependent Kinase 5	Protein Coding	Q00535	60	GC07M151053	9.69008	https://www.genecards.org/cgi-bin/carddisp.pl?gene=CDK5
CASP2	Caspase 2	Protein Coding	P42575	53	GC07P152183	9.68892	https://www.genecards.org/cgi-bin/carddisp.pl?gene=CASP2
PNKD	PNKD Metallo-Beta-Lactamase Domain Containing	Protein Coding	Q8N490	48	GC02P218270	9.68303	https://www.genecards.org/cgi-bin/carddisp.pl?gene=PNKD
PTS	6-Pyruvoyltetrahydropterin Synthase	Protein Coding	Q03393	52	GC11P112226	9.67295	https://www.genecards.org/cgi-bin/carddisp.pl?gene=PTS
MMP3	Matrix Metallopeptidase 3	Protein Coding	P08254	56	GC11M102835	9.66696	https://www.genecards.org/cgi-bin/carddisp.pl?gene=MMP3
GPT	Glutamic--Pyruvic Transaminase	Protein Coding	P24298	48	GC08P144502	9.6457	https://www.genecards.org/cgi-bin/carddisp.pl?gene=GPT
MICB	MHC Class I Polypeptide-Related Sequence B	Protein Coding	Q29980	47	GC06P104093	9.64403	https://www.genecards.org/cgi-bin/carddisp.pl?gene=MICB
CYP2C8	Cytochrome P450 Family 2 Subfamily C Member 8	Protein Coding	P10632	53	GC10M095038	9.64393	https://www.genecards.org/cgi-bin/carddisp.pl?gene=CYP2C8
BACE1	Beta-Secretase 1	Protein Coding	P56817	54	GC11M117285	9.63304	https://www.genecards.org/cgi-bin/carddisp.pl?gene=BACE1
BCHE	Butyrylcholinesterase	Protein Coding	P06276	57	GC03M165772	9.61562	https://www.genecards.org/cgi-bin/carddisp.pl?gene=BCHE
FMR1	Fragile X Messenger Ribonucleoprotein 1	Protein Coding	Q06787	51	GC0XP147968	9.60552	https://www.genecards.org/cgi-bin/carddisp.pl?gene=FMR1
ACO1	Aconitase 1	Protein Coding	P21399	50	GC09P032374	9.59661	https://www.genecards.org/cgi-bin/carddisp.pl?gene=ACO1
ALOX12	Arachidonate 12-Lipoxygenase, 12S Type	Protein Coding	P18054	52	GC17P007009	9.59571	https://www.genecards.org/cgi-bin/carddisp.pl?gene=ALOX12
GLUD1	Glutamate Dehydrogenase 1	Protein Coding	P00367	57	GC10M087050	9.59429	https://www.genecards.org/cgi-bin/carddisp.pl?gene=GLUD1
CYP19A1	Cytochrome P450 Family 19 Subfamily A Member 1	Protein Coding	P11511	56	GC15M051208	9.5828	https://www.genecards.org/cgi-bin/carddisp.pl?gene=CYP19A1
RAD51	RAD51 Recombinase	Protein Coding	Q06609	57	GC15P040694	9.58217	https://www.genecards.org/cgi-bin/carddisp.pl?gene=RAD51
ALAD	Aminolevulinate Dehydratase	Protein Coding	P13716	53	GC09M113386	9.56843	https://www.genecards.org/cgi-bin/carddisp.pl?gene=ALAD
NOL3	Nucleolar Protein 3	Protein Coding	O60936	48	GC16P067302	9.54698	https://www.genecards.org/cgi-bin/carddisp.pl?gene=NOL3
PRKCG	Protein Kinase C Gamma	Protein Coding	P05129	58	GC19P053879	9.54554	https://www.genecards.org/cgi-bin/carddisp.pl?gene=PRKCG
DNM1L	Dynamin 1 Like	Protein Coding	O00429	55	GC12P032679	9.54119	https://www.genecards.org/cgi-bin/carddisp.pl?gene=DNM1L
AKR1C1	Aldo-Keto Reductase Family 1 Member C1	Protein Coding	Q04828	50	GC10P004963	9.54044	https://www.genecards.org/cgi-bin/carddisp.pl?gene=AKR1C1
ATP1A3	ATPase Na+/K+ Transporting Subunit Alpha 3	Protein Coding	P13637	55	GC19M041966	9.54042	https://www.genecards.org/cgi-bin/carddisp.pl?gene=ATP1A3
MDH2	Malate Dehydrogenase 2	Protein Coding	P40926	54	GC07P076048	9.51876	https://www.genecards.org/cgi-bin/carddisp.pl?gene=MDH2
EIF2AK4	Eukaryotic Translation Initiation Factor 2 Alpha Kinase 4	Protein Coding	Q9P2K8	52	GC15P039934	9.51196	https://www.genecards.org/cgi-bin/carddisp.pl?gene=EIF2AK4
DHCR24	24-Dehydrocholesterol Reductase	Protein Coding	Q15392	52	GC01M054849	9.51173	https://www.genecards.org/cgi-bin/carddisp.pl?gene=DHCR24
RPS6KA4	Ribosomal Protein S6 Kinase A4	Protein Coding	O75676	53	GC11P064591	9.50049	https://www.genecards.org/cgi-bin/carddisp.pl?gene=RPS6KA4
S100A8	S100 Calcium Binding Protein A8	Protein Coding	P05109	49	GC01M156024	9.49938	https://www.genecards.org/cgi-bin/carddisp.pl?gene=S100A8
UGT1A6	UDP Glucuronosyltransferase Family 1 Member A6	Protein Coding	P19224	49	GC02P233691	9.46593	https://www.genecards.org/cgi-bin/carddisp.pl?gene=UGT1A6
HTT	Huntingtin	Protein Coding	P42858	50	GC04P003041	9.45429	https://www.genecards.org/cgi-bin/carddisp.pl?gene=HTT
NDUFA2	NADH:Ubiquinone Oxidoreductase Subunit A2	Protein Coding	O43678	48	GC05M140725	9.43833	https://www.genecards.org/cgi-bin/carddisp.pl?gene=NDUFA2
APOH	Apolipoprotein H	Protein Coding	P02749	50	GC17M066212	9.42172	https://www.genecards.org/cgi-bin/carddisp.pl?gene=APOH
GRIN2B	Glutamate Ionotropic Receptor NMDA Type Subunit 2B	Protein Coding	Q13224	59	GC12M013437	9.4185	https://www.genecards.org/cgi-bin/carddisp.pl?gene=GRIN2B
MSRB3	Methionine Sulfoxide Reductase B3	Protein Coding	Q8IXL7	49	GC12P065279	9.4179	https://www.genecards.org/cgi-bin/carddisp.pl?gene=MSRB3
GFER	Growth Factor, Augmenter Of Liver Regeneration	Protein Coding	P55789	52	GC16P001984	9.40281	https://www.genecards.org/cgi-bin/carddisp.pl?gene=GFER
TRPA1	Transient Receptor Potential Cation Channel Subfamily A Member 1	Protein Coding	O75762	54	GC08M072019	9.40274	https://www.genecards.org/cgi-bin/carddisp.pl?gene=TRPA1
KRAS	KRAS Proto-Oncogene, GTPase	Protein Coding	P01116	60	GC12M025583	9.4011	https://www.genecards.org/cgi-bin/carddisp.pl?gene=KRAS
IL17A	Interleukin 17A	Protein Coding	Q16552	49	GC06P052186	9.40086	https://www.genecards.org/cgi-bin/carddisp.pl?gene=IL17A
HAO1	Hydroxyacid Oxidase 1	Protein Coding	Q9UJM8	48	GC20M009050	9.39845	https://www.genecards.org/cgi-bin/carddisp.pl?gene=HAO1
MT-ND2	Mitochondrially Encoded NADH:Ubiquinone Oxidoreductase Core Subunit 2	Protein Coding	P03891	40	GCMTP004472	9.38019	https://www.genecards.org/cgi-bin/carddisp.pl?gene=MT-ND2
PPIA	Peptidylprolyl Isomerase A	Protein Coding	P62937	52	GC07P044811	9.3724	https://www.genecards.org/cgi-bin/carddisp.pl?gene=PPIA
ZFAND1	Zinc Finger AN1-Type Containing 1	Protein Coding	Q8TCF1	39	GC08M081701	9.36384	https://www.genecards.org/cgi-bin/carddisp.pl?gene=ZFAND1
BACH1	BTB Domain And CNC Homolog 1	Protein Coding	O14867	48	GC21P029194	9.35605	https://www.genecards.org/cgi-bin/carddisp.pl?gene=BACH1
DECR1	2,4-Dienoyl-CoA Reductase 1	Protein Coding	Q16698	47	GC08P090001	9.33792	https://www.genecards.org/cgi-bin/carddisp.pl?gene=DECR1
GLUL	Glutamate-Ammonia Ligase	Protein Coding	P15104	55	GC01M182378	9.33444	https://www.genecards.org/cgi-bin/carddisp.pl?gene=GLUL
TRAF6	TNF Receptor Associated Factor 6	Protein Coding	Q9Y4K3	53	GC11M036467	9.33384	https://www.genecards.org/cgi-bin/carddisp.pl?gene=TRAF6
RAF1	Raf-1 Proto-Oncogene, Serine/Threonine Kinase	Protein Coding	P04049	61	GC03M012583	9.32179	https://www.genecards.org/cgi-bin/carddisp.pl?gene=RAF1
CYP4F2	Cytochrome P450 Family 4 Subfamily F Member 2	Protein Coding	P78329	50	GC19M015878	9.30281	https://www.genecards.org/cgi-bin/carddisp.pl?gene=CYP4F2
TIMP1	TIMP Metallopeptidase Inhibitor 1	Protein Coding	P01033	52	GC0XP047922	9.29778	https://www.genecards.org/cgi-bin/carddisp.pl?gene=TIMP1
GSTM2	Glutathione S-Transferase Mu 2	Protein Coding	P28161	48	GC01P109668	9.29589	https://www.genecards.org/cgi-bin/carddisp.pl?gene=GSTM2
GSTA4	Glutathione S-Transferase Alpha 4	Protein Coding	O15217	46	GC06M052977	9.28215	https://www.genecards.org/cgi-bin/carddisp.pl?gene=GSTA4
CREB3	CAMP Responsive Element Binding Protein 3	Protein Coding	O43889	44	GC09P052013	9.27799	https://www.genecards.org/cgi-bin/carddisp.pl?gene=CREB3
ZFP36	ZFP36 Ring Finger Protein	Protein Coding	P26651	45	GC19P039406	9.27751	https://www.genecards.org/cgi-bin/carddisp.pl?gene=ZFP36
FANCD2	FA Complementation Group D2	Protein Coding	Q9BXW9	53	GC03P010026	9.27257	https://www.genecards.org/cgi-bin/carddisp.pl?gene=FANCD2
CTSD	Cathepsin D	Protein Coding	P07339	60	GC11M001752	9.26679	https://www.genecards.org/cgi-bin/carddisp.pl?gene=CTSD
ALDH3A1	Aldehyde Dehydrogenase 3 Family Member A1	Protein Coding	P30838	53	GC17M019737	9.26597	https://www.genecards.org/cgi-bin/carddisp.pl?gene=ALDH3A1
NPM1	Nucleophosmin 1	Protein Coding	P06748	57	GC05P171387	9.26547	https://www.genecards.org/cgi-bin/carddisp.pl?gene=NPM1
CASP1	Caspase 1	Protein Coding	P29466	56	GC11M105025	9.26546	https://www.genecards.org/cgi-bin/carddisp.pl?gene=CASP1
RETN	Resistin	Protein Coding	Q9HD89	49	GC19P007669	9.26377	https://www.genecards.org/cgi-bin/carddisp.pl?gene=RETN
GAD2	Glutamate Decarboxylase 2	Protein Coding	Q05329	50	GC10P026216	9.26358	https://www.genecards.org/cgi-bin/carddisp.pl?gene=GAD2
GGA2	Golgi Associated, Gamma Adaptin Ear Containing, ARF Binding Protein 2	Protein Coding	Q9UJY4	44	GC16M024311	9.25954	https://www.genecards.org/cgi-bin/carddisp.pl?gene=GGA2
ELANE	Elastase, Neutrophil Expressed	Protein Coding	P08246	58	GC19P005575	9.25762	https://www.genecards.org/cgi-bin/carddisp.pl?gene=ELANE
MAP3K1	Mitogen-Activated Protein Kinase Kinase Kinase 1	Protein Coding	Q13233	56	GC05P056815	9.25382	https://www.genecards.org/cgi-bin/carddisp.pl?gene=MAP3K1
APAF1	Apoptotic Peptidase Activating Factor 1	Protein Coding	O14727	54	GC12P098645	9.23949	https://www.genecards.org/cgi-bin/carddisp.pl?gene=APAF1
ACTA1	Actin Alpha 1, Skeletal Muscle	Protein Coding	P68133	54	GC01M229883	9.23673	https://www.genecards.org/cgi-bin/carddisp.pl?gene=ACTA1
AOX1	Aldehyde Oxidase 1	Protein Coding	Q06278	51	GC02P200585	9.23508	https://www.genecards.org/cgi-bin/carddisp.pl?gene=AOX1
KCNE2	Potassium Voltage-Gated Channel Subfamily E Regulatory Subunit 2	Protein Coding	Q9Y6J6	49	GC21P034364	9.22717	https://www.genecards.org/cgi-bin/carddisp.pl?gene=KCNE2
SYK	Spleen Associated Tyrosine Kinase	Protein Coding	P43405	57	GC09P094897	9.221	https://www.genecards.org/cgi-bin/carddisp.pl?gene=SYK
PIK3R1	Phosphoinositide-3-Kinase Regulatory Subunit 1	Protein Coding	P27986	58	GC05P068215	9.22086	https://www.genecards.org/cgi-bin/carddisp.pl?gene=PIK3R1
RPS6KB1	Ribosomal Protein S6 Kinase B1	Protein Coding	P23443	56	GC17P059893	9.2208	https://www.genecards.org/cgi-bin/carddisp.pl?gene=RPS6KB1
NOTCH3	Notch Receptor 3	Protein Coding	Q9UM47	58	GC19M015159	9.21967	https://www.genecards.org/cgi-bin/carddisp.pl?gene=NOTCH3
NDRG1	N-Myc Downstream Regulated 1	Protein Coding	Q92597	52	GC08M133237	9.21783	https://www.genecards.org/cgi-bin/carddisp.pl?gene=NDRG1
PECAM1	Platelet And Endothelial Cell Adhesion Molecule 1	Protein Coding	P16284	48	GC17M064319	9.20866	https://www.genecards.org/cgi-bin/carddisp.pl?gene=PECAM1
MIF	Macrophage Migration Inhibitory Factor	Protein Coding	P14174	54	GC22P023894	9.2083	https://www.genecards.org/cgi-bin/carddisp.pl?gene=MIF
KLF2	KLF Transcription Factor 2	Protein Coding	Q9Y5W3	46	GC19P082804	9.19935	https://www.genecards.org/cgi-bin/carddisp.pl?gene=KLF2
IL4	Interleukin 4	Protein Coding	P05112	53	GC05P132673	9.17855	https://www.genecards.org/cgi-bin/carddisp.pl?gene=IL4
RAC2	Rac Family Small GTPase 2	Protein Coding	P15153	58	GC22M068176	9.17776	https://www.genecards.org/cgi-bin/carddisp.pl?gene=RAC2
TNFRSF1B	TNF Receptor Superfamily Member 1B	Protein Coding	P20333	56	GC01P012401	9.17493	https://www.genecards.org/cgi-bin/carddisp.pl?gene=TNFRSF1B
ATP5F1E	ATP Synthase F1 Subunit Epsilon	Protein Coding	P56381	49	GC20M059026	9.17061	https://www.genecards.org/cgi-bin/carddisp.pl?gene=ATP5F1E
TMEM161A	Transmembrane Protein 161A	Protein Coding	Q9NX61	42	GC19M019120	9.16666	https://www.genecards.org/cgi-bin/carddisp.pl?gene=TMEM161A
GPX2	Glutathione Peroxidase 2	Protein Coding	P18283	47	GC14M064939	9.14582	https://www.genecards.org/cgi-bin/carddisp.pl?gene=GPX2
DMD	Dystrophin	Protein Coding	P11532	52	GC0XM031097	9.14032	https://www.genecards.org/cgi-bin/carddisp.pl?gene=DMD
GRIA1	Glutamate Ionotropic Receptor AMPA Type Subunit 1	Protein Coding	P42261	56	GC05P153467	9.13873	https://www.genecards.org/cgi-bin/carddisp.pl?gene=GRIA1
NOTCH1	Notch Receptor 1	Protein Coding	P46531	58	GC09M138170	9.13804	https://www.genecards.org/cgi-bin/carddisp.pl?gene=NOTCH1
EIF4EBP1	Eukaryotic Translation Initiation Factor 4E Binding Protein 1	Protein Coding	Q13541	53	GC08P038813	9.13476	https://www.genecards.org/cgi-bin/carddisp.pl?gene=EIF4EBP1
SDHAF1	Succinate Dehydrogenase Complex Assembly Factor 1	Protein Coding	A6NFY7	41	GC19P035995	9.12978	https://www.genecards.org/cgi-bin/carddisp.pl?gene=SDHAF1
TRPV1	Transient Receptor Potential Cation Channel Subfamily V Member 1	Protein Coding	Q8NER1	54	GC17M003565	9.12921	https://www.genecards.org/cgi-bin/carddisp.pl?gene=TRPV1
SERPINA1	Serpin Family A Member 1	Protein Coding	P01009	56	GC14M094376	9.11028	https://www.genecards.org/cgi-bin/carddisp.pl?gene=SERPINA1
SPR	Sepiapterin Reductase	Protein Coding	P35270	56	GC02P072850	9.10212	https://www.genecards.org/cgi-bin/carddisp.pl?gene=SPR
PIEZO1	Piezo Type Mechanosensitive Ion Channel Component 1	Protein Coding	Q92508	47	GC16M088715	9.10192	https://www.genecards.org/cgi-bin/carddisp.pl?gene=PIEZO1
GUCY1B1	Guanylate Cyclase 1 Soluble Subunit Beta 1	Protein Coding	Q02153	46	GC04P155759	9.08557	https://www.genecards.org/cgi-bin/carddisp.pl?gene=GUCY1B1
DUSP19	Dual Specificity Phosphatase 19	Protein Coding	Q8WTR2	45	GC02P183078	9.08366	https://www.genecards.org/cgi-bin/carddisp.pl?gene=DUSP19
CDK4	Cyclin Dependent Kinase 4	Protein Coding	P11802	61	GC12M058711	9.05322	https://www.genecards.org/cgi-bin/carddisp.pl?gene=CDK4
CASP7	Caspase 7	Protein Coding	P55210	56	GC10P113679	9.05013	https://www.genecards.org/cgi-bin/carddisp.pl?gene=CASP7
IGF2BP1	Insulin Like Growth Factor 2 MRNA Binding Protein 1	Protein Coding	Q9NZI8	47	GC17P078588	9.04949	https://www.genecards.org/cgi-bin/carddisp.pl?gene=IGF2BP1
ACTB	Actin Beta	Protein Coding	P60709	56	GC07M005527	9.04868	https://www.genecards.org/cgi-bin/carddisp.pl?gene=ACTB
PDIA2	Protein Disulfide Isomerase Family A Member 2	Protein Coding	Q13087	48	GC16P021344	9.04636	https://www.genecards.org/cgi-bin/carddisp.pl?gene=PDIA2
DDX3X	DEAD-Box Helicase 3 X-Linked	Protein Coding	O00571	55	GC0XP041333	9.04503	https://www.genecards.org/cgi-bin/carddisp.pl?gene=DDX3X
CAPN2	Calpain 2	Protein Coding	P17655	54	GC01P223701	9.0442	https://www.genecards.org/cgi-bin/carddisp.pl?gene=CAPN2
PDLIM4	PDZ And LIM Domain 4	Protein Coding	P50479	46	GC05P132257	9.04343	https://www.genecards.org/cgi-bin/carddisp.pl?gene=PDLIM4
GPX8	Glutathione Peroxidase 8 (Putative)	Protein Coding	Q8TED1	45	GC05P055160	9.04074	https://www.genecards.org/cgi-bin/carddisp.pl?gene=GPX8
CYP3A5	Cytochrome P450 Family 3 Subfamily A Member 5	Protein Coding	P20815	51	GC07M099648	9.03968	https://www.genecards.org/cgi-bin/carddisp.pl?gene=CYP3A5
TOR1A	Torsin Family 1 Member A	Protein Coding	O14656	53	GC09M129812	9.02811	https://www.genecards.org/cgi-bin/carddisp.pl?gene=TOR1A
RPA1	Replication Protein A1	Protein Coding	P27694	54	GC17P001829	9.02718	https://www.genecards.org/cgi-bin/carddisp.pl?gene=RPA1
NDUFC2	NADH:Ubiquinone Oxidoreductase Subunit C2	Protein Coding	O95298	46	GC11M078068	9.00982	https://www.genecards.org/cgi-bin/carddisp.pl?gene=NDUFC2
ERCC6	ERCC Excision Repair 6, Chromatin Remodeling Factor	Protein Coding	Q03468	53	GC10M049454	9.00896	https://www.genecards.org/cgi-bin/carddisp.pl?gene=ERCC6
UBC	Ubiquitin C	Protein Coding	P0CG48	50	GC12M124911	8.97401	https://www.genecards.org/cgi-bin/carddisp.pl?gene=UBC
RB1	RB Transcriptional Corepressor 1	Protein Coding	P06400	55	GC13P048303	8.95869	https://www.genecards.org/cgi-bin/carddisp.pl?gene=RB1
H2AX	H2A.X Variant Histone	Protein Coding	P16104	50	GC11M119408	8.95564	https://www.genecards.org/cgi-bin/carddisp.pl?gene=H2AX
LTF	Lactotransferrin	Protein Coding	P02788	52	GC03M046435	8.94851	https://www.genecards.org/cgi-bin/carddisp.pl?gene=LTF
ACHE	Acetylcholinesterase (Cartwright Blood Group)	Protein Coding	P22303	53	GC07M100889	8.9378	https://www.genecards.org/cgi-bin/carddisp.pl?gene=ACHE
CASP4	Caspase 4	Protein Coding	P49662	53	GC11M104942	8.92698	https://www.genecards.org/cgi-bin/carddisp.pl?gene=CASP4
COX6B1	Cytochrome C Oxidase Subunit 6B1	Protein Coding	P14854	50	GC19P083154	8.92528	https://www.genecards.org/cgi-bin/carddisp.pl?gene=COX6B1
CYP24A1	Cytochrome P450 Family 24 Subfamily A Member 1	Protein Coding	Q07973	53	GC20M054153	8.92166	https://www.genecards.org/cgi-bin/carddisp.pl?gene=CYP24A1
NGF	Nerve Growth Factor	Protein Coding	P01138	58	GC01M115285	8.90703	https://www.genecards.org/cgi-bin/carddisp.pl?gene=NGF
PLA2G4A	Phospholipase A2 Group IVA	Protein Coding	P47712	54	GC01P186798	8.90126	https://www.genecards.org/cgi-bin/carddisp.pl?gene=PLA2G4A
IGF1R	Insulin Like Growth Factor 1 Receptor	Protein Coding	P08069	61	GC15P098648	8.89028	https://www.genecards.org/cgi-bin/carddisp.pl?gene=IGF1R
SCARB1	Scavenger Receptor Class B Member 1	Protein Coding	Q8WTV0	54	GC12M124776	8.88938	https://www.genecards.org/cgi-bin/carddisp.pl?gene=SCARB1
LOX	Lysyl Oxidase	Protein Coding	P28300	54	GC05M122063	8.8889	https://www.genecards.org/cgi-bin/carddisp.pl?gene=LOX
CRYAA	Crystallin Alpha A	Protein Coding	P02489	52	GC21P043169	8.87639	https://www.genecards.org/cgi-bin/carddisp.pl?gene=CRYAA
COL4A1	Collagen Type IV Alpha 1 Chain	Protein Coding	P02462	54	GC13M110148	8.87434	https://www.genecards.org/cgi-bin/carddisp.pl?gene=COL4A1
AS3MT	Arsenite Methyltransferase	Protein Coding	Q9HBK9	46	GC10P102869	8.86785	https://www.genecards.org/cgi-bin/carddisp.pl?gene=AS3MT
MAPKAP1	MAPK Associated Protein 1	Protein Coding	Q9BPZ7	50	GC09M125437	8.86619	https://www.genecards.org/cgi-bin/carddisp.pl?gene=MAPKAP1
NDUFA9	NADH:Ubiquinone Oxidoreductase Subunit A9	Protein Coding	Q16795	50	GC12P004649	8.85847	https://www.genecards.org/cgi-bin/carddisp.pl?gene=NDUFA9
MT-ND5	Mitochondrially Encoded NADH:Ubiquinone Oxidoreductase Core Subunit 5	Protein Coding	P03915	39	GCMTP012339	8.85797	https://www.genecards.org/cgi-bin/carddisp.pl?gene=MT-ND5
PLG	Plasminogen	Protein Coding	P00747	56	GC06P160702	8.83979	https://www.genecards.org/cgi-bin/carddisp.pl?gene=PLG
NDUFA8	NADH:Ubiquinone Oxidoreductase Subunit A8	Protein Coding	P51970	49	GC09M122132	8.83874	https://www.genecards.org/cgi-bin/carddisp.pl?gene=NDUFA8
AHR	Aryl Hydrocarbon Receptor	Protein Coding	P35869	53	GC07P016916	8.82964	https://www.genecards.org/cgi-bin/carddisp.pl?gene=AHR
MECP2	Methyl-CpG Binding Protein 2	Protein Coding	P51608	53	GC0XM154021	8.82796	https://www.genecards.org/cgi-bin/carddisp.pl?gene=MECP2
GDF15	Growth Differentiation Factor 15	Protein Coding	Q99988	49	GC19P082847	8.80784	https://www.genecards.org/cgi-bin/carddisp.pl?gene=GDF15
PXN	Paxillin	Protein Coding	P49023	52	GC12M120210	8.80778	https://www.genecards.org/cgi-bin/carddisp.pl?gene=PXN
CHCHD4	Coiled-Coil-Helix-Coiled-Coil-Helix Domain Containing 4	Protein Coding	Q8N4Q1	42	GC03M023367	8.799	https://www.genecards.org/cgi-bin/carddisp.pl?gene=CHCHD4
ALOX15	Arachidonate 15-Lipoxygenase	Protein Coding	P16050	52	GC17M004630	8.79893	https://www.genecards.org/cgi-bin/carddisp.pl?gene=ALOX15
C9orf72	C9orf72-SMCR8 Complex Subunit	Protein Coding	Q96LT7	47	GC09M028870	8.78837	https://www.genecards.org/cgi-bin/carddisp.pl?gene=C9orf72
DNMT1	DNA Methyltransferase 1	Protein Coding	P26358	59	GC19M010133	8.78129	https://www.genecards.org/cgi-bin/carddisp.pl?gene=DNMT1
OMA1	OMA1 Zinc Metallopeptidase	Protein Coding	Q96E52	42	GC01M058415	8.77078	https://www.genecards.org/cgi-bin/carddisp.pl?gene=OMA1
EPHX2	Epoxide Hydrolase 2	Protein Coding	P34913	54	GC08P027490	8.76721	https://www.genecards.org/cgi-bin/carddisp.pl?gene=EPHX2
ABCA1	ATP Binding Cassette Subfamily A Member 1	Protein Coding	O95477	55	GC09M104781	8.76663	https://www.genecards.org/cgi-bin/carddisp.pl?gene=ABCA1
CYP17A1	Cytochrome P450 Family 17 Subfamily A Member 1	Protein Coding	P05093	56	GC10M102830	8.76134	https://www.genecards.org/cgi-bin/carddisp.pl?gene=CYP17A1
ADH1C	Alcohol Dehydrogenase 1C (Class I), Gamma Polypeptide	Protein Coding	P00326	47	GC04M099336	8.75355	https://www.genecards.org/cgi-bin/carddisp.pl?gene=ADH1C
ACAD11	Acyl-CoA Dehydrogenase Family Member 11	Protein Coding	Q709F0	43	GC03M132559	8.75233	https://www.genecards.org/cgi-bin/carddisp.pl?gene=ACAD11
CYP11A1	Cytochrome P450 Family 11 Subfamily A Member 1	Protein Coding	P05108	54	GC15M074337	8.74733	https://www.genecards.org/cgi-bin/carddisp.pl?gene=CYP11A1
NAMPT	Nicotinamide Phosphoribosyltransferase	Protein Coding	P43490	54	GC07M106248	8.74719	https://www.genecards.org/cgi-bin/carddisp.pl?gene=NAMPT
EPHA3	EPH Receptor A3	Protein Coding	P29320	53	GC03P089077	8.74375	https://www.genecards.org/cgi-bin/carddisp.pl?gene=EPHA3
HDAC2	Histone Deacetylase 2	Protein Coding	Q92769	59	GC06M113933	8.7405	https://www.genecards.org/cgi-bin/carddisp.pl?gene=HDAC2
CCL3	C-C Motif Chemokine Ligand 3	Protein Coding	P10147	46	GC17M036088	8.73669	https://www.genecards.org/cgi-bin/carddisp.pl?gene=CCL3
GSTA2	Glutathione S-Transferase Alpha 2	Protein Coding	P09210	46	GC06M052750	8.73305	https://www.genecards.org/cgi-bin/carddisp.pl?gene=GSTA2
SLC17A5	Solute Carrier Family 17 Member 5	Protein Coding	Q9NRA2	51	GC06M073593	8.73177	https://www.genecards.org/cgi-bin/carddisp.pl?gene=SLC17A5
MAP3K7	Mitogen-Activated Protein Kinase Kinase Kinase 7	Protein Coding	O43318	58	GC06M090513	8.71677	https://www.genecards.org/cgi-bin/carddisp.pl?gene=MAP3K7
PLAU	Plasminogen Activator, Urokinase	Protein Coding	P00749	58	GC10P073909	8.71397	https://www.genecards.org/cgi-bin/carddisp.pl?gene=PLAU
F3	Coagulation Factor III, Tissue Factor	Protein Coding	P13726	52	GC01M094703	8.71255	https://www.genecards.org/cgi-bin/carddisp.pl?gene=F3
FTO	FTO Alpha-Ketoglutarate Dependent Dioxygenase	Protein Coding	Q9C0B1	54	GC16P053949	8.6881	https://www.genecards.org/cgi-bin/carddisp.pl?gene=FTO
TG	Thyroglobulin	Protein Coding	P01266	51	GC08P132866	8.68691	https://www.genecards.org/cgi-bin/carddisp.pl?gene=TG
MLYCD	Malonyl-CoA Decarboxylase	Protein Coding	O95822	49	GC16P083899	8.66812	https://www.genecards.org/cgi-bin/carddisp.pl?gene=MLYCD
PLCG1	Phospholipase C Gamma 1	Protein Coding	P19174	54	GC20P041136	8.6632	https://www.genecards.org/cgi-bin/carddisp.pl?gene=PLCG1
FGF2	Fibroblast Growth Factor 2	Protein Coding	P09038	52	GC04P122826	8.66014	https://www.genecards.org/cgi-bin/carddisp.pl?gene=FGF2
FTL	Ferritin Light Chain	Protein Coding	P02792	52	GC19P048965	8.65816	https://www.genecards.org/cgi-bin/carddisp.pl?gene=FTL
GSTO1	Glutathione S-Transferase Omega 1	Protein Coding	P78417	52	GC10P104235	8.65195	https://www.genecards.org/cgi-bin/carddisp.pl?gene=GSTO1
HDAC1	Histone Deacetylase 1	Protein Coding	Q13547	57	GC01P032292	8.64727	https://www.genecards.org/cgi-bin/carddisp.pl?gene=HDAC1
SCN4A	Sodium Voltage-Gated Channel Alpha Subunit 4	Protein Coding	P35499	53	GC17M063938	8.64426	https://www.genecards.org/cgi-bin/carddisp.pl?gene=SCN4A
RARA	Retinoic Acid Receptor Alpha	Protein Coding	P10276	57	GC17P040309	8.6378	https://www.genecards.org/cgi-bin/carddisp.pl?gene=RARA
MAP2K2	Mitogen-Activated Protein Kinase Kinase 2	Protein Coding	P36507	61	GC19M004090	8.62975	https://www.genecards.org/cgi-bin/carddisp.pl?gene=MAP2K2
SERPINF1	Serpin Family F Member 1	Protein Coding	P36955	52	GC17P002420	8.62112	https://www.genecards.org/cgi-bin/carddisp.pl?gene=SERPINF1
VDAC1	Voltage Dependent Anion Channel 1	Protein Coding	P21796	52	GC05M133975	8.61675	https://www.genecards.org/cgi-bin/carddisp.pl?gene=VDAC1
S100A9	S100 Calcium Binding Protein A9	Protein Coding	P06702	50	GC01P153357	8.61435	https://www.genecards.org/cgi-bin/carddisp.pl?gene=S100A9
FLT1	Fms Related Receptor Tyrosine Kinase 1	Protein Coding	P17948	58	GC13M028300	8.60981	https://www.genecards.org/cgi-bin/carddisp.pl?gene=FLT1
DUOX2	Dual Oxidase 2	Protein Coding	Q9NRD8	50	GC15M045092	8.60823	https://www.genecards.org/cgi-bin/carddisp.pl?gene=DUOX2
NOA1	Nitric Oxide Associated 1	Protein Coding	Q8NC60	42	GC04M056963	8.60066	https://www.genecards.org/cgi-bin/carddisp.pl?gene=NOA1
FAAH	Fatty Acid Amide Hydrolase	Protein Coding	O00519	53	GC01P046394	8.59627	https://www.genecards.org/cgi-bin/carddisp.pl?gene=FAAH
TFRC	Transferrin Receptor	Protein Coding	P02786	57	GC03M196144	8.59565	https://www.genecards.org/cgi-bin/carddisp.pl?gene=TFRC
PML	PML Nuclear Body Scaffold	Protein Coding	P29590	53	GC15P073994	8.5857	https://www.genecards.org/cgi-bin/carddisp.pl?gene=PML
TPM1	Tropomyosin 1	Protein Coding	P09493	56	GC15P137123	8.57652	https://www.genecards.org/cgi-bin/carddisp.pl?gene=TPM1
EIF4G1	Eukaryotic Translation Initiation Factor 4 Gamma 1	Protein Coding	Q04637	54	GC03P184314	8.57543	https://www.genecards.org/cgi-bin/carddisp.pl?gene=EIF4G1
ALKBH1	AlkB Homolog 1, Histone H2A Dioxygenase	Protein Coding	Q13686	42	GC14M077672	8.55683	https://www.genecards.org/cgi-bin/carddisp.pl?gene=ALKBH1
PRKDC	Protein Kinase, DNA-Activated, Catalytic Subunit	Protein Coding	P78527	57	GC08M047773	8.55501	https://www.genecards.org/cgi-bin/carddisp.pl?gene=PRKDC
RXRA	Retinoid X Receptor Alpha	Protein Coding	P19793	56	GC09P134317	8.54484	https://www.genecards.org/cgi-bin/carddisp.pl?gene=RXRA
OPA1	OPA1 Mitochondrial Dynamin Like GTPase	Protein Coding	O60313	51	GC03P193594	8.54427	https://www.genecards.org/cgi-bin/carddisp.pl?gene=OPA1
PPIF	Peptidylprolyl Isomerase F	Protein Coding	P30405	50	GC10P098317	8.5406	https://www.genecards.org/cgi-bin/carddisp.pl?gene=PPIF
IKBKG	Inhibitor Of Nuclear Factor Kappa B Kinase Regulatory Subunit Gamma	Protein Coding	Q9Y6K9	54	GC0XP154541	8.53826	https://www.genecards.org/cgi-bin/carddisp.pl?gene=IKBKG
NDUFA10	NADH:Ubiquinone Oxidoreductase Subunit A10	Protein Coding	O95299	50	GC02M239893	8.52879	https://www.genecards.org/cgi-bin/carddisp.pl?gene=NDUFA10
DBH	Dopamine Beta-Hydroxylase	Protein Coding	P09172	58	GC09P133636	8.51249	https://www.genecards.org/cgi-bin/carddisp.pl?gene=DBH
DNAH8	Dynein Axonemal Heavy Chain 8	Protein Coding	Q96JB1	45	GC06P104260	8.51133	https://www.genecards.org/cgi-bin/carddisp.pl?gene=DNAH8
BAG3	BAG Cochaperone 3	Protein Coding	O95817	49	GC10P119651	8.5055	https://www.genecards.org/cgi-bin/carddisp.pl?gene=BAG3
IL1R1	Interleukin 1 Receptor Type 1	Protein Coding	P14778	53	GC02P102136	8.50436	https://www.genecards.org/cgi-bin/carddisp.pl?gene=IL1R1
IL13	Interleukin 13	Protein Coding	P35225	49	GC05P132656	8.50391	https://www.genecards.org/cgi-bin/carddisp.pl?gene=IL13
GLA	Galactosidase Alpha	Protein Coding	P06280	56	GC0XM101393	8.50212	https://www.genecards.org/cgi-bin/carddisp.pl?gene=GLA
SLC18A3	Solute Carrier Family 18 Member A3	Protein Coding	Q16572	50	GC10P049610	8.49108	https://www.genecards.org/cgi-bin/carddisp.pl?gene=SLC18A3
CPT1B	Carnitine Palmitoyltransferase 1B	Protein Coding	Q92523	50	GC22M068337	8.47136	https://www.genecards.org/cgi-bin/carddisp.pl?gene=CPT1B
BDKRB2	Bradykinin Receptor B2	Protein Coding	P30411	52	GC14P096205	8.45681	https://www.genecards.org/cgi-bin/carddisp.pl?gene=BDKRB2
PDIA3	Protein Disulfide Isomerase Family A Member 3	Protein Coding	P30101	50	GC15P043746	8.45489	https://www.genecards.org/cgi-bin/carddisp.pl?gene=PDIA3
VDR	Vitamin D Receptor	Protein Coding	P11473	57	GC12M047841	8.4481	https://www.genecards.org/cgi-bin/carddisp.pl?gene=VDR
LCN2	Lipocalin 2	Protein Coding	P80188	52	GC09P128149	8.44532	https://www.genecards.org/cgi-bin/carddisp.pl?gene=LCN2
NR4A2	Nuclear Receptor Subfamily 4 Group A Member 2	Protein Coding	P43354	53	GC02M156324	8.42859	https://www.genecards.org/cgi-bin/carddisp.pl?gene=NR4A2
BRAF	B-Raf Proto-Oncogene, Serine/Threonine Kinase	Protein Coding	P15056	61	GC07M140751	8.42068	https://www.genecards.org/cgi-bin/carddisp.pl?gene=BRAF
NR2C2	Nuclear Receptor Subfamily 2 Group C Member 2	Protein Coding	P49116	49	GC03P014947	8.4173	https://www.genecards.org/cgi-bin/carddisp.pl?gene=NR2C2
HMGCR	3-Hydroxy-3-Methylglutaryl-CoA Reductase	Protein Coding	P04035	53	GC05P075336	8.39872	https://www.genecards.org/cgi-bin/carddisp.pl?gene=HMGCR
MAPK8IP1	Mitogen-Activated Protein Kinase 8 Interacting Protein 1	Protein Coding	Q9UQF2	51	GC11P046828	8.3959	https://www.genecards.org/cgi-bin/carddisp.pl?gene=MAPK8IP1
F8	Coagulation Factor VIII	Protein Coding	P00451	54	GC0XM154835	8.37033	https://www.genecards.org/cgi-bin/carddisp.pl?gene=F8
ODC1	Ornithine Decarboxylase 1	Protein Coding	P11926	55	GC02M010432	8.35528	https://www.genecards.org/cgi-bin/carddisp.pl?gene=ODC1
ADRB1	Adrenoceptor Beta 1	Protein Coding	P08588	55	GC10P114044	8.34928	https://www.genecards.org/cgi-bin/carddisp.pl?gene=ADRB1
TRPV4	Transient Receptor Potential Cation Channel Subfamily V Member 4	Protein Coding	Q9HBA0	55	GC12M109783	8.34902	https://www.genecards.org/cgi-bin/carddisp.pl?gene=TRPV4
YARS2	Tyrosyl-TRNA Synthetase 2	Protein Coding	Q9Y2Z4	51	GC12M032842	8.3437	https://www.genecards.org/cgi-bin/carddisp.pl?gene=YARS2
KLK3	Kallikrein Related Peptidase 3	Protein Coding	P07288	53	GC19P050854	8.33197	https://www.genecards.org/cgi-bin/carddisp.pl?gene=KLK3
S100B	S100 Calcium Binding Protein B	Protein Coding	P04271	51	GC21M052331	8.33038	https://www.genecards.org/cgi-bin/carddisp.pl?gene=S100B
PLA2G2A	Phospholipase A2 Group IIA	Protein Coding	P14555	53	GC01M019975	8.32764	https://www.genecards.org/cgi-bin/carddisp.pl?gene=PLA2G2A
ITPR1	Inositol 1,4,5-Trisphosphate Receptor Type 1	Protein Coding	Q14643	55	GC03P004486	8.32193	https://www.genecards.org/cgi-bin/carddisp.pl?gene=ITPR1
MUC1	Mucin 1, Cell Surface Associated	Protein Coding	P15941	55	GC01M155185	8.31404	https://www.genecards.org/cgi-bin/carddisp.pl?gene=MUC1
MANF	Mesencephalic Astrocyte Derived Neurotrophic Factor	Protein Coding	P55145	46	GC03P051385	8.30651	https://www.genecards.org/cgi-bin/carddisp.pl?gene=MANF
MAPKAPK5	MAPK Activated Protein Kinase 5	Protein Coding	Q8IW41	52	GC12P111842	8.29953	https://www.genecards.org/cgi-bin/carddisp.pl?gene=MAPKAPK5
VIM	Vimentin	Protein Coding	P08670	58	GC10P017227	8.29576	https://www.genecards.org/cgi-bin/carddisp.pl?gene=VIM
FBXL4	F-Box And Leucine Rich Repeat Protein 4	Protein Coding	Q9UKA2	47	GC06M098868	8.28194	https://www.genecards.org/cgi-bin/carddisp.pl?gene=FBXL4
IDO1	Indoleamine 2,3-Dioxygenase 1	Protein Coding	P14902	53	GC08P039891	8.27436	https://www.genecards.org/cgi-bin/carddisp.pl?gene=IDO1
GRB2	Growth Factor Receptor Bound Protein 2	Protein Coding	P62993	53	GC17M075318	8.26733	https://www.genecards.org/cgi-bin/carddisp.pl?gene=GRB2
ITGB1	Integrin Subunit Beta 1	Protein Coding	P05556	57	GC10M034478	8.26618	https://www.genecards.org/cgi-bin/carddisp.pl?gene=ITGB1
EPX	Eosinophil Peroxidase	Protein Coding	P11678	50	GC17P058192	8.24568	https://www.genecards.org/cgi-bin/carddisp.pl?gene=EPX
RPTOR	Regulatory Associated Protein Of MTOR Complex 1	Protein Coding	Q8N122	49	GC17P080544	8.24493	https://www.genecards.org/cgi-bin/carddisp.pl?gene=RPTOR
OPRM1	Opioid Receptor Mu 1	Protein Coding	P35372	54	GC06P154175	8.23731	https://www.genecards.org/cgi-bin/carddisp.pl?gene=OPRM1
DLAT	Dihydrolipoamide S-Acetyltransferase	Protein Coding	P10515	53	GC11P112162	8.2325	https://www.genecards.org/cgi-bin/carddisp.pl?gene=DLAT
ELN	Elastin	Protein Coding	P15502	50	GC07P074027	8.22884	https://www.genecards.org/cgi-bin/carddisp.pl?gene=ELN
CD40	CD40 Molecule	Protein Coding	P25942	57	GC20P046118	8.22606	https://www.genecards.org/cgi-bin/carddisp.pl?gene=CD40
ADH7	Alcohol Dehydrogenase 7 (Class IV), Mu Or Sigma Polypeptide	Protein Coding	P40394	49	GC04M099412	8.2206	https://www.genecards.org/cgi-bin/carddisp.pl?gene=ADH7
TNFSF10	TNF Superfamily Member 10	Protein Coding	P50591	51	GC03M172505	8.21166	https://www.genecards.org/cgi-bin/carddisp.pl?gene=TNFSF10
PTPN3	Protein Tyrosine Phosphatase Non-Receptor Type 3	Protein Coding	P26045	50	GC09M109375	8.21135	https://www.genecards.org/cgi-bin/carddisp.pl?gene=PTPN3
NDUFB8	NADH:Ubiquinone Oxidoreductase Subunit B8	Protein Coding	O95169	49	GC10M100523	8.20262	https://www.genecards.org/cgi-bin/carddisp.pl?gene=NDUFB8
CYP2J2	Cytochrome P450 Family 2 Subfamily J Member 2	Protein Coding	P51589	49	GC01M059893	8.19901	https://www.genecards.org/cgi-bin/carddisp.pl?gene=CYP2J2
MFN2	Mitofusin 2	Protein Coding	O95140	55	GC01P011980	8.19676	https://www.genecards.org/cgi-bin/carddisp.pl?gene=MFN2
ATXN2L	Ataxin 2 Like	Protein Coding	Q8WWM7	46	GC16P046939	8.19542	https://www.genecards.org/cgi-bin/carddisp.pl?gene=ATXN2L
ACOX2	Acyl-CoA Oxidase 2	Protein Coding	Q99424	50	GC03M058506	8.19139	https://www.genecards.org/cgi-bin/carddisp.pl?gene=ACOX2
CHCHD10	Coiled-Coil-Helix-Coiled-Coil-Helix Domain Containing 10	Protein Coding	Q8WYQ3	46	GC22M023765	8.18816	https://www.genecards.org/cgi-bin/carddisp.pl?gene=CHCHD10
LBR	Lamin B Receptor	Protein Coding	Q14739	53	GC01M225401	8.18324	https://www.genecards.org/cgi-bin/carddisp.pl?gene=LBR
CD40LG	CD40 Ligand	Protein Coding	P29965	57	GC0XP136649	8.18067	https://www.genecards.org/cgi-bin/carddisp.pl?gene=CD40LG
HBA2	Hemoglobin Subunit Alpha 2	Protein Coding	P69905	48	GC16P021339	8.17188	https://www.genecards.org/cgi-bin/carddisp.pl?gene=HBA2
HSPA13	Heat Shock Protein Family A (Hsp70) Member 13	Protein Coding	P48723	46	GC21M015016	8.15832	https://www.genecards.org/cgi-bin/carddisp.pl?gene=HSPA13
NDUFV3	NADH:Ubiquinone Oxidoreductase Subunit V3	Protein Coding	P56181	46	GC21P042879	8.15576	https://www.genecards.org/cgi-bin/carddisp.pl?gene=NDUFV3
SIGMAR1	Sigma Non-Opioid Intracellular Receptor 1	Protein Coding	Q99720	53	GC09M034634	8.14574	https://www.genecards.org/cgi-bin/carddisp.pl?gene=SIGMAR1
AKR1C3	Aldo-Keto Reductase Family 1 Member C3	Protein Coding	P42330	53	GC10P005035	8.14534	https://www.genecards.org/cgi-bin/carddisp.pl?gene=AKR1C3
RCAN1	Regulator Of Calcineurin 1	Protein Coding	P53805	49	GC21M034513	8.1412	https://www.genecards.org/cgi-bin/carddisp.pl?gene=RCAN1
BCL2A1	BCL2 Related Protein A1	Protein Coding	Q16548	48	GC15M133557	8.13949	https://www.genecards.org/cgi-bin/carddisp.pl?gene=BCL2A1
AGRN	Agrin	Protein Coding	O00468	52	GC01P001020	8.13939	https://www.genecards.org/cgi-bin/carddisp.pl?gene=AGRN
IREB2	Iron Responsive Element Binding Protein 2	Protein Coding	P48200	51	GC15P078437	8.13788	https://www.genecards.org/cgi-bin/carddisp.pl?gene=IREB2
CYB5A	Cytochrome B5 Type A	Protein Coding	P00167	50	GC18M074250	8.13068	https://www.genecards.org/cgi-bin/carddisp.pl?gene=CYB5A
TP53INP1	Tumor Protein P53 Inducible Nuclear Protein 1	Protein Coding	Q96A56	42	GC08M094925	8.12757	https://www.genecards.org/cgi-bin/carddisp.pl?gene=TP53INP1
SCD	Stearoyl-CoA Desaturase	Protein Coding	O00767	56	GC10P100347	8.1251	https://www.genecards.org/cgi-bin/carddisp.pl?gene=SCD
ITGB2	Integrin Subunit Beta 2	Protein Coding	P05107	57	GC21M044885	8.11908	https://www.genecards.org/cgi-bin/carddisp.pl?gene=ITGB2
SCN2A	Sodium Voltage-Gated Channel Alpha Subunit 2	Protein Coding	Q99250	56	GC02P165194	8.11826	https://www.genecards.org/cgi-bin/carddisp.pl?gene=SCN2A
STK39	Serine/Threonine Kinase 39	Protein Coding	Q9UEW8	50	GC02M167954	8.09927	https://www.genecards.org/cgi-bin/carddisp.pl?gene=STK39
F5	Coagulation Factor V	Protein Coding	P12259	54	GC01M169511	8.09737	https://www.genecards.org/cgi-bin/carddisp.pl?gene=F5
LIAS	Lipoic Acid Synthetase	Protein Coding	O43766	49	GC04P039509	8.08718	https://www.genecards.org/cgi-bin/carddisp.pl?gene=LIAS
NTRK2	Neurotrophic Receptor Tyrosine Kinase 2	Protein Coding	Q16620	60	GC09P084668	8.08481	https://www.genecards.org/cgi-bin/carddisp.pl?gene=NTRK2
NOX5	NADPH Oxidase 5	Protein Coding	Q96PH1	44	GC15P132654	8.08164	https://www.genecards.org/cgi-bin/carddisp.pl?gene=NOX5
DAPK1	Death Associated Protein Kinase 1	Protein Coding	P53355	56	GC09P087497	8.07777	https://www.genecards.org/cgi-bin/carddisp.pl?gene=DAPK1
NR1H2	Nuclear Receptor Subfamily 1 Group H Member 2	Protein Coding	P55055	53	GC19P050329	8.07481	https://www.genecards.org/cgi-bin/carddisp.pl?gene=NR1H2
ENDOG	Endonuclease G	Protein Coding	Q14249	49	GC09P128818	8.07097	https://www.genecards.org/cgi-bin/carddisp.pl?gene=ENDOG
OXA1L	OXA1L Mitochondrial Inner Membrane Protein	Protein Coding	Q15070	45	GC14P022766	8.06833	https://www.genecards.org/cgi-bin/carddisp.pl?gene=OXA1L
EPAS1	Endothelial PAS Domain Protein 1	Protein Coding	Q99814	57	GC02P046293	8.06794	https://www.genecards.org/cgi-bin/carddisp.pl?gene=EPAS1
MCL1	MCL1 Apoptosis Regulator, BCL2 Family Member	Protein Coding	Q07820	54	GC01M155854	8.06517	https://www.genecards.org/cgi-bin/carddisp.pl?gene=MCL1
CYP4A11	Cytochrome P450 Family 4 Subfamily A Member 11	Protein Coding	Q02928	49	GC01M046929	8.03881	https://www.genecards.org/cgi-bin/carddisp.pl?gene=CYP4A11
SLC8A1	Solute Carrier Family 8 Member A1	Protein Coding	P32418	51	GC02M040078	8.03705	https://www.genecards.org/cgi-bin/carddisp.pl?gene=SLC8A1
PARG	Poly(ADP-Ribose) Glycohydrolase	Protein Coding	Q86W56	48	GC10M049818	8.03559	https://www.genecards.org/cgi-bin/carddisp.pl?gene=PARG
FOSL1	FOS Like 1, AP-1 Transcription Factor Subunit	Protein Coding	P15407	52	GC11M109271	8.02464	https://www.genecards.org/cgi-bin/carddisp.pl?gene=FOSL1
SLC2A4	Solute Carrier Family 2 Member 4	Protein Coding	P14672	53	GC17P012995	8.0197	https://www.genecards.org/cgi-bin/carddisp.pl?gene=SLC2A4
CREB3L1	CAMP Responsive Element Binding Protein 3 Like 1	Protein Coding	Q96BA8	49	GC11P046839	8.01723	https://www.genecards.org/cgi-bin/carddisp.pl?gene=CREB3L1
FGF1	Fibroblast Growth Factor 1	Protein Coding	P05230	54	GC05M142555	8.01346	https://www.genecards.org/cgi-bin/carddisp.pl?gene=FGF1
ROCK1	Rho Associated Coiled-Coil Containing Protein Kinase 1	Protein Coding	Q13464	56	GC18M020946	8.00774	https://www.genecards.org/cgi-bin/carddisp.pl?gene=ROCK1
XIAP	X-Linked Inhibitor Of Apoptosis	Protein Coding	P98170	58	GC0XP123859	8.007	https://www.genecards.org/cgi-bin/carddisp.pl?gene=XIAP
DNM2	Dynamin 2	Protein Coding	P50570	56	GC19P010718	8.00447	https://www.genecards.org/cgi-bin/carddisp.pl?gene=DNM2
MSR1	Macrophage Scavenger Receptor 1	Protein Coding	P21757	52	GC08M016107	8.00046	https://www.genecards.org/cgi-bin/carddisp.pl?gene=MSR1
NCF4	Neutrophil Cytosolic Factor 4	Protein Coding	Q15080	54	GC22P036860	7.99812	https://www.genecards.org/cgi-bin/carddisp.pl?gene=NCF4
DYRK3	Dual Specificity Tyrosine Phosphorylation Regulated Kinase 3	Protein Coding	O43781	46	GC01P206636	7.99124	https://www.genecards.org/cgi-bin/carddisp.pl?gene=DYRK3
CIRBP	Cold Inducible RNA Binding Protein	Protein Coding	Q14011	44	GC19P001259	7.98823	https://www.genecards.org/cgi-bin/carddisp.pl?gene=CIRBP
TJP1	Tight Junction Protein 1	Protein Coding	Q07157	51	GC15M029699	7.97931	https://www.genecards.org/cgi-bin/carddisp.pl?gene=TJP1
GCK	Glucokinase	Protein Coding	P35557	56	GC07M044807	7.97338	https://www.genecards.org/cgi-bin/carddisp.pl?gene=GCK
PVALB	Parvalbumin	Protein Coding	P20472	46	GC22M036800	7.96621	https://www.genecards.org/cgi-bin/carddisp.pl?gene=PVALB
NDUFAF1	NADH:Ubiquinone Oxidoreductase Complex Assembly Factor 1	Protein Coding	Q9Y375	48	GC15M041387	7.96461	https://www.genecards.org/cgi-bin/carddisp.pl?gene=NDUFAF1
PTH	Parathyroid Hormone	Protein Coding	P01270	52	GC11M013492	7.95975	https://www.genecards.org/cgi-bin/carddisp.pl?gene=PTH
SLC4A1	Solute Carrier Family 4 Member 1 (Diego Blood Group)	Protein Coding	P02730	55	GC17M060986	7.95624	https://www.genecards.org/cgi-bin/carddisp.pl?gene=SLC4A1
TACR1	Tachykinin Receptor 1	Protein Coding	P25103	50	GC02M075359	7.9479	https://www.genecards.org/cgi-bin/carddisp.pl?gene=TACR1
CCN2	Cellular Communication Network Factor 2	Protein Coding	P29279	53	GC06M131948	7.94642	https://www.genecards.org/cgi-bin/carddisp.pl?gene=CCN2
ALKBH2	AlkB Homolog 2, Alpha-Ketoglutarate Dependent Dioxygenase	Protein Coding	Q6NS38	42	GC12M109088	7.94284	https://www.genecards.org/cgi-bin/carddisp.pl?gene=ALKBH2
CYB5R3	Cytochrome B5 Reductase 3	Protein Coding	P00387	52	GC22M068214	7.93804	https://www.genecards.org/cgi-bin/carddisp.pl?gene=CYB5R3
SMAD2	SMAD Family Member 2	Protein Coding	Q15796	59	GC18M047809	7.93019	https://www.genecards.org/cgi-bin/carddisp.pl?gene=SMAD2
FGF7	Fibroblast Growth Factor 7	Protein Coding	P21781	50	GC15P049423	7.92736	https://www.genecards.org/cgi-bin/carddisp.pl?gene=FGF7
SLC1A3	Solute Carrier Family 1 Member 3	Protein Coding	P43003	55	GC05P036660	7.92256	https://www.genecards.org/cgi-bin/carddisp.pl?gene=SLC1A3
BIRC5	Baculoviral IAP Repeat Containing 5	Protein Coding	O15392	52	GC17P078214	7.91701	https://www.genecards.org/cgi-bin/carddisp.pl?gene=BIRC5
STK24	Serine/Threonine Kinase 24	Protein Coding	Q9Y6E0	50	GC13M098445	7.91653	https://www.genecards.org/cgi-bin/carddisp.pl?gene=STK24
AMBP	Alpha-1-Microglobulin/Bikunin Precursor	Protein Coding	P02760	50	GC09M114060	7.91346	https://www.genecards.org/cgi-bin/carddisp.pl?gene=AMBP
NDUFA1	NADH:Ubiquinone Oxidoreductase Subunit A1	Protein Coding	O15239	50	GC0XP119871	7.90944	https://www.genecards.org/cgi-bin/carddisp.pl?gene=NDUFA1
PPP1R12A	Protein Phosphatase 1 Regulatory Subunit 12A	Protein Coding	O14974	51	GC12M079773	7.90257	https://www.genecards.org/cgi-bin/carddisp.pl?gene=PPP1R12A
PC	Pyruvate Carboxylase	Protein Coding	P11498	54	GC11M066848	7.90167	https://www.genecards.org/cgi-bin/carddisp.pl?gene=PC
JUND	JunD Proto-Oncogene, AP-1 Transcription Factor Subunit	Protein Coding	P17535	48	GC19M018279	7.89412	https://www.genecards.org/cgi-bin/carddisp.pl?gene=JUND
NDUFA4	NDUFA4 Mitochondrial Complex Associated	Protein Coding	O00483	49	GC07M010938	7.87986	https://www.genecards.org/cgi-bin/carddisp.pl?gene=NDUFA4
CACNA1S	Calcium Voltage-Gated Channel Subunit Alpha1 S	Protein Coding	Q13698	56	GC01M201008	7.87778	https://www.genecards.org/cgi-bin/carddisp.pl?gene=CACNA1S
UBB	Ubiquitin B	Protein Coding	P0CG47	51	GC17P016380	7.87697	https://www.genecards.org/cgi-bin/carddisp.pl?gene=UBB
TREX1	Three Prime Repair Exonuclease 1	Protein Coding	Q9NSU2	48	GC03P051558	7.86675	https://www.genecards.org/cgi-bin/carddisp.pl?gene=TREX1
PPIG	Peptidylprolyl Isomerase G	Protein Coding	Q13427	48	GC02P169584	7.85803	https://www.genecards.org/cgi-bin/carddisp.pl?gene=PPIG
CDK6	Cyclin Dependent Kinase 6	Protein Coding	Q00534	58	GC07M092604	7.85217	https://www.genecards.org/cgi-bin/carddisp.pl?gene=CDK6
WRN	WRN RecQ Like Helicase	Protein Coding	Q14191	53	GC08P031033	7.84753	https://www.genecards.org/cgi-bin/carddisp.pl?gene=WRN
SLC7A1	Solute Carrier Family 7 Member 1	Protein Coding	P30825	49	GC13M029509	7.84416	https://www.genecards.org/cgi-bin/carddisp.pl?gene=SLC7A1
VASP	Vasodilator Stimulated Phosphoprotein	Protein Coding	P50552	50	GC19P083487	7.83328	https://www.genecards.org/cgi-bin/carddisp.pl?gene=VASP
TAC1	Tachykinin Precursor 1	Protein Coding	P20366	47	GC07P097734	7.83251	https://www.genecards.org/cgi-bin/carddisp.pl?gene=TAC1
GPX5	Glutathione Peroxidase 5	Protein Coding	O75715	44	GC06P028525	7.82805	https://www.genecards.org/cgi-bin/carddisp.pl?gene=GPX5
ITGAM	Integrin Subunit Alpha M	Protein Coding	P11215	54	GC16P047820	7.82717	https://www.genecards.org/cgi-bin/carddisp.pl?gene=ITGAM
CPOX	Coproporphyrinogen Oxidase	Protein Coding	P36551	50	GC03M098576	7.82552	https://www.genecards.org/cgi-bin/carddisp.pl?gene=CPOX
PEX5	Peroxisomal Biogenesis Factor 5	Protein Coding	P50542	50	GC12P028333	7.82109	https://www.genecards.org/cgi-bin/carddisp.pl?gene=PEX5
HPRT1	Hypoxanthine Phosphoribosyltransferase 1	Protein Coding	P00492	55	GC0XP134460	7.81873	https://www.genecards.org/cgi-bin/carddisp.pl?gene=HPRT1
UCN2	Urocortin 2	Protein Coding	Q96RP3	38	GC03M048561	7.81715	https://www.genecards.org/cgi-bin/carddisp.pl?gene=UCN2
HBEGF	Heparin Binding EGF Like Growth Factor	Protein Coding	Q99075	50	GC05M140332	7.81638	https://www.genecards.org/cgi-bin/carddisp.pl?gene=HBEGF
LPL	Lipoprotein Lipase	Protein Coding	P06858	56	GC08P019901	7.81375	https://www.genecards.org/cgi-bin/carddisp.pl?gene=LPL
SPP1	Secreted Phosphoprotein 1	Protein Coding	P10451	52	GC04P087975	7.79516	https://www.genecards.org/cgi-bin/carddisp.pl?gene=SPP1
FTH1	Ferritin Heavy Chain 1	Protein Coding	P02794	57	GC11M061959	7.79136	https://www.genecards.org/cgi-bin/carddisp.pl?gene=FTH1
PSIP1	PC4 And SRSF1 Interacting Protein 1	Protein Coding	O75475	46	GC09M015464	7.78188	https://www.genecards.org/cgi-bin/carddisp.pl?gene=PSIP1
HDAC6	Histone Deacetylase 6	Protein Coding	Q9UBN7	60	GC0XP048801	7.7756	https://www.genecards.org/cgi-bin/carddisp.pl?gene=HDAC6
NEIL2	Nei Like DNA Glycosylase 2	Protein Coding	Q969S2	45	GC08P011769	7.76775	https://www.genecards.org/cgi-bin/carddisp.pl?gene=NEIL2
TFAM	Transcription Factor A, Mitochondrial	Protein Coding	Q00059	50	GC10P058385	7.76521	https://www.genecards.org/cgi-bin/carddisp.pl?gene=TFAM
TREM2	Triggering Receptor Expressed On Myeloid Cells 2	Protein Coding	Q9NZC2	51	GC06M081112	7.76168	https://www.genecards.org/cgi-bin/carddisp.pl?gene=TREM2
CD44	CD44 Molecule (Indian Blood Group)	Protein Coding	P16070	55	GC11P035139	7.75863	https://www.genecards.org/cgi-bin/carddisp.pl?gene=CD44
CYP3A7	Cytochrome P450 Family 3 Subfamily A Member 7	Protein Coding	P24462	47	GC07M099705	7.75365	https://www.genecards.org/cgi-bin/carddisp.pl?gene=CYP3A7
CCL5	C-C Motif Chemokine Ligand 5	Protein Coding	P13501	50	GC17M035871	7.74067	https://www.genecards.org/cgi-bin/carddisp.pl?gene=CCL5
GUCY1A2	Guanylate Cyclase 1 Soluble Subunit Alpha 2	Protein Coding	P33402	48	GC11M110049	7.73736	https://www.genecards.org/cgi-bin/carddisp.pl?gene=GUCY1A2
MTRR	5-Methyltetrahydrofolate-Homocysteine Methyltransferase Reductase	Protein Coding	Q9UBK8	51	GC05P007851	7.72076	https://www.genecards.org/cgi-bin/carddisp.pl?gene=MTRR
UCN	Urocortin	Protein Coding	P55089	42	GC02M027308	7.72074	https://www.genecards.org/cgi-bin/carddisp.pl?gene=UCN
VCL	Vinculin	Protein Coding	P18206	54	GC10P073995	7.71949	https://www.genecards.org/cgi-bin/carddisp.pl?gene=VCL
GH1	Growth Hormone 1	Protein Coding	P01241	50	GC17M063917	7.70293	https://www.genecards.org/cgi-bin/carddisp.pl?gene=GH1
GPX6	Glutathione Peroxidase 6	Protein Coding	P59796	40	GC06M028503	7.70262	https://www.genecards.org/cgi-bin/carddisp.pl?gene=GPX6
MAF	MAF BZIP Transcription Factor	Protein Coding	O75444	52	GC16M079204	7.69934	https://www.genecards.org/cgi-bin/carddisp.pl?gene=MAF
COA8	Cytochrome C Oxidase Assembly Factor 8	Protein Coding	Q96IL0	38	GC14P112159	7.69578	https://www.genecards.org/cgi-bin/carddisp.pl?gene=COA8
FH	Fumarate Hydratase	Protein Coding	P07954	53	GC01M241499	7.69576	https://www.genecards.org/cgi-bin/carddisp.pl?gene=FH
RUNX2	RUNX Family Transcription Factor 2	Protein Coding	Q13950	53	GC06P104322	7.69336	https://www.genecards.org/cgi-bin/carddisp.pl?gene=RUNX2
ATP5MK	ATP Synthase Membrane Subunit K	Protein Coding	Q96IX5	41	GC10M103397	7.68912	https://www.genecards.org/cgi-bin/carddisp.pl?gene=ATP5MK
GFAP	Glial Fibrillary Acidic Protein	Protein Coding	P14136	55	GC17M061018	7.68528	https://www.genecards.org/cgi-bin/carddisp.pl?gene=GFAP
CSF1	Colony Stimulating Factor 1	Protein Coding	P09603	51	GC01P109911	7.68503	https://www.genecards.org/cgi-bin/carddisp.pl?gene=CSF1
NUDT5	Nudix Hydrolase 5	Protein Coding	Q9UKK9	46	GC10M012165	7.68218	https://www.genecards.org/cgi-bin/carddisp.pl?gene=NUDT5
GSTM4	Glutathione S-Transferase Mu 4	Protein Coding	Q03013	46	GC01P109657	7.67785	https://www.genecards.org/cgi-bin/carddisp.pl?gene=GSTM4
KCNJ2	Potassium Inwardly Rectifying Channel Subfamily J Member 2	Protein Coding	P63252	55	GC17P070168	7.67658	https://www.genecards.org/cgi-bin/carddisp.pl?gene=KCNJ2
IGFBP1	Insulin Like Growth Factor Binding Protein 1	Protein Coding	P08833	50	GC07P048599	7.66543	https://www.genecards.org/cgi-bin/carddisp.pl?gene=IGFBP1
GSTM5	Glutathione S-Transferase Mu 5	Protein Coding	P46439	47	GC01P109711	7.65986	https://www.genecards.org/cgi-bin/carddisp.pl?gene=GSTM5
ADAMTS13	ADAM Metallopeptidase With Thrombospondin Type 1 Motif 13	Protein Coding	Q76LX8	54	GC09P133414	7.65534	https://www.genecards.org/cgi-bin/carddisp.pl?gene=ADAMTS13
PPP5C	Protein Phosphatase 5 Catalytic Subunit	Protein Coding	P53041	52	GC19P083509	7.63565	https://www.genecards.org/cgi-bin/carddisp.pl?gene=PPP5C
ATG9B	Autophagy Related 9B	Protein Coding	Q674R7	42	GC07M151012	7.6268	https://www.genecards.org/cgi-bin/carddisp.pl?gene=ATG9B
SLC25A1	Solute Carrier Family 25 Member 1	Protein Coding	P53007	52	GC22M019569	7.62181	https://www.genecards.org/cgi-bin/carddisp.pl?gene=SLC25A1
CDK1	Cyclin Dependent Kinase 1	Protein Coding	P06493	55	GC10P060772	7.6035	https://www.genecards.org/cgi-bin/carddisp.pl?gene=CDK1
CSNK2A1	Casein Kinase 2 Alpha 1	Protein Coding	P68400	57	GC20M000472	7.59705	https://www.genecards.org/cgi-bin/carddisp.pl?gene=CSNK2A1
ADRB3	Adrenoceptor Beta 3	Protein Coding	P13945	50	GC08M037962	7.59305	https://www.genecards.org/cgi-bin/carddisp.pl?gene=ADRB3
CDH5	Cadherin 5	Protein Coding	P33151	53	GC16P066366	7.5908	https://www.genecards.org/cgi-bin/carddisp.pl?gene=CDH5
CDC25C	Cell Division Cycle 25C	Protein Coding	P30307	54	GC05M138285	7.58696	https://www.genecards.org/cgi-bin/carddisp.pl?gene=CDC25C
F2	Coagulation Factor II, Thrombin	Protein Coding	P00734	57	GC11P046851	7.58539	https://www.genecards.org/cgi-bin/carddisp.pl?gene=F2
TGM2	Transglutaminase 2	Protein Coding	P21980	54	GC20M038127	7.58501	https://www.genecards.org/cgi-bin/carddisp.pl?gene=TGM2
KL	Klotho	Protein Coding	Q9UEF7	54	GC13P033016	7.58068	https://www.genecards.org/cgi-bin/carddisp.pl?gene=KL
ALPP	Alkaline Phosphatase, Placental	Protein Coding	P05187	50	GC02P232378	7.57594	https://www.genecards.org/cgi-bin/carddisp.pl?gene=ALPP
ACAA1	Acetyl-CoA Acyltransferase 1	Protein Coding	P09110	48	GC03M038103	7.56597	https://www.genecards.org/cgi-bin/carddisp.pl?gene=ACAA1
HSPA14	Heat Shock Protein Family A (Hsp70) Member 14	Protein Coding	Q0VDF9	46	GC10P014860	7.55998	https://www.genecards.org/cgi-bin/carddisp.pl?gene=HSPA14
ABCB1	ATP Binding Cassette Subfamily B Member 1	Protein Coding	P08183	58	GC07M087504	7.55511	https://www.genecards.org/cgi-bin/carddisp.pl?gene=ABCB1
TSC2	TSC Complex Subunit 2	Protein Coding	P49815	57	GC16P045943	7.55479	https://www.genecards.org/cgi-bin/carddisp.pl?gene=TSC2
SNAP25	Synaptosome Associated Protein 25	Protein Coding	P60880	56	GC20P010207	7.55479	https://www.genecards.org/cgi-bin/carddisp.pl?gene=SNAP25
IMMT	Inner Membrane Mitochondrial Protein	Protein Coding	Q16891	47	GC02M086144	7.55456	https://www.genecards.org/cgi-bin/carddisp.pl?gene=IMMT
ATF6B	Activating Transcription Factor 6 Beta	Protein Coding	Q99941	45	GC06M032115	7.54886	https://www.genecards.org/cgi-bin/carddisp.pl?gene=ATF6B
PON3	Paraoxonase 3	Protein Coding	Q15166	51	GC07M095359	7.54707	https://www.genecards.org/cgi-bin/carddisp.pl?gene=PON3
ADCY5	Adenylate Cyclase 5	Protein Coding	O95622	54	GC03M123282	7.54651	https://www.genecards.org/cgi-bin/carddisp.pl?gene=ADCY5
CXCL1	C-X-C Motif Chemokine Ligand 1	Protein Coding	P09341	49	GC04P073869	7.54379	https://www.genecards.org/cgi-bin/carddisp.pl?gene=CXCL1
SFPQ	Splicing Factor Proline And Glutamine Rich	Protein Coding	P23246	50	GC01M035176	7.53922	https://www.genecards.org/cgi-bin/carddisp.pl?gene=SFPQ
GAL	Galanin And GMAP Prepropeptide	Protein Coding	P22466	51	GC11P073118	7.53673	https://www.genecards.org/cgi-bin/carddisp.pl?gene=GAL
UQCRQ	Ubiquinol-Cytochrome C Reductase Complex III Subunit VII	Protein Coding	O14949	48	GC05P132866	7.52084	https://www.genecards.org/cgi-bin/carddisp.pl?gene=UQCRQ
PKP2	Plakophilin 2	Protein Coding	Q99959	51	GC12M032790	7.5195	https://www.genecards.org/cgi-bin/carddisp.pl?gene=PKP2
SELENOP	Selenoprotein P	Protein Coding	P49908	42	GC05M042800	7.51728	https://www.genecards.org/cgi-bin/carddisp.pl?gene=SELENOP
SYVN1	Synoviolin 1	Protein Coding	Q86TM6	47	GC11M109220	7.5172	https://www.genecards.org/cgi-bin/carddisp.pl?gene=SYVN1
MICA	MHC Class I Polypeptide-Related Sequence A	Protein Coding	Q29983	45	GC06P031399	7.49607	https://www.genecards.org/cgi-bin/carddisp.pl?gene=MICA
TEK	TEK Receptor Tyrosine Kinase	Protein Coding	Q02763	58	GC09P027109	7.49554	https://www.genecards.org/cgi-bin/carddisp.pl?gene=TEK
NDUFA12	NADH:Ubiquinone Oxidoreductase Subunit A12	Protein Coding	Q9UI09	51	GC12M094898	7.49507	https://www.genecards.org/cgi-bin/carddisp.pl?gene=NDUFA12
PRKD2	Protein Kinase D2	Protein Coding	Q9BZL6	53	GC19M046674	7.488	https://www.genecards.org/cgi-bin/carddisp.pl?gene=PRKD2
HGF	Hepatocyte Growth Factor	Protein Coding	P14210	58	GC07M081699	7.47752	https://www.genecards.org/cgi-bin/carddisp.pl?gene=HGF
EEF2	Eukaryotic Translation Elongation Factor 2	Protein Coding	P13639	55	GC19M003976	7.46547	https://www.genecards.org/cgi-bin/carddisp.pl?gene=EEF2
QDPR	Quinoid Dihydropteridine Reductase	Protein Coding	P09417	53	GC04M017460	7.45791	https://www.genecards.org/cgi-bin/carddisp.pl?gene=QDPR
BECN1	Beclin 1	Protein Coding	Q14457	53	GC17M042810	7.45617	https://www.genecards.org/cgi-bin/carddisp.pl?gene=BECN1
COX8A	Cytochrome C Oxidase Subunit 8A	Protein Coding	P10176	48	GC11P064124	7.45508	https://www.genecards.org/cgi-bin/carddisp.pl?gene=COX8A
HMGCL	3-Hydroxy-3-Methylglutaryl-CoA Lyase	Protein Coding	P35914	52	GC01M023801	7.45358	https://www.genecards.org/cgi-bin/carddisp.pl?gene=HMGCL
ESR2	Estrogen Receptor 2	Protein Coding	Q92731	56	GC14M064084	7.45245	https://www.genecards.org/cgi-bin/carddisp.pl?gene=ESR2
CHGA	Chromogranin A	Protein Coding	P10645	50	GC14P092962	7.4518	https://www.genecards.org/cgi-bin/carddisp.pl?gene=CHGA
CCK	Cholecystokinin	Protein Coding	P06307	48	GC03M042274	7.4484	https://www.genecards.org/cgi-bin/carddisp.pl?gene=CCK
TRAP1	TNF Receptor Associated Protein 1	Protein Coding	Q12931	50	GC16M010658	7.4374	https://www.genecards.org/cgi-bin/carddisp.pl?gene=TRAP1
TRIB3	Tribbles Pseudokinase 3	Protein Coding	Q96RU7	49	GC20P000361	7.40726	https://www.genecards.org/cgi-bin/carddisp.pl?gene=TRIB3
LPA	Lipoprotein(A)	Protein Coding	P08519	46	GC06M160531	7.40478	https://www.genecards.org/cgi-bin/carddisp.pl?gene=LPA
GSTZ1	Glutathione S-Transferase Zeta 1	Protein Coding	O43708	49	GC14P077320	7.40131	https://www.genecards.org/cgi-bin/carddisp.pl?gene=GSTZ1
VKORC1L1	Vitamin K Epoxide Reductase Complex Subunit 1 Like 1	Protein Coding	Q8N0U8	45	GC07P079275	7.39826	https://www.genecards.org/cgi-bin/carddisp.pl?gene=VKORC1L1
ANGPT2	Angiopoietin 2	Protein Coding	O15123	56	GC08M006499	7.39707	https://www.genecards.org/cgi-bin/carddisp.pl?gene=ANGPT2
TALDO1	Transaldolase 1	Protein Coding	P37837	53	GC11P002866	7.395	https://www.genecards.org/cgi-bin/carddisp.pl?gene=TALDO1
EZH2	Enhancer Of Zeste 2 Polycomb Repressive Complex 2 Subunit	Protein Coding	Q15910	60	GC07M148807	7.39183	https://www.genecards.org/cgi-bin/carddisp.pl?gene=EZH2
SLC1A1	Solute Carrier Family 1 Member 1	Protein Coding	P43005	56	GC09P004490	7.38863	https://www.genecards.org/cgi-bin/carddisp.pl?gene=SLC1A1
ZC3H12A	Zinc Finger CCCH-Type Containing 12A	Protein Coding	Q5D1E8	45	GC01P037474	7.37778	https://www.genecards.org/cgi-bin/carddisp.pl?gene=ZC3H12A
TGFB2	Transforming Growth Factor Beta 2	Protein Coding	P61812	58	GC01P218345	7.37354	https://www.genecards.org/cgi-bin/carddisp.pl?gene=TGFB2
RANBP2	RAN Binding Protein 2	Protein Coding	P49792	53	GC02P108719	7.36764	https://www.genecards.org/cgi-bin/carddisp.pl?gene=RANBP2
ARNT	Aryl Hydrocarbon Receptor Nuclear Translocator	Protein Coding	P27540	52	GC01M150809	7.36605	https://www.genecards.org/cgi-bin/carddisp.pl?gene=ARNT
FUS	FUS RNA Binding Protein	Protein Coding	P35637	51	GC16P031180	7.36303	https://www.genecards.org/cgi-bin/carddisp.pl?gene=FUS
BMI1	BMI1 Proto-Oncogene, Polycomb Ring Finger	Protein Coding	P35226	49	GC10P022326	7.35447	https://www.genecards.org/cgi-bin/carddisp.pl?gene=BMI1
ATXN2	Ataxin 2	Protein Coding	Q99700	50	GC12M111443	7.35396	https://www.genecards.org/cgi-bin/carddisp.pl?gene=ATXN2
OGFOD1	2-Oxoglutarate And Iron Dependent Oxygenase Domain Containing 1	Protein Coding	Q8N543	44	GC16P056454	7.34859	https://www.genecards.org/cgi-bin/carddisp.pl?gene=OGFOD1
KMT2B	Lysine Methyltransferase 2B	Protein Coding	Q9UMN6	46	GC19P083157	7.34494	https://www.genecards.org/cgi-bin/carddisp.pl?gene=KMT2B
EDNRB	Endothelin Receptor Type B	Protein Coding	P24530	57	GC13M077895	7.34058	https://www.genecards.org/cgi-bin/carddisp.pl?gene=EDNRB
ANXA2	Annexin A2	Protein Coding	P07355	54	GC15M060347	7.33868	https://www.genecards.org/cgi-bin/carddisp.pl?gene=ANXA2
ATXN3	Ataxin 3	Protein Coding	P54252	52	GC14M115245	7.33851	https://www.genecards.org/cgi-bin/carddisp.pl?gene=ATXN3
ME1	Malic Enzyme 1	Protein Coding	P48163	48	GC06M083210	7.32633	https://www.genecards.org/cgi-bin/carddisp.pl?gene=ME1
SUCLA2	Succinate-CoA Ligase ADP-Forming Subunit Beta	Protein Coding	Q9P2R7	53	GC13M047745	7.32534	https://www.genecards.org/cgi-bin/carddisp.pl?gene=SUCLA2
PPP1R15B	Protein Phosphatase 1 Regulatory Subunit 15B	Protein Coding	Q5SWA1	44	GC01M204604	7.31615	https://www.genecards.org/cgi-bin/carddisp.pl?gene=PPP1R15B
CHEK2	Checkpoint Kinase 2	Protein Coding	O96017	61	GC22M028687	7.31422	https://www.genecards.org/cgi-bin/carddisp.pl?gene=CHEK2
RNASE3	Ribonuclease A Family Member 3	Protein Coding	P12724	46	GC14P020891	7.29191	https://www.genecards.org/cgi-bin/carddisp.pl?gene=RNASE3
REST	RE1 Silencing Transcription Factor	Protein Coding	Q13127	50	GC04P056907	7.27948	https://www.genecards.org/cgi-bin/carddisp.pl?gene=REST
YBX1	Y-Box Binding Protein 1	Protein Coding	P67809	47	GC01P042682	7.27412	https://www.genecards.org/cgi-bin/carddisp.pl?gene=YBX1
GSTO2	Glutathione S-Transferase Omega 2	Protein Coding	Q9H4Y5	48	GC10P104268	7.26304	https://www.genecards.org/cgi-bin/carddisp.pl?gene=GSTO2
FOSB	FosB Proto-Oncogene, AP-1 Transcription Factor Subunit	Protein Coding	P53539	49	GC19P045467	7.2624	https://www.genecards.org/cgi-bin/carddisp.pl?gene=FOSB
HSPG2	Heparan Sulfate Proteoglycan 2	Protein Coding	P98160	54	GC01M021822	7.26068	https://www.genecards.org/cgi-bin/carddisp.pl?gene=HSPG2
TNFSF11	TNF Superfamily Member 11	Protein Coding	O14788	56	GC13P042562	7.25874	https://www.genecards.org/cgi-bin/carddisp.pl?gene=TNFSF11
SORD	Sorbitol Dehydrogenase	Protein Coding	Q00796	54	GC15P045023	7.25496	https://www.genecards.org/cgi-bin/carddisp.pl?gene=SORD
CYP20A1	Cytochrome P450 Family 20 Subfamily A Member 1	Protein Coding	Q6UW02	44	GC02P203238	7.2393	https://www.genecards.org/cgi-bin/carddisp.pl?gene=CYP20A1
NPC1	NPC Intracellular Cholesterol Transporter 1	Protein Coding	O15118	56	GC18M023506	7.2392	https://www.genecards.org/cgi-bin/carddisp.pl?gene=NPC1
SLC25A3	Solute Carrier Family 25 Member 3	Protein Coding	Q00325	51	GC12P098593	7.23431	https://www.genecards.org/cgi-bin/carddisp.pl?gene=SLC25A3
COL2A1	Collagen Type II Alpha 1 Chain	Protein Coding	P02458	57	GC12M047972	7.22476	https://www.genecards.org/cgi-bin/carddisp.pl?gene=COL2A1
MICAL1	Microtubule Associated Monooxygenase, Calponin And LIM Domain Containing 1	Protein Coding	Q8TDZ2	49	GC06M109444	7.22009	https://www.genecards.org/cgi-bin/carddisp.pl?gene=MICAL1
ADA	Adenosine Deaminase	Protein Coding	P00813	58	GC20M044620	7.21136	https://www.genecards.org/cgi-bin/carddisp.pl?gene=ADA
ELK1	ETS Transcription Factor ELK1	Protein Coding	P19419	50	GC0XM047635	7.21033	https://www.genecards.org/cgi-bin/carddisp.pl?gene=ELK1
HDAC9	Histone Deacetylase 9	Protein Coding	Q9UKV0	56	GC07P018086	7.20912	https://www.genecards.org/cgi-bin/carddisp.pl?gene=HDAC9
MBL2	Mannose Binding Lectin 2	Protein Coding	P11226	53	GC10M052760	7.20692	https://www.genecards.org/cgi-bin/carddisp.pl?gene=MBL2
TRIM21	Tripartite Motif Containing 21	Protein Coding	P19474	50	GC11M004384	7.20643	https://www.genecards.org/cgi-bin/carddisp.pl?gene=TRIM21
PPOX	Protoporphyrinogen Oxidase	Protein Coding	P50336	50	GC01P161944	7.20387	https://www.genecards.org/cgi-bin/carddisp.pl?gene=PPOX
KLF4	KLF Transcription Factor 4	Protein Coding	O43474	53	GC09M107484	7.19957	https://www.genecards.org/cgi-bin/carddisp.pl?gene=KLF4
BRF2	BRF2 RNA Polymerase III Transcription Initiation Factor Subunit	Protein Coding	Q9HAW0	44	GC08M037820	7.1925	https://www.genecards.org/cgi-bin/carddisp.pl?gene=BRF2
TSPO	Translocator Protein	Protein Coding	B1AH88	51	GC22P043151	7.18149	https://www.genecards.org/cgi-bin/carddisp.pl?gene=TSPO
RET	Ret Proto-Oncogene	Protein Coding	P07949	61	GC10P043402	7.18124	https://www.genecards.org/cgi-bin/carddisp.pl?gene=RET
SREBF1	Sterol Regulatory Element Binding Transcription Factor 1	Protein Coding	P36956	55	GC17M017810	7.17774	https://www.genecards.org/cgi-bin/carddisp.pl?gene=SREBF1
PSMA7	Proteasome 20S Subunit Alpha 7	Protein Coding	O14818	51	GC20M062136	7.17531	https://www.genecards.org/cgi-bin/carddisp.pl?gene=PSMA7
MMP13	Matrix Metallopeptidase 13	Protein Coding	P45452	57	GC11M102942	7.17504	https://www.genecards.org/cgi-bin/carddisp.pl?gene=MMP13
MGST2	Microsomal Glutathione S-Transferase 2	Protein Coding	Q99735	48	GC04P139665	7.17219	https://www.genecards.org/cgi-bin/carddisp.pl?gene=MGST2
SYNPO2	Synaptopodin 2	Protein Coding	Q9UMS6	44	GC04P118850	7.16596	https://www.genecards.org/cgi-bin/carddisp.pl?gene=SYNPO2
UCN3	Urocortin 3	Protein Coding	Q969E3	42	GC10P005364	7.16554	https://www.genecards.org/cgi-bin/carddisp.pl?gene=UCN3
IRF1	Interferon Regulatory Factor 1	Protein Coding	P10914	53	GC05M132440	7.16444	https://www.genecards.org/cgi-bin/carddisp.pl?gene=IRF1
YY1	YY1 Transcription Factor	Protein Coding	P25490	55	GC14P100238	7.16211	https://www.genecards.org/cgi-bin/carddisp.pl?gene=YY1
IL3	Interleukin 3	Protein Coding	P08700	52	GC05P132060	7.16105	https://www.genecards.org/cgi-bin/carddisp.pl?gene=IL3
PLCG2	Phospholipase C Gamma 2	Protein Coding	P16885	58	GC16P081773	7.15352	https://www.genecards.org/cgi-bin/carddisp.pl?gene=PLCG2
NAGLU	N-Acetyl-Alpha-Glucosaminidase	Protein Coding	P54802	50	GC17P078080	7.15134	https://www.genecards.org/cgi-bin/carddisp.pl?gene=NAGLU
ANG	Angiogenin	Protein Coding	P03950	52	GC14P038248	7.14695	https://www.genecards.org/cgi-bin/carddisp.pl?gene=ANG
SMAD4	SMAD Family Member 4	Protein Coding	Q13485	60	GC18P051028	7.14022	https://www.genecards.org/cgi-bin/carddisp.pl?gene=SMAD4
TP73	Tumor Protein P73	Protein Coding	O15350	52	GC01P003652	7.13625	https://www.genecards.org/cgi-bin/carddisp.pl?gene=TP73
CAMK2A	Calcium/Calmodulin Dependent Protein Kinase II Alpha	Protein Coding	Q9UQM7	59	GC05M150219	7.13434	https://www.genecards.org/cgi-bin/carddisp.pl?gene=CAMK2A
CXCR4	C-X-C Motif Chemokine Receptor 4	Protein Coding	P61073	59	GC02M136114	7.12637	https://www.genecards.org/cgi-bin/carddisp.pl?gene=CXCR4
ACE2	Angiotensin Converting Enzyme 2	Protein Coding	Q9BYF1	56	GC0XM015494	7.1237	https://www.genecards.org/cgi-bin/carddisp.pl?gene=ACE2
CHKA	Choline Kinase Alpha	Protein Coding	P35790	50	GC11M068052	7.11825	https://www.genecards.org/cgi-bin/carddisp.pl?gene=CHKA
CCNA2	Cyclin A2	Protein Coding	P20248	52	GC04M121816	7.11785	https://www.genecards.org/cgi-bin/carddisp.pl?gene=CCNA2
S1PR1	Sphingosine-1-Phosphate Receptor 1	Protein Coding	P21453	52	GC01P101236	7.11146	https://www.genecards.org/cgi-bin/carddisp.pl?gene=S1PR1
SELL	Selectin L	Protein Coding	P14151	49	GC01M169690	7.10445	https://www.genecards.org/cgi-bin/carddisp.pl?gene=SELL
PSEN2	Presenilin 2	Protein Coding	P49810	56	GC01P226870	7.09329	https://www.genecards.org/cgi-bin/carddisp.pl?gene=PSEN2
IL12B	Interleukin 12B	Protein Coding	P29460	52	GC05M159314	7.09174	https://www.genecards.org/cgi-bin/carddisp.pl?gene=IL12B
MAPK7	Mitogen-Activated Protein Kinase 7	Protein Coding	Q13164	54	GC17P076099	7.08897	https://www.genecards.org/cgi-bin/carddisp.pl?gene=MAPK7
NAT2	N-Acetyltransferase 2	Protein Coding	P11245	48	GC08P018391	7.0868	https://www.genecards.org/cgi-bin/carddisp.pl?gene=NAT2
TUBA1B	Tubulin Alpha 1b	Protein Coding	P68363	50	GC12M049127	7.08634	https://www.genecards.org/cgi-bin/carddisp.pl?gene=TUBA1B
SLPI	Secretory Leukocyte Peptidase Inhibitor	Protein Coding	P03973	47	GC20M045252	7.08565	https://www.genecards.org/cgi-bin/carddisp.pl?gene=SLPI
ACACA	Acetyl-CoA Carboxylase Alpha	Protein Coding	Q13085	55	GC17M037084	7.08476	https://www.genecards.org/cgi-bin/carddisp.pl?gene=ACACA
FYN	FYN Proto-Oncogene, Src Family Tyrosine Kinase	Protein Coding	P06241	54	GC06M111660	7.08287	https://www.genecards.org/cgi-bin/carddisp.pl?gene=FYN
ATP5PF	ATP Synthase Peripheral Stalk Subunit F6	Protein Coding	P18859	46	GC21M026064	7.07504	https://www.genecards.org/cgi-bin/carddisp.pl?gene=ATP5PF
HRH2	Histamine Receptor H2	Protein Coding	P25021	50	GC05P175659	7.07186	https://www.genecards.org/cgi-bin/carddisp.pl?gene=HRH2
ADCYAP1R1	ADCYAP Receptor Type I	Protein Coding	P41586	52	GC07P031058	7.06002	https://www.genecards.org/cgi-bin/carddisp.pl?gene=ADCYAP1R1
TNFAIP8L1	TNF Alpha Induced Protein 8 Like 1	Protein Coding	Q8WVP5	39	GC19P004639	7.05961	https://www.genecards.org/cgi-bin/carddisp.pl?gene=TNFAIP8L1
PDGFB	Platelet Derived Growth Factor Subunit B	Protein Coding	P01127	58	GC22M069031	7.05892	https://www.genecards.org/cgi-bin/carddisp.pl?gene=PDGFB
PDYN	Prodynorphin	Protein Coding	P01213	52	GC20M001978	7.05133	https://www.genecards.org/cgi-bin/carddisp.pl?gene=PDYN
PDK1	Pyruvate Dehydrogenase Kinase 1	Protein Coding	Q15118	53	GC02P172555	7.05071	https://www.genecards.org/cgi-bin/carddisp.pl?gene=PDK1
AKT2	AKT Serine/Threonine Kinase 2	Protein Coding	P31751	61	GC19M040230	7.04677	https://www.genecards.org/cgi-bin/carddisp.pl?gene=AKT2
RORA	RAR Related Orphan Receptor A	Protein Coding	P35398	55	GC15M060488	7.03452	https://www.genecards.org/cgi-bin/carddisp.pl?gene=RORA
NDUFAB1	NADH:Ubiquinone Oxidoreductase Subunit AB1	Protein Coding	O14561	48	GC16M024322	7.03367	https://www.genecards.org/cgi-bin/carddisp.pl?gene=NDUFAB1
LGALS3	Galectin 3	Protein Coding	P17931	52	GC14P055124	7.02771	https://www.genecards.org/cgi-bin/carddisp.pl?gene=LGALS3
APOA2	Apolipoprotein A2	Protein Coding	P02652	52	GC01M161222	7.02307	https://www.genecards.org/cgi-bin/carddisp.pl?gene=APOA2
BBC3	BCL2 Binding Component 3	Protein Coding	Q96PG8	46	GC19M047220	7.02253	https://www.genecards.org/cgi-bin/carddisp.pl?gene=BBC3
CFLAR	CASP8 And FADD Like Apoptosis Regulator	Protein Coding	O15519	51	GC02P201341	7.01456	https://www.genecards.org/cgi-bin/carddisp.pl?gene=CFLAR
CACNA1A	Calcium Voltage-Gated Channel Subunit Alpha1 A	Protein Coding	O00555	55	GC19M013206	7.01306	https://www.genecards.org/cgi-bin/carddisp.pl?gene=CACNA1A

## Sheet: Table S3
TableS3. Pathological Features and Deep Feature Matrix.
Sample ID	Total_Granularity_10_Eosin	Total_Granularity_10_Hematoxylin	Total_Granularity_10_OrigGray	Total_Granularity_11_Eosin	Total_Granularity_11_Hematoxylin	Total_Granularity_11_OrigGray	Total_Granularity_12_Eosin	Total_Granularity_12_Hematoxylin	Total_Granularity_12_OrigGray	Total_Granularity_13_Eosin	Total_Granularity_13_Hematoxylin	Total_Granularity_13_OrigGray	Total_Granularity_14_Eosin	Total_Granularity_14_Hematoxylin	Total_Granularity_14_OrigGray	Total_Granularity_15_Eosin	Total_Granularity_15_Hematoxylin	Total_Granularity_15_OrigGray	Total_Granularity_16_Eosin	Total_Granularity_16_Hematoxylin	Total_Granularity_16_OrigGray	Total_Granularity_1_Eosin	Total_Granularity_1_Hematoxylin	Total_Granularity_1_OrigGray	Total_Granularity_2_Eosin	Total_Granularity_2_Hematoxylin	Total_Granularity_2_OrigGray	Total_Granularity_3_Eosin	Total_Granularity_3_Hematoxylin	Total_Granularity_3_OrigGray	Total_Granularity_4_Eosin	Total_Granularity_4_Hematoxylin	Total_Granularity_4_OrigGray	Total_Granularity_5_Eosin	Total_Granularity_5_Hematoxylin	Total_Granularity_5_OrigGray	Total_Granularity_6_Eosin	Total_Granularity_6_Hematoxylin	Total_Granularity_6_OrigGray	Total_Granularity_7_Eosin	Total_Granularity_7_Hematoxylin	Total_Granularity_7_OrigGray	Total_Granularity_8_Eosin	Total_Granularity_8_Hematoxylin	Total_Granularity_8_OrigGray	Total_Granularity_9_Eosin	Total_Granularity_9_Hematoxylin	Total_Granularity_9_OrigGray	Total_Intensity_LowerQuartileIntensity_Eosin
TCGA-2V-A95S	3.31868	3.58908	2.20985	2.8218	4.62383	5.76584	1.81413	3.59886	2.09163	3.03273	2.88778	5.61938	2.78662	4.1122	3.67658	3.2335	2.1833	5.21561	0.456596	2.62681	4.23349	17.1348	15.7643	8.94032	7.44944	6.81766	4.13583	4.01769	3.3321	1.72245	3.66252	2.71434	1.82739	2.76726	3.76747	2.4478	3.05755	4.54884	3.38903	2.67935	4.08239	5.23213	0.910239	7.26263	6.01969	0.77472	2.34988	1.27486	0.137178
TCGA-2Y-A9GS	3.80925	3.96308	7.61141	4.99743	3.205	3.21888	2.16753	3.03073	0.849264	3.84523	1.99935	2.49271	2.84492	1.65316	2.77733	3.88736	0.358136	3.32931	3.32636	0.633247	8.56473	7.11173	22.4405	14.0782	3.68036	10.277	6.56103	1.6687	4.49618	2.77531	2.6648	9.06797	4.36151	4.30879	9.42627	4.81637	2.13088	6.58499	5.89693	4.96582	5.4384	5.13897	8.10119	9.74963	1.19174	6.31703	4.30436	3.53263	0.456173
TCGA-2Y-A9GT	7.11665	3.82608	4.21821	6.73961	4.69742	1.42697	3.77552	3.4077	2.67694	2.63173	4.82513	4.87683	4.3456	2.02119	0.15931	3.96259	4.33806	3.3265	1.78711	0.911925	2.91768	9.21519	14.7797	10.5442	4.3668	6.68904	4.07597	2.30788	2.63409	1.20243	3.78997	5.63737	0.586705	4.19556	6.14033	0.181999	7.36954	7.23441	0.28795	6.87114	9.54992	0.912742	9.03328	6.18236	4.39169	4.68365	4.31905	0.91555	0.147411
TCGA-2Y-A9GU	4.79712	3.422	4.9777	5.4391	5.61928	7.89913	5.21143	3.59581	4.84394	6.21594	5.23624	3.27254	5.44231	3.26262	5.04574	2.61539	2.89661	6.48536	4.68923	2.52822	3.2713	7.86543	17.6906	9.22084	3.46046	7.68755	3.87467	1.72331	3.0831	2.01058	1.38614	2.28437	1.56337	1.02023	4.04973	2.1912	2.48598	4.56589	2.804	0.915031	5.403	3.81174	2.19803	3.75486	4.55615	6.01983	2.58751	8.16129	0.303763
TCGA-2Y-A9GV	3.24229	3.33911	2.69762	8.24913	4.93168	2.33307	8.78554	3.56151	2.61917	4.49804	2.59749	3.21422	1.46742	2.83616	2.75715	2.79563	1.45493	0.966353	2.35189	5.27409	5.73783	8.74054	14.5312	11.1141	4.3545	4.7833	3.82575	2.19275	2.27932	1.73316	2.24072	2.57322	1.8825	4.36783	6.3202	2.88159	4.1367	5.84319	2.89097	5.73806	5.91182	2.12831	5.05907	4.71411	2.37524	4.82871	8.76818	3.46484	0.255714
TCGA-2Y-A9GW	4.24318	2.2034	6.22816	3.18745	4.61284	2.35029	6.05624	3.04072	1.94497	5.3737	5.71132	8.34224	4.4556	0.942974	3.96328	4.81357	2.29328	3.8711	3.04595	1.5539	1.49612	12.781	19.5429	9.28199	5.39265	7.82271	4.31751	2.33265	4.10173	2.1034	2.81128	3.87686	1.14791	5.24231	3.20728	1.68109	5.48419	5.89623	5.15235	5.52658	1.9845	5.19868	5.00772	3.823	8.51907	5.29634	5.61583	6.09504	0.166555
TCGA-2Y-A9GX	5.67093	5.55554	4.21749	5.95299	3.94904	2.04622	5.11951	2.31081	3.58127	3.12062	6.30837	1.6585	4.01246	2.59424	4.99616	4.73446	4.89022	6.1871	9.51617	2.09832	4.1079	13.2104	15.423	12.3826	5.94477	7.1152	5.46097	2.89174	2.84801	2.70976	3.00332	3.06326	1.86823	6.03308	5.54566	3.0813	6.34468	2.83408	7.41148	5.5863	6.34833	8.21682	5.05177	2.86214	6.03028	5.56625	3.2907	9.00577	0.16488
TCGA-2Y-A9GY	6.42268	5.03767	4.31518	2.34111	3.68719	2.54971	3.99307	3.90066	1.99625	5.88152	2.55328	2.33465	1.14338	3.52002	1.5691	0.567219	2.26353	2.20176	6.10799	2.593	0.93545	11.3937	13.6216	13.0818	4.9753	7.89945	5.54998	2.3537	3.21252	2.55284	1.98846	3.98486	1.87526	3.9621	4.58097	3.6379	5.09617	4.49141	3.34236	3.51475	5.39835	2.39926	4.57114	3.46214	2.62122	1.94389	6.95846	2.59811	0.213149
TCGA-2Y-A9GZ	3.52468	4.10968	3.59191	1.60736	6.49665	2.51627	4.17314	3.45173	4.60111	3.677	3.05801	6.67915	6.15849	2.05254	5.30937	2.08103	2.91388	2.23091	3.04014	2.75857	1.03558	8.24744	19.7706	11.3656	3.86441	8.82812	5.27989	1.71634	2.49497	2.62702	1.52044	2.12977	3.51972	2.00531	5.61743	13.297	5.39357	5.20444	13.9741	2.05547	2.6026	7.5795	2.96131	5.52809	3.7688	5.00741	5.53673	2.16314	0.500802
TCGA-2Y-A9H0	4.66696	3.72446	4.95127	4.77756	3.24425	5.05597	5.25556	4.55333	3.82726	3.05009	2.14502	5.93855	2.13777	4.08793	0.829769	4.64275	2.66725	0.564336	8.88336	3.46503	5.56727	9.55827	16.0969	12.9907	4.13533	7.19293	5.1858	1.96956	2.75578	2.31006	1.61186	4.60723	2.60811	2.14206	3.83909	5.11298	4.5348	8.15908	7.00563	3.5382	4.99745	5.37837	5.79679	5.33462	3.10285	2.28586	1.82637	6.23728	0.335989
TCGA-2Y-A9H1	5.55626	1.5886	9.63667	4.85007	2.48608	5.91633	2.26198	3.7078	3.97333	4.56727	5.63782	5.82566	5.98762	2.53732	9.65328	5.50441	2.47328	2.72772	1.61029	1.15705	4.36325	8.19343	19.7919	10.9531	3.61842	8.06445	4.47475	2.17812	4.2428	2.60886	3.05313	4.97565	1.90889	3.30114	4.6144	3.16513	3.98171	4.10576	2.56412	5.10987	3.55713	3.81399	4.21964	6.61918	6.9741	5.32847	2.77257	2.73082	0.329401
TCGA-2Y-A9H2	5.32513	2.48276	1.92067	3.28005	3.66252	2.88554	3.2373	2.9573	4.45781	3.7504	3.20241	5.23669	3.32362	0.931595	1.88323	4.92923	4.21925	2.84086	1.33667	2.90516	2.80298	8.74041	14.2636	10.9072	3.82224	10.2199	4.70326	1.95558	3.27366	2.33065	1.58553	2.83887	2.49631	3.65441	2.87922	3.56448	3.27259	4.18568	5.58642	5.27224	5.5705	7.78281	5.99287	3.82815	5.00421	4.14649	5.89291	4.23455	0.390109
TCGA-2Y-A9H3	6.65349	4.01159	2.63984	4.14175	6.47468	4.60217	0.9819	3.26807	2.66061	4.19203	2.95604	3.95935	6.37666	2.90304	2.95189	4.85832	2.94703	1.84101	4.58167	2.06469	3.98903	8.94339	15.4479	13.3183	4.30092	8.91048	5.55299	2.17774	2.45751	2.71454	0.999555	3.92014	4.3552	3.0232	2.98529	7.46228	3.32432	4.50001	10.7623	4.51056	3.40336	6.82305	5.00391	4.65744	6.49074	6.42517	6.99441	5.37592	0.429563
TCGA-2Y-A9H4	4.40858	3.92506	8.71327	4.86704	1.99543	4.12215	4.7801	4.08501	6.55223	4.64129	1.97286	1.14738	4.25183	2.65927	4.03585	3.36187	3.48947	5.44466	1.92966	1.78798	1.90225	9.29978	21.5617	11.8331	4.24825	9.66023	4.58605	1.79089	3.86354	1.51648	3.44289	7.90023	2.25195	3.37116	5.62088	2.66589	7.60314	6.41166	3.74841	6.52155	4.05341	7.54516	7.28196	4.4739	5.72472	2.54051	4.30107	2.12519	0.307015
TCGA-2Y-A9H5	5.59342	4.39481	7.70103	4.26768	6.60846	4.62867	3.75839	4.27742	5.3905	2.78986	3.79741	1.16328	5.13344	4.08374	2.13249	2.604	4.88511	2.23737	4.65872	1.78954	2.93467	8.44785	11.6396	15.0558	4.00955	6.49833	7.01142	2.0829	2.87228	2.89269	1.47469	2.50662	1.99611	1.96028	6.06446	4.35206	4.05003	5.42235	3.02782	3.35243	3.65831	5.78546	5.92825	3.11924	4.37051	6.96679	5.53585	2.71427	0.314691
TCGA-2Y-A9H6	4.45395	5.60919	9.81848	2.45156	6.17842	5.84194	5.24289	6.32039	2.83092	5.05357	1.99691	5.54666	1.7234	2.13217	3.43925	4.98372	1.95091	1.48127	3.02161	0.597376	1.85121	6.92329	13.4491	15.9598	3.2546	7.37291	6.47698	1.74412	3.56936	2.58508	1.5857	4.89704	2.75485	2.71931	5.56168	1.82634	2.76714	4.85296	3.64091	3.58632	6.53814	5.42785	3.89532	2.58243	7.26175	5.76806	4.91935	8.34093	0.468641
TCGA-2Y-A9H7	4.32441	3.51579	3.4719	5.10318	6.34703	2.52093	5.0011	3.53886	1.84703	3.22142	2.724	1.05276	2.45452	3.45989	1.9534	5.64741	2.14437	3.07038	2.68	0.940757	3.98174	9.39499	15.3677	14.622	4.36732	6.66677	6.17655	1.80869	3.17102	2.4846	3.04775	3.76173	0.968776	4.59096	7.83267	5.48451	3.7968	6.01126	6.29399	5.81238	5.62128	6.9785	6.35765	6.04776	3.81695	4.99008	3.68559	1.57212	0.309279
TCGA-2Y-A9H8	4.41616	3.33716	1.79134	4.66455	2.61636	4.08208	4.05343	3.81055	2.0192	3.34054	3.36348	3.63238	2.7124	2.82719	4.45246	3.5844	3.7774	2.11385	0.676308	5.06271	4.23387	8.5423	11.5303	13.4579	3.44412	6.29173	6.10231	1.3742	2.33773	2.68697	1.9297	2.36243	3.90393	1.13029	3.3187	2.33547	4.11905	1.71361	2.51199	2.18135	2.38615	2.57485	4.19591	2.38975	3.2866	1.63562	4.19852	4.55333	0.424169
TCGA-2Y-A9H9	4.82815	2.92582	5.19956	5.12931	4.35751	4.01776	1.38565	2.78772	6.08579	2.93008	3.14844	3.98729	7.31207	4.68543	3.9452	2.09453	1.65762	5.78738	6.91836	4.79376	3.90601	8.4145	7.3584	15.8874	3.61922	3.0675	5.24514	1.81737	1.55474	2.40633	1.94029	2.04628	2.4798	1.21977	1.5028	2.62349	3.08649	1.61858	3.12715	3.16414	2.32992	3.0213	3.50377	3.20555	1.95789	3.65937	0.463855	4.81264	0.353981
TCGA-2Y-A9HA	1.91857	4.0718	3.77307	6.46617	2.9946	2.47107	2.11168	5.42157	3.88021	4.63061	6.25976	3.03007	2.25544	3.69217	6.49636	3.32248	1.79731	1.61724	3.3256	2.59811	2.29437	7.62658	15.6465	12.1633	3.20886	7.16654	4.79103	1.43598	2.84565	2.25342	2.05263	1.81754	3.35741	4.43178	3.6727	4.3993	2.96093	3.59844	8.76862	4.68106	6.50793	6.93189	6.55891	6.72777	7.23894	2.83325	5.6403	2.57459	0.439114
TCGA-2Y-A9HB	2.93739	3.2959	3.71075	5.89328	3.75772	1.7993	3.03155	2.44385	2.55214	3.97108	1.59099	2.18191	3.68611	3.56899	2.34195	7.69801	3.66593	4.91171	4.87169	0.0750401	4.61258	8.97286	15.8318	10.6009	4.07367	7.22331	3.88792	2.08494	2.84845	1.83073	1.93295	2.12926	1.37716	1.5842	4.5376	1.04789	2.58027	3.61602	1.93898	2.81923	6.67123	3.57294	3.59945	6.08146	7.78844	6.60397	2.67759	5.66196	0.379276
TCGA-4R-AA8I	2.35595	2.67516	5.66581	4.27317	4.81229	2.7228	10.4128	0.896947	2.55415	4.78841	2.15363	1.74426	4.21221	3.12324	1.9535	3.63504	1.57472	0.178386	2.5045	1.11467	1.49571	12.0578	15.7858	14.1279	5.94472	10.812	7.64555	2.52351	6.21379	3.69775	3.05499	8.9561	3.33627	5.32477	6.69423	3.63105	7.32009	8.61293	8.84166	5.39118	5.94911	3.00152	5.69411	3.73727	6.56719	8.71964	4.26242	4.56645	0.257405
TCGA-5C-A9VG	3.24273	5.73248	4.59772	6.0388	7.19784	3.31584	4.69035	2.29327	6.65798	8.76633	2.65505	2.28804	3.00642	1.76261	2.37944	1.32064	3.31249	0.684973	3.5318	6.96913	0.570885	7.65372	10.6995	16.6752	3.7569	6.29857	6.81318	2.09663	2.87758	2.96824	3.06437	4.60164	6.09317	2.39613	6.11004	6.65934	8.25792	4.45458	7.84621	3.78587	7.92615	6.39378	4.58939	3.05742	4.99332	4.43396	3.93033	4.8936	0.423017
TCGA-5C-A9VH	1.56794	1.7466	5.89462	5.41799	2.56727	2.42901	5.77176	1.52483	4.38121	1.03814	4.84669	7.19745	3.77863	6.07079	1.99366	3.70833	3.56921	6.28046	3.86899	1.89679	2.77521	5.9013	27.4557	7.22089	2.72498	6.60087	2.71009	1.12567	1.72463	1.03667	0.901694	2.53752	1.09535	1.28597	3.84713	2.71027	2.36045	4.19216	1.93418	2.11686	4.86754	8.90411	4.50947	4.05962	3.64848	5.5482	4.00991	4.79843	0.488529
TCGA-5C-AAPD	10.8995	3.27405	0.859914	3.37512	1.97102	4.79416	5.06088	2.26078	8.12108	4.53713	3.57006	2.98417	7.94307	2.90411	3.13545	9.44395	1.76474	4.3029	1.82896	1.01407	1.99754	9.5223	14.1732	10.7939	4.2113	7.91777	5.02496	2.08762	4.11098	2.30974	1.88736	2.34589	2.33294	2.36272	4.06833	1.87469	6.34397	3.00788	2.68612	5.77825	4.2612	4.79039	5.36107	3.19785	4.42247	6.15088	3.69208	7.86462	0.284904
TCGA-5R-AA1C	5.48219	2.61932	3.14237	2.82037	3.70738	1.96886	6.38604	2.71277	1.14956	4.13787	3.83031	1.6968	4.0389	2.11155	2.68663	7.61674	2.34428	1.32313	5.27218	3.36032	3.11776	6.25306	22.0454	9.77188	3.24554	8.21706	4.58638	1.6827	3.28075	2.50492	1.40594	4.04353	2.62757	1.72756	7.50831	6.48004	3.63682	5.95136	5.55747	3.70245	3.51697	9.99805	2.80907	5.67427	6.1466	3.60455	5.08206	9.98088	0.487055
TCGA-5R-AA1D	5.24589	0.993539	5.14781	1.65299	3.50742	2.73975	5.23964	3.8544	7.60565	4.03712	6.60967	5.09418	4.82236	4.231	5.38175	3.79957	2.46908	4.39619	0.515534	1.81905	6.64593	8.07369	19.1556	8.48579	5.26688	7.10711	5.33484	4.09813	3.11068	2.54675	3.03824	3.60762	1.82899	2.75173	3.86269	2.26497	4.32492	6.70487	2.41995	5.65994	4.46362	3.29562	7.54314	5.64258	3.44972	6.3369	5.15293	4.77378	0.207266
TCGA-5R-AAAM	3.51245	3.55116	7.89217	5.3539	2.50431	3.00535	5.08462	4.85526	7.73059	4.40522	6.65782	4.18939	4.58237	3.2279	2.00116	7.33879	2.15835	6.69608	5.83349	2.32288	1.3267	6.39594	17.4943	10.0722	3.43564	5.87954	4.96206	1.81669	2.29893	2.24725	1.77661	3.08269	3.18083	2.28049	4.52606	4.74997	2.85249	7.22968	6.55245	5.79345	3.99337	5.48606	6.77238	4.48628	7.71838	4.38507	10.2787	5.08461	0.366258
TCGA-BC-4072	6.28517	2.84653	5.24277	2.60571	4.81819	3.53017	4.07602	4.58797	3.2685	3.3262	4.86176	3.32393	4.54421	5.40054	3.04654	1.50649	1.83126	2.87919	3.86482	0.930104	2.12507	7.4528	13.7679	12.176	3.64095	8.61615	5.80002	1.9454	3.39762	3.20371	1.34173	2.86195	2.57402	1.97392	3.53236	5.67888	2.56726	4.07858	11.401	2.7023	4.97843	5.69374	2.10416	5.93258	6.78297	5.72184	5.20973	7.32728	0.436864
TCGA-BC-4073	2.82905	5.92711	8.72806	2.22316	3.61556	4.74036	4.49966	5.49853	6.04297	2.09512	2.42043	6.66671	6.26699	1.03711	4.20252	2.70836	3.11077	5.2422	3.12819	3.5335	0.636479	4.79179	17.815	10.7823	2.62458	6.741	4.12032	1.34255	3.54957	2.52587	1.3196	4.0019	2.01844	1.59933	4.95069	2.45629	2.23657	4.90704	2.91319	2.47232	6.94235	4.42425	2.16572	6.06998	3.3704	3.41231	3.11609	2.50538	0.520721
TCGA-BC-A10Q	6.43153	6.10291	4.37412	4.59284	4.76903	5.85928	5.99641	6.31006	9.95457	5.3348	2.86646	3.42172	9.83364	2.49205	5.68301	6.6846	3.77815	5.23736	0.529117	1.87913	3.50028	3.78125	13.9202	4.55057	2.59302	8.99263	3.85177	1.98186	4.07551	4.05173	1.49589	3.07325	4.24626	1.57599	4.42647	4.07124	2.01662	3.93636	4.84709	2.53999	5.92489	3.77471	3.15841	2.23369	3.71899	4.04898	6.63543	5.8557	0.197639
TCGA-BC-A10R	3.05879	5.17591	5.05155	2.17627	2.05104	2.5214	4.60189	3.65514	7.36162	3.12348	5.34143	9.36732	6.89868	0.461456	4.28458	2.15533	1.33555	6.28101	1.70209	1.86138	2.35282	4.11658	14.0586	9.68043	3.58941	8.46422	4.84879	2.59079	4.3116	2.20269	1.84537	4.07714	1.64372	2.41921	4.90648	1.0333	3.01513	5.64778	1.85331	1.78114	4.0895	2.28911	4.6961	6.70354	3.88567	4.17635	5.70049	3.73241	0.531705
TCGA-BC-A10S	2.97989	5.60458	7.84317	4.96268	3.82827	5.81027	4.16105	2.68004	3.66733	2.59146	1.65037	2.57626	3.86106	4.66201	3.45297	5.12911	1.22323	3.11793	6.07238	1.63024	0.242394	2.81988	17.2457	9.28769	1.86384	10.7525	6.1979	1.54465	3.66085	3.98618	1.36412	3.40685	2.67202	1.72485	5.49448	4.46854	1.60227	3.13059	8.82433	1.6443	6.60673	3.53448	3.72701	6.93911	6.10556	1.93498	5.00855	8.76272	0.623929
TCGA-BC-A10T	6.6041	5.63437	5.80399	4.90314	5.792	2.33982	7.03246	2.2282	5.73142	5.76938	3.91789	5.3046	4.00023	4.39604	8.74	5.81705	4.19681	6.1011	3.95838	1.09252	0.507134	4.75032	17.1547	8.82828	3.05443	5.87073	5.28353	2.34214	3.37563	4.08697	2.34849	2.50988	3.58075	3.12991	4.58803	2.01872	3.74067	4.64081	1.71361	4.05605	6.84026	3.01724	3.22021	4.30893	1.93876	4.27	5.9178	1.11988	0.313879
TCGA-BC-A10U	6.08691	3.2085	10.937	9.02646	2.91296	7.55546	3.81472	4.4416	6.30849	7.53116	3.06569	2.78696	7.40131	1.46259	1.16185	3.03943	1.09547	4.38943	4.18997	1.96076	3.08737	4.58538	15.5501	8.2633	3.35284	8.72301	6.20718	3.00835	6.27932	4.71176	3.38247	6.63396	3.84544	4.0681	5.83158	2.42405	5.90288	4.43653	3.92657	4.62278	5.68668	1.80216	6.11364	5.2934	6.06072	3.04517	3.06463	4.54914	0.366888
TCGA-BC-A10W	7.16361	4.45119	5.4897	4.7248	2.59694	5.7544	5.77517	1.32743	3.54554	1.50068	1.77159	5.77333	2.94822	2.42725	4.55988	2.50941	4.64394	5.03986	3.30047	0.658613	5.4683	4.90788	12.4393	10.3979	4.60183	9.27613	5.32972	5.17961	7.68794	3.19225	5.10338	6.63507	2.12038	5.10983	9.3957	2.22261	7.40156	9.25088	4.18965	4.3797	7.00038	3.56356	6.829	4.92777	1.49888	7.65861	4.98384	4.32692	0.326068
TCGA-BC-A10X	7.04289	3.66029	6.01982	2.18044	2.62873	5.86234	5.89605	4.33829	5.9939	7.66604	4.61638	1.79568	2.9491	5.31848	2.40561	2.71333	1.70704	2.90746	6.30691	1.60801	1.19993	5.74897	18.6125	10.9755	3.86339	8.1282	5.44478	2.19111	3.78342	2.23115	1.50583	3.72994	1.01304	2.79434	7.97151	1.67435	3.12681	5.94483	2.63029	4.23658	5.86662	7.5507	3.23644	3.70535	6.9853	5.13029	4.77543	3.61872	0.471897
TCGA-BC-A10Y	1.72507	2.85087	5.16138	2.96867	3.34606	3.74142	5.54027	3.19003	4.04914	3.57061	3.65656	6.00819	2.69155	3.82394	4.59632	2.1918	2.0339	5.32214	5.75787	1.08493	8.94364	6.14097	20.4214	12.5452	2.69231	10.4611	5.44334	1.22156	4.13418	2.74093	0.909161	3.0341	4.03955	1.08836	7.24163	3.25873	1.05685	6.33728	3.15008	1.83216	5.45531	4.95168	2.42502	5.87554	1.87164	7.5372	2.90487	1.32158	0.563556
TCGA-BC-A10Z	2.89916	4.39373	2.48159	7.62696	2.83428	2.21034	5.08763	2.27642	2.73967	5.98102	2.50534	1.73279	2.5955	1.32884	2.57723	1.74513	2.16923	2.56054	4.31413	2.23775	4.25962	4.34421	18.2367	11.4271	2.78795	7.24664	6.26062	2.00252	3.47145	2.93985	2.53475	4.88544	1.09863	2.10592	6.15327	4.96766	2.53864	5.4574	2.63784	5.33386	8.12189	1.57029	5.88392	6.404	0.415389	8.73012	4.93262	6.7363	0.500488
TCGA-BC-A110	3.04589	3.54595	2.7611	2.3642	2.49166	1.96091	3.06421	1.53997	3.01002	3.8948	0.807244	3.64533	3.30772	0.687239	1.5825	5.35947	1.09808	5.39095	1.92267	2.19927	4.05701	4.25373	17.5813	10.9691	2.40757	6.90406	5.48936	1.55747	2.84575	2.60244	1.29197	2.85921	1.56839	1.36969	3.15974	2.4506	2.54255	4.70171	3.63181	2.61748	2.90407	4.05269	2.69071	2.79942	4.47466	6.04637	6.2222	7.85305	0.547244
TCGA-BC-A112	3.67964	4.15746	3.57885	2.28265	2.76857	4.35328	2.12665	1.92114	4.13667	3.06823	0.250727	7.85459	9.34612	2.79579	4.49303	4.88083	1.48332	2.80932	2.61137	1.26382	4.28348	6.65711	24.0927	9.49667	3.23229	8.67426	3.83587	1.82294	4.28514	2.04036	1.22357	5.40785	1.04152	0.790743	5.88785	1.32921	0.867779	4.40914	1.37171	2.45979	3.54091	2.55137	2.35554	5.04374	5.81502	4.38376	2.30677	6.07561	0.465742
TCGA-BC-A216	6.5431	2.46623	2.26364	5.35962	3.75595	6.50275	8.30972	7.48204	5.05282	6.713	10.6714	6.54188	4.3863	5.18901	5.62034	6.99184	3.28854	5.75056	2.22873	1.89511	2.01421	4.32881	19.0863	7.17862	2.35923	6.49008	4.79767	1.57708	2.61677	2.49579	1.2422	1.528	0.974315	1.04499	1.92948	1.18812	2.48536	2.30706	1.40832	4.40165	3.15489	2.54247	7.156	4.29158	2.54792	4.43388	3.42049	6.42992	0.498711
TCGA-BC-A217	7.99956	3.18906	1.17286	2.03439	2.12415	1.5813	3.86604	3.40902	2.56234	1.14999	0.990586	2.12953	0.108444	2.50245	3.23883	1.42349	2.023	1.82119	0	4.00138	0.174872	11.2112	7.2718	16.0998	6.01045	5.61137	10.1629	3.70439	2.03682	5.48599	6.24094	1.44098	5.07105	13.6153	3.30374	7.02285	8.68985	2.83876	4.75731	15.5802	2.4424	10.1097	7.8159	4.05493	6.22987	9.64805	2.51826	5.93542	0.234704
TCGA-BC-A3KF	3.93861	2.35508	4.24603	3.26164	3.55808	3.04247	4.42408	2.22344	2.36377	4.4761	3.75454	3.86376	8.60953	2.50437	10.5227	1.26431	3.13581	8.59732	2.77917	6.22154	3.87679	6.1935	17.9827	9.15549	3.22949	8.88939	5.08343	1.82422	3.10331	2.62532	2.14394	4.20461	2.1337	1.61231	4.08704	2.29824	3.58141	5.91368	1.90255	2.9006	5.35454	4.73883	4.0557	4.98315	5.55154	7.12979	7.45154	5.77339	0.309683
TCGA-BC-A3KG	5.49098	4.80684	6.78518	5.95014	3.88134	5.46875	8.27574	3.37358	1.64258	1.60385	1.42919	2.27679	5.69367	3.34098	5.08811	3.9891	0.960971	5.49867	1.84973	2.69566	3.77423	13.4181	18.3835	10.063	5.61222	13.0722	5.4794	2.44937	5.45569	2.89991	2.92839	5.5912	1.56042	4.31554	7.78006	2.99281	4.18387	6.56411	6.50954	7.82918	3.85945	8.75679	4.64077	3.70433	4.61922	2.63471	3.41841	12.0194	0.142494
TCGA-BC-A5W4	3.38789	2.47882	7.41747	6.01087	2.52103	4.69177	3.95937	0.937098	4.4785	3.05045	3.49125	3.801	5.53603	5.422	1.37462	6.24355	1.94553	0.317244	1.3978	3.96205	5.04008	7.66724	12.7706	15.1609	3.47972	10.1027	6.97553	1.33998	4.01188	3.11857	1.443	6.54842	4.6406	2.16826	3.96917	8.61616	1.6762	6.93165	4.60229	3.27575	5.84232	8.36494	1.71684	6.47652	3.42655	2.47636	3.25095	5.10404	0.503256
TCGA-BC-A69H	3.48372	1.5634	2.89597	6.52754	2.77957	3.16685	3.56814	2.21819	2.15014	3.20896	3.2086	4.13893	5.41325	5.27197	1.21517	2.56755	5.82138	1.92515	3.26328	0.749445	2.13936	9.87826	7.4148	12.3653	4.58709	4.69075	5.22477	2.24867	2.02564	2.94975	1.60876	1.80249	2.36642	3.71205	1.7928	3.24395	4.91005	1.77765	6.62525	6.42652	2.7273	6.17295	2.63473	4.16776	6.93008	8.93077	2.83415	5.3437	0.276825
TCGA-BC-A69I	1.19206	1.01489	2.64651	1.46799	1.02344	2.32449	0.77015	1.02691	2.69129	1.67258	0.718022	2.36629	1.96044	1.25826	1.58058	0.886023	0.730434	1.21315	1.86749	0.741904	1.06015	2.29778	0.796056	0.561898	1.15528	0.662728	0.868763	1.1419	0.795769	1.37639	1.40669	0.897221	2.07739	1.47515	1.03662	2.78121	1.70971	1.0549	3.22341	1.60734	1.06193	3.33166	1.63301	1.23032	2.92023	1.56482	1.01582	2.87087	0.455133
TCGA-BC-A8YO	5.48871	4.16972	1.98575	4.38809	2.6323	2.08833	4.13615	2.22765	2.28349	5.17082	1.81582	4.15745	1.74178	2.42132	2.4134	3.4681	4.19561	3.66947	5.71099	1.86416	0.287908	11.0981	10.8824	14.4759	5.01289	5.39367	6.21882	2.41541	2.4538	3.40791	3.57673	3.56118	3.11225	4.70606	2.6576	7.1481	6.02724	2.7992	7.40012	2.21302	4.40503	5.60927	7.76434	6.05337	4.44896	8.39477	4.18413	3.81319	0.132072
TCGA-BW-A5NO	6.36744	3.1401	7.35582	4.04754	4.17435	5.46242	3.57949	4.30445	3.83778	4.9511	1.55222	5.44807	5.10214	2.50287	10.9187	4.30344	1.33215	6.69586	4.75255	2.83687	7.01329	5.07242	17.4624	7.93067	2.86924	11.8825	4.37351	2.48633	5.89945	2.1245	3.03614	5.61097	1.76141	3.7302	5.29429	2.03668	4.98823	5.3597	2.21178	4.32055	7.94648	3.12452	3.99863	2.82399	2.00386	4.4055	4.76961	3.81679	0.362981
TCGA-BW-A5NP	5.61956	6.8523	4.09343	2.95226	5.69506	2.08929	4.16459	4.51908	3.08869	9.81027	5.09805	1.26191	3.97011	3.86649	3.56655	3.39666	5.09929	2.26941	2.76311	2.62567	1.48276	6.95303	5.97031	19.506	3.53807	4.79969	11.4059	1.91175	2.57599	5.48027	1.94314	2.13241	6.17501	4.81285	3.05385	10.1291	3.95629	5.06894	7.42786	4.49781	5.07135	3.04255	5.29511	4.88736	3.40803	3.55649	5.53882	3.64791	0.463223
TCGA-BW-A5NQ	8.5612	0.971852	2.43464	1.90695	2.9139	4.16094	3.06499	4.30247	3.18836	2.01833	1.94269	0.708128	3.48892	1.48561	2.87923	4.04946	1.41277	1.6409	2.58647	1.81125	1.19987	12.4973	14.4448	14.3649	6.09515	8.80906	7.41207	2.62944	4.61093	3.50876	3.01664	7.55588	3.95688	2.3709	6.61905	4.65454	3.27468	4.45442	3.66976	7.48217	5.9242	6.11419	3.81125	2.6602	4.85943	6.91457	1.5194	2.98487	0.23225
TCGA-CC-5258	4.9622	2.42991	4.25618	4.3781	2.58653	3.06884	3.91258	3.91628	1.26914	4.39624	1.05822	4.52969	5.18171	1.78307	6.4351	2.47536	1.73469	2.32023	1.92386	1.8223	5.14932	8.78665	12.445	17.2127	4.39681	6.44328	7.12918	2.20653	3.8294	3.10609	1.39497	4.65783	2.99964	4.62241	5.14898	3.0314	4.84305	4.21315	4.01233	5.43032	4.37967	5.58597	2.33659	4.12709	4.10584	7.84655	5.28956	6.58328	0.401704
TCGA-CC-5259	4.63912	4.0808	5.48608	6.29987	8.90016	2.47345	4.7691	3.32981	5.35288	3.82438	1.34083	4.79607	3.24795	2.93023	2.42993	4.57305	3.07191	1.89522	2.06946	2.47746	2.69069	12.1666	15.672	11.5985	6.105	8.47866	5.52077	3.15772	2.99521	2.34827	3.49923	5.16462	1.37979	6.19313	5.24256	1.37818	7.97077	8.07975	0.919738	4.79954	5.449	2.29406	7.37371	6.03284	4.52663	3.58565	4.66825	2.75562	0.178506
TCGA-CC-5260	2.79705	4.77465	5.52676	5.55893	2.71562	2.28055	5.16898	5.23501	7.49795	3.70899	2.82494	2.40394	2.63345	4.07909	3.91283	2.65387	2.86331	2.8885	3.48394	3.61306	1.22392	5.98747	6.76725	14.5291	3.94202	5.65967	8.39275	2.28279	2.83134	4.97482	2.65338	2.31684	2.72097	3.68766	2.5576	3.55314	4.93349	4.26324	4.14883	5.81356	4.71107	2.49396	6.47155	5.81863	4.80477	8.58885	8.62183	5.01556	0.40703
TCGA-CC-5261	2.84739	5.13762	5.68375	6.54979	5.07325	1.20898	5.37422	2.61121	2.48377	3.9101	3.30198	2.50225	2.59445	2.51739	3.8635	3.19849	2.91454	1.57271	2.43008	0.878594	1.96958	6.92627	13.4341	17.5461	3.77485	7.23951	7.85835	1.82131	3.56041	3.7977	2.6491	4.69544	1.85451	4.20628	5.75638	2.30112	5.60331	3.29141	2.91248	4.7605	3.89522	3.81882	3.88508	4.98043	8.26394	6.49002	4.56649	2.74769	0.428495
TCGA-CC-5262	1.65742	3.04657	6.67006	8.16583	5.93355	6.18844	8.17056	2.88327	4.34624	2.4633	2.92819	2.60631	3.56036	1.10083	4.55242	4.72084	3.97161	5.47857	0.909789	1.75864	1.02727	6.40291	17.7525	15.5271	3.75366	7.98177	5.97538	2.33029	3.72315	2.32749	2.14903	3.97064	1.5569	4.64752	6.54503	3.42772	6.59791	7.76491	1.19552	3.9072	8.39148	3.2342	7.15023	4.463	1.97528	6.17804	5.69633	3.47156	0.404495
TCGA-CC-5263	0.955089	2.41801	3.09126	1.94188	4.23718	5.32349	8.62241	7.41537	2.49496	7.9942	4.20874	4.84629	1.44393	2.08488	2.31899	3.00632	2.80815	3.36254	7.26371	1.93516	4.50649	5.55433	14.8289	16.9668	2.384	6.5498	6.8818	1.02863	3.02302	2.96018	1.18855	3.70343	2.20488	1.52642	5.04142	4.65595	1.96596	3.06493	5.3566	2.00334	4.44191	3.65474	6.08834	3.50267	3.91077	3.28806	5.91483	5.77443	0.595317
TCGA-CC-5264	3.34415	5.28029	1.20553	7.13572	4.67608	3.14323	2.37412	3.73179	0.980679	5.93614	1.16197	3.25934	3.54987	3.38436	3.9356	1.61258	0.93264	5.96768	2.8135	1.13575	5.27913	6.55806	19.6593	10.3411	3.56302	9.06096	5.24975	2.10432	3.72605	2.91711	2.59556	4.70699	2.18803	3.53209	5.73231	1.99098	5.32793	4.40936	2.81706	6.6374	4.19722	3.07798	6.0601	4.02207	2.37542	4.21714	2.9202	6.78185	0.370435
TCGA-CC-A123	9.50347	3.15799	4.83808	7.92293	2.27438	5.34327	2.34242	2.2575	6.53075	2.53358	3.99453	2.45324	4.26476	1.95988	8.26035	5.88464	1.56365	1.22997	1.9462	1.49419	3.82356	6.29881	14.9219	10.6771	4.59802	11.8346	5.45446	4.73407	10.8141	3.59363	6.47209	8.45831	3.43815	7.95591	9.79637	3.56837	5.85588	7.54446	3.41827	7.97036	4.58073	3.30522	7.12665	3.94852	1.70981	5.11597	2.6469	2.83836	0.213042
TCGA-CC-A1HT	1.97913	1.86912	3.87874	1.75206	1.94732	2.03204	1.55203	2.01094	2.23546	2.49397	2.09402	2.34411	1.82201	1.29917	3.20255	0.446292	2.3725	2.72772	1.64138	0.984266	1.47573	11.7549	9.22977	8.0636	5.92102	3.90367	4.12654	2.95993	1.80832	2.24848	4.59041	2.82249	3.60874	4.63292	2.82595	3.17497	2.91622	2.98685	2.55881	1.22649	1.52835	2.95704	1.54663	2.32547	2.15455	3.39332	0.725279	2.12189	0.162954
TCGA-CC-A3M9	5.44775	5.32382	6.00974	3.81161	3.89706	1.81705	4.08628	2.00551	0.807808	3.02673	3.474	1.56594	6.61088	1.9635	0.542346	2.16784	2.85733	4.6177	1.47423	2.16234	1.09232	9.21099	17.681	14.301	4.82574	9.74587	7.24597	2.55638	3.36025	2.41306	3.47393	5.03665	3.8037	4.31719	5.5891	3.08014	10.5641	6.39944	4.84591	4.31363	4.63974	4.79713	9.3233	3.24487	2.80452	3.03975	4.9643	4.06323	0.359507
TCGA-CC-A3MA	6.25511	2.87162	3.38335	9.26491	5.71813	3.21711	4.58733	4.00267	3.45383	6.54562	3.32416	2.98597	3.87417	3.25891	3.38122	1.65191	3.31038	1.78845	1.68922	1.50134	3.17446	8.99348	11.8357	20.9204	4.88456	6.42911	8.22138	2.46661	2.79414	3.81397	3.29142	4.00273	4.37695	4.47267	6.20721	10.2221	4.21755	7.54341	3.50894	4.94223	4.18027	6.072	8.5885	8.46498	5.13787	6.87094	4.74206	3.28577	0.462322
TCGA-CC-A3MB	4.7483	2.09164	2.67295	3.51459	5.95378	3.04857	6.57554	1.59456	1.58818	5.24939	2.29627	3.31628	4.1432	3.35768	3.12672	3.61345	2.26004	2.4086	3.15	0.140406	0.797988	8.08824	17.7822	16.3661	4.41716	10.2903	7.30789	3.13487	5.58374	3.37875	3.65532	8.24107	2.58779	7.96564	8.79145	3.81182	9.35799	6.54845	5.7156	7.88396	4.30499	2.47183	8.20652	3.39547	5.85161	6.51254	7.05273	7.67199	0.373029
TCGA-CC-A3MC	5.72295	5.13034	2.16226	4.63656	3.86398	3.6145	5.74477	2.02772	2.64496	4.74478	6.12079	4.80824	4.2367	2.48731	4.83955	2.61268	1.58767	3.16666	1.09774	1.34533	2.64577	6.95371	15.0758	15.7336	3.93163	8.28848	6.7074	2.68911	2.96004	3.0964	4.02622	3.66913	2.38202	5.72844	4.57621	1.27636	7.94442	9.35817	4.922	8.38368	7.47861	4.83827	8.09236	6.17638	1.58549	8.48962	5.5906	4.27761	0.389685
TCGA-CC-A5UC	6.73234	5.2776	3.69114	4.6863	3.21555	3.34072	2.79144	4.22814	2.57233	8.35769	4.81735	3.69541	3.31058	5.10879	1.20166	7.97098	6.32283	3.61479	5.22397	2.4268	5.3949	6.91979	11.6529	17.3795	3.385	6.65194	7.56126	1.85725	2.94043	3.62871	1.59739	4.61382	2.59578	3.57051	4.82105	2.56709	2.95997	7.06577	4.61718	5.60422	3.13773	4.32804	1.84283	4.98457	4.67909	5.28035	4.06758	5.08216	0.476642
TCGA-CC-A5UD	5.43775	3.62219	4.8249	7.42381	3.42618	1.29073	3.87861	4.1462	1.94623	4.19794	4.57056	4.39894	3.54398	2.27808	3.83016	3.05031	1.57998	2.57364	5.20015	3.49605	2.76662	7.03842	9.97836	17.284	4.7224	7.23826	8.84637	3.02978	3.58335	3.87662	2.29283	3.38864	2.34302	5.85519	9.21069	7.22637	7.42341	6.06958	6.42002	7.80063	7.84375	5.3202	5.39651	4.97327	4.54167	4.36305	10.2806	2.39781	0.425193
TCGA-CC-A5UE	6.23556	6.62866	0.4699	2.94149	5.68284	4.08025	2.5472	2.99378	0.858584	6.36315	3.37742	1.30529	1.2057	3.66306	2.33119	1.50731	1.11208	3.91592	2.12642	2.58893	2.11141	14.024	15.3151	13.3054	7.78611	9.19027	9.0954	4.33342	4.21008	4.94333	3.0883	3.55602	2.23638	4.59643	3.61876	3.40207	5.29714	3.67945	1.8125	2.73928	5.3606	5.91742	6.93678	4.13227	2.42961	10.1384	6.09828	1.68028	0.159587
TCGA-CC-A7IE	3.83516	3.31661	3.20306	8.43567	4.52588	7.14285	4.4745	5.56651	3.26453	2.22351	1.37926	3.27757	3.67998	2.68669	9.80781	3.58865	3.46594	4.09499	1.93563	0.859753	3.46628	10.3378	19.8663	12.0354	5.1388	8.04845	5.29698	2.98588	3.39461	2.51677	2.74021	4.41354	2.14636	5.4157	6.19604	1.51488	6.87873	5.72257	6.48975	4.64819	4.69652	2.6261	6.80681	4.40966	6.13485	5.96939	3.26369	1.12571	0.326359
TCGA-CC-A7IF	4.67911	3.84959	2.08112	5.15238	2.9547	2.44807	4.98929	2.68623	3.28247	1.63784	2.74732	2.88362	3.01143	1.84375	2.84242	2.73391	2.24803	0.0524921	5.37728	2.15036	3.5706	7.49023	15.4186	16.8303	3.96333	7.75621	7.0852	2.10656	2.65079	2.64812	3.1409	2.50356	3.04455	4.58244	3.74604	4.84809	6.06288	5.93332	5.91855	6.17413	3.80687	9.26448	2.27459	6.07081	7.20294	4.13994	2.93026	4.56038	0.43669
TCGA-CC-A7IG	4.77307	3.20998	5.55461	3.64285	4.78211	4.83937	5.20415	2.02188	2.03607	2.22822	5.51483	5.2411	3.04675	2.74666	5.78996	4.84596	1.11818	4.6864	1.36912	2.25493	4.64982	12.2576	14.0248	12.9182	6.05568	7.88022	6.09978	2.875	3.81715	2.48672	2.50905	5.3769	2.04057	3.60668	5.71444	3.17437	11.8153	10.929	5.77741	6.21195	4.38106	3.02605	9.39019	4.83863	2.3586	9.87292	6.39321	6.49244	0.209114
TCGA-CC-A7IH	3.73478	4.71833	10.3135	4.22555	1.09982	5.67556	2.87723	2.19783	1.74849	1.87258	4.52625	2.38875	5.8614	0.792735	1.51761	1.00737	3.67876	2.58273	2.90151	3.63673	1.6736	8.23625	16.1174	18.8959	4.00068	7.06569	8.1136	2.46064	2.83871	3.19531	3.2013	3.93491	2.53399	4.18116	5.26784	4.16413	10.4241	5.68798	7.45094	6.42727	5.50036	5.49442	5.21552	4.60305	7.87337	9.87727	5.0057	2.70717	0.448645
TCGA-CC-A7II	9.27431	5.73676	8.13468	2.83972	2.75105	2.18899	6.3448	2.67184	1.58967	2.55084	8.72234	2.085	4.14589	6.06502	3.98194	3.72453	2.10062	4.50854	1.50123	1.22777	5.2091	9.01907	13.5083	13.7213	5.30029	6.82656	6.70291	3.30711	3.06866	3.34589	4.12197	3.48589	2.11584	7.90589	4.71375	2.05365	8.18191	3.32652	2.31327	7.81778	7.61306	1.92197	4.8949	3.82984	1.05533	5.49831	4.37212	4.33695	0.255129
TCGA-CC-A7IJ	3.21283	5.72097	5.40969	5.16621	2.74366	2.32189	4.55592	6.76012	2.46683	4.39601	1.57679	4.58565	1.20848	4.5444	2.72373	3.05451	1.10929	1.38666	4.26475	2.86046	3.74772	7.67386	11.587	16.969	3.8717	5.79438	6.81709	1.55755	2.52615	2.7011	3.7229	2.27624	2.5186	2.20841	4.2603	4.07752	8.35818	3.60836	3.53249	4.3014	5.8798	4.87265	7.54018	3.17312	5.8653	4.72215	5.65434	9.67227	0.41815
TCGA-CC-A7IK	3.97539	2.96586	5.59386	3.6136	4.94648	2.05511	3.09138	5.72363	4.13352	3.33622	7.18937	3.35411	4.8687	3.11181	5.12575	5.8621	9.79846	0.266774	1.3995	2.31982	1.35204	6.04982	7.19881	21.0371	2.78092	4.57926	7.22936	1.38897	2.06059	2.99283	1.4538	2.41371	2.39203	3.55476	2.13725	3.59222	5.90103	2.99214	8.25355	7.03353	3.61965	4.43189	12.4313	4.01226	3.5985	5.92906	6.50058	5.55184	0.555508
TCGA-CC-A7IL	1.99273	2.37874	4.76018	1.27345	4.18211	3.13257	1.25184	1.8912	2.84486	1.23665	1.78638	2.92887	1.12653	3.40554	1.07421	2.77245	3.73141	3.13764	5.43991	3.48232	2.6213	5.72924	13.242	12.9665	2.57283	4.81117	5.06992	1.40846	2.22918	2.44132	1.43083	2.21611	2.21969	2.07415	1.78131	1.92594	1.58248	3.0051	3.81673	2.73401	1.83616	4.89712	2.09644	1.01976	3.13603	0.290254	2.45975	2.71155	0.476328
TCGA-CC-A8HS	4.33585	4.42401	3.72056	3.70023	3.51072	1.9251	3.20945	1.25064	1.28436	1.27963	1.54976	5.67929	1.6512	2.12684	0.899091	1.09286	1.03909	2.86395	0.771884	1.35443	0.65532	13.8816	18.2544	19.0635	7.24206	9.57292	9.19512	2.95793	5.18684	3.53326	8.0394	9.1205	3.55724	13.4692	9.50727	4.77731	13.1652	11.7428	4.95106	5.30033	7.35263	4.67668	8.93661	3.34057	5.98531	4.26514	1.37686	3.54118	0.23921
TCGA-CC-A8HT	4.16762	3.8158	1.87648	4.85592	1.96451	1.9592	3.19487	4.3125	3.7668	3.65834	2.54117	5.35033	7.28902	1.16279	1.24912	3.10444	4.93872	4.02991	2.57911	2.39022	3.06023	11.1182	20.7078	12.1712	5.46188	7.63607	5.3458	2.77884	3.53115	1.96706	2.45964	5.06322	1.08705	6.79767	5.02434	1.23272	8.31492	5.05727	1.46543	9.11506	4.09718	2.33241	6.31985	4.35439	3.95236	5.7425	4.00267	2.06849	0.250108
TCGA-CC-A8HU	7.61322	3.32635	7.33265	6.18116	4.73888	4.2326	4.35885	3.38113	3.82893	2.92098	0.875388	3.11755	2.75597	1.82805	3.03904	2.21439	1.69218	0.479921	1.25598	1.59171	4.03054	8.86758	15.896	18.5423	4.79098	8.64241	7.77643	2.90533	3.20528	2.98774	2.76415	5.14405	2.63266	10.6224	7.51033	2.69487	12.6044	11.3549	5.25303	7.85983	2.95205	4.57309	8.41881	7.28219	5.99556	1.87937	6.79693	4.33326	0.401138
TCGA-CC-A8HV	8.63126	3.87386	6.34914	6.41262	2.43716	5.25543	1.72877	5.87653	3.87381	2.08076	3.70327	2.50441	5.71542	5.81457	2.84196	1.78406	3.71669	4.15754	2.76979	5.95821	4.45362	11.8249	11.996	16.1984	5.17153	5.59822	7.45242	2.46656	2.33532	3.08442	4.47754	3.89966	1.97386	9.60575	5.05074	1.45527	5.1028	8.34711	1.99447	5.00278	4.2206	2.89226	10.7657	7.18225	4.15096	4.33869	2.6217	4.07257	0.233591
TCGA-CC-A9FS	5.39289	2.23925	3.01584	2.79934	3.87401	0.694345	9.01076	4.57489	1.94421	0.923417	1.14628	1.44046	5.21276	2.254	1.94218	1.56101	2.11803	3.20677	1.24511	1.14726	2.50601	8.65416	15.2028	20.4825	4.93724	8.32196	8.35987	2.81902	3.54352	3.14107	5.41321	9.53771	5.53203	7.91169	8.91041	8.01757	9.23751	8.33642	6.88167	8.23843	4.03777	6.43582	11.0465	9.36222	4.75364	4.13655	5.54169	3.93837	0.375259
TCGA-CC-A9FU	5.31884	1.61849	1.55095	3.50526	5.96804	0.436585	5.68009	1.55106	0.668391	1.56311	2.31288	4.33862	2.65511	0.989489	1.08118	1.66466	1.02723	2.41473	1.40659	1.38458	3.76693	8.5811	14.308	11.0405	4.94998	10.1054	5.39471	3.56654	6.70739	3.09977	6.62835	9.17191	1.98794	7.04662	8.89157	1.71064	11.423	6.69538	1.56293	4.51918	4.2142	1.12496	6.45378	4.05425	0.841974	10.2679	2.28677	0.7094	0.205277
TCGA-CC-A9FV	5.12141	1.93006	3.5236	1.91233	3.60325	5.35666	1.76156	1.15525	2.45191	4.28803	4.30888	3.21555	5.0928	2.42875	5.72668	0.77497	2.86905	3.1394	1.64774	1.8856	3.61585	16.2126	18.1102	8.44185	9.35888	8.62771	5.27461	4.19437	3.28329	2.85189	3.49228	2.68768	2.04039	6.22605	5.23631	3.45167	8.92888	3.84601	5.51878	4.97079	2.28148	7.89826	3.45742	3.18523	4.24636	3.0766	2.84812	8.17571	0.151991
TCGA-CC-A9FW	4.17381	5.77735	2.08163	4.40112	6.50261	1.49484	5.23044	4.99882	2.19145	4.38633	3.16904	2.54624	5.6007	5.44496	1.6218	1.40713	3.41215	3.52472	3.88554	3.19271	1.67031	7.954	8.77227	14.8191	3.53494	4.15863	5.95466	1.74061	2.18127	2.91975	1.83535	1.40749	2.47385	2.15776	1.60173	2.10102	1.58914	1.15264	2.78322	1.87302	2.81081	1.90924	1.8592	3.06321	1.82484	3.88341	4.0738	2.37387	0.392758
TCGA-DD-A113	3.96464	5.4867	4.14692	4.5771	3.41568	5.17469	4.31982	3.45327	1.21628	2.28421	2.8094	4.9968	4.35906	1.95956	2.17074	2.49006	3.05116	1.28218	2.50763	1.32386	2.60801	10.7765	11.2877	16.8357	4.89246	7.29347	7.92682	2.34188	3.43572	3.42129	5.02913	6.3587	4.40783	6.27584	7.79233	5.10853	6.53486	7.93701	6.35981	5.28338	7.41442	5.23632	6.62246	5.07984	4.02093	9.0379	4.5581	5.45341	0.308075
TCGA-DD-A114	4.90644	4.0426	4.73789	7.32587	1.83064	3.77853	4.31697	1.87151	2.56357	4.52795	4.05521	3.17773	4.87279	1.93974	0.82188	5.36084	2.73912	4.38432	3.14236	1.39239	1.41014	9.36452	17.5831	11.4148	3.37655	8.61288	5.66222	1.72842	4.22944	2.70474	2.38845	4.8329	4.55201	2.99386	5.46537	5.87872	4.66546	4.48007	5.93095	3.75867	4.39567	8.82486	4.35966	3.75434	1.17358	8.39572	4.39027	4.85062	0.378098
TCGA-DD-A115	3.76466	2.52096	7.43792	7.77636	1.13398	4.1069	5.96759	1.96853	3.80409	3.01194	3.3111	3.28136	4.33365	2.78452	1.27777	2.75063	0.955154	2.74676	3.90391	1.09716	2.20878	6.66763	28.7372	11.9139	3.85746	11.8957	4.94575	2.19386	4.11544	1.93551	2.22143	7.63172	2.80463	4.70911	7.38911	4.7546	4.75398	6.66208	4.75425	9.14191	5.52426	6.77602	9.06536	2.49439	5.72398	7.65042	3.68675	5.30696	0.398108
TCGA-DD-A116	8.40195	4.2905	9.37374	4.21012	2.34488	6.99467	2.78043	2.20079	3.16718	4.12	3.04344	4.94099	4.11103	2.15427	3.52792	2.21596	0.931164	6.16287	2.94721	0.920623	2.02793	11.9813	29.2963	9.93501	5.58487	11.9014	4.48089	2.47895	4.97804	1.71765	2.55317	8.45076	1.62286	6.24102	5.06106	2.68394	6.97275	8.04678	3.37182	4.93618	5.13201	7.71801	3.99719	2.31482	3.28034	7.03741	2.60372	6.27349	0.222541
TCGA-DD-A118	3.4255	4.55521	5.05176	4.71115	2.02503	7.89806	3.82276	2.01906	5.45639	4.07234	3.34804	1.39708	5.10175	1.92138	5.4341	5.89651	2.10824	3.7257	3.15007	1.32806	2.59906	6.26015	28.5548	7.23906	3.36294	10.1934	3.76422	1.98923	4.65247	2.12473	1.75621	4.93034	1.43983	2.62327	5.51078	3.61903	3.86248	5.70209	4.76979	4.62101	4.82497	6.6724	5.32654	5.00201	3.16708	4.30677	2.28425	10.4618	0.406371
TCGA-DD-A119	2.64508	2.89483	5.27651	4.72549	1.50621	3.77587	7.45635	2.05695	3.80987	2.47481	3.97156	3.14962	3.11291	1.30105	1.1158	3.39296	3.16688	4.85294	3.2465	1.92045	2.51059	6.42942	21.4165	10.9842	2.89894	9.0822	4.62575	1.24248	3.73358	2.64376	1.07008	5.87956	2.73239	1.30932	3.80234	3.61604	2.72493	3.11657	5.93351	2.65688	4.3439	5.94143	2.47808	1.89324	5.45225	3.18487	4.75991	7.2765	0.454802
TCGA-DD-A11A	3.63619	5.46914	2.87707	4.19822	3.37906	2.37884	1.54301	1.31231	1.39544	1.83257	5.74082	3.80333	3.95682	2.65213	3.10292	1.69713	2.7458	5.82485	3.72952	3.35742	2.42932	3.58129	15.7507	8.20679	2.05544	9.81543	3.62194	1.35283	4.17537	1.86574	1.34435	2.88384	1.09548	1.75612	2.84491	1.64189	3.19335	4.91279	3.20651	2.57211	7.59164	5.11374	3.55153	4.32652	3.71717	3.82374	4.54275	7.67977	0.563466
TCGA-DD-A11B	0.683036	5.05512	2.48994	1.77496	4.24088	2.42238	3.02128	2.02985	1.24333	2.45165	2.26399	5.35588	2.60042	2.86562	2.75231	3.53976	1.96285	1.90059	3.56442	1.98345	2.21394	6.57969	20.3522	7.83091	2.6989	6.33743	3.29815	1.39533	2.99791	1.05135	1.39015	3.5989	1.02741	1.06201	6.63097	6.18658	2.14238	5.03475	5.35635	3.09637	6.01114	5.15324	2.25873	3.04576	5.48234	3.41805	4.52242	4.57065	0.514998
TCGA-DD-A11C	6.49107	3.15332	5.41354	6.06506	4.79811	3.90639	5.21528	5.16798	7.71947	2.90278	1.5603	3.86633	4.99377	1.10603	0.287735	3.72411	3.10215	2.8896	2.255	1.05923	1.66745	6.16203	18.8964	8.10672	2.90905	8.68498	4.37031	1.57803	4.03383	2.18792	1.3587	3.55089	1.63012	1.57369	3.4814	4.30515	5.00293	4.91626	4.85301	3.00134	6.22597	7.91416	3.24711	8.17452	3.79221	5.41079	6.65022	9.35765	0.363124
TCGA-DD-A11D	3.48342	3.60851	4.79164	5.0054	3.05816	3.92498	6.84846	3.01552	4.07814	4.14381	3.13862	3.97849	5.26401	0.806023	4.33582	4.97238	1.52755	2.6663	2.11695	1.92966	0.88389	9.10374	22.5903	11.2405	3.84862	9.34414	4.57736	1.74058	4.86203	2.02423	1.53888	5.57484	2.01369	3.4747	5.03624	3.26051	5.25282	6.04415	5.45083	4.85069	4.36294	5.26572	4.89438	4.24069	7.02395	4.24317	3.30283	8.00173	0.314541
TCGA-DD-A1E9	4.80451	3.45924	7.74936	3.26006	1.66366	4.49084	8.13221	1.93556	5.92431	4.44467	3.87282	4.98123	1.92247	1.26288	3.05475	0.879276	1.52423	6.4511	3.30787	1.35597	5.29684	7.70499	33.3078	7.00507	3.57694	9.98251	2.81437	2.11058	4.99484	1.57054	2.56763	4.49682	1.28505	5.39834	8.38843	0.855303	3.53973	4.02403	2.29048	5.02181	4.2773	2.4719	7.53994	4.14	3.58104	5.12428	2.242	9.28887	0.320244
TCGA-DD-A1EA	3.49354	1.87201	1.20782	1.86715	2.19697	2.01068	5.61154	1.592	5.90151	10.0653	1.09912	0.753305	3.29548	1.53389	6.50222	2.20431	1.81809	1.36249	6.97615	1.76044	1.13867	6.31941	26.1708	7.26714	3.93412	10.8537	3.7634	2.15074	5.02079	2.13631	2.72295	6.04152	1.8128	3.76853	6.58781	2.66593	3.69992	8.07518	2.63214	6.47426	3.82588	2.60028	6.68139	5.61213	4.58712	5.71967	2.27174	5.88653	0.261834
TCGA-DD-A1EB	6.24196	1.42609	1.77596	7.50356	1.7078	5.46328	4.1908	3.10792	9.00651	3.50325	3.32657	3.34841	3.4213	2.07914	4.44957	2.02893	3.3488	4.82436	0.546788	2.84576	4.37574	5.66282	22.7319	4.9003	4.28785	8.15011	3.51271	3.88384	4.20298	2.10129	3.30706	4.78841	1.27523	3.37411	4.6792	1.67504	6.93481	4.32819	1.00221	5.98986	4.07723	2.24441	6.90288	2.99055	3.35895	3.02192	1.84578	2.71995	0.170878
TCGA-DD-A1EC	1.59377	6.52048	3.07276	4.61286	3.21454	4.92249	2.7332	0.788513	2.43851	2.31549	2.7922	5.52301	2.02062	4.88285	2.49742	4.80361	0.743914	2.40648	7.74537	3.58458	1.81546	6.72851	15.6102	10.6898	2.99022	8.85703	5.24068	1.27569	3.15022	3.0864	1.23137	1.51931	2.88581	0.989515	2.44297	5.54033	1.73199	3.06779	8.00087	1.40853	2.18552	8.36016	2.09972	3.7727	7.36589	2.8636	1.95254	5.36418	0.603805
TCGA-DD-A1ED	7.0515	2.49006	2.16999	5.2591	4.68122	6.84675	4.05268	2.94436	3.24027	6.1453	4.01621	6.09567	4.26035	2.36665	3.57914	3.77031	1.11683	3.0824	6.15165	1.82546	1.12268	6.35169	18.7373	10.5725	2.61975	8.16652	4.01086	1.29416	3.99339	1.39135	0.968723	5.74765	1.53753	1.39826	6.74324	1.46825	1.81064	5.45168	1.34311	1.98345	5.3579	4.71311	0.636439	5.37056	3.70774	2.34189	4.82997	1.99178	0.464017
TCGA-DD-A1EE	1.92866	7.20585	2.99375	4.31046	3.31554	3.30941	4.03737	8.33247	2.34298	5.94735	3.73352	1.54994	2.36481	2.78788	3.09294	1.66177	2.12077	2.70226	5.79764	4.06099	7.10488	4.92221	11.2109	11.2165	2.39032	6.46594	4.02334	1.30319	3.38221	1.82858	0.88162	3.28737	1.41708	1.19972	3.56536	4.12711	1.87236	4.8055	2.10775	2.87816	3.23079	1.75027	4.01168	4.71922	5.37099	2.94275	3.40535	4.96247	0.468407
TCGA-DD-A1EF	3.15175	4.03106	6.17427	6.77265	2.30822	3.09522	5.92962	5.03377	3.75469	3.54279	2.90103	1.58466	1.20311	2.166	4.1725	3.92431	1.55838	2.93574	2.17304	1.66303	1.93967	11.8906	19.6726	13.27	4.85528	8.78671	6.752	3.05206	5.37005	4.17171	4.53522	8.60109	2.65595	3.68998	5.8909	1.81215	6.92415	5.7192	6.55992	7.03322	7.00634	9.22963	7.58946	3.7479	5.53547	10.8725	3.64542	5.24835	0.240299
TCGA-DD-A1EG	6.9768	1.23961	3.1335	5.09486	4.31475	2.21727	6.52874	4.32171	5.00585	1.64121	2.20849	4.34856	2.32874	1.068	2.03199	3.71659	1.62255	4.0297	4.42315	1.84819	1.71965	10.7143	27.0195	11.266	4.42117	10.6313	4.97426	2.00506	4.78003	2.33407	3.91154	4.52976	4.5995	2.48542	7.03471	5.47177	6.98249	6.95095	10.5921	4.98633	4.51303	5.48462	10.177	4.44476	8.64196	4.62617	5.05756	7.8882	0.294366
TCGA-DD-A1EH	2.48343	3.81945	1.03342	5.90127	5.29658	2.95369	5.52259	4.31782	3.23831	5.25371	3.45655	4.27693	4.96579	3.73566	1.88361	1.01056	0.745888	11.2289	3.45098	2.11767	5.74334	10.9976	15.682	9.91083	4.51196	7.03396	4.48816	2.63499	3.50626	2.20441	2.95483	4.62548	1.68818	3.72308	3.93363	2.22218	4.25697	3.25468	2.77509	2.47873	3.53574	2.5566	4.15136	3.75376	2.47672	5.70267	3.35608	2.10581	0.223887
TCGA-DD-A1EI	6.67154	3.85907	3.41611	5.7882	6.74433	5.65515	2.94464	6.39305	6.2428	4.11776	1.80494	7.0996	2.47177	1.2214	6.73175	1.70319	1.52609	0.246102	2.67195	2.28493	1.96483	7.66826	13.3953	11.4222	4.71921	8.29057	6.596	2.89337	4.62776	3.23354	3.03623	4.23947	6.72371	5.11295	5.70232	5.33605	4.76183	5.74579	3.74849	3.95026	8.54497	5.1666	8.14634	5.94105	6.01208	5.09541	5.08372	6.06588	0.345147
TCGA-DD-A1EJ	5.43958	0.817189	4.55728	4.53281	4.41398	6.20042	4.63869	4.40105	4.69188	6.39521	3.75463	0.749025	3.45004	1.75257	4.43286	2.98038	5.51647	3.03123	5.30758	1.00336	0.803517	8.33129	15.4753	10.0618	4.60416	7.52774	3.74884	3.02397	3.50977	1.73123	2.61836	4.12425	0.875541	4.04412	7.58083	1.52219	6.2869	6.22141	2.05155	5.66841	7.57155	3.24271	9.56302	6.80142	2.65267	3.35805	7.04369	3.35171	0.224987
TCGA-DD-A1EK	4.50702	5.01455	4.13373	6.91671	4.83239	10.827	7.01064	2.76342	3.49571	1.68311	0.722299	2.53128	3.89949	1.81288	6.36659	6.63711	1.59001	3.1962	3.535	4.98532	2.25336	7.88582	24.573	9.11155	3.5849	8.21898	3.84421	1.72738	3.11519	1.44504	1.99369	3.9961	1.30619	3.73542	6.27121	2.43795	8.03167	5.14815	3.05456	4.27346	4.8339	2.78579	4.71222	5.50841	3.49362	5.26907	6.09611	3.15966	0.302296
TCGA-DD-A1EL	6.64852	1.17835	6.81027	5.87518	2.64644	5.64201	6.48397	1.81619	4.90926	3.99724	2.50993	1.20887	5.91979	1.99107	2.63487	3.27124	4.94757	2.48341	1.16603	3.04852	2.62934	8.7697	26.0011	8.91548	3.81856	10.0524	4.01259	1.63403	3.72064	1.66057	1.93498	3.43516	2.05273	2.24219	4.6891	5.75086	2.31723	2.89327	6.49201	4.72701	5.7853	7.61182	2.57836	2.54583	10.3338	2.93402	5.95563	5.05906	0.386425
TCGA-DD-A39V	3.14423	1.92657	5.34818	3.4967	4.42595	4.97427	6.35594	1.39899	7.08337	2.5292	1.23325	1.79564	3.6194	2.55696	4.55533	2.29265	1.10738	0.538365	4.61396	0.909376	8.57917	8.70041	25.5724	10.4306	4.50976	9.93951	5.25014	2.45741	4.40884	2.50253	2.51006	4.0348	1.73257	4.463	4.84514	3.09666	6.09492	3.78072	3.9487	5.21878	2.24112	4.44193	5.85187	8.76662	4.69035	6.59877	2.00313	5.78582	0.305807
TCGA-DD-A39W	5.55521	2.40537	3.85244	10.4871	2.48281	7.31103	4.70228	3.00563	2.81859	3.4426	4.61387	3.81951	4.10436	0.912088	8.55046	2.6465	0.450089	4.59862	2.80814	2.0438	0.727019	7.35245	24.1345	6.72723	4.9529	11.8104	3.66875	3.64021	6.31873	2.27358	4.82243	5.26138	1.37084	3.99747	6.37126	2.00403	6.18963	4.98333	2.44997	4.1461	5.05682	1.81644	3.6997	4.72438	1.65197	4.99053	2.41644	2.34486	0.21178
TCGA-DD-A39X	5.51783	3.66358	3.99707	3.16647	2.79887	5.37767	5.65624	2.10424	4.56823	3.51011	2.48094	5.21129	4.8782	2.0277	3.38692	2.25641	1.70008	3.39881	5.523	1.79405	3.06663	6.25324	24.0352	7.81329	3.52178	10.2244	3.40587	2.1397	4.43217	1.74087	1.90511	5.01706	1.35436	2.54177	4.29495	1.14493	3.24714	5.62931	2.45777	2.58739	4.15576	3.81073	4.63962	5.51521	8.19008	4.18901	4.78819	2.12439	0.427892
TCGA-DD-A39Y	2.97583	0.886065	1.52683	2.06345	3.50181	3.6467	4.15922	2.2747	3.75146	2.66419	1.67701	9.19806	5.24449	1.24414	13.0447	3.76542	2.48721	8.91643	3.71736	1.82202	7.09109	8.1455	25.9727	5.30374	5.31352	10.6616	2.24043	3.907	6.43211	1.18819	4.182	7.79278	0.988605	4.60166	3.6924	1.37719	5.18343	6.10254	0.88053	5.00369	2.94225	1.24416	4.05624	5.5372	1.84502	5.35558	3.6184	0.557227	0.120134
TCGA-DD-A39Z	7.286	4.28075	8.30093	3.54286	1.83005	3.93925	1.97439	5.54384	3.3381	2.92019	3.14646	8.17978	2.97212	1.90953	1.6708	3.13245	1.19519	4.70924	2.23342	1.49559	1.52542	8.44064	13.7979	12.0605	5.24697	9.09463	6.90752	3.33074	5.47883	4.04922	4.8819	6.05757	2.74705	6.2457	9.84903	1.84033	6.94922	6.7437	3.41687	3.68998	5.89253	8.48029	9.82782	6.29013	6.7789	7.40313	5.08308	8.2784	0.259166
TCGA-DD-A3A0	6.05977	3.703	5.94289	1.4905	3.6173	2.77902	2.67809	2.9109	1.45485	3.72743	1.3981	1.18575	4.15155	3.04793	2.19052	3.59106	0.921534	2.25411	2.28536	1.08599	5.94027	6.16128	27.336	8.66433	3.2779	10.8491	3.86684	1.80422	5.68467	1.74904	1.96394	4.64189	1.15796	2.6506	4.29432	2.26125	3.46676	6.41251	1.60471	2.86898	4.60641	3.14227	3.8625	4.30255	7.02895	3.70521	3.21412	5.15075	0.358817
TCGA-DD-A3A1	7.29084	2.7772	6.99019	3.706	4.41415	4.35317	4.1181	5.11027	3.77373	4.80186	2.97497	2.71086	1.15395	1.07044	3.65767	5.32277	2.00896	6.77469	3.76325	0.465726	2.7259	9.80183	28.6978	13.0763	5.47194	11.5006	5.69889	2.49023	6.87771	2.3226	3.99327	6.79996	4.82828	5.23443	5.86906	7.61275	7.7502	4.23923	4.71576	9.45733	4.6211	2.889	6.92736	2.22141	7.51373	4.98379	6.59122	1.82902	0.322765
TCGA-DD-A3A2	7.30173	1.60332	2.92845	7.36457	3.85285	5.99598	6.86981	2.5121	1.60865	5.94343	1.29135	9.76253	3.07124	0.77927	2.80769	4.09865	1.73745	1.12824	1.60163	1.52518	1.03464	5.43533	30.5535	10.8987	3.35214	10.2135	5.37234	2.15084	4.84014	2.62155	1.71086	6.36019	2.8497	2.6949	7.74056	3.02153	1.96249	4.88444	6.76003	6.73649	5.25498	5.88524	9.45771	5.84759	1.80985	5.44909	1.9355	4.86423	0.399718
TCGA-DD-A3A3	4.54152	3.50145	5.50829	11.5302	4.60493	3.53446	4.54538	3.14753	3.00228	3.57622	2.20465	2.60601	4.37056	2.33044	4.46355	3.43564	1.68887	4.23737	1.98017	1.7394	1.17374	5.74104	19.2744	8.09695	3.86152	9.91565	4.63362	3.58153	6.54251	3.06735	3.28677	5.78216	2.09164	4.82059	6.09195	1.90188	7.27676	5.40993	2.52382	6.643	4.94551	4.03941	10.4747	8.87971	6.73555	8.29019	4.00853	4.25248	0.276466
TCGA-DD-A3A4	7.66967	2.31283	6.20497	9.47253	6.96688	3.48574	3.12293	1.14153	4.04935	1.24105	2.03978	3.11088	3.58583	4.87434	0.377074	8.24703	0.697147	1.36604	1.39993	1.31227	2.10936	5.39992	21.2946	9.56052	3.42089	7.43127	3.68924	2.1732	3.86707	1.41481	2.67143	4.6441	1.56384	1.80819	8.08662	1.99528	3.73516	6.14036	1.43995	2.65173	6.10701	2.76757	8.62727	4.72939	3.8172	5.19993	3.51873	5.61346	0.436907
TCGA-DD-A3A5	2.96558	3.46242	4.32175	5.50026	1.83023	1.50966	6.79393	2.69806	6.55632	3.28964	2.52186	1.26551	4.07059	2.68933	1.87709	4.52762	1.55754	2.91882	5.63685	2.57227	3.86868	7.2909	25.9755	7.10047	4.18689	9.93733	3.13409	2.49282	3.82737	1.65888	2.32706	3.78935	2.48085	1.86839	6.49516	3.58932	3.44023	3.49799	7.50321	3.63503	4.09263	1.44615	2.71131	4.42773	5.91816	5.41618	5.51036	7.68762	0.302451
TCGA-DD-A3A6	7.28454	4.83729	6.72837	3.49446	3.06664	1.61644	4.14619	1.84413	2.52586	5.66706	1.90997	10.4458	2.14614	1.64835	0.229738	3.21249	2.03379	10.7349	3.0871	4.07959	8.28939	7.57015	23.4734	5.94767	4.79132	10.5718	3.724	3.48355	4.99938	2.25602	3.03113	4.03246	1.8659	3.74379	2.94998	1.6816	6.58472	6.7567	2.75658	4.64437	3.96171	1.02058	6.24736	6.02159	1.35471	4.75426	3.78393	3.45759	0.239795
TCGA-DD-A3A7	5.75142	3.76783	5.32468	2.18471	2.33259	6.92055	5.93164	2.33793	5.00386	2.27537	3.38382	1.61368	4.87816	3.79691	0.89047	2.07744	1.85559	4.72335	5.5672	3.36181	2.42025	7.65777	21.4351	7.08725	3.75505	10.5643	3.4703	1.9274	4.47584	2.07692	1.64319	3.8874	1.09368	1.82137	2.86294	2.55009	2.81265	3.88751	3.91611	3.34972	5.32302	3.75822	4.48542	3.89566	6.3291	3.12042	5.53549	8.65975	0.315485
TCGA-DD-A3A8	4.9281	3.91576	1.98337	1.61006	2.10715	2.12781	3.10697	1.26458	4.82335	4.41445	1.84746	2.08533	4.17057	1.37152	1.50308	2.52983	1.3774	3.35847	1.13145	0.858738	4.99498	8.68239	24.9654	4.78379	5.5823	12.8413	3.26434	3.57909	6.33266	2.41219	3.59831	3.53672	2.24362	4.47571	7.28548	1.89545	9.20796	5.96599	1.93704	10.3532	4.5701	2.07138	10.2034	3.7751	1.89966	12.1654	5.54282	0.298236	0.113287
TCGA-DD-A3A9	10.9222	2.25511	6.26225	5.95454	0.982842	11.7068	4.44042	4.39398	6.3564	3.88856	2.30427	1.63759	2.62777	4.70965	2.97998	4.34497	0.502997	1.87369	1.75636	1.03277	3.8523	8.3226	23.4998	6.92805	5.18331	13.9914	3.69199	3.37863	5.58945	2.10784	2.40328	4.68525	1.92315	2.9182	3.72983	3.56262	3.02215	5.26483	4.4059	4.72014	4.60549	7.03108	4.18116	4.58849	8.39289	6.26031	7.76078	6.91604	0.268668
TCGA-DD-A4NA	4.73342	3.40156	5.87156	3.79601	8.08284	5.3722	3.9004	1.83972	0.955788	3.73495	1.85398	5.34271	2.29809	6.19692	2.34875	4.05328	2.291	1.84129	4.47836	3.11804	3.28181	7.75182	16.3901	11.5481	3.85303	7.85077	4.56183	2.13327	3.56924	1.74299	2.32731	4.16266	1.34201	3.43746	7.45035	1.25938	4.16517	5.86193	4.6343	5.64716	3.75268	4.08365	2.94474	6.46717	8.327	11.4297	4.35128	9.19202	0.378778
TCGA-DD-A4NB	6.10268	3.50388	1.23338	2.54615	4.66548	8.04419	4.59136	3.63092	0.837319	3.40201	4.75675	4.40188	4.03339	2.9067	5.65296	3.73734	0.244471	1.48888	2.48015	0.629131	4.00654	7.57704	16.823	10.6578	3.52424	6.54355	4.1767	2.0467	2.72942	1.69905	2.57112	3.14528	1.95504	3.17303	3.52207	1.15942	3.0301	5.43951	2.10904	3.70087	6.3353	2.43755	3.41097	3.57929	5.05163	5.79437	5.19565	2.05772	0.314982
TCGA-DD-A4ND	4.04032	2.75456	5.78848	1.47158	4.85259	3.12952	3.36218	4.28785	5.95825	8.11252	1.83598	4.49894	2.67006	0.796667	1.90893	4.57206	2.89854	2.12433	4.21315	3.07442	3.43861	7.95652	21.9702	9.1149	3.8259	7.25559	3.77041	2.20686	3.00009	1.43492	2.84941	4.01187	3.00671	5.04364	8.25291	2.05324	4.3743	4.11747	6.15026	2.85211	5.61195	3.41642	5.22551	4.76082	2.40012	3.66275	5.18528	2.585	0.303029
TCGA-DD-A4NE	9.13112	2.82925	3.4965	2.01234	3.7156	5.7044	9.24741	4.25657	5.83511	4.70167	3.74936	7.50426	2.76727	3.40225	2.16946	5.70786	3.48495	3.43747	2.36312	1.11138	2.90855	11.5898	18.3074	7.83316	5.19771	11.4357	4.32253	2.73292	4.12295	2.30132	1.60305	2.80926	1.59851	4.0773	2.72728	1.60168	5.622	4.37027	4.11053	4.90473	3.65484	6.45224	6.41276	7.34441	6.37945	3.96701	3.15353	9.93769	0.140293
TCGA-DD-A4NF	6.21678	4.52936	7.28007	3.49276	2.3599	3.35171	6.07583	0.948434	10.0851	5.99204	4.0695	3.04055	9.27042	0.805239	2.77108	1.02997	0.779321	2.98499	3.28828	1.03954	4.7733	10.3147	27.5739	8.84678	4.07996	10.3359	3.38365	1.79515	4.95705	1.72304	2.58778	5.18234	1.26738	3.58732	5.44219	2.32172	4.3631	8.27726	3.91876	4.40674	4.6946	5.41213	5.41216	4.65378	1.92052	3.81901	1.2949	5.97688	0.288984
TCGA-DD-A4NG	3.19583	4.23065	9.065	2.94502	5.94231	6.02195	3.56877	2.92816	1.24062	5.67841	3.08636	3.96349	1.98829	4.00538	4.87654	5.8883	1.42957	2.84621	3.79113	2.17505	0.350712	6.55797	22.6264	6.6771	3.00784	6.73428	3.64131	1.49574	2.61668	1.656	1.18434	2.74548	2.24668	2.2499	3.46316	5.36066	1.75945	4.07263	6.97604	2.88332	5.34826	4.04818	2.98399	5.21261	1.87835	7.72709	3.2106	2.45724	0.336394
TCGA-DD-A4NH	5.45655	2.97315	10.2016	2.76742	4.77226	4.00719	2.84781	2.84272	2.14599	5.81926	3.52947	2.98672	3.90238	1.51266	5.4112	4.03247	0.91605	0.631654	2.3312	0.747428	4.35136	9.11234	17.7982	9.66633	4.76881	9.9663	4.673	3.05551	6.64532	2.59556	3.74375	5.43606	2.4019	7.20858	7.27484	2.41321	5.621	10.3252	3.38328	6.98658	4.24597	4.08677	7.31868	4.93502	7.69595	4.08061	5.46479	4.63962	0.258418
TCGA-DD-A4NI	3.99559	2.88487	5.80098	6.35309	1.51178	3.59571	5.0035	1.8486	3.6756	4.66277	2.28926	6.1644	4.30335	2.65088	3.42035	5.71177	2.15839	5.3577	4.61851	1.23453	2.67721	10.8466	25.6418	11.0907	4.49333	10.2452	4.63768	2.22259	4.97013	1.78063	2.22601	5.2795	1.79404	2.97424	4.24145	2.32904	2.91559	4.92165	2.24342	6.42792	5.26845	3.84576	3.81528	4.9421	4.96748	6.42073	4.34717	3.03779	0.281648
TCGA-DD-A4NJ	4.41043	3.98594	9.94124	5.98167	1.51685	3.89282	3.55185	2.85387	4.63489	2.78204	2.24001	2.84245	1.67039	2.38824	1.81328	5.32114	2.19983	4.14194	3.95235	2.24058	2.1717	11.6798	24.2618	10.384	5.5448	10.0037	5.24524	2.95779	4.71205	2.43866	3.78745	5.59123	2.52675	7.02348	5.02866	3.15923	9.05044	4.76626	5.56837	8.91363	6.41777	4.66834	9.9018	4.09926	1.63547	3.30353	4.49985	5.02017	0.223657
TCGA-DD-A4NK	4.87598	2.97825	3.19304	5.40518	1.84342	5.34282	5.3888	1.33237	5.01243	4.14781	0.816997	1.00195	1.89348	1.60901	7.40526	3.48794	0.522982	3.49555	1.24943	1.40625	1.97268	7.54248	22.2115	8.86876	5.14754	12.294	6.05239	4.36284	7.06	4.27158	3.94161	5.42743	2.65346	8.05563	7.52234	3.87726	4.97913	11.6911	4.01705	9.59942	3.17542	4.5958	11.6634	3.8363	3.8147	8.73435	6.33398	6.53593	0.265017
TCGA-DD-A4NL	8.2602	5.16728	1.04211	2.81788	3.15049	1.63525	3.10368	3.93491	3.17627	4.9219	2.71609	1.18288	5.44828	4.66795	4.305	2.81504	2.96386	0.481208	2.65155	2.18912	2.67096	6.77607	18.3351	9.77418	3.0691	7.35259	4.26203	1.54781	3.17425	1.46045	1.79275	2.59994	0.996166	2.73966	4.20521	0.594229	5.17362	3.71017	0.896007	5.38952	10.5399	1.64336	7.88669	4.82401	1.66178	6.74069	4.54039	2.34522	0.31463
TCGA-DD-A4NN	4.32928	5.52851	3.08887	4.93888	3.56443	6.2136	3.06809	4.31049	2.25092	1.37472	4.04183	2.4487	5.0869	2.83778	3.27058	4.47452	4.3253	1.17285	2.53458	3.52235	3.13361	10.1176	9.59804	17.4905	4.31635	6.81476	7.4814	2.28642	2.88679	3.91388	2.29425	4.67472	3.31425	3.58065	5.89874	5.82019	5.23841	4.80307	9.70212	5.28495	5.50172	4.69412	5.4021	2.16279	5.98099	6.73133	5.29552	3.64922	0.373306
TCGA-DD-A4NO	7.47554	3.13234	1.01692	2.32488	2.8666	2.4101	1.60572	4.18256	9.65593	6.0083	3.70705	1.11867	4.31864	3.27493	1.66581	3.61767	1.18645	6.2445	4.15853	3.34211	0.60006	8.01013	19.1404	12.9052	3.36246	8.49132	5.37547	1.98119	5.0335	2.00875	1.60319	4.1103	1.928	2.14964	6.18871	1.6522	3.4321	5.72275	3.08159	3.81604	5.89743	5.17416	3.32561	6.87809	4.8114	3.19037	4.24191	1.35519	0.392543
TCGA-DD-A4NP	1.75169	4.48578	6.13958	5.35288	3.86532	3.45239	7.35184	5.88445	3.31569	4.46619	4.43329	3.86096	3.37479	2.93294	2.76083	4.82212	2.81029	2.10844	7.84022	1.79015	5.52694	5.11517	14.0885	12.3827	2.82696	6.23625	4.58075	1.46175	2.84836	1.95792	1.01363	4.15919	1.27967	1.3118	5.23555	2.97002	2.72085	7.63809	3.89203	4.26085	4.96998	3.00079	5.2903	5.74279	3.58548	3.16257	7.3992	6.84512	0.523456
TCGA-DD-A4NQ	5.90932	3.22635	3.89294	4.76131	3.85898	5.12471	4.83107	1.4231	4.36076	1.45073	8.54604	2.17621	4.53719	3.29206	3.45157	5.72978	2.22487	3.54014	4.59488	0.85455	3.13157	4.74961	16.9834	10.1383	2.24972	7.52778	4.53608	1.21571	3.33154	2.48963	1.46977	3.20755	1.47149	2.42947	4.89579	2.60417	3.20958	6.12849	4.36491	3.50182	6.48865	4.23015	6.59589	6.07817	7.13617	6.02777	6.37732	3.415	0.43256
TCGA-DD-A4NR	3.04514	3.5217	5.35674	4.219	2.83854	10.2246	7.50079	2.6057	5.7059	4.66622	2.17813	6.02421	4.75113	4.29745	4.7509	2.37032	2.34538	3.21085	2.91244	1.19719	2.42704	8.12414	22.7476	7.48512	3.67985	10.8435	3.57265	1.92657	5.1135	2.06648	1.06954	2.25291	1.53188	3.01038	4.73284	1.62424	2.99001	2.94368	2.23514	4.86142	9.02427	3.63183	6.00216	4.16758	5.5711	2.83998	3.29659	6.40034	0.345662
TCGA-DD-A4NS	6.75061	3.6278	6.80148	4.13005	1.87366	4.064	5.32191	2.01355	7.56729	3.56822	2.01822	6.20196	5.11551	0.147323	1.14566	3.61808	1.27628	4.27384	2.57271	2.97348	1.95821	11.5069	15.624	6.20332	6.44148	11.1302	3.61196	3.22091	6.02284	2.70753	4.06545	3.72821	1.90277	2.92916	5.4413	1.25719	3.33937	5.36513	1.58063	3.9391	5.94505	6.74734	5.90602	7.5347	3.86485	6.31767	3.56521	8.06333	0.106716
TCGA-DD-A4NV	7.28627	2.79646	7.6291	4.24707	3.06427	6.69391	3.98228	2.07164	4.13971	3.27224	4.38002	1.90519	4.07543	4.17886	2.73021	3.55584	1.83438	1.34016	2.64419	2.71987	3.82935	9.70404	23.0652	9.18473	4.85075	9.82987	5.53744	2.3818	4.23809	2.85609	3.28876	5.83209	1.76101	4.43674	7.16943	2.88538	4.16238	5.55411	5.69497	5.75407	5.44532	4.16088	9.63943	3.42626	7.17994	4.6556	4.65947	6.78271	0.261807
TCGA-DD-A73A	4.6043	4.28176	4.88554	4.77557	6.48786	4.06217	6.32006	2.04519	4.19725	3.38767	4.98489	3.2775	4.94128	5.03151	5.18072	4.7662	2.30359	5.07339	4.65811	3.39174	5.4501	7.8543	14.2567	7.12756	4.37773	9.02344	4.32162	3.34615	5.88229	2.79891	3.38785	5.15825	1.83196	4.72713	4.80692	3.47243	3.91816	4.63659	2.10983	6.2075	4.45714	3.25284	4.16753	3.35694	2.47765	4.99259	2.49531	3.84622	0.220306
TCGA-DD-A73B	3.3988	3.47753	8.57703	6.17737	3.28472	4.38981	4.48964	3.64794	8.28322	3.69243	2.14295	3.04806	4.51666	2.53608	5.64017	3.65754	1.17322	3.41355	2.34644	2.38428	4.1739	8.08973	18.1584	7.89747	4.85085	12.8292	3.87948	2.78857	5.72411	2.03752	2.6594	4.49256	1.736	2.35964	4.05171	2.44102	2.51319	5.03436	2.45802	4.23696	6.01341	4.18743	3.1726	5.27121	5.06776	5.32583	5.12491	6.92716	0.284564
TCGA-DD-A73C	7.06365	4.22227	2.80728	5.41243	3.58692	2.87861	2.79236	2.41395	2.58813	3.47126	2.6375	5.10765	2.45279	1.68568	4.07421	4.09066	2.80777	5.43907	2.35295	2.20931	6.50004	7.30621	15.2786	5.91693	4.96154	11.0947	3.29929	3.4457	6.83033	2.82899	3.83101	6.2069	3.00356	4.8786	5.93442	3.03043	6.19422	10.3309	3.03767	7.98371	6.53053	3.07105	6.70507	2.39964	2.69915	5.79437	2.89685	4.30483	0.129866
TCGA-DD-A73D	6.6823	4.14593	6.4848	6.3899	5.33242	5.42584	4.45106	2.42648	4.94663	4.4486	2.67195	1.97821	2.84217	3.57817	1.95629	1.76944	3.29438	2.75604	3.41776	2.58619	5.1011	8.10213	15.5252	10.9331	4.17458	9.69051	4.28882	2.03584	4.48325	2.64045	2.02549	4.40963	4.27297	2.95425	6.19969	5.20348	3.42091	5.0059	5.97407	2.89345	5.36979	4.5135	6.61202	5.39992	4.45613	2.99415	3.83865	4.39961	0.291321
TCGA-DD-A73E	2.71081	4.54883	3.04717	7.47853	5.76432	3.51289	3.18756	2.25293	3.46761	4.30841	1.842	1.37558	2.16548	2.21858	4.29188	3.31146	2.71875	2.16022	1.85117	1.79987	3.21572	6.79838	10.2989	8.13606	3.56016	9.44046	4.51077	2.08281	4.65963	2.84581	1.95857	3.51412	2.12572	1.79311	3.79002	2.21926	2.65792	2.62789	2.79936	2.79078	1.9837	2.89658	3.42192	5.00274	4.0369	3.78619	4.03085	4.46247	0.338614
TCGA-DD-A73F	2.65519	2.07597	6.67327	8.89617	3.68205	3.35307	6.67889	6.53267	2.17511	4.31661	4.17342	5.20692	3.86596	3.70653	6.74266	3.83284	1.92389	3.59018	2.58593	3.5817	2.30817	10.1727	14.7484	8.23702	5.31536	16.1173	4.70879	3.06456	4.69974	2.23154	2.33573	3.99597	1.15394	1.23495	4.26077	2.25213	2.9083	3.39392	2.36165	2.36142	7.28725	2.6332	3.74696	5.52783	4.07861	4.90783	6.49657	5.89935	0.200322
TCGA-DD-A73G	5.20194	3.1992	4.5315	3.17183	2.92073	3.01659	2.31612	3.26004	4.67131	5.54781	2.66265	4.05811	3.99391	2.3813	5.21353	2.88273	4.57226	4.42903	2.91348	2.31833	3.67091	7.54548	16.0536	8.59818	4.09966	8.6996	4.16586	2.26876	4.2208	1.83816	2.00764	4.5031	1.40005	2.85767	5.0681	1.76101	2.72636	4.3879	3.04663	3.81401	4.65116	3.84388	3.4478	3.3241	4.23654	2.94179	3.44931	4.07492	0.333818
TCGA-DD-AA3A	4.71397	4.02607	4.61699	4.12937	4.85689	4.87013	2.07582	1.65914	3.55005	4.47934	0.962923	1.02203	4.96183	4.2053	3.87063	6.14844	3.26352	3.22015	0.671979	1.53	0.597745	10.826	13.4756	9.44548	5.73752	8.35325	5.24783	3.61405	4.94425	3.28279	5.27873	4.26795	2.85484	4.75161	5.87388	1.30882	5.4521	6.79891	3.58299	3.39992	4.87849	3.23343	5.46788	6.83169	4.07945	8.0468	5.40397	10.2495	0.18214
TCGA-DD-AAC8	2.66961	2.7089	2.69052	2.78002	3.56338	2.43486	5.57802	2.83957	8.13085	5.15576	2.86522	3.67823	3.86687	3.07077	5.34193	2.11401	1.30822	1.88065	5.56526	2.59545	2.28185	3.43399	16.8881	10.0776	1.84274	10.7207	4.86336	1.36406	5.56207	2.39566	1.64539	5.61436	2.6484	1.77286	6.30326	1.74208	2.85968	7.93786	2.565	2.04909	4.75453	3.7618	2.08953	4.19444	5.59778	1.87961	5.56326	2.09149	0.506629
TCGA-DD-AAC9	4.24352	5.75857	5.50123	2.85002	3.64318	6.37938	3.65563	1.77817	4.54101	2.46027	2.2543	3.27856	2.89245	1.32503	0.914069	3.54774	0.559789	1.59649	1.0634	0.646947	3.44768	7.30931	17.9205	8.99025	3.4396	8.50464	4.22302	1.86024	5.50033	2.48826	1.60003	5.71996	1.90654	1.12974	8.28852	1.58249	2.06478	7.59391	2.37749	3.18331	7.64302	3.01921	2.62898	5.29827	5.59887	3.84584	2.77742	4.14894	0.324879
TCGA-DD-AACA	2.40332	5.99545	2.79557	1.85925	3.82395	1.60202	4.07481	2.61981	2.85823	6.87476	1.3933	3.38665	5.51838	0.916419	1.35809	6.10557	0.76614	0.336817	6.19511	2.11971	0.265548	4.5872	25.0699	8.50514	2.88675	10.1532	3.97815	1.78954	4.38911	2.00967	2.15608	5.69906	2.0886	2.48311	5.20852	3.34135	2.59292	9.15501	3.36645	6.01357	4.59914	2.01491	2.52008	5.73143	7.25692	5.09352	3.30562	2.35379	0.387891
TCGA-DD-AACB	4.05552	3.34794	5.08522	5.31316	2.74588	4.83487	3.55602	3.21654	3.80176	3.83904	4.40003	4.45662	4.29589	2.58306	2.27758	5.34637	1.15704	1.52	4.01144	1.92754	3.3048	4.35313	21.8447	8.32764	2.11406	10.8949	4.18148	1.62627	4.32441	2.99287	1.4512	3.29266	2.82225	1.35285	4.13602	3.28494	2.52538	4.78187	2.74682	1.65856	5.95825	6.48863	3.31749	2.7254	6.25376	2.59589	3.39639	7.59123	0.459322
TCGA-DD-AACC	3.95796	1.94615	5.56365	4.12798	2.69039	3.14456	2.67938	1.04207	9.87828	1.88936	1.96124	2.36589	7.17672	0.887377	5.92058	1.51619	1.98218	3.44371	1.63971	1.22999	1.33652	12.2342	27.4109	11.9613	6.41278	11.1416	6.46505	3.68292	4.80202	3.06768	2.78479	7.18165	2.18346	3.83464	5.68666	4.19077	7.35289	7.66386	5.75027	7.21011	3.61901	8.31545	4.10275	1.92484	6.51454	4.23535	2.89171	7.90192	0.280008
TCGA-DD-AACD	7.12919	4.08666	2.09827	6.1003	1.93383	5.23397	7.6027	1.76343	4.66504	6.20036	3.20517	2.87868	5.0909	3.54645	3.07518	2.29982	2.03306	1.63583	1.40063	2.4636	7.87562	4.18547	21.5636	11.5171	2.22435	8.78374	5.7485	1.5879	4.86587	2.47198	1.39999	8.49797	2.55779	2.23352	5.88488	3.72818	4.81614	5.84943	5.73707	3.33548	9.24826	3.26533	6.46118	4.71367	3.47964	3.70439	3.58583	2.90654	0.473162
TCGA-DD-AACE	5.55507	3.45654	6.6075	3.13488	2.24632	3.26167	7.98731	3.70145	2.51005	3.23972	1.46901	3.0357	4.06356	1.32133	3.04307	4.63091	1.26359	5.90365	3.04355	0.878147	1.88021	5.42442	29.9815	8.58328	3.18451	10.454	3.99191	1.99905	4.12059	1.88906	1.76266	5.09129	1.28906	2.57212	6.56208	2.79119	3.90409	4.22471	6.51294	4.17219	6.00912	7.58183	4.6417	4.86196	8.28361	3.48984	0.966253	7.37362	0.450394
TCGA-DD-AACF	3.04437	4.02743	3.4272	2.11094	2.12397	8.29241	3.59101	6.00912	4.93869	3.64563	3.80356	1.10745	1.62782	2.74418	2.73072	3.54305	2.58888	1.32779	0.979621	0.990264	5.55658	4.11272	17.8056	6.46087	2.40505	10.3791	3.77928	1.67433	5.35019	2.33362	1.66419	4.60623	1.47753	1.50445	3.31454	1.88521	1.98291	3.54921	0.896437	2.79827	3.23471	1.78011	2.14427	3.5173	1.46646	1.82019	3.42763	1.51084	0.402387
TCGA-DD-AACG	6.49284	3.31143	1.9037	4.61323	2.91822	2.09587	3.66095	3.1021	5.28328	8.00459	1.60649	1.69074	3.28041	0.616647	5.28788	5.10766	1.37021	4.67758	2.33995	1.84905	0.692641	7.53754	15.0288	6.59186	4.8719	10.9784	3.86656	4.10052	7.96689	2.17188	4.01511	5.92925	1.8507	3.79541	4.83647	1.44885	5.65242	8.39305	0.247458	5.55947	5.34112	2.34101	7.48402	3.74308	1.47066	8.09099	7.11089	2.28407	0.205759
TCGA-DD-AACH	5.36479	4.41551	2.13577	9.16466	1.36022	5.23568	7.43153	3.69116	4.81924	6.63201	1.69143	6.84912	4.42167	0.607498	0.961338	2.38633	1.41089	1.12999	3.40935	0.925979	3.05262	4.42925	13.8045	10.2635	2.97427	10.5694	7.48242	2.85428	9.76117	5.13805	2.7574	8.7774	3.18762	2.85727	8.14274	4.10453	3.69206	6.81856	4.04628	3.92969	7.33929	1.98877	5.66678	6.88517	2.5625	4.74932	5.99067	4.29004	0.363395
TCGA-DD-AACI	4.13537	4.9643	3.84391	3.10294	2.86619	3.47515	5.78799	1.83481	5.86637	4.0808	2.3104	2.49488	5.10155	1.00683	5.3666	7.28266	1.34068	5.7186	3.07864	1.60137	0.752548	6.72975	29.4131	9.21227	2.86367	11.6685	3.61108	1.27322	5.29439	1.45085	1.6544	3.92335	1.20919	2.06335	9.1058	2.08349	1.21579	8.31764	3.67934	3.3067	4.84481	5.82328	3.93338	5.96784	5.94933	3.61835	2.41277	3.96259	0.52241
TCGA-DD-AACJ	2.20247	4.58888	1.34923	2.93266	0.997095	4.31927	4.28423	1.86946	3.02869	4.11521	1.92973	4.27563	3.0632	3.44682	2.07611	6.92999	1.49167	3.16896	3.49612	0.406997	1.16653	4.89146	22.8026	7.13609	2.46864	10.8398	3.07867	1.39327	4.5404	1.51694	1.48146	2.68712	1.81185	1.22084	7.20231	2.55985	3.08529	6.49824	2.67241	2.16495	5.49704	3.29248	3.73248	5.3388	3.09001	2.98788	3.16397	1.14932	0.441577
TCGA-DD-AACK	10.1854	0.452008	4.29084	4.04928	2.51666	4.16133	4.29195	3.44491	3.26091	2.27257	1.94263	3.15971	6.28101	2.62399	1.34199	1.83324	1.19561	4.71	1.64995	1.96639	2.2986	10.9587	24.0119	8.23794	6.10948	12.2695	5.40491	3.45479	5.36842	3.18929	3.78551	5.31705	2.18597	4.44726	5.51658	1.43959	8.82407	9.3961	4.88564	7.3826	6.70226	4.97672	6.74466	4.4938	8.36098	6.44579	2.70836	2.95444	0.196899
TCGA-DD-AACL	5.06229	2.05302	7.18729	4.01564	1.30309	1.89543	5.58247	2.65306	6.88344	1.83013	2.06997	5.13715	2.20704	1.77381	1.64605	1.71655	1.63693	1.20606	2.42125	1.28776	2.32888	7.44202	23.6787	7.19976	5.58376	12.9516	4.29262	4.00099	5.97291	2.19963	3.7331	5.23289	2.13744	6.83688	4.7661	2.04339	9.48757	4.78262	1.88409	6.83125	5.48271	2.00203	8.83338	4.85425	0.917698	6.18138	5.56721	5.72774	0.193774
TCGA-DD-AACM	4.91591	3.5313	4.1987	4.79199	1.57751	2.7117	3.00761	3.78661	10.6816	4.63638	1.53771	7.10827	4.13198	3.22869	9.34357	1.35343	1.97379	5.20841	3.39304	2.97594	1.75027	8.69077	22.9882	6.59977	4.46296	10.6391	2.82741	2.02053	6.82323	1.37512	2.68726	4.77738	0.802187	2.93919	4.77364	0.958628	6.33477	6.36163	1.11559	3.18926	5.81655	1.11698	3.20036	5.49554	2.08188	6.72727	3.83016	4.04094	0.249332
TCGA-DD-AACN	5.9183	3.52047	2.89313	6.78027	1.85386	5.4456	2.34968	3.79592	1.7891	3.46856	2.59033	2.40235	1.8378	1.78696	1.15516	2.40723	1.68074	2.27868	3.14389	2.22381	1.02834	11.3446	17.6621	10.0145	5.48794	10.2396	5.59515	2.5633	4.30243	2.94161	3.69499	5.70419	2.47412	7.8054	7.23613	4.4585	5.483	4.81965	3.52071	7.13795	7.06209	2.90207	4.82297	3.6729	2.9477	5.48237	4.03471	4.33738	0.191111
TCGA-DD-AACO	8.85642	4.31314	2.09784	4.0104	2.78646	6.72926	5.03365	1.64009	1.66609	3.18067	0.922347	1.41027	6.35648	2.68708	1.15018	1.87447	1.84142	7.9347	0.908668	2.90272	2.14441	5.37752	22.0368	8.89993	3.49306	11.2013	5.03692	2.3609	4.94741	2.60291	2.78506	5.10546	2.96637	3.41961	8.54501	3.80808	5.86659	5.64127	4.50974	7.40955	5.04771	2.70324	7.09452	5.6108	2.27155	5.33093	2.94813	0.685817	0.376309
TCGA-DD-AACP	3.38136	3.41496	4.36571	4.81002	1.12127	4.0304	5.57869	1.90994	0.756043	3.21243	2.70657	1.75161	4.59972	2.82813	2.81617	5.81893	3.06968	1.9451	4.34124	2.3654	3.84809	8.32703	20.0562	11.4202	3.87364	9.81218	5.65487	2.16134	4.90196	2.23555	2.03127	4.94962	1.5121	3.55724	5.90968	2.33561	3.56152	4.64803	2.22308	3.59519	6.09843	2.4959	6.63659	7.0548	2.05989	4.42988	2.65882	3.67848	0.326835
TCGA-DD-AACQ	3.99575	2.91327	1.65866	6.93034	2.5569	2.11485	3.55512	3.08159	3.00582	5.37594	0.826793	1.49928	4.99919	1.50868	3.98298	3.61627	1.93497	0.391823	5.2415	3.15779	1.02805	6.77713	11.6025	18.0334	4.59974	10.0702	8.93045	2.58269	6.10099	3.25373	2.69697	8.36817	1.82117	4.37445	13.1705	1.00631	7.79211	6.80903	5.10079	6.40125	6.75322	0.986332	4.87116	7.56144	0.986543	7.17858	5.64423	0.845705	0.414009
TCGA-DD-AACS	6.36379	2.12725	4.07189	4.99644	3.39874	0.863182	4.81768	2.34742	4.57779	6.70683	2.87664	1.53248	3.00333	2.87438	2.74973	3.66227	3.11921	3.84432	4.43709	1.44209	5.15743	8.66989	21.2024	9.13692	4.17992	11.1326	5.02085	2.4061	5.93618	3.39728	2.76132	6.75215	2.88425	5.6878	9.09679	5.48586	5.9291	6.50607	3.16173	6.41025	4.1449	0.868655	6.03821	6.31407	6.05522	5.70644	2.43657	2.40309	0.245566
TCGA-DD-AACT	6.39224	1.24948	1.40013	6.46727	1.80757	3.80819	3.16127	1.20944	1.41065	1.45533	3.15805	1.96931	4.88886	1.54106	5.77573	6.3287	1.01736	3.51957	6.31363	1.10982	2.23645	7.38124	25.3505	8.83118	4.05785	13.2199	5.28691	2.30211	5.78963	2.82479	2.27241	8.82075	1.7103	2.28491	8.68586	2.15193	4.75486	7.65261	0.749735	5.80479	3.01871	1.3853	1.95986	2.35406	3.34317	6.49105	2.13959	1.13708	0.307488
TCGA-DD-AACU	4.77637	2.27039	5.83251	4.2321	2.06609	7.81991	5.25508	2.49829	2.14647	4.23446	1.69135	3.26591	3.54085	0.592787	4.21092	3.93729	2.49425	5.57972	3.21439	2.38974	5.61941	9.72479	28.0418	8.46836	5.17059	12.1551	4.26432	2.37826	5.58152	1.8788	3.10985	7.42961	1.51638	5.0758	8.61539	2.76611	5.6966	7.19239	4.89571	7.70273	4.6665	6.97268	5.85804	3.56748	6.28759	8.28921	2.95746	4.84592	0.280957
TCGA-DD-AACV	6.26242	3.6236	0.110553	4.89691	2.53302	1.9396	2.72585	1.98174	0.618854	6.09374	2.02115	1.47919	4.51876	1.5034	1.69699	8.66642	0.680971	0.447833	2.13962	1.36643	6.96767	6.44421	27.025	9.20621	3.23264	11.9271	4.03763	1.49548	4.4486	1.54174	1.75421	6.80642	0.831361	1.85907	7.20568	1.03223	2.26106	6.87827	0.962546	1.53233	4.2069	0.575288	2.12959	3.28164	0.52331	4.87265	4.10715	0.606125	0.388872
TCGA-DD-AACW	2.02602	4.68089	6.47005	5.12897	2.3301	2.60785	6.51449	5.25201	0.416066	3.53554	1.77513	1.659	4.32178	1.60736	1.58502	1.30262	1.08956	2.04124	1.29817	2.73924	0.802446	8.58075	16.878	11.7716	4.17293	7.9148	5.10248	1.96525	3.06091	2.30884	3.10741	4.5505	2.97329	5.70882	5.79081	3.85033	2.5277	6.77045	2.59586	5.69566	7.70694	2.04449	4.35636	3.78246	2.75608	3.00954	2.22691	1.06186	0.37788
TCGA-DD-AACX	3.59367	5.48269	2.08373	6.20467	4.03254	2.38041	6.10446	2.26618	2.65041	5.24277	1.88533	2.12363	2.49721	1.49706	1.66879	2.02674	1.64841	9.30554	0.823081	0.246304	7.5927	6.67619	18.0736	8.87609	3.66239	9.29667	3.88705	2.50793	4.81276	1.91106	2.48596	4.44828	0.754172	3.15301	7.48723	1.23662	3.85801	6.27078	0.644216	1.9542	4.8713	2.00803	4.04955	6.34718	2.08484	4.89751	2.60286	3.35806	0.368625
TCGA-DD-AACY	4.32519	4.86916	3.65246	3.93307	3.69338	2.87512	2.73981	2.11998	1.04938	3.36133	1.89318	1.96383	4.53367	1.28073	2.72322	4.17596	2.35662	0.871016	3.86317	2.17908	1.58523	8.2311	23.9343	7.69464	4.39538	8.9921	3.44996	2.46796	3.5047	1.26499	4.42327	5.27858	0.729355	5.82666	6.1753	0.80832	7.35063	4.4217	2.38891	8.11634	7.38166	1.67945	5.64718	5.47097	2.02665	7.55064	4.20518	5.78992	0.227678
TCGA-DD-AACZ	4.24946	3.7066	4.22272	4.45791	4.68783	2.3941	4.17802	1.4638	2.97699	4.2055	0.915044	5.21857	1.42086	1.77715	6.94138	4.31647	2.47718	6.73099	3.51394	4.0539	6.75944	9.37135	17.0655	7.22339	5.45278	10.0143	3.06847	3.95062	6.23807	1.32163	3.93882	5.75949	1.34136	4.45679	4.38339	1.80075	5.19132	4.4706	1.89248	3.96676	6.64108	2.77101	4.92729	5.55559	3.31838	8.57387	6.28087	2.99673	0.199501
TCGA-DD-AAD0	3.25242	2.24526	1.56822	1.81607	2.60802	8.05693	1.79317	2.85228	1.21466	4.14818	2.45817	1.66207	2.42233	2.31427	2.11822	6.31901	2.16427	2.18582	2.80588	2.8534	9.30656	4.46107	24.6511	7.94583	2.52651	10.587	3.36573	1.5402	5.04441	1.79623	1.46077	5.32673	1.91264	1.92109	7.00302	1.28876	2.48787	4.98882	1.26446	2.50166	5.11045	1.54293	4.10337	2.3507	1.5304	3.4267	3.9105	1.70923	0.412045
TCGA-DD-AAD1	9.21815	2.86811	7.32006	4.56647	4.0513	6.70256	3.82512	2.79682	6.26402	3.11465	1.82079	4.04947	4.3637	1.26069	3.07944	3.29875	1.62275	3.59476	3.74625	2.12872	1.70948	9.5812	24.4205	7.68743	5.37208	13.8635	5.04359	2.57377	4.64021	2.81792	2.89246	5.19532	2.46261	2.66351	5.38141	5.19375	4.41592	8.46663	5.70703	5.36565	4.93633	10.049	3.55236	5.76789	7.27235	5.94578	2.18159	5.1973	0.244015
TCGA-DD-AAD2	4.6114	2.94745	2.09408	3.40474	5.21961	1.64601	8.25296	5.46795	4.4735	3.02764	2.23166	6.31001	3.04602	3.16881	5.31266	2.59353	1.52054	1.7845	6.76373	0.763166	5.40377	4.54878	22.1826	10.8564	2.3821	10.8675	4.91241	1.42151	4.87236	1.99358	1.18253	4.73864	1.64269	1.85422	4.88637	3.08312	1.2693	5.98975	4.91634	2.89752	4.09229	6.09262	3.06797	4.33587	2.94609	2.30791	5.56093	5.75452	0.60035
TCGA-DD-AAD3	4.75894	1.28252	5.41403	8.06324	3.60021	5.17796	4.18731	4.03317	8.26267	7.0302	1.70488	3.47054	3.73692	2.56924	3.1644	2.42915	1.4493	1.89282	0.753419	3.25786	2.38602	6.27204	19.5152	8.67833	3.0843	9.78032	4.35261	1.8195	3.99936	2.33827	1.64379	5.23744	1.75224	2.04525	4.25853	1.48447	2.62075	7.8289	5.02027	2.88306	4.57277	3.14591	2.6877	3.83599	8.08231	5.3914	5.79497	12.722	0.42096
TCGA-DD-AAD5	3.55514	4.82285	4.52203	11.5414	3.46997	3.61932	2.63676	4.14744	3.26756	5.18407	3.16626	4.14986	6.29203	2.68034	4.60378	7.19969	2.50321	4.61978	7.42612	2.45145	4.60197	2.78713	10.0275	6.94883	1.95915	7.83937	4.68897	1.89887	6.49512	4.11753	2.26962	6.12816	3.31358	2.81338	6.71289	2.69263	3.73185	9.05523	3.48669	3.85817	5.65187	3.06865	4.52713	3.50947	5.03126	6.9777	5.91152	2.06677	0.29218
TCGA-DD-AAD6	4.55905	1.12017	6.16606	3.46504	1.34631	4.23649	3.83072	3.40155	5.35251	5.75153	1.5621	5.89165	2.81402	1.39252	3.44157	2.33103	2.02761	3.24778	1.67521	3.60283	4.99795	4.77362	22.5998	7.36274	2.90857	10.8053	3.81625	2.1737	4.33054	2.31026	1.88688	4.77248	1.62231	2.80032	5.94074	0.79975	2.93385	4.44171	1.29317	3.30734	5.51133	4.40253	3.42982	3.62148	5.62838	4.04532	4.2876	7.76506	0.43256
TCGA-DD-AAD8	7.63197	2.65695	4.1727	7.0158	1.79341	5.04122	5.48395	2.54838	1.78687	3.73524	1.53469	4.63187	6.85322	0.885098	2.61219	5.13103	1.21806	1.58797	2.85884	1.36809	9.23835	4.93535	23.792	9.69568	3.2953	14.9613	5.79542	2.76108	9.13988	3.37413	2.66159	7.4722	2.13249	4.48008	9.67278	2.28766	3.49885	7.37232	2.77136	6.98468	5.54725	5.08191	9.43117	2.9637	7.27075	6.40185	2.32608	1.09587	0.41852
TCGA-DD-AADA	3.9266	1.39865	5.82902	4.21905	2.95342	1.95956	5.33821	1.74195	1.16843	7.99219	2.06181	3.3001	6.69428	1.44098	1.77531	5.62094	1.33827	8.96427	2.02017	1.56941	2.12583	7.34129	25.8244	9.37588	4.12213	13.1189	5.24501	2.29239	5.90211	2.2242	1.9213	7.22871	2.73752	3.34994	8.35728	4.53725	5.63004	4.87429	6.63133	5.51406	4.93406	4.69609	4.67654	3.33754	3.3709	6.4471	3.55928	2.78851	0.37687
TCGA-DD-AADB	4.62277	2.27414	1.91246	3.60522	2.53965	3.38646	4.4235	3.40165	0.70324	1.31681	0.567835	5.25455	2.09211	1.35753	2.23506	3.43	0.457938	7.20898	2.97659	0.644942	4.65742	8.56706	21.6062	7.14638	5.70202	12.9318	4.19892	4.38829	7.18638	2.52629	5.87673	7.02257	1.80145	5.3009	7.93338	1.20497	7.32613	8.10325	0.658791	9.64868	3.8841	2.27088	5.83435	6.27403	1.37587	5.70276	3.15008	2.68358	0.146686
TCGA-DD-AADC	4.3218	2.39	6.65423	7.07545	3.40644	8.19865	4.70173	3.94593	8.2702	6.39447	3.05753	4.58873	3.58542	2.99547	8.16247	5.50147	1.74012	8.60639	2.95268	0.635273	3.86336	7.24171	26.8968	7.16433	4.33929	11.9832	3.79572	2.97063	5.3109	2.191	2.60071	5.45176	1.67902	2.59613	6.69712	2.31712	3.75189	6.528	1.14646	7.38821	5.08169	1.40991	3.38242	3.9913	2.7277	4.42072	2.96424	4.97277	0.280148
TCGA-DD-AADD	2.49589	2.94937	10.274	5.08265	3.23221	3.73428	3.83647	2.74646	11.3557	4.58931	1.64129	4.97316	8.67328	2.29004	4.31092	3.82427	0.889496	0.511151	4.50031	1.23839	0.618475	5.36845	28.4529	9.3458	3.03768	13.9579	5.21103	1.4937	4.17502	2.65706	1.52444	4.52888	3.02993	2.26937	6.07726	4.82983	3.67008	4.1718	4.87267	4.16917	5.60931	3.56908	4.60649	3.79058	4.95361	5.00704	3.8341	10.5108	0.436322
TCGA-DD-AADE	3.95022	3.37505	3.24273	8.89458	4.00097	3.86103	6.09207	5.10567	4.5395	1.99712	3.78603	2.95301	5.74705	4.22623	1.04417	5.99135	4.15118	1.43467	5.57534	3.76091	0.437573	3.75653	14.6712	7.60695	1.89081	10.3902	4.66089	1.89679	5.72196	2.38507	2.10483	3.97988	1.69464	2.12856	4.33824	2.15046	1.89568	3.78853	2.54341	2.74822	5.15245	5.1824	1.96459	5.12068	6.63385	2.82188	5.27881	4.31491	0.405764
TCGA-DD-AADF	4.53515	1.89169	4.85523	6.04506	1.44425	1.80335	7.04008	2.11003	2.55936	6.41562	1.22408	3.70996	2.39946	2.94314	5.84358	2.33262	2.68614	4.27349	0.33639	0.693098	5.57564	7.4706	21.308	7.08579	4.49569	18.4314	3.74584	2.62353	5.80116	2.23015	2.2161	4.43802	1.38004	2.79212	5.08423	1.9783	6.0637	5.45077	3.2096	8.09869	6.74625	6.24456	5.65813	4.19958	5.57476	3.23709	2.22528	7.95839	0.303633
TCGA-DD-AADG	4.80765	5.97293	4.10381	6.28895	0.538605	2.16338	2.38139	0.797321	3.0039	9.10081	3.85677	2.63476	7.25186	1.89753	1.68759	1.00018	2.31656	4.54422	3.70153	1.02786	5.17239	6.87644	30.9865	9.24541	4.01778	10.8188	5.2353	1.90895	4.39369	2.35207	1.90527	5.4664	2.13543	3.9519	6.4707	5.84819	5.88341	4.0743	5.20457	4.79356	5.16861	8.55536	6.8026	2.21418	5.73976	4.20397	4.30762	4.69951	0.373563
TCGA-DD-AADI	5.63386	2.8124	5.53095	6.28894	3.5027	2.51037	8.46222	0.315162	2.82675	5.00187	0.404254	0.573157	3.25456	3.25578	5.47971	3.53099	3.44923	1.70664	5.49754	0.908377	1.15493	6.89789	24.5446	8.98687	3.31771	14.9464	5.51296	2.07318	6.90126	3.83598	1.44688	5.97563	3.73922	2.1809	5.72493	5.68604	1.97636	5.96311	9.86741	3.3752	5.37617	7.6514	7.01297	3.61928	6.23988	4.27245	1.67115	4.52627	0.451016
TCGA-DD-AADJ	5.09956	1.75457	3.57711	5.0274	2.36675	4.36405	3.95496	3.83523	6.7438	1.83388	2.2614	4.20276	3.74239	2.5449	4.01682	3.17542	0.791628	7.3629	4.51352	3.96228	6.47243	4.83723	28.2542	6.59539	2.92952	11.3492	3.26188	2.06923	5.71992	1.88007	2.03305	5.00367	1.66436	2.08	5.31487	1.14034	4.39868	6.38112	1.36799	4.02983	4.51823	2.61692	3.07717	6.37118	2.10066	4.55877	2.96616	4.01683	0.280753
TCGA-DD-AADK	3.57059	2.58823	5.41117	3.63705	1.41488	4.97544	3.20873	2.16736	5.84627	4.22745	2.72799	4.93581	3.31007	1.73083	2.16704	3.13258	1.10808	0.926132	1.0784	2.80343	0.920817	9.82435	34.1433	9.10652	4.2856	12.0202	4.20297	1.84172	5.68691	1.69095	3.30988	5.04896	1.33919	3.52369	5.38532	2.59015	3.70905	5.79131	8.17142	5.29912	5.318	7.80352	6.21142	3.76875	4.51411	4.53153	3.02526	10.099	0.339374
TCGA-DD-AADL	6.76908	0.883779	5.0156	3.38448	2.46439	4.05605	6.13117	1.23632	4.79701	4.334	1.41467	1.80956	7.70363	0.807445	2.11168	0.824933	1.37087	1.52665	5.59783	0.745331	1.47669	7.6138	32.419	6.72373	5.29706	11.9487	3.99193	3.60204	4.02416	2.17873	2.89772	5.70758	1.56753	3.83591	6.19894	1.10786	3.88332	6.62489	3.60119	7.59211	4.50676	3.0972	6.38382	2.11101	2.00312	7.79451	3.52069	2.23579	0.237488
TCGA-DD-AADM	3.43587	3.15606	4.42279	3.85868	2.41856	3.49369	2.02243	2.56024	2.33907	1.73355	1.74118	2.98008	4.09964	2.93498	1.70541	4.76625	0.228915	3.7056	4.16122	0.513219	1.89582	5.81336	29.0098	7.78706	2.97284	10.6345	3.43454	1.70788	4.65278	1.39206	1.62128	8.35783	0.983461	1.70056	3.8105	0.437102	3.48888	7.58755	1.04315	2.24752	4.07853	1.5767	2.61131	4.01937	2.11939	5.15154	2.55906	3.17305	0.387323
TCGA-DD-AADN	6.89267	4.93817	4.23267	3.75511	2.95352	2.20282	4.01334	3.54542	4.92651	2.35427	3.79783	0.65893	4.49022	3.18427	0.0734193	5.57701	0.742939	4.81056	3.81531	2.93728	5.83439	9.49954	15.7847	9.71542	4.91953	8.58766	4.05474	2.84438	5.53359	2.34866	2.51914	4.57041	2.33431	2.92013	5.4148	2.7384	3.84329	5.25647	4.04806	5.30778	7.14599	5.32838	6.60268	4.92794	7.59852	7.3466	5.88477	3.5749	0.301515
TCGA-DD-AADO	2.71217	3.32664	3.14354	1.86519	5.67439	1.48548	2.83586	2.24513	4.9254	3.49084	2.08277	6.34689	4.85922	4.79333	1.85923	5.32472	2.26771	5.03728	0.727529	4.44916	2.09217	3.75579	12.5665	8.30807	2.15147	9.50449	4.9888	1.44417	3.86116	2.81397	1.15966	2.80963	1.73457	1.34604	3.78914	2.42048	1.78969	3.78064	4.46583	2.17556	3.60397	4.1453	3.77094	5.42909	7.4222	1.62201	4.15527	6.12032	0.514536
TCGA-DD-AADP	4.81851	3.66985	4.79443	3.97546	5.3628	3.90637	7.48438	1.44633	1.95627	2.89369	0.989975	5.5111	4.63892	2.43917	4.59694	2.79038	1.77393	3.25374	2.1499	1.03279	1.2972	9.28791	22.2619	10.1224	3.97168	9.10542	4.84298	2.04435	4.95052	2.07461	2.6116	6.11813	1.23136	2.86498	6.07692	4.25327	3.75687	5.34856	3.85565	4.67598	5.13661	2.98151	6.50973	5.10481	3.02805	2.69699	4.41519	3.50901	0.312828
TCGA-DD-AADQ	6.88078	4.06156	2.602	6.40263	3.17795	4.68636	3.6015	1.38587	8.45041	2.86255	2.63783	1.64864	3.77411	1.8402	0.863631	4.43181	2.15861	5.04285	4.15302	0.483255	4.73905	5.91984	24.4538	8.33546	3.93835	11.2739	4.11846	2.71713	4.18783	1.90324	1.87137	4.90548	0.957376	2.23893	6.35895	1.98326	2.34218	5.10505	1.04398	7.16409	3.89249	3.4243	5.46316	7.685	4.39291	2.13115	3.68513	5.7721	0.38456
TCGA-DD-AADR	5.30309	3.34631	1.20044	2.33906	4.36654	2.56345	5.83061	2.53383	6.09399	5.06127	1.07003	5.32877	5.98828	1.26611	0.545605	1.93301	2.08321	3.60212	4.02228	2.31207	4.46512	5.39004	21.2279	6.83086	3.61802	10.1859	3.10416	2.64782	5.43068	1.2355	2.29734	5.22134	0.585003	2.91415	4.3165	1.21479	3.09305	6.27	0.422418	3.956	5.46821	1.06209	3.64917	4.0051	3.16643	5.84076	8.17441	1.25842	0.324877
TCGA-DD-AADS	2.91362	4.35956	3.41816	7.11537	2.75257	6.09655	2.97123	4.74805	4.50457	0.997995	3.67025	3.37223	2.36643	2.75095	0.340672	3.48528	2.60552	1.32135	3.45243	0.660836	3.29132	6.64467	19.6897	6.87823	2.86889	9.76538	4.00753	1.38777	2.8931	2.34487	1.23983	3.82288	2.55902	1.01397	2.61805	5.117	1.27984	3.89512	3.44946	1.50985	4.40457	4.41026	3.32655	2.40181	4.48515	3.52702	5.10487	2.66502	0.632891
TCGA-DD-AADU	5.91806	0.559208	4.29612	5.27847	1.70083	4.67668	4.69072	3.69045	6.5101	2.43927	1.86776	4.2799	4.17236	1.41669	2.60304	7.72038	1.68376	5.15387	5.18376	1.16057	3.63281	6.6952	27.7647	5.05196	3.59824	10.6719	3.55651	2.24237	4.79189	2.94767	1.49659	4.26531	1.79274	1.77679	5.71066	1.56676	3.25224	6.19773	0.994323	4.41412	4.94697	3.77438	6.37167	4.96432	4.02122	5.35678	5.3776	1.56957	0.271612
TCGA-DD-AADV	5.16398	3.73036	3.30358	7.76229	1.80505	1.01097	6.22295	2.44282	1.4553	12.4681	0.879969	3.29896	5.28092	1.60869	5.62351	7.0262	1.91389	1.96169	7.75028	4.08787	1.53465	3.72221	33.3152	7.54829	2.13135	10.1319	4.54597	1.73678	3.24485	2.35312	1.22287	4.44962	2.17154	1.50132	4.40601	3.36969	1.6114	4.55215	7.82422	3.75914	5.20371	10.6129	3.89873	3.97657	9.79387	3.2885	3.82183	5.93939	0.451795
TCGA-DD-AADW	4.27038	3.00295	4.78392	5.98192	3.03606	2.48642	8.97234	1.53645	0.692843	5.16136	2.16773	4.23189	3.66036	1.64902	3.52729	3.20818	1.02739	4.32951	3.84417	1.6628	1.85091	11.7336	24.1408	9.17958	4.77608	11.5848	5.96428	2.45087	5.31269	3.8163	1.72806	4.35332	2.66002	2.51129	4.65416	4.38135	5.95898	8.15847	8.9982	4.22108	5.66395	7.32479	7.1571	4.99063	10.6898	4.79889	4.72379	7.38809	0.182431
TCGA-DD-AADY	3.2568	3.79747	4.51987	3.68836	1.53671	5.83161	6.40635	1.50065	4.72724	4.42668	2.00932	5.21904	2.11572	0.648815	1.55329	4.70197	0.871202	2.25698	5.72714	1.2454	1.40312	8.23564	29.0849	11.258	4.39237	11.7421	6.16578	2.32095	5.34327	2.65915	2.64211	10.7501	1.42978	5.19899	5.20953	3.77994	5.79943	8.98538	8.6034	7.43973	5.5002	9.1477	3.9163	2.2842	4.10691	6.78702	1.97098	5.49457	0.382699
TCGA-DD-AAE0	2.96229	3.31065	3.2962	5.0324	2.59505	6.58335	3.04573	3.07609	2.78256	2.38457	1.42489	3.7135	5.59724	0.765476	2.47256	6.78508	2.35836	5.31218	5.6007	1.33334	3.18433	7.77355	26.5386	8.034	3.25898	11.5892	4.20384	1.72866	5.26264	1.90759	1.53636	3.68123	2.02664	2.20241	5.37507	4.4258	3.03448	7.05605	7.6034	4.02722	4.12696	9.79319	3.38714	5.56473	9.16771	2.71894	2.60231	8.21254	0.353301
TCGA-DD-AAE1	7.3471	2.1121	3.86762	4.77824	3.79378	6.01928	3.23302	1.98654	7.99784	2.7204	1.97299	2.25914	4.56322	2.20169	3.20506	2.8121	1.12767	6.79512	4.89425	0.837144	4.4806	11.2485	22.8661	8.01596	5.46193	15.1511	3.87046	2.35625	4.87254	1.47557	2.72248	6.66267	1.08619	6.25233	7.93372	0.885365	5.62681	6.3919	5.44672	2.46503	6.01224	1.74838	6.13894	2.19212	2.95012	6.18711	2.62399	1.95902	0.211148
TCGA-DD-AAE2	2.98523	3.52441	6.57974	7.01696	2.19948	1.24419	4.73653	2.54725	8.81507	4.97583	1.37088	0.932237	1.48385	0.77863	1.49621	4.16258	0.605476	2.92674	0.149194	2.04069	2.63771	7.06107	29.3457	7.89052	4.05074	12.3317	4.39615	2.4533	6.00165	2.30531	1.98093	7.0484	2.18649	2.34395	6.73375	1.42532	5.42925	5.20958	2.56368	4.57423	5.29306	4.88208	5.95862	2.23362	5.72707	5.89156	2.89065	4.81203	0.310429
TCGA-DD-AAE3	2.64998	4.8141	0.576534	3.67252	3.75245	1.45845	3.50356	2.64957	2.70282	4.99804	3.48994	7.10996	1.71987	1.08555	4.23539	6.67655	1.07265	4.07668	2.73024	2.14764	4.01329	3.99573	27.9229	3.7629	2.40696	14.3211	2.40558	1.73083	4.62566	1.61361	1.36695	2.84467	1.34669	1.4263	3.05879	1.28868	2.08734	5.01108	1.31916	2.55129	4.06365	0.666218	3.66978	4.05942	0.788251	3.45463	3.9624	0.364477	0.410392
TCGA-DD-AAE4	2.47487	3.70158	0.7628	4.5796	1.30672	1.37566	3.60708	2.06241	2.80477	1.99064	2.14746	2.78286	6.65597	1.69606	1.47612	1.63925	2.11136	0.142959	3.71498	0.224466	0.946657	5.76819	30.2541	7.00584	2.8695	9.90777	3.89539	1.55402	3.55399	2.11298	1.24429	3.09449	3.5226	1.68315	5.03164	4.55709	2.04487	3.54791	3.20707	2.8353	5.10042	1.83969	4.52434	2.97174	1.70662	1.57841	6.60502	0.592366	0.488263
TCGA-DD-AAE6	2.79758	3.93897	4.80614	3.37113	4.30776	3.27218	5.73321	2.8068	4.46732	7.65266	2.10307	8.14119	3.92028	2.78115	2.32698	4.47682	1.90972	0.893129	3.0151	1.88236	2.72054	7.41493	21.5962	10.2799	3.39974	11.1333	4.77434	1.76876	4.66547	2.02892	3.12922	7.19156	1.88454	4.34383	7.57985	8.48722	7.06363	3.51451	6.33787	4.51717	8.92852	11.3474	3.53974	3.83014	5.93049	5.51518	1.86139	7.34093	0.449171
TCGA-DD-AAE7	4.76613	2.81332	7.25855	5.963	2.26153	4.2944	5.25447	0.950907	2.40969	2.09952	1.97387	7.824	5.91081	2.07944	1.37191	2.69576	1.55562	1.98401	4.35873	0.760893	1.33189	10.4935	28.6151	7.1086	5.44891	11.7687	3.70606	2.63626	4.35868	2.05722	1.98922	6.76309	2.80663	3.36712	5.32101	5.51126	5.92616	7.69251	5.25563	8.81441	4.58283	5.26551	5.61661	3.8466	5.66479	3.90233	2.75225	3.10569	0.293872
TCGA-DD-AAE8	2.50651	2.90817	5.55538	3.7591	1.1483	2.52663	5.16009	0.661997	3.83417	4.00172	2.86241	1.63068	1.46565	3.86929	1.62133	2.74482	3.51529	1.87169	2.08446	1.77838	2.40072	5.72114	32.8016	8.888	2.92478	10.0518	4.49816	1.30087	3.28786	2.15798	1.14482	6.58863	6.63943	1.55924	5.57272	12.9244	2.94979	4.82506	11.4754	1.51231	5.39242	8.06126	1.80119	2.41627	4.82819	2.4328	3.95921	4.35713	0.507785
TCGA-DD-AAE9	5.15212	4.1223	3.48213	3.16338	2.75823	3.83084	5.0529	1.85824	2.78787	4.17004	1.9033	3.80236	3.37305	1.85966	3.32964	6.17916	2.5821	3.27605	4.18607	2.45713	2.70391	4.04659	20.9139	12.7682	2.48815	10.1844	6.05973	1.33316	3.81506	3.15242	1.00492	7.17706	3.45641	2.12007	7.49968	5.53945	1.43486	7.30142	9.45469	3.79241	7.03991	7.62634	0.637799	4.90229	4.61495	6.92299	4.1575	7.18469	0.602747
TCGA-DD-AAEA	5.2087	1.63614	1.37737	6.41691	4.70831	5.84786	3.0794	1.70013	4.33455	4.79758	2.00506	3.59666	3.68248	0.843136	4.90189	2.55883	2.09809	2.76644	4.43725	2.18394	1.49518	5.65656	28.3791	9.56931	3.01954	9.89942	4.54662	1.58794	4.23668	2.30277	1.652	7.38096	1.04111	1.7193	6.98171	1.64158	2.67267	6.59138	2.06555	4.99274	5.54762	2.73943	7.01656	4.25628	12.043	3.20633	2.84312	2.42042	0.420597
TCGA-DD-AAEB	1.84001	3.49802	4.3384	1.95407	3.62968	4.26035	1.82996	1.55139	1.23142	0.593135	1.45114	0.828669	4.46206	1.93211	3.62216	2.74425	2.24249	2.51817	2.22593	2.46513	1.1115	2.89217	24.3502	8.93249	1.48149	9.08933	5.16336	0.796196	3.71028	3.20681	0.55268	4.4834	3.50443	0.636484	6.00812	4.73898	0.708113	5.77421	7.66584	0.68823	3.60294	7.30147	1.73844	6.01831	6.9199	0.848964	3.85722	2.44819	0.674625
TCGA-DD-AAED	5.50509	4.41168	8.32285	3.36455	2.85186	3.6475	4.92171	2.24507	8.528	3.95024	2.39669	4.21591	3.39943	2.18549	4.7019	5.39516	0.593223	2.03523	7.02184	0.532221	3.65459	6.86811	21.0228	9.63627	3.91898	12.3411	4.44074	2.23305	6.40896	1.81489	2.86638	7.24546	1.37922	3.29126	7.90914	1.73685	4.26896	6.29928	0.880347	3.40652	4.7218	2.41158	5.11205	3.06005	1.76397	3.60368	3.20434	5.5272	0.329151
TCGA-DD-AAEE	8.5793	2.14684	6.61046	7.32557	2.32584	7.28267	5.19593	1.89621	7.50153	3.11926	2.99251	4.44171	2.58031	1.39512	1.19342	5.12289	2.9763	4.32268	4.36543	1.91266	1.32569	7.71118	24.3557	12.371	3.9977	8.89714	4.96468	2.12253	3.96321	1.97293	3.59108	6.32458	1.04178	5.5777	8.02646	1.58144	5.31434	8.32981	3.81451	5.05597	4.89444	2.75903	7.36202	3.10444	5.10297	6.32936	5.25288	5.07357	0.399018
TCGA-DD-AAEG	6.21341	4.97892	2.55098	3.16174	5.80352	5.78563	2.29027	0.995804	2.23477	6.63648	1.63555	5.05006	2.45017	0.854435	5.90282	3.83744	1.55596	5.54127	2.2287	1.26047	1.8832	8.31406	24.1518	8.35053	4.16815	10.2905	3.74144	2.0033	4.47241	1.7801	2.96731	5.82781	1.48264	2.75386	5.71037	1.87382	3.70307	7.4922	2.60136	4.85928	3.93272	6.23882	2.69526	2.91972	3.35161	5.387	5.60131	10.8903	0.369284
TCGA-DD-AAEH	6.80643	2.54135	8.06483	3.73622	1.58472	3.72145	6.305	3.17246	3.34832	4.12569	2.47366	1.49761	4.45986	1.13974	1.75311	5.68888	1.56209	1.7806	5.08652	0.481684	3.53662	5.52968	29.2591	10.113	3.84698	9.34355	4.82952	2.62803	3.52899	2.07503	1.8023	6.26616	2.89216	4.15703	7.71613	7.49315	7.50452	6.73506	8.51458	5.64257	3.32764	8.21501	8.76551	5.81683	5.78369	4.90028	3.2481	5.06458	0.431123
TCGA-DD-AAEI	5.71769	3.47991	3.00321	3.60165	2.68878	1.32484	2.84873	2.01621	5.42717	6.09978	2.00257	1.3996	2.75463	1.4502	1.78168	2.82863	3.19848	1.68348	4.65731	0.648721	1.66685	4.43457	17.1045	10.7304	2.95109	9.72443	5.11214	1.59994	4.7431	2.23199	1.84012	6.17429	1.26694	4.79629	11.6586	3.06289	3.74757	5.4161	1.29186	6.82943	8.24408	3.30008	7.54992	3.0508	2.6139	7.18908	7.35355	3.9655	0.458454
TCGA-DD-AAEK	3.25741	3.35967	2.2547	3.67555	3.03601	5.52841	4.27739	4.04368	5.51434	6.2216	0.646815	6.68519	4.82879	1.77603	4.35956	2.47808	2.83936	3.01776	2.14491	0.697698	5.23445	4.62035	18.9244	9.35691	2.7888	10.6615	4.82228	1.57028	4.56886	2.42298	0.977818	3.863	1.82021	1.46555	5.52534	2.15594	1.83781	3.92793	3.06454	4.60125	5.50821	4.41564	2.08744	2.97244	3.03436	6.02843	2.92171	3.65434	0.460658
TCGA-DD-AAVP	5.60824	1.86627	4.27369	6.38503	2.40243	5.7254	2.92546	1.67312	1.9648	1.56831	0.721346	3.34914	3.72237	1.50788	3.04942	2.90207	0.0410308	11.0439	1.29795	0.653638	3.16313	7.73967	30.1431	10.6009	4.53768	12.6049	5.34011	2.94053	5.80705	2.93499	3.59464	9.81945	2.30998	5.3877	8.88318	2.75126	5.20435	6.73775	5.91574	10.2856	6.52538	3.77175	7.9004	3.14984	5.1752	3.68002	3.44377	6.07705	0.337699
TCGA-DD-AAVQ	2.30658	4.27914	7.51489	3.98646	1.89118	4.47658	5.13439	0.964889	5.22546	3.53803	2.33317	3.51076	5.12725	0.862945	1.66453	2.67586	0.248926	2.66236	4.77886	1.01807	0.623897	7.61832	28.2871	12.1082	3.77716	14.258	6.08454	1.93713	7.07587	3.26173	1.7288	7.29575	3.15473	2.7162	11.8698	4.55516	3.77831	5.93322	8.15315	5.69511	5.85675	10.1072	6.8657	4.13387	8.42152	3.76106	3.22572	5.92756	0.431683
TCGA-DD-AAVR	5.61224	0.326282	3.85828	10.5763	0.57607	2.05612	3.99867	0.126655	2.3472	2.64026	0.00900344	5.16655	4.71931	0.471925	1.67084	1.40117	0.0710123	1.71556	2.26616	0.0629205	1.30864	11.0243	34.6291	16.5209	6.36428	14.9309	8.75569	3.82816	6.49675	3.15653	2.9149	11.4008	2.8608	6.35541	10.8967	4.59248	7.70727	6.78698	7.65363	6.51221	6.21254	5.87667	6.02941	4.10317	5.51349	8.86808	2.676	8.70599	0.350461
TCGA-DD-AAVS	4.68766	3.09088	6.70053	5.45205	1.24022	2.82186	5.23938	3.85455	5.6697	5.49937	1.38201	5.47664	7.07086	1.7105	2.52153	2.12436	1.82957	5.08863	0.861568	2.07534	1.82749	10.9096	21.7868	8.45832	6.41144	13.4731	5.33089	4.80615	7.59514	4.34716	5.05108	7.51047	2.06638	9.70021	9.96672	4.17116	6.24748	6.60653	10.6911	6.78445	5.95582	6.85	6.60297	4.60984	5.48945	8.81345	3.18613	5.20871	0.247181
TCGA-DD-AAVU	6.63688	1.62488	5.26349	6.31274	1.16249	4.44397	2.03297	3.7638	0.686495	2.70322	0.702804	4.82181	3.20385	0.530852	4.52513	4.79497	0.267017	1.09382	2.24247	0	1.62523	7.9545	25.6024	11.6169	3.54939	12.9736	4.89083	2.03536	6.30352	2.43913	2.96646	8.86843	2.65912	4.37834	12.1797	5.17071	4.43741	9.68154	6.57904	8.67418	4.83977	7.21964	3.19657	5.75868	7.42758	4.25956	3.96125	5.7853	0.40143
TCGA-DD-AAVV	5.63157	1.72212	3.85787	5.39421	1.7751	6.8083	7.24633	2.37927	4.92938	2.68178	0.863584	3.11231	4.04994	2.79882	4.31514	0.964304	0.68579	4.78986	2.63057	0.025401	3.20666	6.90581	27.281	8.7366	3.51834	12.7354	4.33574	2.1312	5.52528	2.04454	1.8936	6.41391	2.77128	3.81294	8.26463	2.29297	4.02615	7.37681	7.19276	6.54286	1.78733	3.73442	5.96119	7.35957	1.41812	6.3507	5.01982	6.73337	0.354714
TCGA-DD-AAVW	8.19073	0.702197	4.84005	4.39338	1.40342	3.9174	6.98941	0.178569	2.94889	3.55062	1.16911	4.03956	4.13012	0.357436	1.10248	8.64178	0.806321	4.34183	2.09385	0.140327	1.23816	7.78489	20.8022	11.7503	4.62098	7.12966	5.03263	2.1692	2.57847	2.19915	1.73076	4.09607	1.40351	2.67271	5.31124	1.81398	1.81746	1.45488	1.47838	6.69747	2.90429	2.14073	6.5037	0.878939	3.0148	4.13077	0.938284	2.85724	0.24971
TCGA-DD-AAVX	8.52171	1.98707	8.51493	1.77183	4.7107	8.34356	8.77778	1.73562	5.26217	10.4521	3.71776	5.22122	4.81458	2.46828	4.83841	4.46716	0.842101	3.94822	5.79168	0.0815409	4.27225	7.7161	31.8268	9.11257	3.65874	11.5898	4.0564	1.94865	4.80214	1.73536	1.57759	6.35886	1.38926	2.13659	12.5823	1.23399	4.57546	4.74475	2.62637	3.28989	3.88887	2.31941	8.01274	3.56581	4.5582	7.50138	4.08288	2.01521	0.300899
TCGA-DD-AAVY	7.15542	1.90116	8.72091	5.84767	2.32018	5.0135	3.77929	2.56389	5.66361	3.06543	1.12597	3.24756	0.353999	1.07488	0.758989	0.557417	0.526024	7.30534	0.0671292	0.189762	2.62831	9.10235	22.8982	8.84015	7.25983	15.8959	6.291	7.0646	9.36617	4.44129	7.1466	6.83259	3.24047	6.93823	10.8077	3.0548	6.95203	8.52538	5.31715	9.53403	6.31757	5.77844	12.1012	4.61419	4.81429	13.0748	4.52936	6.85446	0.203048
TCGA-DD-AAVZ	7.06992	2.14849	6.08687	3.52247	2.19948	6.68315	4.68468	0.756387	4.29856	1.68086	1.1694	2.27394	6.50494	1.30405	5.34523	3.62212	0.175892	3.59711	3.37991	0	1.91553	9.63336	27.9896	10.6662	5.61076	14.909	5.89834	4.02066	5.79152	2.75184	3.96643	13.3036	1.95013	8.97536	9.02384	4.4286	7.28821	4.62909	5.51108	7.28886	6.64	4.23358	8.06636	4.75296	4.20435	5.4714	2.84076	2.49818	0.266453
TCGA-DD-AAW0	6.83494	1.12925	2.28088	8.6988	1.0247	3.11334	6.54484	1.18751	2.54584	1.65641	0.246935	3.28387	5.57969	0.686726	3.19117	2.69522	0.242201	1.96548	4.30756	1.19914	1.54695	10.302	18.7517	10.4292	5.69351	7.75412	4.64951	3.29586	4.74654	1.96628	3.89567	5.35231	1.83143	2.14305	5.00122	1.29697	5.75858	2.75623	2.07453	6.33268	2.42019	3.09151	4.40388	1.16773	5.21808	6.20179	1.86554	4.39575	0.131863
TCGA-DD-AAW1	3.42856	3.39674	4.60953	5.57001	2.59755	4.77723	6.76147	2.33987	4.47401	1.76532	1.01885	1.59709	9.07587	1.45548	1.82972	1.47828	4.18817	2.65274	3.30421	1.00175	2.27043	7.99122	21.3481	16.3059	3.57586	10.6874	6.34828	1.37459	5.29402	3.15721	1.26615	7.90339	2.97078	1.99933	12.8773	2.28702	2.83306	8.59485	2.52462	3.38078	5.76999	3.97843	6.21181	3.72475	4.9919	5.73265	4.97117	3.97354	0.41754
TCGA-DD-AAW2	5.95214	3.76983	2.25073	3.18967	1.54903	4.41338	4.2455	0.577684	2.75815	3.93807	0.892535	2.1846	1.99784	0.877869	1.01942	7.20953	0.294679	0.433174	5.41228	0.0550237	3.02265	5.13326	31.4262	10.3941	2.95939	11.0892	5.13034	1.57987	5.09091	2.78991	1.63165	10.3911	3.11847	2.73156	7.34433	8.33497	4.5039	5.4205	6.19366	5.74863	6.19861	6.34117	4.78179	7.53327	5.8261	6.40226	3.90837	9.43122	0.484598
TCGA-DD-AAW3	4.05009	1.26774	6.17917	7.80984	1.56834	9.17794	2.51879	2.21583	5.18937	10.6901	2.10911	5.77217	2.49931	3.69318	0.718255	7.41533	1.26816	0.750222	3.62163	1.47692	2.71925	5.63698	20.5313	9.25102	3.9874	13.5222	6.13066	4.66253	8.96795	4.16451	3.83728	5.49943	2.59538	2.74476	7.89474	4.14279	6.19179	9.62648	5.66823	5.7295	5.21978	7.02185	7.81554	6.91915	12.9642	9.24853	4.09173	6.78963	0.4158
TCGA-ED-A459	1.76603	5.70448	2.13551	2.04551	3.56292	2.49084	2.89407	4.55234	5.51868	5.30047	2.06221	3.44254	0.465336	3.33656	3.11209	10.8981	3.04382	2.55347	1.45964	0.973834	1.96323	3.72005	18.3587	9.81068	1.99995	7.18159	4.73006	1.01228	2.82736	2.29371	0.851767	3.05897	4.78412	0.87453	3.1662	3.38384	1.33761	4.18264	3.07994	2.74802	4.87794	1.49123	1.619	3.42686	2.50644	2.31061	4.50057	0.833529	0.609657
TCGA-ED-A4XI	2.79104	1.73711	6.39425	6.06935	1.4667	4.29973	2.71213	0.791957	1.72707	2.15998	1.86132	7.16345	3.24846	1.41188	3.65663	5.06364	1.8184	1.65277	2.72233	1.5447	3.84966	6.20087	25.3209	9.42587	3.51311	10.8326	4.75379	1.74652	4.10691	2.31575	1.77854	3.76293	2.86762	2.75296	5.07112	2.36874	3.6759	4.60801	3.20426	3.91447	3.1768	8.67543	7.16752	2.56745	7.12003	1.32538	3.026	6.14205	0.462827
TCGA-ED-A5KG	6.34764	4.13654	6.34151	4.50729	3.03643	3.63727	3.22927	3.68483	2.92698	4.28402	0.866087	2.75034	6.27918	2.10179	0.403798	1.9805	1.74394	0.984706	1.39008	0.435829	1.43908	12.3483	14.7348	23.1209	4.86413	8.91194	8.31616	1.93158	7.92768	3.73536	2.91447	9.14372	2.30357	5.70841	9.64355	4.53435	5.69976	3.34639	4.42528	6.88201	11.5616	10.5389	5.02563	2.13671	5.5913	3.63201	3.03617	7.84155	0.392435
TCGA-ED-A627	2.93798	3.12964	8.50292	4.15135	2.85011	3.84133	2.60796	1.75791	7.80812	0.869353	0.966013	2.60015	3.03785	1.10321	2.95636	2.01124	0.798657	0.413385	1.54365	0.884596	1.21948	10.3351	22.9139	9.56567	7.85524	12.8666	7.32328	5.6708	7.72424	4.42419	5.6549	4.68815	3.48374	7.80161	8.53776	8.39798	11.7427	5.77632	5.4888	10.0095	6.58102	2.75953	5.15653	5.00363	4.77235	6.96158	3.2468	6.58989	0.200091
TCGA-ED-A66X	4.08466	4.21041	5.3394	5.48937	4.83074	6.03531	3.69534	2.48842	6.13631	6.50366	2.34725	6.27648	4.20374	3.79439	2.71568	5.50027	0.656948	1.41396	6.09815	3.1035	3.43821	7.25064	25.1769	9.20346	3.8079	8.98224	4.73847	1.85976	3.48306	2.37856	1.555	3.99198	2.28346	3.1458	4.78436	3.26442	3.70348	4.02007	3.65434	3.69375	3.39455	6.929	1.84614	4.74186	3.756	9.39228	3.29338	4.35226	0.422993
TCGA-ED-A66Y	7.397	4.39191	3.81361	4.65231	2.31156	3.22015	4.68061	3.61138	4.13574	3.68808	1.91647	4.75779	2.2419	0.827437	2.53321	1.90865	2.15141	2.2722	4.62261	0.748866	1.97187	8.25041	19.8353	13.0341	4.11192	13.0815	8.27202	1.99766	4.84725	4.3063	1.34651	4.90845	4.80695	3.25587	7.34889	6.96992	3.54786	8.6125	8.91194	7.6688	2.12194	7.74932	6.82026	6.6377	4.33416	6.1242	4.37243	6.03706	0.327152
TCGA-ED-A7PX	1.20085	1.15358	2.40892	0.680222	1.06249	1.53223	0.722935	1.21903	4.62135	0.432345	1.08662	2.73318	1.36123	1.26645	2.8589	1.11255	0.935437	3.98126	1.16607	1.16727	2.19425	7.73545	5.8117	3.46979	3.57353	1.87746	1.58682	1.81405	0.618829	1.15102	1.66583	0.652589	1.16928	1.77298	0.720605	1.09374	0.95915	0.849133	1.43922	1.55778	1.12195	1.94719	0.612017	0.997885	1.61611	1.34767	1.13969	2.03848	0.410633
TCGA-ED-A7PY	5.12267	3.67197	9.39401	3.45365	3.76512	3.9715	2.62746	3.20826	3.09455	3.31057	1.44048	4.19369	6.21949	2.55193	5.986	3.4356	1.71286	1.12589	3.05815	3.11059	0.979993	9.56099	30.3828	7.73707	4.35466	13.2156	4.19602	1.8509	3.46035	1.99223	1.59189	2.02305	3.27831	3.23314	4.02826	3.84036	1.86355	5.27489	4.25698	2.28242	3.41567	5.56609	4.17725	2.19044	1.55581	5.89341	3.93369	5.50091	0.363574
TCGA-ED-A7PZ	1.86285	4.77802	2.38375	2.06454	2.73614	2.59324	0.916759	0.906691	1.97805	3.26829	1.60807	1.62898	0.900882	1.48805	2.46597	1.30007	1.04437	2.80584	3.58261	0.778312	2.75871	4.89856	11.554	5.02435	2.1978	4.43776	2.08916	1.66097	1.99697	1.15521	1.76184	0.92272	1.08103	1.46495	2.63261	0.879213	1.15188	1.4302	1.08495	2.07669	1.39071	1.47962	1.36098	1.66147	2.86392	1.78252	1.43131	1.78165	0.496693
TCGA-ED-A7XO	0	4.32598	2.69307	0	2.55423	1.38877	0	1.87222	1.42095	0	1.77537	1.42073	0	2.06424	1.21741	0	2.42388	0.855423	0	0.980943	1.04788	48.2613	11.075	4.67961	3.69596	4.36914	2.29262	2.11859	0.777929	1.27252	2.48362	0.489871	0.93661	3.04165	1.01857	1.53023	0.398913	1.29992	1.48439	0	1.5291	1.97048	0	2.66827	1.46294	0	2.27754	1.07808	0
TCGA-ED-A7XP	1.57235	1.7085	2.53045	0.292014	1.64763	0.989291	0.781139	1.87727	3.49086	1.6638	1.45048	1.69992	0.338045	1.16008	1.86294	0	1.3224	2.16354	0.296699	1.67488	1.1836	67.3508	9.02996	7.93509	7.21431	3.54736	4.20841	2.2553	1.42683	2.46167	0.559667	1.276	1.94881	0.567653	0.714398	1.65771	0.993057	0.87003	1.46431	0.724532	1.20299	1.71719	3.08052	1.42832	1.64405	1.12877	1.86669	1.47177	0
TCGA-ED-A82E	0	1.68226	2.48592	0	2.01941	3.34568	0	1.65872	4.47858	0	0.918314	3.8392	0	1.02961	2.791	0	2.48279	0.288184	0	1.69584	4.65102	87.6335	13.3203	14.6329	5.51714	5.26625	7.07303	3.11722	1.63936	3.24013	0.760094	1.38637	2.40132	2.86917	0.786693	3.84705	0.102895	0.698431	4.15847	0	1.00711	3.64395	0	0.7103	5.18112	0	0.662906	4.98154	0
TCGA-ED-A8O5	3.30197	1.65198	2.09112	1.99506	2.03303	2.27775	2.0011	1.87474	4.35328	5.02083	3.26748	0.582309	3.12536	2.86824	2.99153	0	2.07959	4.0033	0.714044	2.81437	1.98621	35.7058	12.8018	9.78944	11.5764	6.4136	5.90873	4.74833	2.82411	3.73427	2.72288	2.17596	3.11421	4.0593	0.651006	3.85242	5.56075	0.95621	2.6329	4.1295	1.19103	3.46919	1.73897	0.741592	2.39394	0.526505	2.03478	2.39216	0.0174237
TCGA-ED-A8O6	3.9669	2.16343	6.16523	5.96851	2.52775	5.69226	6.0254	4.88705	7.3767	3.64381	2.77249	3.49396	3.29531	2.4218	2.32762	3.80327	3.34241	2.4128	1.50128	2.18443	3.14898	5.99432	15.8382	8.43216	3.29074	10.3791	5.03487	1.85957	3.98359	2.9371	1.47128	3.32098	1.84016	1.70513	4.13949	1.35804	2.27446	5.18473	5.42432	2.45062	3.10222	3.66991	2.42333	3.88741	6.28755	1.69784	4.61385	3.10117	0.425749
TCGA-ED-A97K	0	1.51318	1.63566	1.20078	1.78834	1.88693	0	2.43889	1.30202	0	2.20854	4.36783	0	2.62948	2.33051	0	2.11679	6.00732	0	1.44794	2.1346	42.2831	5.37771	7.68552	10.9514	1.67113	3.4045	1.82126	0.725934	1.7126	3.46932	0.93662	1.51462	0.96021	1.0463	1.81351	4.13215	0.858186	1.28856	0.879512	0.8255	1.13054	0.504114	1.05468	2.8222	0	0.92795	1.74652	0
TCGA-EP-A12J	5.67153	3.7084	7.88924	6.276	2.98027	5.02295	5.63494	4.10199	7.43615	4.10983	2.9329	5.35991	3.91868	2.89875	2.3068	4.39203	2.51936	2.4229	2.56267	2.04387	1.78198	5.04043	15.1431	11.7001	3.47188	10.4383	6.31774	2.12256	4.63129	2.44584	1.50243	4.8617	1.73524	2.64874	6.05512	3.02098	3.61909	6.63365	5.30829	4.0443	6.83097	7.07029	4.21553	6.16283	6.71032	4.59612	7.74988	3.68423	0.476152
TCGA-EP-A26S	2.39994	5.55351	5.49344	5.59414	3.00572	4.29155	7.47079	1.23956	2.9766	3.60162	1.68231	3.30499	1.87072	0.864267	2.33419	2.35764	1.78613	9.61921	1.7573	2.41991	0.50033	8.49324	16.5173	14.8998	4.32718	8.51885	6.78486	2.42677	4.18341	2.65831	4.35074	6.94434	1.77178	5.23708	10.8183	7.03506	6.73868	8.12597	7.96452	5.21705	7.20243	3.40413	4.70435	4.44472	5.35853	4.67704	4.84402	4.26548	0.317614
TCGA-EP-A2KA	3.75634	2.29734	4.87238	4.76745	2.63113	3.04383	5.69073	2.63816	3.16715	3.04252	1.03501	8.16866	2.25587	1.6634	2.68598	3.7661	2.54278	2.78837	1.29768	3.64323	3.23956	6.94251	7.61345	12.7678	2.85828	3.65925	5.78988	1.61563	1.76719	2.65876	1.1058	1.46165	2.52068	1.04808	1.29789	1.62794	2.35414	1.3987	2.5442	2.65695	2.90941	4.05067	0.768299	2.85414	8.16564	5.79134	2.53465	3.41633	0.486808
TCGA-EP-A2KB	5.84471	3.11116	6.04127	4.01468	3.36454	5.12673	3.55077	5.51853	2.75843	10.946	3.87017	4.20236	2.42757	3.0884	0.738034	3.27549	2.73818	1.96177	2.60709	3.83713	1.79302	8.23993	13.1588	15.1359	4.26126	7.76305	8.73659	2.51236	3.4702	3.87063	2.98423	4.41064	2.10563	4.10741	5.36573	4.42342	2.71725	7.48451	6.20854	6.56099	4.5637	4.74787	5.94392	6.16969	3.73	5.12519	2.42036	6.13525	0.339804
TCGA-EP-A2KC	4.60157	6.19954	2.61092	6.45463	5.75224	3.21592	3.04928	1.93618	5.33568	3.27355	3.37787	1.76144	7.00154	3.11196	1.57363	1.32843	1.52304	0.655364	2.80005	0.281922	2.65676	5.88386	10.6041	9.04926	3.50106	8.38828	4.82107	2.60523	4.11186	2.65576	2.32529	3.48208	1.66724	2.44299	3.60829	3.98408	5.33899	6.38694	3.05967	3.43917	5.94027	3.04519	6.90029	8.37501	3.56581	2.84093	5.91098	1.63022	0.375957
TCGA-EP-A3JL	7.92834	7.79	4.6077	6.97261	3.0718	3.12245	4.02875	2.10818	3.75017	3.09492	1.7495	3.38347	3.33929	2.74299	1.99919	2.51986	1.36314	3.12635	1.1897	1.27438	1.04297	8.56675	11.6392	16.856	5.28748	7.32373	8.52166	3.32417	4.19025	2.74582	2.81401	3.7397	1.67438	5.42919	7.99054	3.89838	9.37744	9.16963	8.89636	7.27697	7.95669	9.93049	6.29942	9.19432	6.40161	7.38335	6.57819	8.01705	0.323147
TCGA-EP-A3RK	10.8297	8.22131	4.14558	4.54385	5.48663	1.99156	3.96085	4.83944	3.35499	3.42003	4.46696	2.32697	4.10437	3.44989	1.93455	3.10622	1.51953	3.4979	4.26839	5.02188	1.50149	7.18563	8.65325	18.3159	3.76117	4.42089	6.40286	2.10564	1.62407	3.05931	1.95471	2.24097	4.99625	2.86747	3.76432	6.34116	2.93206	6.35353	5.35065	5.03338	6.82331	3.49631	4.30887	5.50974	5.21836	7.51776	4.35272	12.5948	0.462716
TCGA-FV-A23B	5.44585	6.12069	9.64252	12.8603	3.8318	3.84217	5.97469	2.546	3.67398	5.7777	4.98492	4.27128	2.45743	2.64235	1.51406	4.4229	2.26315	0.475621	2.00761	1.08678	1.90013	8.77225	13.6445	12.7974	4.3831	8.51313	5.96989	2.55876	3.77098	2.21572	3.2272	4.075	2.24086	3.18669	9.34191	2.95127	6.21891	7.98901	3.07441	7.67696	4.22239	5.68422	7.94378	8.2566	3.51989	4.62687	4.3021	1.66059	0.207918
TCGA-FV-A2QQ	5.42137	6.40461	3.32605	6.36869	6.06168	3.39611	2.11833	5.30349	2.4083	4.62016	4.72251	3.8577	5.19041	1.06763	2.90517	4.21967	4.47047	2.4333	1.58309	3.09216	2.89909	7.43488	9.22227	13.0782	4.0751	5.3935	5.10277	2.36381	1.86346	2.1083	1.8737	2.10285	1.39429	5.52233	1.64106	1.18752	2.77777	4.58171	2.66669	8.59648	3.12481	5.33053	5.61279	5.56496	2.56088	4.60275	5.9932	8.12362	0.35429
TCGA-FV-A2QR	4.04104	2.19517	9.11363	6.18201	5.73699	6.43803	1.68958	2.24821	4.22525	7.37144	6.90181	7.13052	2.62495	1.38462	2.56788	2.25876	1.12165	2.87329	7.98513	1.56194	0.617546	13.61	16.5965	9.41997	8.7069	9.78895	5.89574	5.08475	5.55403	3.60394	3.6326	3.70551	2.88145	3.57793	3.60478	1.34405	2.65907	9.70108	1.27631	6.80088	3.05965	4.53968	5.29903	5.24943	4.92433	2.64091	6.48533	3.59934	0.0841916
TCGA-FV-A3I0	4.10634	3.01818	6.89476	5.60474	2.01471	4.31184	5.64331	5.04627	5.20769	3.24625	4.89723	3.85186	1.88845	3.02159	2.91234	3.7454	3.46228	5.29106	3.7242	7.5632	3.09895	9.79108	9.54144	10.2034	4.98914	5.62512	5.97765	2.80744	2.69538	4.14216	2.49993	3.29323	2.79176	3.25914	3.95549	2.90481	4.44007	4.97685	4.40909	5.57179	3.4819	3.7462	10.0522	2.58508	2.92816	2.84133	6.88622	3.44536	0.176079
TCGA-FV-A3I1	2.93588	6.08999	3.94202	4.5926	4.10238	3.87746	6.28653	3.44236	2.38541	6.49675	2.1689	4.08124	2.85769	3.15514	1.06801	0.825335	2.9133	0.938853	4.09046	2.46372	0.991425	8.39434	9.10614	15.0459	3.98012	6.50554	7.53504	1.98182	2.75852	4.0889	1.93448	2.47729	3.59906	4.46364	4.67887	4.78556	5.35147	4.44465	9.2733	5.72336	3.13334	8.55932	3.13632	5.91591	7.01674	6.76848	3.70758	5.18271	0.346392
TCGA-FV-A3R2	4.2286	2.69844	3.19421	3.20036	3.72912	2.37189	6.45933	4.88018	2.6087	5.38137	1.12847	0.984548	3.44827	2.37106	0.620238	4.13134	3.35623	1.98529	7.0703	2.73329	6.42201	5.90995	15.0611	9.15287	2.91245	7.35391	3.42782	1.45937	2.75238	1.5702	1.3777	2.94506	0.949434	2.14991	3.88007	1.46732	2.37947	6.11848	1.99612	4.77769	5.60418	0.342908	2.81771	5.56437	0.30728	4.19256	3.22547	3.30863	0.334094
TCGA-FV-A3R3	6.41936	4.00702	7.35137	4.41875	2.97484	3.64544	5.4178	6.05186	3.40466	5.04972	6.49955	5.62166	7.12263	5.70093	2.51987	5.30759	2.88538	0.885456	3.74378	5.39069	2.88105	6.80272	11.2329	11.5806	3.78452	5.75149	5.95491	2.3337	2.24161	2.55948	1.7893	3.88737	2.09218	2.78529	4.3841	2.52286	5.34822	4.24256	2.67172	7.72164	3.78492	4.16436	4.72746	5.67002	6.17331	4.47963	4.09106	3.34969	0.285047
TCGA-FV-A495	6.7786	4.21502	6.36467	5.2714	4.02147	2.71702	5.65484	3.79435	4.6514	2.5358	1.8367	2.85132	1.26404	4.68988	3.77469	3.47334	2.13449	3.18189	8.61661	3.36361	2.4012	8.82566	16.4713	12.7412	3.72763	9.90988	5.37373	1.57976	4.03338	2.32402	2.22479	5.42614	1.91385	2.64181	6.627	3.06688	3.80726	6.09826	3.54577	4.35776	4.62748	1.96448	3.47722	3.30204	7.58698	3.70205	3.30477	1.51283	0.365666
TCGA-FV-A496	6.1989	4.45856	6.29274	8.69593	2.28852	2.92194	2.19914	2.3542	3.90009	3.12008	3.23193	2.89479	4.09618	1.48535	3.01847	4.10518	1.63212	1.78668	6.34206	1.33099	2.72089	7.52198	14.5358	14.1362	3.84348	12.7718	6.54872	2.18638	5.67924	3.07128	4.30553	6.76587	2.0206	4.26513	9.00304	2.87863	8.31895	5.39892	7.02113	4.02503	8.14564	9.96232	7.81634	3.1532	3.4344	6.94974	8.42543	1.15867	0.359542
TCGA-FV-A4ZP	6.55226	4.14014	5.3128	6.57794	2.47885	3.24864	8.32003	2.77882	0.942609	1.20011	2.35207	1.73329	4.16553	3.20895	2.23705	3.38308	3.17989	11.3238	1.5011	2.10435	1.44811	8.65413	15.5198	9.12093	5.28038	9.43154	6.16218	3.70202	5.31126	3.56834	3.31872	4.47564	2.13095	6.73734	6.76003	1.75967	4.35022	7.71109	2.32679	7.39632	7.5559	5.03664	7.93617	6.07853	3.59745	10.0652	5.19239	1.47862	0.203143
TCGA-FV-A4ZQ	5.05052	2.49636	0.444417	11.5642	4.85764	0.551237	2.72193	1.03948	1.83994	2.9552	1.37579	2.49038	3.39316	1.05568	1.99652	2.37609	0.963514	0.00591945	4.37955	0.778956	1.06782	10.0507	20.8773	12.3935	5.26609	10.411	5.47436	3.18463	6.28838	2.53638	4.42566	7.57755	1.52177	7.26905	6.82082	1.31592	5.21737	7.70884	1.77439	5.52209	11.6842	0.690099	8.64467	7.55195	1.13897	7.1272	3.82543	0.0236607	0.21593
TCGA-G3-A25S	3.98881	2.18494	7.41265	4.31557	3.15745	2.50841	2.81148	2.62873	5.34055	2.64981	2.83864	5.06814	4.00717	1.18375	8.89546	3.33805	1.97969	2.71766	1.4382	2.61167	2.39199	8.0322	25.6495	9.30085	4.07314	11.842	4.18896	1.81195	4.16783	1.91133	1.75681	4.03349	1.98462	2.85729	5.58713	5.38833	3.64483	8.22882	7.95953	7.38201	2.89564	8.22632	7.48215	4.03261	6.77565	5.26065	4.63121	3.44455	0.396631
TCGA-G3-A25T	5.51704	5.2507	5.90667	5.14162	2.18908	4.62332	4.82107	2.27451	5.96992	6.87519	3.00931	4.8324	3.09912	3.22067	0.369397	5.13587	0.922739	4.14921	3.01105	2.75018	0.937418	7.68984	15.7644	6.72577	3.92477	14.209	4.6259	1.82879	5.75882	3.61426	1.99946	3.53072	2.66708	2.75296	5.52848	5.92885	4.64453	5.1488	7.32228	5.70736	3.52642	6.80061	4.38176	2.37147	1.33354	3.99174	2.87284	4.74219	0.236892
TCGA-G3-A25U	6.16232	4.82297	7.52231	7.13061	3.13592	2.53506	3.05119	2.10373	2.56933	4.3624	2.43401	3.68108	4.06787	3.08233	3.35275	1.88345	4.89437	7.17923	4.4675	1.34057	2.5454	8.09096	21.5873	7.25804	3.51439	10.9603	3.5241	1.65921	4.66168	2.54604	1.82954	3.34257	2.0859	2.21842	3.26237	4.28808	3.57138	1.77619	5.26462	3.17108	2.5182	4.59276	6.47628	4.37996	8.02274	3.57206	2.77791	6.50783	0.358016
TCGA-G3-A25V	8.53686	4.61997	3.94507	2.487	3.64079	4.06553	4.12221	3.56865	3.81408	6.63077	3.92308	2.23163	3.90633	4.37359	4.31045	3.01656	1.0562	3.24306	3.39289	3.07836	5.50697	10.9727	26.2708	7.23347	4.91914	10.1626	3.60766	2.34172	3.72987	2.0829	2.69045	2.71439	1.71959	3.18329	4.76571	1.55286	4.27308	3.07656	3.78832	6.61273	4.49353	6.6794	3.76858	5.64663	5.50456	5.4515	4.65573	4.8391	0.216726
TCGA-G3-A25W	2.97945	5.14636	8.63946	3.50836	3.25416	2.20716	2.81478	2.62942	4.37152	6.22281	3.28089	5.05849	8.02759	3.35599	2.41342	2.24179	3.05604	11.0266	3.80363	5.74322	5.56705	5.27568	13.8542	5.39058	2.63958	8.62479	3.19776	1.93811	3.84491	2.11838	1.87868	2.72739	2.19528	2.32661	4.09693	1.30339	2.39904	3.13222	2.68818	3.32958	2.55086	2.33088	3.146	4.63893	3.945	2.92573	3.54544	7.17977	0.296028
TCGA-G3-A25X	4.70178	2.10758	3.24399	4.13074	2.93194	3.76438	4.26247	2.87827	0.572955	6.21934	1.54268	2.75506	2.74353	1.00457	1.09688	4.3866	1.75349	0.899016	2.59911	0.306874	1.02174	8.90343	29.928	8.2675	4.83776	14.2085	4.38431	2.51616	4.22113	1.77762	2.54425	4.05392	2.58194	3.97328	3.79743	2.16318	3.88311	5.9885	3.31215	6.02309	5.24109	8.2484	8.49762	4.7987	5.53581	5.18352	3.78106	2.22369	0.258597
TCGA-G3-A25Y	5.80061	3.91708	4.71443	4.35199	3.35127	4.09318	3.18149	3.2786	4.3504	7.81063	3.55948	1.50585	3.98823	1.37029	1.38001	0.942302	1.33813	3.48515	3.10375	2.24509	2.16532	8.38569	13.2872	10.5835	4.80472	10.6156	6.20606	3.49946	7.22539	4.42137	2.93167	5.84242	4.92022	4.52785	7.94572	3.50972	6.52576	8.12928	9.12855	5.04034	5.06215	2.08257	5.63002	6.39104	3.70684	8.5049	8.46526	5.76939	0.290298
TCGA-G3-A25Z	7.48308	4.89187	4.72304	5.16038	3.32973	3.93761	4.98009	2.50833	5.19485	4.90138	2.10078	6.15863	2.44529	3.11126	3.9206	2.07437	2.33101	4.59761	4.3745	2.72009	2.50374	8.02499	17.463	8.74965	3.94421	10.5343	4.71919	2.13735	4.26363	3.23684	2.61987	4.5516	2.40366	3.26344	5.88126	4.85382	6.42402	5.11563	5.40649	3.53851	6.31165	8.35015	5.0745	2.93968	9.439	2.38155	4.7848	4.89371	0.361161
TCGA-G3-A3CH	3.83191	5.58445	6.18419	5.93049	3.25046	3.72471	4.61707	2.60469	3.56791	7.85739	2.73603	5.06257	1.42709	3.65904	4.40978	2.49416	2.72232	0.67844	1.94215	2.62282	0.521829	8.56906	18.9921	8.95836	4.2731	10.5967	4.11451	2.19505	3.9398	2.00107	1.99014	4.41305	1.30458	3.60409	4.8843	2.67338	5.96146	5.37752	6.7488	2.86134	4.6971	5.20639	7.76874	2.64952	8.21214	2.6063	3.10171	2.87946	0.283638
TCGA-G3-A3CI	3.58656	6.46508	3.1545	5.86222	1.67699	2.20483	1.34668	2.88436	2.31555	1.19938	3.49319	2.26411	1.82741	1.31374	8.7145	3.73015	3.31869	6.92819	5.88398	0.8133	6.08119	6.99146	21.3638	6.83977	3.33724	8.19616	2.83497	1.706	2.91936	1.25168	1.53289	2.47511	1.37043	1.42213	3.56509	1.43424	2.08433	4.59741	1.12196	2.39139	3.59497	1.88482	3.65449	1.92486	2.98969	4.90194	3.32731	2.57425	0.337852
TCGA-G3-A3CJ	4.17914	4.87115	6.73037	3.34082	1.42218	5.30451	5.17812	2.8289	7.06892	4.45532	1.61721	4.31679	3.31031	1.69775	2.99214	4.42105	7.14058	12.8755	3.30941	1.16034	2.0186	7.57852	21.502	9.49308	3.64177	9.56472	4.3479	1.5627	4.31523	2.22382	1.52825	3.90622	1.83076	1.22893	4.74489	1.46945	3.75831	4.33449	1.66175	2.43405	6.01831	2.15608	5.96407	3.64583	2.27884	2.98169	3.05048	5.45436	0.345099
TCGA-G3-A3CK	2.02549	5.68115	3.86455	3.98476	0.601012	2.98584	1.0552	3.6318	9.17643	4.21356	1.03398	3.81996	1.24188	1.91673	2.03151	2.45868	2.69412	0.610808	2.17589	3.14839	1.06177	17.7609	18.243	15.6937	7.01426	9.6916	6.59828	2.6903	6.49251	2.48802	4.28423	6.72178	1.78103	9.0933	7.19479	3.13962	5.61917	6.56684	4.62012	6.9808	3.65088	4.52114	15.3748	5.17588	2.8233	4.87142	4.84679	5.19289	0.168533
TCGA-G3-A5SI	3.44462	4.08981	3.06512	2.56094	5.80798	3.85478	6.5183	3.58412	0.606468	5.66158	1.63399	4.93148	3.95857	3.99385	4.25563	6.7336	4.87099	1.56759	1.81605	0.415582	3.78088	8.66559	14.2142	14.4823	3.40843	7.47121	6.08865	1.56984	2.09266	3.78191	1.65206	3.01375	7.9586	2.58751	3.53152	9.10223	2.16747	4.827	9.79953	4.45047	2.59057	4.6325	4.77392	2.61003	3.63158	4.69422	3.6547	3.25859	0.377714
TCGA-G3-A5SJ	10.7556	5.37448	5.23717	3.91135	3.56741	3.11926	9.19814	3.99706	1.24915	3.90121	4.33923	3.11514	4.50553	3.50568	1.614	8.55015	1.57182	3.77921	1.81367	6.98436	1.7389	7.05429	7.00269	13.459	2.98653	4.44941	7.88666	1.34075	1.95142	4.09932	1.50062	1.21855	3.0928	3.47635	1.39107	6.41204	2.52936	1.07956	9.23769	3.9272	1.91216	4.04867	7.25361	3.86096	6.42962	3.53877	1.41298	3.6513	0.432667
TCGA-G3-A5SK	12.3158	4.40825	4.75606	4.64202	3.89198	4.74418	3.80393	4.27805	5.17422	4.85721	3.41632	3.58749	8.38584	3.11344	3.36159	5.44396	2.93037	0.221053	5.18724	2.11721	2.93668	9.51813	19.3442	9.75409	4.72325	8.08348	4.62366	2.08551	3.48657	2.45657	2.41012	3.37376	2.47341	2.33116	5.01854	2.69046	5.72883	3.49891	6.09381	3.80315	4.48771	2.86932	4.47479	5.59397	7.21066	1.2344	3.91865	5.52031	0.256922
TCGA-G3-A5SL	3.23865	2.57656	2.30658	1.89588	3.12664	4.90843	7.51169	2.57022	4.4394	3.18382	4.17407	4.65299	6.75166	3.0138	3.08941	2.4697	3.60136	3.02482	7.45662	3.01107	0.944245	6.85328	13.0661	12.5403	2.95074	7.86045	6.2391	1.65156	3.72171	4.14285	1.79623	4.60205	3.45225	2.73946	3.92809	1.96238	5.50986	4.90234	4.07712	3.19439	6.43552	7.59053	7.49374	3.42488	4.56015	5.5865	4.48095	5.89601	0.421467
TCGA-G3-A5SM	3.60161	3.09419	6.93997	8.97091	4.03703	1.20292	4.51369	3.92188	4.11788	3.43001	4.82098	6.32777	2.03769	2.04406	4.92453	2.77195	2.20967	1.93602	3.34944	1.0647	2.17876	14.5354	18.6968	10.0574	6.42033	8.92508	5.38177	3.41488	4.02422	3.17512	2.66335	3.94904	1.41322	2.77272	3.83471	3.84579	7.78564	5.63531	6.4155	12.1184	4.39215	7.6101	9.82367	4.78486	3.18231	8.75698	4.96128	9.26825	0.181708
TCGA-G3-A6UC	7.95459	3.27786	3.98888	3.98439	5.37874	2.17989	5.9978	2.83902	2.73814	5.77015	3.94278	2.74041	3.82858	1.79934	4.82454	7.05457	2.57223	7.61252	4.55288	3.17596	4.01225	7.21623	22.2134	8.07017	3.32282	10.2232	4.0027	1.63918	3.5278	2.34737	2.93089	2.75529	6.62064	2.33519	3.12128	6.24422	4.39409	2.80045	8.38111	5.51391	3.94176	8.21292	2.8288	3.29122	10.7311	6.02388	4.02637	1.9352	0.366584
TCGA-G3-A7M5	6.45923	3.5055	2.65782	2.49344	5.47557	3.96528	3.40467	1.07607	2.85535	5.44586	5.25321	1.33634	2.77578	2.73928	2.39348	10.5301	4.15725	2.36545	5.15911	3.68562	2.41251	8.01652	21.6834	8.06116	3.7693	10.4927	3.43193	1.83758	3.89406	1.41201	1.13847	3.88198	1.60172	1.17833	3.23793	1.99221	2.69006	5.09134	2.90937	2.96954	2.16893	5.87889	3.66861	4.79606	6.80062	6.4902	4.18981	5.77397	0.351401
TCGA-G3-A7M6	2.90153	3.67305	2.82461	5.99384	2.67959	4.6593	2.6031	3.53107	3.52664	7.12936	3.6709	3.37513	3.37579	0.968285	1.06474	6.10514	2.91137	1.08724	2.79345	2.42439	5.85013	10.8854	12.5714	11.8979	4.91253	8.06855	6.19437	2.05582	4.20497	3.11694	1.84934	6.04251	2.15448	2.62714	3.81728	6.01572	2.50591	3.32384	5.12825	2.90021	4.85229	6.06694	4.62451	3.80034	4.08611	3.60595	2.65462	4.32243	0.334291
TCGA-G3-A7M7	4.60576	3.05586	1.82222	3.08159	2.87506	3.33169	4.52802	1.76923	3.44346	5.17582	2.76699	3.06917	6.50008	4.04801	4.55873	4.78052	2.60518	3.55763	1.34979	1.23327	7.02236	8.86798	25.8688	6.79808	4.21666	9.26478	3.15739	2.28611	3.73135	1.48141	2.77853	3.09106	1.1428	4.15708	4.64472	1.85096	4.68447	5.33202	1.84095	6.02834	4.9548	5.37883	6.76619	3.11677	10.2957	3.97528	6.6707	6.65413	0.27515
TCGA-G3-A7M8	4.966	3.82306	2.39299	1.49793	2.39856	6.68387	8.46559	5.97324	5.10161	10.8308	3.81181	2.59179	7.04011	2.85761	9.79994	2.42878	3.70389	2.55755	4.59103	4.80393	6.21371	6.39886	19.6713	7.97748	3.14916	8.61163	4.2467	1.70369	3.73725	2.20528	1.65078	2.23131	2.32238	1.519	3.13306	2.64161	3.09098	3.5948	1.11744	1.17742	2.57151	7.63565	1.37087	2.34154	3.48163	6.01441	4.33713	2.8481	0.370537
TCGA-G3-AAUZ	2.12123	4.97017	6.88288	2.92773	3.65759	2.23986	5.78485	3.09358	1.43295	6.94084	4.92037	3.38229	3.47754	2.95235	2.96193	4.51014	2.22907	3.02272	0.930585	3.8379	2.62451	9.95689	17.1907	12.3662	3.96533	7.93239	4.8894	1.776	2.70664	2.22735	1.79919	3.45799	4.76536	2.92845	4.5542	4.96065	2.24896	2.35514	5.57178	4.61496	2.99099	10.1783	3.71431	2.69968	3.40594	4.4645	4.05364	4.27598	0.332825
TCGA-G3-AAV0	7.36374	3.63292	5.42633	5.93058	4.11303	1.98953	2.95014	3.36041	1.87213	3.93798	0.513603	8.95524	6.75494	0.839436	1.5901	2.80538	4.03135	4.0291	1.30724	0.342307	3.29749	10.8848	22.0143	11.7651	5.77161	10.5736	6.80745	2.72073	3.48199	3.47388	2.52696	7.41559	3.56014	6.41799	6.01802	4.25562	2.83003	6.99707	5.4829	4.18408	3.14713	4.45675	7.52356	9.30782	4.62849	7.06939	2.8305	2.66793	0.239926
TCGA-G3-AAV1	4.94202	3.68737	4.51596	4.89141	4.61431	1.38655	5.64163	7.4904	6.25742	3.04521	3.74617	3.39301	2.62891	3.11984	3.64618	0.564214	3.60077	5.46473	3.62403	2.93471	2.1678	6.85887	11.6181	9.23227	3.01039	7.19638	4.92793	1.66781	3.1828	3.08289	1.67093	2.57073	1.82911	1.90191	3.21821	2.47761	1.51802	3.02443	4.96212	3.67262	6.73286	6.05043	3.56071	4.1031	4.97869	4.02719	1.84646	1.92811	0.338363
TCGA-G3-AAV2	4.20937	7.50019	6.04878	3.87503	2.46075	5.54486	4.94346	4.53871	6.03475	2.42788	3.68391	2.63034	3.89355	1.21377	5.67753	3.44389	4.03607	3.87584	3.94617	3.57909	3.63264	5.72765	17.3458	7.50803	2.9764	7.13925	4.60565	1.71947	3.3003	2.57668	2.56435	2.90091	2.23245	4.08243	5.6207	2.24347	3.88189	5.46728	2.74325	2.60973	4.91272	1.24269	7.50425	4.41317	1.93169	5.16177	4.99215	4.25673	0.312686
TCGA-G3-AAV3	4.84171	6.09583	1.85991	4.88925	2.3772	6.33294	7.29549	3.67483	8.19321	5.02664	1.35757	3.44127	1.47529	2.50174	1.37601	2.83328	1.92109	2.45793	2.59851	2.64727	1.12703	9.95349	20.1466	9.09712	4.21905	8.40396	3.94552	2.31637	3.12537	2.21731	2.66931	2.67306	1.14193	4.45913	3.91552	3.44071	7.19244	3.96378	0.976969	4.23844	4.91599	4.51102	6.58409	3.80672	4.90107	4.29819	3.04778	5.69233	0.282104
TCGA-G3-AAV4	6.22212	4.79843	3.82339	4.84421	6.30576	7.14739	5.81121	1.71192	2.32936	6.24625	2.26364	5.61756	6.44845	4.64256	5.17601	3.17464	2.32702	1.76169	3.28785	1.76759	1.96172	5.03338	14.6458	7.74336	3.06632	11.3354	4.12324	1.58089	3.84275	2.75509	1.53773	2.55084	1.73564	2.39887	2.68687	4.54584	4.41991	5.7308	8.78015	5.37231	5.14232	9.28555	4.47609	2.82446	6.96311	7.53508	6.56039	6.43368	0.491836
TCGA-G3-AAV5	6.72018	5.27437	7.15208	8.76026	6.52483	2.98187	4.08946	2.80343	11.1916	4.03372	4.77352	3.08779	4.12088	4.18259	3.63317	4.74827	6.25356	0.999424	5.60594	2.56677	2.05943	6.55738	9.58013	11.539	3.44369	8.60156	5.96446	2.16125	3.1742	4.29521	2.74863	2.45387	3.22173	4.28369	4.03926	7.22215	5.535	2.29711	7.03733	4.99695	3.26607	3.02037	3.91363	7.7444	8.0678	7.1004	6.93729	6.52099	0.431905
TCGA-G3-AAV6	5.96661	2.92726	4.06046	5.32436	3.14487	4.84443	2.10122	3.61336	1.66446	3.55214	1.50128	0.495167	1.58887	2.22648	0.994594	1.88547	1.97311	3.14166	3.71361	2.84364	4.41963	8.31269	22.356	10.5206	3.95942	8.62335	5.46618	1.78929	3.0146	2.74182	1.3742	2.47557	7.7043	4.46899	4.92249	4.14014	5.14203	6.20523	11.238	4.77092	3.97677	8.21547	9.30217	7.22245	9.54466	6.49668	3.28295	3.06831	0.330377
TCGA-G3-AAV7	5.64013	5.01035	1.82578	2.93423	2.40165	2.46512	5.02532	2.73019	0.457214	3.1489	1.70238	5.40051	5.8521	3.02907	2.86353	2.84394	3.05374	3.26009	1.46056	2.38081	3.22019	9.93582	13.7124	12.4891	5.43554	8.47555	7.35508	3.0049	4.13724	3.33673	3.57273	6.10002	3.36348	4.2938	8.07438	7.21013	4.34875	6.01163	5.19172	7.09539	4.98711	5.39405	7.5044	5.45954	4.2309	5.89833	4.48107	5.19818	0.268549
TCGA-GJ-A3OU	4.46291	4.10133	5.29545	2.08769	2.11955	4.74107	6.15733	5.10228	4.5153	5.18859	4.05341	4.13255	2.93776	2.36828	1.66919	2.93213	1.1824	1.12191	2.68828	2.93607	1.30741	8.4684	22.9621	9.19212	3.91093	8.75539	3.73234	1.83823	3.99614	1.71663	1.32114	4.68133	1.33644	2.88619	5.34832	4.12354	3.05571	3.89477	7.45543	3.51775	3.56559	3.11831	5.63028	7.02287	8.59069	5.74792	2.0235	9.11269	0.356057
TCGA-GJ-A6C0	6.66357	8.09493	5.59147	4.25273	2.73501	4.96204	4.86831	2.36688	5.97993	5.77905	2.83901	7.56982	0.934369	2.43534	3.80579	0.716825	6.44266	1.76797	8.30534	1.77367	1.98553	6.03023	13.5908	8.55618	2.95485	5.47611	4.13513	1.52822	2.24226	2.31081	1.89924	2.98256	1.44078	3.69262	5.47534	1.23611	3.14837	5.4758	2.72496	3.10776	5.07207	2.38933	4.61835	4.9231	4.89846	2.91293	2.5146	4.26736	0.324761
TCGA-GJ-A9DB	4.03846	4.25228	2.50271	3.46741	4.15	4.61229	7.0274	4.93927	4.09919	4.56558	2.87298	0.974156	0.451595	2.21911	3.83528	1.45784	2.5461	2.997	4.79097	1.98617	2.37274	5.11128	13.0257	7.16548	2.40909	6.14622	3.56054	1.33612	2.18348	2.24456	1.5099	2.29007	2.14042	1.17857	2.60316	2.10685	1.73907	3.06923	2.89208	2.65658	3.22348	2.12969	2.05158	4.2532	3.87362	2.7697	2.44243	7.92974	0.377505
TCGA-HP-A5MZ	2.92793	2.93705	3.71192	4.50341	2.67318	2.96002	4.80376	2.2563	11.8917	5.97926	2.1585	4.07427	3.81027	4.07912	6.41654	3.17219	0.583617	7.69439	3.65859	1.98851	2.8876	5.02206	15.0383	9.72423	3.27656	17.2805	4.52708	1.86265	8.41463	2.65852	1.08097	6.799	1.60742	1.46752	7.6764	1.95339	2.53875	6.51179	1.0147	2.53454	7.38108	2.60237	4.19331	5.34988	8.05088	1.93059	4.91056	3.28386	0.538563
TCGA-HP-A5N0	5.84793	2.63592	1.9211	5.07566	1.94669	3.13902	4.69878	4.21622	3.02202	3.83516	2.19392	3.52386	3.61983	0.710892	7.08668	3.75405	4.06712	8.19012	3.88003	1.68532	6.00166	4.7153	10.7525	4.75163	4.62835	22.2029	5.07531	3.20317	8.63203	3.58805	2.58678	3.47993	2.02808	3.42918	4.37184	0.933857	4.06378	5.29951	1.97636	4.38515	5.31063	1.81643	5.36928	3.08272	3.6976	3.2845	1.53091	2.88648	0.338887
TCGA-K7-A5RF	7.51665	0.906199	0.570615	1.91425	3.07731	0.0875837	9.8724	3.522	0.182176	0.700468	0	0.0530438	0	0.342643	0.234171	0	0.0808525	0.38027	2.32977	0	0.147847	9.87584	12.45	5.35634	7.98519	11.2697	2.3933	7.85952	8.47643	1.6421	8.03564	6.71745	1.12203	9.05901	10.8593	0.3087	8.71266	8.23735	0.284399	3.11413	13.1062	0.632988	8.51732	7.43618	1.78196	7.98723	3.06181	0.225407	0.0235616
TCGA-K7-A5RG	7.7999	1.49588	5.66264	3.23099	1.91077	5.37321	5.31259	3.15267	2.26058	2.91914	1.5551	1.42316	4.52165	2.28325	3.90476	2.01287	1.35678	3.05953	3.21148	0.724727	1.50789	11.5549	19.9741	8.03842	6.14473	9.12812	4.17972	4.03285	4.09666	2.72712	2.96416	3.99449	1.90418	5.48468	2.91798	1.59353	5.92777	4.51696	0.934779	4.77884	3.4826	5.48955	3.03373	1.11599	4.50675	7.9003	1.674	1.5427	0.131606
TCGA-K7-A6G5	5.10422	5.34074	3.58797	4.60728	2.65239	5.5839	3.31118	2.88437	8.48587	3.20986	2.45735	3.66582	6.14173	1.76922	6.99553	3.72399	1.67333	1.85437	4.43125	0.679384	3.45214	9.86141	23.1845	10.5173	5.09312	12.6909	5.15603	2.34289	6.03564	2.54812	1.3782	8.75015	1.6138	2.43972	8.77982	1.04754	2.07014	5.15064	1.85034	5.80979	3.68219	1.82362	9.27967	4.18235	3.70673	6.97763	3.85264	5.74589	0.245513
TCGA-K7-AAU7	4.47232	2.91318	1.79639	4.97804	3.18633	1.97935	5.95957	1.55065	1.4463	5.47322	2.06404	3.4325	3.4496	1.77685	4.65474	2.22232	2.37094	4.4705	6.70943	2.1207	3.62136	4.70256	13.1895	8.75807	2.52034	7.65997	4.7566	2.18347	4.38314	3.49317	2.10349	4.29032	2.30863	1.76993	3.91512	1.97023	2.6216	5.12244	1.31102	3.18293	4.97753	2.64362	2.74388	3.52404	2.42536	4.09094	6.85524	1.05666	0.286202
TCGA-LG-A6GG	2.67627	4.38724	6.65935	5.60318	3.16208	4.29766	3.09258	4.045	5.81203	1.98484	2.53319	5.63538	4.03254	0.821973	3.0242	1.01469	0.896878	4.18785	8.65396	0.780912	1.94347	14.21	16.7873	8.48373	5.96663	8.6916	4.26725	3.54889	3.79507	2.12532	4.07371	4.03306	3.74682	6.80229	6.62618	1.96236	8.46237	5.34529	2.74329	9.1787	4.99398	6.33381	6.82844	2.22848	1.8205	5.47689	2.74743	6.29709	0.10424
TCGA-LG-A9QC	3.29441	4.5625	6.60734	8.98473	4.37496	5.18591	5.98259	5.29451	2.15213	4.31105	3.37163	3.37577	3.02903	2.68342	2.36157	0.461522	4.20035	3.45335	0	2.01609	3.43225	13.4343	21.3537	6.04832	5.73188	6.92125	2.95071	3.32134	2.66738	1.47112	5.4417	2.13129	1.61995	7.58987	1.20078	6.35182	14.6921	3.42492	12.0526	10.1015	4.7971	7.7366	8.3406	4.47847	8.49092	3.85837	5.95954	7.46437	0.140783
TCGA-LG-A9QD	10.3682	5.85297	2.66072	2.79537	2.8016	5.44261	3.80047	3.33087	3.62087	2.87752	3.32822	5.20494	3.40345	1.55237	10.1957	0.0762347	3.40179	4.46137	0	1.4316	5.72729	12.687	14.4071	9.35881	7.08449	8.40374	3.62224	5.15126	5.4736	1.58444	6.77031	5.3501	1.34805	7.62938	6.02646	1.97632	10.3204	5.03729	2.24025	10.4953	6.00042	4.45386	5.63443	4.31247	5.5881	9.26941	9.05643	2.56989	0.117416
TCGA-MI-A75C	8.86405	5.68643	2.17244	5.88161	7.33895	3.08761	4.7822	4.84299	2.70448	3.22013	4.56514	4.10077	2.0398	3.60917	3.179	2.82376	5.65551	2.97739	5.50019	6.46573	3.1161	5.45228	6.62639	19.1576	2.90514	3.22538	9.56615	1.77233	1.44099	4.07357	1.65703	1.42031	2.22496	3.2359	1.96135	3.70453	3.07314	3.09351	3.58611	6.0739	6.78586	5.16491	5.00796	6.55553	3.32665	4.41741	2.40353	4.26398	0.305441
TCGA-MI-A75E	5.21167	2.74731	7.36928	6.7359	4.64901	6.36547	4.18301	2.64419	4.77292	2.81975	4.14284	2.16541	4.74275	3.10713	3.36235	6.03411	1.6087	3.02985	2.41242	2.46126	2.58606	12.8071	19.6002	7.44001	6.24515	9.4492	3.77864	3.41895	4.29829	1.90682	2.60808	3.40267	1.73802	4.29538	2.29682	3.47509	5.2897	5.74282	3.47239	6.01995	3.94229	4.24798	5.85486	3.82137	5.17291	5.2729	3.86082	6.85049	0.150843
TCGA-MI-A75G	2.66516	3.53138	7.91058	4.7173	4.95088	5.15742	1.5133	5.17593	5.00464	1.0779	2.553	2.1972	5.4426	0.966623	3.39487	5.26746	2.65809	2.02939	3.15506	0.968881	2.72015	7.99884	21.4797	7.65888	3.34719	8.56391	3.49082	1.53156	3.35981	1.98681	1.16969	1.94518	2.00294	2.23054	2.81495	4.12325	1.41527	2.18987	6.73545	2.06767	4.89845	10.5406	4.81293	4.22437	9.23081	3.3091	2.01056	4.64056	0.343684
TCGA-MI-A75H	3.0969	2.87369	4.43435	5.1344	1.40272	7.55071	4.6926	1.84364	7.16353	5.79869	2.61747	10.4504	5.19148	3.17688	2.35015	2.89627	1.75883	3.51616	1.64157	1.69259	1.47743	12.4072	21.1194	10.2801	5.4337	9.98901	4.47581	2.66148	6.27868	2.023	2.2248	4.89192	1.50087	2.55817	4.20661	3.12072	4.96176	4.87664	2.91952	4.91139	3.59701	5.82531	3.19244	4.387	2.84541	7.42105	3.98399	6.23022	0.211875
TCGA-MI-A75I	8.44252	5.144	1.92878	2.80432	2.86043	3.28743	4.63924	2.78053	2.03386	7.91087	5.19747	3.61686	3.1855	1.76027	1.02823	4.26042	6.81156	1.16588	1.70424	6.35131	1.19538	7.40561	6.50724	13.9792	4.36043	4.75022	8.44398	2.90006	3.41668	5.09973	2.52065	2.72553	3.29938	3.4438	4.39105	7.32824	4.43118	3.9445	8.91661	7.01702	7.89345	9.26519	5.07049	3.76428	6.53596	3.08987	2.93665	4.63988	0.381198
TCGA-MR-A520	6.66033	5.98925	2.96782	6.2768	3.30241	2.68138	4.63123	8.90314	2.12266	5.54873	1.46133	4.48382	6.72306	4.4467	1.97206	9.83428	0	2.05711	6.52101	1.26775	6.69172	4.4678	15.6669	5.03841	2.30186	15.573	3.37023	1.58611	7.85924	2.50841	0.82216	4.7788	1.75667	1.55877	4.70615	1.61477	1.32116	5.5982	1.45615	2.066	5.83697	1.11331	4.12392	3.39151	1.33624	5.64631	3.16301	2.19686	0.379979
TCGA-MR-A8JO	3.87472	4.07988	7.55263	4.83823	2.52825	9.21899	1.85583	4.29413	7.20681	4.00261	3.80888	4.02647	3.97424	3.0499	3.19981	3.62435	0.847503	3.50792	4.63535	2.51011	1.22258	8.00741	22.1596	7.07431	4.30444	9.63252	3.42344	2.4484	4.50252	1.83231	2.29253	3.17784	1.49977	2.16285	3.93012	1.80304	1.41687	2.87534	2.34168	4.76184	3.77039	4.65452	4.15673	3.65867	7.96179	6.62219	2.45382	4.44801	0.351906
TCGA-NI-A4U2	13.0535	2.42697	4.439	5.2721	4.12276	4.72898	3.17902	5.78655	2.96266	3.73114	1.42245	1.60127	4.92956	2.89071	3.23532	2.55687	2.20417	2.61534	3.45198	1.96345	1.12511	5.77736	20.343	10.7351	3.39427	7.14267	5.17722	2.34179	3.49139	2.36818	2.53881	5.05155	1.59483	4.70972	8.2233	2.72363	7.17928	7.80798	5.28687	3.84266	8.14411	5.373	4.81866	6.81192	6.27274	6.61111	3.85415	3.63175	0.373887
TCGA-NI-A8LF	8.72901	3.28688	7.83245	4.64428	1.41621	0.6978	4.12859	2.95433	4.02344	2.3461	2.46596	5.61511	2.26212	2.74861	2.65394	3.14779	3.1786	4.00684	3.74399	2.87485	3.87889	11.0642	20.1704	6.31259	5.35641	9.99921	2.84305	2.5009	4.03155	1.35516	2.9238	4.19565	1.11066	5.5076	4.68089	1.29595	5.90225	4.59228	1.55846	5.06306	5.81886	2.268	5.61733	4.64812	2.87642	4.75253	4.43409	6.56883	0.100601
TCGA-O8-A75V	5.30138	6.50376	2.16625	4.44175	1.32969	1.14808	3.03045	4.80101	0.172635	4.34254	1.78394	5.48211	6.99201	5.23732	2.31999	4.12405	5.49171	4.42728	6.75906	1.94829	3.24909	6.82163	17.2817	7.6175	3.43229	7.05046	3.38432	2.22511	3.46567	1.90816	2.88101	5.43547	2.05592	2.54732	4.08642	3.71724	3.36876	5.79021	3.56077	3.03545	4.18958	4.15382	2.96605	4.14967	4.74432	3.38924	3.89098	5.73286	0.211442
TCGA-PD-A5DF	7.50715	0.866951	7.0712	5.36073	0.677007	6.20722	5.57526	0.793663	1.56519	2.90732	1.27487	2.51997	5.13537	2.10592	4.64887	5.15416	0.476601	2.48441	2.74581	0.427457	5.49473	7.03826	38.1781	7.94054	4.47309	13.2094	3.86393	2.573	5.04011	1.87702	2.38758	5.40519	1.18603	3.74234	6.85659	1.75674	6.45296	5.21415	1.37594	7.71519	2.22385	3.33996	6.45354	3.50537	5.09213	2.54519	2.44836	6.95124	0.22666
TCGA-QA-A7B7	3.37716	4.41752	8.65978	9.79258	4.31885	6.62642	2.80315	2.11509	6.25826	4.28642	3.07352	2.47805	3.06475	1.20921	4.84347	3.14977	2.70457	1.56359	1.56908	4.12333	1.00667	11.4665	18.2573	10.1376	6.70728	10.4415	6.21743	4.19925	4.45026	3.21547	3.7004	4.22879	3.50287	4.61032	6.47197	7.55962	8.68466	8.04243	5.553	10.7073	4.76398	10.8936	6.3497	5.05385	4.65185	5.86173	2.09216	5.05427	0.255832
TCGA-RC-A6M3	0.746381	4.06789	1.75058	0.547853	3.48989	1.05381	1.41039	2.624	0.362017	0.161593	1.88316	4.16169	0.420968	1.85482	2.15445	1.63995	2.48496	2.25245	2.66704	1.76052	0.952384	30.5193	8.07776	4.40449	5.41524	3.1899	1.74578	2.69187	1.23312	1.04129	1.82606	1.3026	0.929639	2.5454	1.29252	0.632431	6.0751	1.86874	0.825706	3.24146	1.9165	0.622878	2.32423	2.75858	0.751236	1.01597	2.51178	1.14679	0.00899352
TCGA-RC-A6M4	0	1.62432	3.56219	0	3.06591	7.28141	0	1.94778	3.71397	0	1.23937	4.88168	0	0.690209	4.29385	0	4.13532	2.20073	0	2.41075	4.59261	81.6813	14.0796	9.15746	10.3681	4.14119	4.0185	6.45599	1.52253	2.38654	1.49464	1.1001	2.06817	0	0.890574	1.97699	0	1.00422	2.60924	0	1.3853	3.81638	0	1.00393	2.67633	0	1.47748	2.61697	0
TCGA-RC-A6M5	0.85736	1.4416	1.45519	5.57405	5.46884	2.35281	0.241894	3.061	0.917952	0.951763	4.40684	2.49197	1.35267	3.64968	1.9991	2.21339	2.37818	0.576086	0.152918	1.52375	3.76885	34.6141	11.7843	11.3324	15.7141	4.49561	4.5547	6.41974	1.89225	2.31278	4.88697	1.63268	1.25561	5.18228	0.95546	1.50678	3.02017	1.74832	1.30264	2.26411	1.97621	1.7673	3.41321	3.0214	1.88915	0.309846	1.49782	2.59973	0
TCGA-RC-A6M6	5.24968	7.32762	1.81773	2.39837	6.87586	2.60292	6.01237	3.98054	1.18463	4.6706	4.34225	0.834467	2.51929	2.77443	1.42942	3.28615	2.47205	1.13183	4.03453	2.6099	0.166331	6.35284	9.68757	11.8437	3.64137	6.78368	6.23507	2.09084	3.55467	3.09308	2.47248	4.72987	2.25005	3.33418	6.55147	3.29358	2.31274	5.02658	3.96147	3.30468	4.42499	5.29394	4.39884	5.71153	5.21594	3.11487	1.88801	4.71909	0.25927
TCGA-RC-A7S9	6.55062	3.90617	2.795	6.03229	3.12824	3.15167	2.57029	4.9364	5.47702	4.49811	5.70501	2.52041	3.77226	1.97123	3.0459	5.12016	1.37652	1.84859	4.35082	3.75212	3.46125	10.9528	18.9288	6.86168	5.88639	8.56759	3.57247	4.9755	4.3445	1.78184	5.31733	3.45611	1.8423	5.71522	3.55877	1.23662	6.92475	6.20516	1.42381	5.53402	4.99438	6.28335	5.39428	4.48068	2.34657	5.24366	3.56474	4.12797	0.0740141
TCGA-RC-A7SB	3.51978	1.76018	2.64505	8.55288	2.04615	0.680799	8.3203	0.938963	1.18957	4.39287	2.69896	0.949815	10.1326	2.16207	1.49306	7.53991	0.40798	3.74295	3.24371	3.77385	3.70821	4.85309	25.9936	6.78997	3.23521	10.847	3.83356	2.71517	4.32432	2.03962	1.93179	4.96955	1.41726	3.11475	7.43589	2.41574	3.83739	3.81421	2.05139	3.66492	6.01995	1.27979	4.56351	2.89926	1.31059	8.24306	1.96419	1.84802	0.222694
TCGA-RC-A7SF	5.81575	2.20014	4.96846	6.11482	3.65845	5.26384	3.67693	3.24571	1.28199	4.28895	1.93858	3.8978	6.54198	1.98294	3.01812	5.15318	1.25616	1.73984	2.73974	1.59124	2.98281	12.8043	25.4377	6.01149	6.25461	9.18996	3.07696	3.09216	2.75778	1.49486	2.53825	4.20879	1.21339	5.00024	3.84119	3.23019	4.35994	7.48494	2.60879	4.21498	4.21335	7.34619	8.94879	5.11489	5.22286	4.3702	5.01017	6.10633	0.123345
TCGA-RC-A7SH	3.38973	3.48189	11.1566	6.50404	1.4383	5.36165	3.69879	4.4182	3.75182	4.69503	1.37703	1.83017	6.47516	2.48404	3.80575	2.62767	1.91692	1.96316	1.84881	1.89956	1.78323	13.5001	31.5389	4.70111	6.23026	11.5659	2.81813	3.02581	4.02762	1.5246	3.01017	2.96304	2.15887	4.538	5.61142	3.84634	4.8879	4.826	4.52253	2.93496	4.06961	10.6968	10.1815	5.20591	7.33193	4.28199	3.39145	11.0609	0.117892
TCGA-RC-A7SK	9.69203	2.29804	6.18593	2.26281	2.72378	2.00302	1.90628	2.19439	2.50756	5.42636	1.10958	3.03786	2.15289	1.35042	4.64354	2.7062	1.92456	3.04184	1.10093	0.988719	3.32334	16.08	29.6136	12.0405	9.7431	11.8239	6.29217	4.44207	6.86304	2.48658	4.43826	7.79893	1.72543	9.89819	6.57248	1.46915	4.78295	4.69619	2.21825	6.58263	4.75288	2.79478	4.90002	3.34006	7.25856	4.71283	3.85645	2.9301	0.13627
TCGA-RG-A7D4	0.252904	3.29717	0.855095	1.70288	3.73123	1.25645	0	1.68572	2.80655	0.232506	1.91985	1.38604	1.22983	1.51656	2.44432	0.00597768	1.68501	1.85531	0.502851	1.93463	1.87862	46.7162	3.66679	1.99813	6.85147	1.8536	1.07517	1.09424	1.09646	0.573226	1.81903	2.11908	0.487686	2.33612	1.02443	0.549332	2.26209	2.17865	0.77296	0.153484	1.99268	1.03601	1.78362	1.53406	1.35305	2.76109	1.69426	1.27787	0.00181423
TCGA-T1-A6J8	5.52273	4.75637	8.96136	3.65796	4.37553	2.90804	4.14617	2.83527	2.59886	1.95387	4.03494	5.51677	1.90427	5.86361	3.80764	4.80284	3.30014	2.506	4.61193	3.39441	3.66995	6.73251	16.9568	11.602	4.17683	7.33134	5.21378	2.75121	3.28977	2.3859	2.40879	4.35242	2.36635	2.96606	4.68335	3.0137	2.43697	5.62027	5.27573	5.26538	3.67976	6.40159	3.29719	5.01863	8.48166	8.29967	3.99183	7.5768	0.389088
TCGA-UB-A7MA	2.89423	1.19407	4.48433	5.41446	1.83337	6.0501	3.78479	2.85314	3.71054	4.63911	1.21969	5.43806	3.87798	4.67004	1.95149	1.57765	2.99481	2.6594	4.20494	1.42235	1.19173	11.2265	20.4581	8.03276	5.78465	11.1183	4.65044	3.00438	5.25667	2.39696	3.34087	3.77717	3.26588	6.19126	4.81558	4.44411	5.17744	4.54569	3.63691	3.65131	2.7757	8.68644	7.35236	3.63488	4.28355	3.54245	4.28959	3.27486	0.133369
TCGA-UB-A7MB	4.6566	3.92825	2.98153	3.57886	1.79185	4.23628	4.45845	3.08483	2.11334	3.84687	2.26443	1.51693	5.01385	1.86752	2.348	2.8403	1.64222	5.20998	4.19628	3.14923	2.85404	8.8365	24.4213	8.84247	5.02766	13.901	4.8945	2.5468	6.39795	2.72209	3.36264	5.40008	2.16108	4.1141	5.63752	1.65486	7.42101	6.39015	1.41666	2.4557	2.3847	5.81565	5.58754	2.17031	4.28209	1.79292	3.07794	3.05755	0.266464
TCGA-UB-A7MC	0.886998	0.857054	7.70147	0.39715	0.927444	4.75514	1.63679	1.06179	4.18836	1.63634	0.751925	3.65533	3.94594	1.19425	2.71362	0.15825	1.269	5.76004	0.0298017	0.84001	2.16348	39.3644	23.0663	8.5682	11.2933	4.19259	3.19711	6.38834	1.48554	1.49054	8.26593	0.967289	1.70433	7.34844	1.42558	3.28537	5.65297	0.647261	4.11854	1.96132	0.665857	3.11828	2.78865	0.603624	2.3308	1.72914	0.570204	1.5023	0.00411472
TCGA-UB-A7MD	2.53658	1.04889	3.43829	2.44697	1.60714	1.75256	1.98397	0.749562	2.4457	4.08346	3.06362	1.84394	2.73592	2.04202	1.86966	3.05672	0.719704	3.07243	3.17301	0.45536	2.71586	25.0413	11.2	4.12029	6.61774	4.16108	1.6911	4.55899	2.40201	1.11109	3.78347	2.76922	0.924622	3.94993	2.92699	1.5399	4.20259	1.96147	0.988314	4.36754	3.06805	2.60769	5.57396	4.56221	2.60413	5.35932	1.53682	5.09815	0
TCGA-UB-A7ME	7.99949	3.45908	3.72876	5.85069	2.3421	2.6488	4.77739	1.90245	5.16763	2.26374	3.18116	3.46361	2.32986	1.53755	3.46764	3.5263	0.812725	3.52723	2.99335	0.837078	5.98139	11.8566	31.2817	5.45923	4.87661	10.2876	2.45701	2.35529	3.27922	1.067	2.44261	3.70373	0.735081	4.96086	5.25704	0.777857	2.45807	5.69267	1.1956	6.74959	2.04036	1.40692	7.8135	5.35735	3.59862	5.19214	2.94508	4.81123	0.0824158
TCGA-UB-A7MF	3.18284	2.24176	1.96187	4.6538	3.5032	2.62605	0.509294	5.31246	3.09153	1.46609	2.71418	4.48763	4.5794	2.78324	4.03544	2.02196	1.96373	0.657339	2.35498	1.79081	2.39858	22.4166	17.9271	4.28297	5.75635	7.12711	2.11827	3.67867	2.78437	1.45792	1.01794	1.50168	0.715011	1.19089	3.34473	1.67525	6.72256	2.27409	1.85554	4.99445	2.30654	0.383223	0.756137	3.57142	3.25149	5.34861	3.44326	2.75262	0.1147
TCGA-UB-AA0U	6.91169	1.16992	2.66792	5.29631	1.78202	8.65871	0.596529	2.4197	3.20525	4.90671	2.44513	2.61076	5.07578	1.82507	2.21183	3.81735	2.1581	0.553175	4.55931	1.69723	0.461644	6.7498	21.0891	9.68675	4.08239	9.06092	4.9482	2.0286	4.22716	2.36387	2.06035	3.786	2.57006	1.70339	1.69507	3.55829	4.21311	2.76389	1.79481	5.20857	2.11837	3.73637	5.52406	1.6291	2.92193	3.43837	1.50734	3.9518	0.21811
TCGA-UB-AA0V	9.01741	1.44093	8.3275	2.12038	2.15546	5.81405	4.64404	0.809972	3.85389	3.70678	6.5755	0.972472	2.65157	1.32462	2.32045	2.64049	1.5336	3.71851	3.01131	1.44193	2.22368	8.93391	30.7798	6.13338	4.3145	9.47474	3.01259	2.16713	4.15548	1.28208	2.42974	2.63958	1.4058	2.70689	5.89678	2.69225	5.60019	4.63077	6.13487	3.84534	6.27287	7.8178	3.83052	2.68563	11.5752	4.58889	5.37553	6.11586	0.246822
TCGA-WJ-A86L	8.00704	3.91043	6.42378	3.06559	2.49383	2.14903	3.19579	3.4943	2.55582	2.10844	3.92375	2.41424	5.2942	3.59365	1.6113	4.27914	3.61082	1.9127	0.902051	3.04018	1.24244	9.95207	21.2658	6.35287	6.91882	9.26379	3.51497	4.86299	4.63413	2.18325	3.12063	4.26489	2.05509	6.55791	5.70923	2.07291	5.83514	2.96916	3.70017	8.04357	3.63906	2.89271	5.14277	3.08837	4.59178	3.06004	2.9409	5.39795	0.144983
TCGA-WQ-A9G7	5.7934	4.85308	3.18844	3.92824	4.62195	2.73837	3.15992	3.3831	1.39875	3.47211	2.51332	2.88685	4.32373	3.62082	8.38761	6.8289	2.47106	4.77338	2.75964	2.48695	3.25077	9.92858	11.1847	10.8441	4.62999	7.02218	4.87934	2.6658	3.86369	3.27011	2.87446	3.32445	2.82407	6.12722	4.90612	3.29746	8.45925	3.35781	4.66459	7.51441	7.17514	4.19861	4.80587	5.47665	4.41137	7.26318	6.9521	3.16089	0.187673
TCGA-WQ-AB4B	7.36342	2.38805	8.03292	5.92913	2.3231	3.55909	5.04426	2.79845	6.53082	2.14378	1.59924	1.2596	2.90513	1.79327	1.35271	1.40201	3.02647	2.52459	2.37127	2.22684	4.04765	9.80247	24.2614	6.27262	4.42932	8.60099	2.99033	2.16021	3.55129	1.61528	2.14742	2.69048	1.7873	1.59625	4.50958	3.00416	1.79511	3.55479	10.1444	1.17703	3.65615	3.50717	2.20374	3.91112	6.86498	4.36762	3.96918	13.4411	0.315051
TCGA-WX-AA44	4.87816	1.88261	8.61807	5.52464	3.81234	7.20135	5.05417	3.16041	11.0447	1.94578	3.5077	1.66558	2.86853	1.14726	0.871622	2.17707	2.7948	4.77939	1.50045	1.43176	2.995	16.0146	24.8312	10.3095	6.64676	10.7878	4.91474	3.19606	5.16737	2.54775	4.86295	4.03126	2.91085	5.61047	6.39482	3.46306	7.11208	4.75157	5.94715	6.76195	1.99248	11.1856	12.2542	5.84635	2.99719	8.33221	4.84849	4.33696	0.155526
TCGA-WX-AA46	1.37474	1.65199	1.55555	1.81479	4.3576	5.11806	5.88186	2.09369	6.01146	4.95202	2.02801	1.98385	6.8965	2.74474	2.3742	6.55299	3.15309	4.48541	7.77516	3.14352	2.4135	7.39142	14.9735	7.43967	4.16462	6.64257	4.68691	2.32267	3.24714	2.69863	1.86043	2.039	2.32092	3.24805	1.82686	5.485	2.16204	1.57692	7.30844	1.73961	1.64831	7.68327	0.690416	1.83222	5.30027	3.00997	1.07404	3.22543	0.210068
TCGA-WX-AA47	3.98446	2.34859	1.31542	8.60007	4.35876	2.68927	3.11222	4.44734	1.702	2.0897	4.64101	1.50066	1.31321	3.35651	1.19201	5.17141	5.06847	4.27913	1.90327	1.68759	2.61509	12.7324	12.835	5.95925	6.16791	6.075	2.95838	3.80292	3.41942	1.833	5.18767	3.1443	1.49861	9.14524	4.9525	0.918614	5.78667	3.48577	1.59447	6.21199	4.30727	2.20154	6.1682	4.08294	2.8533	8.45737	2.80982	0.970609	0.0736063
TCGA-XR-A8TC	3.80663	5.71122	5.74722	5.36342	3.20582	4.30086	5.86869	0.945701	2.98153	3.19396	3.66498	2.52987	3.36291	2.09538	2.11441	1.2416	0.33801	3.23008	4.18987	2.71488	2.08416	7.93491	24.2538	12.4355	4.06706	8.69209	5.08911	2.33234	3.72741	2.32703	3.26593	4.75868	3.23617	4.99984	9.09612	5.21274	6.64192	3.60518	8.64856	4.88769	7.59426	3.99019	9.579	4.70171	7.25395	8.4447	2.23692	7.83972	0.374378
TCGA-XR-A8TD	6.27001	6.85125	7.20065	6.02143	1.98522	1.97045	3.25288	2.33685	2.84466	3.43292	1.90913	2.17472	1.81167	1.08282	1.49885	4.86771	0.729547	4.56564	0.983698	0.429301	1.38703	9.73428	21.0283	11.7187	5.45473	12.0943	6.8433	3.3879	5.34153	3.46561	4.42907	5.82805	3.13377	6.7653	7.74676	5.91492	4.06024	9.76342	5.84405	6.4041	6.56921	9.35788	10.7147	3.81991	5.42761	11.4163	4.00361	3.70001	0.183666
TCGA-XR-A8TE	4.16391	3.25498	3.90331	4.27048	5.84196	5.78649	5.65709	3.82585	3.56431	6.38095	2.62996	2.73771	3.57357	0.323701	2.99154	1.27186	2.23394	1.67478	1.14467	1.58935	1.61974	9.32568	19.3006	11.5057	5.20214	8.91793	5.90523	2.53456	3.4535	2.3866	2.6076	3.25456	5.45069	7.55511	7.50508	8.37266	7.80921	6.12644	6.26178	3.83979	5.48188	6.92025	5.33622	4.19548	6.41386	9.55897	6.35065	4.83266	0.31558
TCGA-XR-A8TF	4.70548	3.61466	4.25862	5.55419	3.38275	0.365614	6.26963	2.13787	2.81997	3.84005	2.19711	2.71073	5.34387	1.87303	2.0776	3.82788	1.73627	3.50728	1.97479	1.34204	2.57941	8.1804	21.0234	6.36374	4.53033	10.1038	3.05103	3.93912	4.53679	1.76371	4.48502	5.75122	1.61156	4.97124	4.9271	1.20253	6.49577	9.88477	1.32257	5.41736	4.46258	2.63742	5.949	4.11595	1.75773	4.80741	4.92362	4.09372	0.129416
TCGA-XR-A8TG	4.94722	3.63039	3.5874	4.90269	4.56686	2.63387	4.39133	1.0866	1.94899	3.26838	5.37409	3.18542	0.595693	5.00736	2.29597	6.70162	1.37465	2.26755	4.57917	1.7625	2.09208	9.82938	15.6414	16.0069	4.63024	8.48939	8.04705	3.06837	4.50582	3.43538	4.32905	5.94422	6.33443	7.8782	6.27419	7.71343	8.58724	8.47828	6.97984	5.15423	2.05765	10.6233	6.40271	5.89252	4.35707	11.0246	4.51294	4.0576	0.304289
TCGA-YA-A8S7	7.45832	4.41765	1.63279	1.49881	4.74168	1.55925	8.32851	1.87793	1.81979	3.37619	2.87215	1.03049	3.68622	1.29193	2.54444	3.97349	2.54996	5.17665	0.618415	0.864987	4.36776	6.27468	14.0024	13.3432	3.70688	8.61842	6.23337	2.03546	4.68065	3.04413	2.81666	4.79398	1.95878	4.75129	10.1273	2.05878	4.4149	5.48983	3.90448	6.97752	9.27549	2.37897	6.28919	4.92047	2.9152	4.96204	3.09786	4.23143	0.0846942
TCGA-ZP-A9CV	2.10399	3.31174	2.39489	2.70812	4.92835	1.90933	2.64537	2.93991	5.14241	1.88255	0.843386	2.27165	5.4927	1.96682	4.24402	0.862303	2.06772	1.14058	1.79795	3.27005	1.75205	5.02371	16.5303	8.57789	2.79073	7.0108	3.72355	1.73227	4.01112	1.93483	1.4163	2.6327	1.75049	1.84603	4.60013	2.41378	2.6547	2.46755	2.14795	3.84648	2.5029	3.40463	2.42822	3.66988	1.42217	5.48126	3.86199	1.7475	0.310331
TCGA-ZP-A9CY	6.51224	3.74604	4.06222	4.21608	3.92266	0.643	4.68604	2.19308	3.23075	4.671	2.76457	0.884811	0.939607	1.66234	2.86962	3.7324	0.516165	2.07288	3.82977	1.34473	0.701188	8.06818	20.1726	8.1691	3.89864	9.04199	5.62462	2.22634	4.0477	4.50097	3.56518	3.16553	3.69507	4.82314	1.37648	3.29496	7.62783	1.20742	4.68164	4.98672	1.40045	5.00759	7.08933	2.42333	2.82385	3.59612	0.359435	2.79034	0.0686917
TCGA-ZP-A9CZ	3.08384	2.33474	2.01425	4.45784	5.34415	2.19303	8.91256	4.19205	0.434295	2.53872	2.94129	5.76971	2.76967	2.8657	1.2886	6.29449	0.97329	1.5587	2.664	2.48344	4.02352	5.12761	17.6055	7.97334	2.51017	8.50498	3.51757	1.77034	5.04946	1.66779	2.16034	5.26545	1.75352	1.92302	5.78845	2.22742	2.89931	6.10238	1.54118	3.78585	3.47895	1.73954	1.16513	5.69107	5.59268	5.65713	3.82275	2.20058	0.101822
TCGA-ZP-A9D0	2.05684	1.17265	0.294353	3.19788	4.78061	0.222451	6.29675	4.00486	0.297225	2.67366	6.04032	0.175829	9.63223	1.05547	0.599584	2.29606	4.32518	0.306045	1.40808	1.49488	1.96027	3.72645	21.3323	8.91467	1.93123	6.92696	3.72085	0.918561	2.89938	1.86493	0.82703	3.1223	1.47375	0.851514	4.21044	2.02664	1.52185	5.58029	1.66125	2.76823	2.74197	1.48767	2.69546	3.19131	2.02546	2.68127	3.13973	1.04981	0.157368
TCGA-ZP-A9D1	5.91595	4.4216	2.86731	3.68596	4.19075	5.83805	2.57259	4.25451	8.13237	2.41728	2.95556	3.64386	3.13291	3.87783	2.34458	7.21455	0.852607	3.76261	3.94469	1.74874	7.34056	8.57841	23.2683	7.95122	3.90751	9.29533	3.42816	2.0734	3.40811	1.76398	1.63384	2.73324	1.78102	3.80093	3.30485	2.57535	5.18035	4.47082	4.01422	5.42265	2.88649	1.72006	3.57608	3.13292	2.8742	3.45059	2.89279	2.74515	0.280944
TCGA-ZP-A9D2	2.92666	0.869706	0.152263	6.10449	3.22288	0.666667	2.40173	1.08945	0.648642	3.08274	1.38402	1.04785	2.3019	3.34329	4.19964	5.80624	4.71934	0.70291	1.70406	3.03228	0.707459	4.95114	15.863	9.33602	2.28627	7.25068	3.99161	1.37423	3.93574	1.67538	1.07469	2.74778	1.47799	1.55877	5.08969	1.79035	1.86126	4.70504	1.77475	1.10802	5.83035	1.20523	0.86232	3.08742	0.989829	5.24789	4.54365	2.17059	0.152552
TCGA-ZP-A9D4	4.38316	3.08143	2.78176	2.63897	4.41027	1.94016	4.65305	4.30517	2.3926	1.1403	3.57652	2.31059	5.21513	2.60949	9.92025	4.29778	3.42308	1.37342	5.55699	2.4941	1.56009	5.80086	25.3488	8.93715	2.50992	8.10568	3.53165	1.30049	3.34686	1.60742	1.5593	3.66222	1.26197	1.77488	2.85129	3.12507	1.29685	1.73946	4.91726	5.02853	5.59156	4.26403	3.31779	4.17188	4.95856	4.79414	4.34258	4.28037	0.403065
TCGA-ZS-A9CD	6.17884	3.13559	3.64034	3.74857	2.24843	5.42717	6.16494	1.85477	1.8471	8.40037	2.22651	1.34558	3.51503	1.81414	1.46489	2.9501	2.98491	9.08068	0.587715	1.62063	1.56654	8.95492	23.5939	7.69123	6.8055	7.16851	3.75062	4.69523	3.00132	1.98858	2.88995	2.46139	1.37498	5.02011	3.03911	1.52724	5.11605	3.18828	1.61052	6.34265	2.72928	3.58365	6.70283	4.62104	3.16641	3.63627	3.17204	3.05238	0.302933
TCGA-ZS-A9CE	4.9241	2.04045	4.5478	2.83774	2.1954	1.14879	5.69081	3.25234	2.3085	5.28513	3.16824	0.860389	5.29485	3.44868	1.67385	2.93978	2.85104	0.475507	1.63586	3.48491	0.715107	5.65582	22.8992	8.74786	3.44312	12.6279	5.15477	1.95497	3.79492	2.28351	2.41094	2.64336	1.77751	4.89995	2.41131	1.10713	6.0301	5.27795	1.04828	4.84175	4.92175	3.27995	4.73888	1.06172	2.39186	8.14368	2.26069	8.88264	0.342368
TCGA-ZS-A9CF	3.17206	0.539532	1.89744	4.75645	2.86954	0.762423	5.72699	2.05884	0.653181	3.03992	2.26518	1.35489	3.8779	0.630369	5.29136	4.36297	1.73739	1.84876	6.57216	1.38536	1.29612	9.36035	13.8495	4.40535	8.13795	5.16317	2.48933	5.90042	1.64902	1.14072	4.4669	2.11235	0.913537	3.79199	1.41721	0.401501	3.11561	0.869476	0.240486	4.07359	1.79584	0.627728	4.52687	1.15034	1.68681	2.64925	0.950456	3.04197	0.0620344
TCGA-ZS-A9CG	1.49191	1.58798	1.51371	1.36995	2.90715	2.24093	1.4732	2.25048	3.54783	3.9684	1.92578	3.98983	0.310589	1.91648	4.09981	0.811339	3.38686	4.15282	4.45859	3.4775	3.8629	8.42146	2.43368	4.32564	10.2204	2.48849	4.79428	5.98755	2.29299	3.8961	3.51218	1.61828	3.08481	2.44586	1.40562	2.9154	1.72691	1.49013	2.60832	1.48446	1.55624	1.69665	1.14243	1.72246	1.87798	1.25242	2.40903	0.969289	0.0413781
[truncated: 2,681 more columns]

## Sheet: Table S4
TableS4. Spearman correlation analysis.
Feature	Correlation	P_Value	FDR
Total_Granularity_10_Eosin	0.0287842	0.627245	0.869059
Total_Granularity_10_Hematoxylin	0.0565806	0.339308	0.702133
Total_Granularity_10_OrigGray	0.0280543	0.635813	0.869746
Total_Granularity_11_Eosin	-0.11387	0.0539871	0.363688
Total_Granularity_11_Hematoxylin	0.0998844	0.0912137	0.441611
Total_Granularity_11_OrigGray	0.0671402	0.256734	0.628046
Total_Granularity_12_Eosin	0.0253395	0.669034	0.888015
Total_Granularity_12_Hematoxylin	0.026007	0.660666	0.88465
Total_Granularity_12_OrigGray	-0.0203115	0.731722	0.917041
Total_Granularity_13_Eosin	-0.0431291	0.466733	0.784239
Total_Granularity_13_Hematoxylin	0.113722	0.0543413	0.363688
Total_Granularity_13_OrigGray	0.127211	0.0312655	0.314082
Total_Granularity_14_Eosin	-0.0791131	0.181384	0.566867
Total_Granularity_14_Hematoxylin	0.0393895	0.506051	0.808523
Total_Granularity_14_OrigGray	0.0361732	0.541417	0.830269
Total_Granularity_15_Eosin	-0.0115018	0.846169	0.961606
Total_Granularity_15_Hematoxylin	-0.0432383	0.465377	0.783899
Total_Granularity_15_OrigGray	-0.0371955	0.530044	0.822453
Total_Granularity_16_Eosin	-0.0316346	0.593536	0.850853
Total_Granularity_16_Hematoxylin	-0.0366869	0.535909	0.825391
Total_Granularity_16_OrigGray	-0.0980772	0.0972453	0.453265
Total_Granularity_1_Eosin	0.134467	0.0227646	0.266053
Total_Granularity_1_Hematoxylin	-0.175353	0.00290972	0.114381
Total_Granularity_1_OrigGray	0.115245	0.0511748	0.360212
Total_Granularity_2_Eosin	0.0824597	0.163458	0.547615
Total_Granularity_2_Hematoxylin	-0.146314	0.0131531	0.222176
Total_Granularity_2_OrigGray	0.0920969	0.119494	0.489894
Total_Granularity_3_Eosin	0.00532902	0.928336	0.98217
Total_Granularity_3_Hematoxylin	-0.0366148	0.536489	0.825391
Total_Granularity_3_OrigGray	0.0502374	0.396272	0.736941
Total_Granularity_4_Eosin	-0.0385844	0.514789	0.81177
Total_Granularity_4_Hematoxylin	-0.124609	0.0349136	0.325981
Total_Granularity_4_OrigGray	0.0411321	0.487407	0.796913
Total_Granularity_5_Eosin	0.00800977	0.892466	0.973158
Total_Granularity_5_Hematoxylin	-0.0472769	0.424717	0.756692
Total_Granularity_5_OrigGray	0.0495724	0.402559	0.742544
Total_Granularity_6_Eosin	-0.0209389	0.723767	0.914244
Total_Granularity_6_Hematoxylin	-0.0773424	0.191264	0.581545
Total_Granularity_6_OrigGray	0.0509374	0.389717	0.733845
Total_Granularity_7_Eosin	0.0034493	0.953605	0.98635
Total_Granularity_7_Hematoxylin	-0.0749779	0.205223	0.590044
Total_Granularity_7_OrigGray	0.0561755	0.342782	0.704377
Total_Granularity_8_Eosin	-0.00494424	0.933537	0.98217
Total_Granularity_8_Hematoxylin	0.0366407	0.536201	0.825391
Total_Granularity_8_OrigGray	0.0629071	0.287996	0.663686
Total_Granularity_9_Eosin	0.0376453	0.525302	0.819655
Total_Granularity_9_Hematoxylin	0.0834547	0.158424	0.544643
Total_Granularity_9_OrigGray	0.00777424	0.89561	0.97362
Total_Intensity_LowerQuartileIntensity_Eosin	-0.0557895	0.346324	0.707491
Total_Intensity_LowerQuartileIntensity_Hematoxylin	0.161324	0.00621099	0.152002
Total_Intensity_LowerQuartileIntensity_OrigGray	-0.103175	0.0809975	0.417271
Total_Intensity_MADIntensity_Eosin	-0.0464262	0.433334	0.7645
Total_Intensity_MADIntensity_Hematoxylin	0.0513689	0.38571	0.728772
Total_Intensity_MADIntensity_OrigGray	-0.0122449	0.836269	0.958744
Total_Intensity_MaxIntensity_Eosin	-0.0186612	0.752779	0.920135
Total_Intensity_MaxIntensity_Hematoxylin	0.0192452	0.745452	0.917041
Total_Intensity_MaxIntensity_OrigGray	-0.106805	0.070815	0.395081
Total_Intensity_MeanIntensity_Eosin	-0.0727601	0.218974	0.600832
Total_Intensity_MeanIntensity_Hematoxylin	0.1785	0.00243568	0.101811
Total_Intensity_MeanIntensity_OrigGray	-0.0908385	0.124647	0.490028
Total_Intensity_MedianIntensity_Eosin	-0.0885294	0.134608	0.507482
Total_Intensity_MedianIntensity_Hematoxylin	0.182626	0.001921	0.101811
Total_Intensity_MedianIntensity_OrigGray	-0.0750428	0.20483	0.589773
Total_Intensity_MinIntensity_Eosin	-0.0335922	0.570875	0.842087
Total_Intensity_MinIntensity_Hematoxylin	0.0971901	0.100339	0.458188
Total_Intensity_MinIntensity_OrigGray	-0.00733921	0.901479	0.974612
Total_Intensity_PercentMaximal_Eosin	0.0178975	0.762725	0.923111
Total_Intensity_PercentMaximal_Hematoxylin	0.00553258	0.92565	0.981814
Total_Intensity_PercentMaximal_OrigGray	-0.0774599	0.190706	0.581545
Total_Intensity_StdIntensity_Eosin	-0.140633	0.0171925	0.251082
Total_Intensity_StdIntensity_Hematoxylin	-0.0104113	0.860514	0.966208
Total_Intensity_StdIntensity_OrigGray	-0.0290482	0.62389	0.866916
Total_Intensity_TotalIntensity_Eosin	-0.0727601	0.218974	0.600832
Total_Intensity_TotalIntensity_Hematoxylin	0.1785	0.00243568	0.101811
Total_Intensity_TotalIntensity_OrigGray	-0.0908385	0.124647	0.490028
Total_Intensity_UpperQuartileIntensity_Eosin	-0.0858902	0.146594	0.529647
Total_Intensity_UpperQuartileIntensity_Hematoxylin	0.185672	0.00160707	0.0949221
Total_Intensity_UpperQuartileIntensity_OrigGray	-0.0760937	0.198671	0.586042
Total_Texture_AngularSecondMoment_Eosin_3_00_256	-0.073986	0.211294	0.598629
Total_Texture_AngularSecondMoment_Eosin_3_01_256	-0.0713519	0.228039	0.603996
Total_Texture_AngularSecondMoment_Eosin_3_02_256	-0.0710575	0.229968	0.607522
Total_Texture_AngularSecondMoment_Eosin_3_03_256	-0.0723504	0.221584	0.601442
Total_Texture_AngularSecondMoment_Hematoxylin_3_00_256	-0.110196	0.0622971	0.381946
Total_Texture_AngularSecondMoment_Hematoxylin_3_01_256	-0.115962	0.049738	0.357509
Total_Texture_AngularSecondMoment_Hematoxylin_3_02_256	-0.110939	0.0605447	0.379907
Total_Texture_AngularSecondMoment_Hematoxylin_3_03_256	-0.116975	0.047767	0.354217
Total_Texture_AngularSecondMoment_OrigGray_3_00_256	-0.100411	0.0895127	0.439
Total_Texture_AngularSecondMoment_OrigGray_3_01_256	-0.0990184	0.0940657	0.447785
Total_Texture_AngularSecondMoment_OrigGray_3_02_256	-0.0937142	0.113118	0.480364
Total_Texture_AngularSecondMoment_OrigGray_3_03_256	-0.100593	0.0889319	0.437732
Total_Texture_Contrast_Eosin_3_00_256	0.0213237	0.718904	0.912407
Total_Texture_Contrast_Eosin_3_01_256	-0.00573157	0.922939	0.980835
Total_Texture_Contrast_Eosin_3_02_256	0.00401123	0.946027	0.985944
Total_Texture_Contrast_Eosin_3_03_256	-0.00335132	0.954897	0.98635
Total_Texture_Contrast_Hematoxylin_3_00_256	0.0124413	0.83368	0.957763
Total_Texture_Contrast_Hematoxylin_3_01_256	-0.0184044	0.756074	0.920364
Total_Texture_Contrast_Hematoxylin_3_02_256	-0.0064864	0.912827	0.979091
Total_Texture_Contrast_Hematoxylin_3_03_256	-0.0172414	0.771044	0.92695
Total_Texture_Contrast_OrigGray_3_00_256	0.100279	0.089938	0.439499
Total_Texture_Contrast_OrigGray_3_01_256	0.0634853	0.283581	0.657791
Total_Texture_Contrast_OrigGray_3_02_256	0.0731149	0.216731	0.600297
Total_Texture_Contrast_OrigGray_3_03_256	0.0620964	0.294263	0.669094
Total_Texture_Correlation_Eosin_3_00_256	-0.134971	0.0222571	0.266053
Total_Texture_Correlation_Eosin_3_01_256	-0.11727	0.0472044	0.354217
Total_Texture_Correlation_Eosin_3_02_256	-0.11372	0.0543457	0.363688
Total_Texture_Correlation_Eosin_3_03_256	-0.126418	0.0323403	0.318285
Total_Texture_Correlation_Hematoxylin_3_00_256	-0.0172688	0.77069	0.92695
Total_Texture_Correlation_Hematoxylin_3_01_256	0.0330792	0.57656	0.842665
Total_Texture_Correlation_Hematoxylin_3_02_256	0.00405083	0.945495	0.985881
Total_Texture_Correlation_Hematoxylin_3_03_256	0.0267959	0.651044	0.880702
Total_Texture_Correlation_OrigGray_3_00_256	-0.107733	0.0684062	0.389643
Total_Texture_Correlation_OrigGray_3_01_256	-0.0723712	0.221451	0.601442
Total_Texture_Correlation_OrigGray_3_02_256	-0.0831039	0.160185	0.544643
Total_Texture_Correlation_OrigGray_3_03_256	-0.0805582	0.173413	0.55825
Total_Texture_DifferenceEntropy_Eosin_3_00_256	0.0355539	0.548365	0.834216
Total_Texture_DifferenceEntropy_Eosin_3_01_256	0.0191226	0.746872	0.917798
Total_Texture_DifferenceEntropy_Eosin_3_02_256	0.0251522	0.671157	0.889095
Total_Texture_DifferenceEntropy_Eosin_3_03_256	0.0225887	0.702995	0.904371
Total_Texture_DifferenceEntropy_Hematoxylin_3_00_256	0.0133896	0.821209	0.951482
Total_Texture_DifferenceEntropy_Hematoxylin_3_01_256	-0.0095763	0.871601	0.968168
Total_Texture_DifferenceEntropy_Hematoxylin_3_02_256	-0.0027569	0.962891	0.987236
Total_Texture_DifferenceEntropy_Hematoxylin_3_03_256	-0.0104814	0.859585	0.966208
Total_Texture_DifferenceEntropy_OrigGray_3_00_256	0.0736423	0.213427	0.600214
Total_Texture_DifferenceEntropy_OrigGray_3_01_256	0.0488561	0.409398	0.749826
Total_Texture_DifferenceEntropy_OrigGray_3_02_256	0.0551374	0.351785	0.709577
Total_Texture_DifferenceEntropy_OrigGray_3_03_256	0.0515907	0.383659	0.725934
Total_Texture_DifferenceVariance_Eosin_3_00_256	-0.0451413	0.445954	0.774016
Total_Texture_DifferenceVariance_Eosin_3_01_256	-0.0419357	0.478936	0.789605
Total_Texture_DifferenceVariance_Eosin_3_02_256	-0.0426449	0.471528	0.785692
Total_Texture_DifferenceVariance_Eosin_3_03_256	-0.0428281	0.469623	0.785692
Total_Texture_DifferenceVariance_Hematoxylin_3_00_256	-0.0381377	0.51967	0.815681
Total_Texture_DifferenceVariance_Hematoxylin_3_01_256	-0.0272502	0.645528	0.876812
Total_Texture_DifferenceVariance_Hematoxylin_3_02_256	-0.0307746	0.603414	0.857266
Total_Texture_DifferenceVariance_Hematoxylin_3_03_256	-0.0338341	0.567888	0.841763
Total_Texture_DifferenceVariance_OrigGray_3_00_256	-0.0593898	0.315843	0.680267
Total_Texture_DifferenceVariance_OrigGray_3_01_256	-0.0485394	0.412444	0.752088
Total_Texture_DifferenceVariance_OrigGray_3_02_256	-0.0508074	0.390929	0.734201
Total_Texture_DifferenceVariance_OrigGray_3_03_256	-0.0564314	0.340585	0.703169
Total_Texture_Entropy_Eosin_3_00_256	0.0235308	0.69123	0.898169
Total_Texture_Entropy_Eosin_3_01_256	0.0180439	0.760704	0.922281
Total_Texture_Entropy_Eosin_3_02_256	0.0183079	0.757312	0.920634
Total_Texture_Entropy_Eosin_3_03_256	0.0189536	0.749034	0.918777
Total_Texture_Entropy_Hematoxylin_3_00_256	0.0528511	0.372136	0.718279
Total_Texture_Entropy_Hematoxylin_3_01_256	0.0474657	0.422868	0.756667
Total_Texture_Entropy_Hematoxylin_3_02_256	0.0470693	0.426755	0.758335
Total_Texture_Entropy_Hematoxylin_3_03_256	0.0486637	0.411246	0.751254
Total_Texture_Entropy_OrigGray_3_00_256	0.0437383	0.460229	0.7803
Total_Texture_Entropy_OrigGray_3_01_256	0.0344259	0.561132	0.838383
Total_Texture_Entropy_OrigGray_3_02_256	0.0366498	0.536099	0.825391
Total_Texture_Entropy_OrigGray_3_03_256	0.035099	0.553496	0.837682
Total_Texture_InfoMeas1_Eosin_3_00_256	0.0962696	0.103592	0.459901
Total_Texture_InfoMeas1_Eosin_3_01_256	0.0958604	0.105073	0.462696
Total_Texture_InfoMeas1_Eosin_3_02_256	0.0914467	0.122135	0.489894
Total_Texture_InfoMeas1_Eosin_3_03_256	0.0998174	0.0914319	0.441611
Total_Texture_InfoMeas1_Hematoxylin_3_00_256	0.0135256	0.819424	0.950224
Total_Texture_InfoMeas1_Hematoxylin_3_01_256	0.000286807	0.996141	0.998301
Total_Texture_InfoMeas1_Hematoxylin_3_02_256	0.000188836	0.99746	0.998301
Total_Texture_InfoMeas1_Hematoxylin_3_03_256	0.00796815	0.893021	0.973158
Total_Texture_InfoMeas1_OrigGray_3_00_256	0.0795231	0.179018	0.564943
Total_Texture_InfoMeas1_OrigGray_3_01_256	0.0639036	0.280416	0.653423
Total_Texture_InfoMeas1_OrigGray_3_02_256	0.0665549	0.260911	0.633234
Total_Texture_InfoMeas1_OrigGray_3_03_256	0.071057	0.229971	0.607522
Total_Texture_InfoMeas2_Eosin_3_00_256	-0.116662	0.0483695	0.354231
Total_Texture_InfoMeas2_Eosin_3_01_256	-0.113841	0.0540876	0.363688
Total_Texture_InfoMeas2_Eosin_3_02_256	-0.0997925	0.091513	0.441611
Total_Texture_InfoMeas2_Eosin_3_03_256	-0.117823	0.0461667	0.354217
Total_Texture_InfoMeas2_Hematoxylin_3_00_256	-0.0203262	0.731535	0.917041
Total_Texture_InfoMeas2_Hematoxylin_3_01_256	-0.0042752	0.942481	0.985511
Total_Texture_InfoMeas2_Hematoxylin_3_02_256	-0.00673666	0.909478	0.977269
Total_Texture_InfoMeas2_Hematoxylin_3_03_256	-0.00960472	0.871223	0.968168
Total_Texture_InfoMeas2_OrigGray_3_00_256	-0.106557	0.071492	0.396627
Total_Texture_InfoMeas2_OrigGray_3_01_256	-0.0802551	0.17504	0.560831
Total_Texture_InfoMeas2_OrigGray_3_02_256	-0.0835552	0.157922	0.544132
Total_Texture_InfoMeas2_OrigGray_3_03_256	-0.0863968	0.14422	0.523158
Total_Texture_InverseDifferenceMoment_Eosin_3_00_256	-0.0649472	0.272623	0.645787
Total_Texture_InverseDifferenceMoment_Eosin_3_01_256	-0.0618685	0.296042	0.671967
Total_Texture_InverseDifferenceMoment_Eosin_3_02_256	-0.0601964	0.309306	0.678999
Total_Texture_InverseDifferenceMoment_Eosin_3_03_256	-0.065664	0.267358	0.642262
Total_Texture_InverseDifferenceMoment_Hematoxylin_3_00_256	-0.0590187	0.31888	0.681236
Total_Texture_InverseDifferenceMoment_Hematoxylin_3_01_256	-0.0645066	0.275895	0.648991
Total_Texture_InverseDifferenceMoment_Hematoxylin_3_02_256	-0.054244	0.359652	0.715742
Total_Texture_InverseDifferenceMoment_Hematoxylin_3_03_256	-0.0661315	0.263961	0.636363
Total_Texture_InverseDifferenceMoment_OrigGray_3_00_256	-0.0678468	0.251753	0.625469
Total_Texture_InverseDifferenceMoment_OrigGray_3_01_256	-0.0669031	0.25842	0.629146
Total_Texture_InverseDifferenceMoment_OrigGray_3_02_256	-0.0620041	0.294983	0.670125
Total_Texture_InverseDifferenceMoment_OrigGray_3_03_256	-0.0730778	0.216964	0.600297
Total_Texture_SumAverage_Eosin_3_00_256	-0.0726098	0.219929	0.601442
Total_Texture_SumAverage_Eosin_3_01_256	-0.0726682	0.219557	0.601348
Total_Texture_SumAverage_Eosin_3_02_256	-0.0728098	0.218658	0.600832
Total_Texture_SumAverage_Eosin_3_03_256	-0.0727327	0.219148	0.600832
Total_Texture_SumAverage_Hematoxylin_3_00_256	0.178541	0.00242998	0.101811
Total_Texture_SumAverage_Hematoxylin_3_01_256	0.178853	0.00238719	0.101811
Total_Texture_SumAverage_Hematoxylin_3_02_256	0.178647	0.0024154	0.101811
Total_Texture_SumAverage_Hematoxylin_3_03_256	0.178853	0.00238719	0.101811
Total_Texture_SumAverage_OrigGray_3_00_256	-0.0911375	0.123407	0.489894
Total_Texture_SumAverage_OrigGray_3_01_256	-0.0916964	0.121116	0.489894
Total_Texture_SumAverage_OrigGray_3_02_256	-0.0912396	0.122986	0.489894
Total_Texture_SumAverage_OrigGray_3_03_256	-0.0916964	0.121116	0.489894
Total_Texture_SumEntropy_Eosin_3_00_256	-0.0339726	0.566303	0.84033
Total_Texture_SumEntropy_Eosin_3_01_256	-0.0393773	0.506182	0.808523
Total_Texture_SumEntropy_Eosin_3_02_256	-0.0334274	0.572552	0.842087
Total_Texture_SumEntropy_Eosin_3_03_256	-0.040127	0.498115	0.80207
Total_Texture_SumEntropy_Hematoxylin_3_00_256	0.0425855	0.472146	0.785692
Total_Texture_SumEntropy_Hematoxylin_3_01_256	0.0361194	0.542019	0.830269
Total_Texture_SumEntropy_Hematoxylin_3_02_256	0.0455738	0.441605	0.771602
Total_Texture_SumEntropy_Hematoxylin_3_03_256	0.0358833	0.544664	0.831341
Total_Texture_SumEntropy_OrigGray_3_00_256	-0.0149373	0.800952	0.943633
Total_Texture_SumEntropy_OrigGray_3_01_256	-0.0103423	0.86143	0.966208
Total_Texture_SumEntropy_OrigGray_3_02_256	-0.0100687	0.86506	0.966208
Total_Texture_SumEntropy_OrigGray_3_03_256	-0.0132073	0.823603	0.95182
Total_Texture_SumVariance_Eosin_3_00_256	-0.162244	0.0059198	0.151737
Total_Texture_SumVariance_Eosin_3_01_256	-0.16249	0.00584412	0.151248
Total_Texture_SumVariance_Eosin_3_02_256	-0.16076	0.00639582	0.152002
Total_Texture_SumVariance_Eosin_3_03_256	-0.164007	0.00539586	0.149537
Total_Texture_SumVariance_Hematoxylin_3_00_256	-0.0320147	0.588894	0.848775
Total_Texture_SumVariance_Hematoxylin_3_01_256	-0.0198496	0.737596	0.917041
Total_Texture_SumVariance_Hematoxylin_3_02_256	-0.0257578	0.663718	0.885718
Total_Texture_SumVariance_Hematoxylin_3_03_256	-0.0231968	0.695393	0.898171
Total_Texture_SumVariance_OrigGray_3_00_256	-0.0655838	0.267943	0.642262
Total_Texture_SumVariance_OrigGray_3_01_256	-0.0601507	0.309674	0.678999
Total_Texture_SumVariance_OrigGray_3_02_256	-0.0598436	0.312154	0.678999
Total_Texture_SumVariance_OrigGray_3_03_256	-0.0626102	0.290281	0.667254
Total_Texture_Variance_Eosin_3_00_256	-0.145039	0.0139784	0.228207
Total_Texture_Variance_Eosin_3_01_256	-0.145782	0.0134925	0.222176
Total_Texture_Variance_Eosin_3_02_256	-0.145816	0.0134703	0.222176
Total_Texture_Variance_Eosin_3_03_256	-0.145782	0.0134925	0.222176
Total_Texture_Variance_Hematoxylin_3_00_256	-0.0100519	0.865282	0.966208
Total_Texture_Variance_Hematoxylin_3_01_256	-0.00997681	0.86628	0.966208
Total_Texture_Variance_Hematoxylin_3_02_256	-0.0100936	0.86473	0.966208
Total_Texture_Variance_Hematoxylin_3_03_256	-0.00997681	0.86628	0.966208
Total_Texture_Variance_OrigGray_3_00_256	-0.0340285	0.565665	0.840298
Total_Texture_Variance_OrigGray_3_01_256	-0.0342935	0.562641	0.839397
Total_Texture_Variance_OrigGray_3_02_256	-0.0346092	0.559048	0.838383
Total_Texture_Variance_OrigGray_3_03_256	-0.0342935	0.562641	0.839397
Object_Mean_IdentifyPrimryObjects_AreaShape_Area	0.0435175	0.462498	0.780634
Object_Mean_IdentifyPrimryObjects_AreaShape_BoundingBoxArea	0.064062	0.279224	0.65123
Object_Mean_IdentifyPrimryObjects_AreaShape_BoundingBoxMaximum_X	0.0773271	0.191351	0.581545
Object_Mean_IdentifyPrimryObjects_AreaShape_BoundingBoxMaximum_Y	0.0193582	0.743862	0.917041
Object_Mean_IdentifyPrimryObjects_AreaShape_BoundingBoxMinimum_X	0.0755449	0.20181	0.588599
Object_Mean_IdentifyPrimryObjects_AreaShape_BoundingBoxMinimum_Y	0.00838186	0.887503	0.971845
Object_Mean_IdentifyPrimryObjects_AreaShape_Center_X	0.0763601	0.196976	0.585281
Object_Mean_IdentifyPrimryObjects_AreaShape_Center_Y	0.0140611	0.812404	0.947204
Object_Mean_IdentifyPrimryObjects_AreaShape_Compactness	0.0857293	0.147354	0.529814
Object_Mean_IdentifyPrimryObjects_AreaShape_ConvexArea	0.0522765	0.377363	0.723546
Object_Mean_IdentifyPrimryObjects_AreaShape_Eccentricity	0.0915071	0.121888	0.489894
Object_Mean_IdentifyPrimryObjects_AreaShape_EquivalentDiameter	0.0359366	0.544066	0.830932
Object_Mean_IdentifyPrimryObjects_AreaShape_EulerNumber	-0.00557319	0.925062	0.981814
Object_Mean_IdentifyPrimryObjects_AreaShape_Extent	-0.0875654	0.138856	0.514696
Object_Mean_IdentifyPrimryObjects_AreaShape_FormFactor	-0.0802602	0.175013	0.560831
Object_Mean_IdentifyPrimryObjects_AreaShape_MajorAxisLength	0.0616812	0.297508	0.673048
Object_Mean_IdentifyPrimryObjects_AreaShape_MaxFeretDiameter	0.069562	0.239943	0.616565
Object_Mean_IdentifyPrimryObjects_AreaShape_MaximumRadius	-0.00470211	0.936748	0.982832
Object_Mean_IdentifyPrimryObjects_AreaShape_MeanRadius	-0.000546709	0.992641	0.997628
Object_Mean_IdentifyPrimryObjects_AreaShape_MedianRadius	-0.0688966	0.244478	0.618558
Object_Mean_IdentifyPrimryObjects_AreaShape_MinFeretDiameter	0.0262715	0.657434	0.882725
Object_Mean_IdentifyPrimryObjects_AreaShape_MinorAxisLength	0.0109479	0.853404	0.966103
Object_Mean_IdentifyPrimryObjects_AreaShape_Orientation	0.00901334	0.879089	0.968174
Object_Mean_IdentifyPrimryObjects_AreaShape_Perimeter	0.0591152	0.318089	0.681047
Object_Mean_IdentifyPrimryObjects_AreaShape_Solidity	-0.0717646	0.225355	0.603996
Object_Mean_IdentifyPrimryObjects_AreaShape_Zernike_0_0	-0.0936365	0.113418	0.480745
Object_Mean_IdentifyPrimryObjects_AreaShape_Zernike_1_1	-0.201792	0.000597579	0.073801
Object_Mean_IdentifyPrimryObjects_AreaShape_Zernike_2_0	0.273612	2.77922e-06	0.00755115
Object_Mean_IdentifyPrimryObjects_AreaShape_Zernike_2_2	-0.00379752	0.948899	0.98635
Object_Mean_IdentifyPrimryObjects_AreaShape_Zernike_3_1	-0.0799653	0.176607	0.563195
Object_Mean_IdentifyPrimryObjects_AreaShape_Zernike_3_3	0.0918786	0.120376	0.489894
Object_Mean_IdentifyPrimryObjects_AreaShape_Zernike_4_0	-0.00935193	0.874584	0.968174
Object_Mean_IdentifyPrimryObjects_AreaShape_Zernike_4_2	-0.0568293	0.337187	0.700596
Object_Mean_IdentifyPrimryObjects_AreaShape_Zernike_4_4	0.0149175	0.80121	0.943633
Object_Mean_IdentifyPrimryObjects_AreaShape_Zernike_5_1	-0.023838	0.687411	0.896207
Object_Mean_IdentifyPrimryObjects_AreaShape_Zernike_5_3	0.00508993	0.931543	0.98217
Object_Mean_IdentifyPrimryObjects_AreaShape_Zernike_5_5	0.0249806	0.673271	0.8892
Object_Mean_IdentifyPrimryObjects_AreaShape_Zernike_6_0	-0.0132104	0.823563	0.95182
Object_Mean_IdentifyPrimryObjects_AreaShape_Zernike_6_2	-0.0496379	0.401938	0.742544
Object_Mean_IdentifyPrimryObjects_AreaShape_Zernike_6_4	-0.0379372	0.521869	0.817506
Object_Mean_IdentifyPrimryObjects_AreaShape_Zernike_6_6	-0.00127667	0.982812	0.992543
Object_Mean_IdentifyPrimryObjects_AreaShape_Zernike_7_1	-0.0163825	0.782156	0.932018
Object_Mean_IdentifyPrimryObjects_AreaShape_Zernike_7_3	0.000450769	0.993933	0.997974
Object_Mean_IdentifyPrimryObjects_AreaShape_Zernike_7_5	-0.00316604	0.957388	0.98635
Object_Mean_IdentifyPrimryObjects_AreaShape_Zernike_7_7	-0.00229496	0.969106	0.989563
Object_Mean_IdentifyPrimryObjects_AreaShape_Zernike_8_0	-0.0278604	0.63815	0.871805
Object_Mean_IdentifyPrimryObjects_AreaShape_Zernike_8_2	-0.0351498	0.552922	0.837682
Object_Mean_IdentifyPrimryObjects_AreaShape_Zernike_8_4	-0.0282944	0.632924	0.869746
Object_Mean_IdentifyPrimryObjects_AreaShape_Zernike_8_6	-0.0329366	0.578206	0.842796
Object_Mean_IdentifyPrimryObjects_AreaShape_Zernike_8_8	-0.0106103	0.857876	0.966208
Object_Mean_IdentifyPrimryObjects_AreaShape_Zernike_9_1	-0.0158718	0.788784	0.934379
Object_Mean_IdentifyPrimryObjects_AreaShape_Zernike_9_3	0.00300259	0.959586	0.98635
Object_Mean_IdentifyPrimryObjects_AreaShape_Zernike_9_5	-0.0121088	0.838063	0.958744
Object_Mean_IdentifyPrimryObjects_AreaShape_Zernike_9_7	-0.00219242	0.970486	0.990165
Object_Mean_IdentifyPrimryObjects_AreaShape_Zernike_9_9	0.00107413	0.985539	0.993919
Object_Mean_IdentifyPrimryObjects_Intensity_IntegratedIntensityEdge_Hematoxylin	0.0715367	0.226835	0.603996
Object_Mean_IdentifyPrimryObjects_Intensity_IntegratedIntensity_Hematoxylin	0.0519978	0.379914	0.724059
Object_Mean_IdentifyPrimryObjects_Intensity_LowerQuartileIntensity_Hematoxylin	0.0710397	0.230085	0.607522
Object_Mean_IdentifyPrimryObjects_Intensity_MADIntensity_Hematoxylin	-0.00447317	0.939822	0.984386
Object_Mean_IdentifyPrimryObjects_Intensity_MassDisplacement_Hematoxylin	0.0677006	0.252778	0.62664
Object_Mean_IdentifyPrimryObjects_Intensity_MaxIntensityEdge_Hematoxylin	0.075185	0.203972	0.589773
Object_Mean_IdentifyPrimryObjects_Intensity_MaxIntensity_Hematoxylin	0.0687011	0.245821	0.620153
Object_Mean_IdentifyPrimryObjects_Intensity_MeanIntensityEdge_Hematoxylin	0.0762525	0.197609	0.586042
Object_Mean_IdentifyPrimryObjects_Intensity_MeanIntensity_Hematoxylin	0.0742474	0.209681	0.597174
Object_Mean_IdentifyPrimryObjects_Intensity_MedianIntensity_Hematoxylin	0.0738489	0.212143	0.599159
Object_Mean_IdentifyPrimryObjects_Intensity_MinIntensityEdge_Hematoxylin	0.0690443	0.243466	0.617368
Object_Mean_IdentifyPrimryObjects_Intensity_MinIntensity_Hematoxylin	0.0693565	0.241337	0.617368
Object_Mean_IdentifyPrimryObjects_Intensity_StdIntensityEdge_Hematoxylin	-0.0232542	0.694677	0.898171
Object_Mean_IdentifyPrimryObjects_Intensity_StdIntensity_Hematoxylin	-0.0252009	0.670557	0.889095
Object_Mean_IdentifyPrimryObjects_Intensity_UpperQuartileIntensity_Hematoxylin	0.0784297	0.185083	0.570796
Object_Mean_IdentifyPrimryObjects_Location_CenterMassIntensity_X_Hematoxylin	0.0763418	0.197083	0.585281
Object_Mean_IdentifyPrimryObjects_Location_CenterMassIntensity_Y_Hematoxylin	0.0140434	0.812637	0.947204
Object_Mean_IdentifyPrimryObjects_Location_Center_X	0.0763601	0.196976	0.585281
Object_Mean_IdentifyPrimryObjects_Location_Center_Y	0.0140611	0.812404	0.947204
Object_Mean_IdentifyPrimryObjects_Location_MaxIntensity_X_Hematoxylin	0.0766393	0.19534	0.584779
Object_Mean_IdentifyPrimryObjects_Location_MaxIntensity_Y_Hematoxylin	0.0146089	0.80524	0.944064
Object_Mean_IdentifyPrimryObjects_Texture_AngularSecondMoment_Hematoxylin_1_00_16	0.108229	0.0671382	0.389643
Object_Mean_IdentifyPrimryObjects_Texture_AngularSecondMoment_Hematoxylin_1_01_16	0.0995397	0.0923404	0.442845
Object_Mean_IdentifyPrimryObjects_Texture_AngularSecondMoment_Hematoxylin_1_02_16	0.108974	0.0652704	0.389643
Object_Mean_IdentifyPrimryObjects_Texture_AngularSecondMoment_Hematoxylin_1_03_16	0.104153	0.078153	0.41263
Object_Mean_IdentifyPrimryObjects_Texture_Contrast_Hematoxylin_1_00_16	-0.0829887	0.160767	0.544643
Object_Mean_IdentifyPrimryObjects_Texture_Contrast_Hematoxylin_1_01_16	-0.0652823	0.270153	0.645211
Object_Mean_IdentifyPrimryObjects_Texture_Contrast_Hematoxylin_1_02_16	-0.0896416	0.129706	0.497755
Object_Mean_IdentifyPrimryObjects_Texture_Contrast_Hematoxylin_1_03_16	-0.0607807	0.304628	0.675782
Object_Mean_IdentifyPrimryObjects_Texture_Correlation_Hematoxylin_1_00_16	0.167622	0.00444968	0.13332
Object_Mean_IdentifyPrimryObjects_Texture_Correlation_Hematoxylin_1_01_16	0.139317	0.0182693	0.254553
Object_Mean_IdentifyPrimryObjects_Texture_Correlation_Hematoxylin_1_02_16	0.134871	0.0223571	0.266053
Object_Mean_IdentifyPrimryObjects_Texture_Correlation_Hematoxylin_1_03_16	0.137656	0.0197137	0.25738
Object_Mean_IdentifyPrimryObjects_Texture_DifferenceEntropy_Hematoxylin_1_00_16	-0.0870024	0.141421	0.518543
Object_Mean_IdentifyPrimryObjects_Texture_DifferenceEntropy_Hematoxylin_1_01_16	-0.0672006	0.256305	0.628046
Object_Mean_IdentifyPrimryObjects_Texture_DifferenceEntropy_Hematoxylin_1_02_16	-0.0875938	0.138728	0.514696
Object_Mean_IdentifyPrimryObjects_Texture_DifferenceEntropy_Hematoxylin_1_03_16	-0.0714575	0.22735	0.603996
Object_Mean_IdentifyPrimryObjects_Texture_DifferenceVariance_Hematoxylin_1_00_16	0.0432037	0.465733	0.784013
Object_Mean_IdentifyPrimryObjects_Texture_DifferenceVariance_Hematoxylin_1_01_16	0.033566	0.57096	0.842087
Object_Mean_IdentifyPrimryObjects_Texture_DifferenceVariance_Hematoxylin_1_02_16	0.05048	0.393992	0.735218
Object_Mean_IdentifyPrimryObjects_Texture_DifferenceVariance_Hematoxylin_1_03_16	0.0358036	0.545558	0.831341
Object_Mean_IdentifyPrimryObjects_Texture_Entropy_Hematoxylin_1_00_16	-0.0998163	0.0914352	0.441611
Object_Mean_IdentifyPrimryObjects_Texture_Entropy_Hematoxylin_1_01_16	-0.0957087	0.105627	0.462884
Object_Mean_IdentifyPrimryObjects_Texture_Entropy_Hematoxylin_1_02_16	-0.102202	0.0839204	0.424704
Object_Mean_IdentifyPrimryObjects_Texture_Entropy_Hematoxylin_1_03_16	-0.0985859	0.0955164	0.451336
Object_Mean_IdentifyPrimryObjects_Texture_InfoMeas1_Hematoxylin_1_00_16	0.00211628	0.97151	0.990462
Object_Mean_IdentifyPrimryObjects_Texture_InfoMeas1_Hematoxylin_1_01_16	0.0480241	0.417427	0.752997
Object_Mean_IdentifyPrimryObjects_Texture_InfoMeas1_Hematoxylin_1_02_16	-0.0164993	0.780643	0.931929
Object_Mean_IdentifyPrimryObjects_Texture_InfoMeas1_Hematoxylin_1_03_16	0.04312	0.466599	0.784239
Object_Mean_IdentifyPrimryObjects_Texture_InfoMeas2_Hematoxylin_1_00_16	-0.0285091	0.630345	0.869746
Object_Mean_IdentifyPrimryObjects_Texture_InfoMeas2_Hematoxylin_1_01_16	-0.0586218	0.322151	0.683452
Object_Mean_IdentifyPrimryObjects_Texture_InfoMeas2_Hematoxylin_1_02_16	-0.0263009	0.657074	0.882725
Object_Mean_IdentifyPrimryObjects_Texture_InfoMeas2_Hematoxylin_1_03_16	-0.0565471	0.339595	0.702191
Object_Mean_IdentifyPrimryObjects_Texture_InverseDifferenceMoment_Hematoxylin_1_00_16	0.115333	0.0509971	0.359894
Object_Mean_IdentifyPrimryObjects_Texture_InverseDifferenceMoment_Hematoxylin_1_01_16	0.108056	0.0675786	0.389643
Object_Mean_IdentifyPrimryObjects_Texture_InverseDifferenceMoment_Hematoxylin_1_02_16	0.115368	0.0509263	0.359894
Object_Mean_IdentifyPrimryObjects_Texture_InverseDifferenceMoment_Hematoxylin_1_03_16	0.101335	0.0865916	0.430785
Object_Mean_IdentifyPrimryObjects_Texture_SumAverage_Hematoxylin_1_00_16	0.0767368	0.194771	0.584779
Object_Mean_IdentifyPrimryObjects_Texture_SumAverage_Hematoxylin_1_01_16	0.0786307	0.183957	0.568666
Object_Mean_IdentifyPrimryObjects_Texture_SumAverage_Hematoxylin_1_02_16	0.0761165	0.198412	0.586042
Object_Mean_IdentifyPrimryObjects_Texture_SumAverage_Hematoxylin_1_03_16	0.0784627	0.184898	0.570796
Object_Mean_IdentifyPrimryObjects_Texture_SumEntropy_Hematoxylin_1_00_16	-0.0441434	0.456082	0.7803
Object_Mean_IdentifyPrimryObjects_Texture_SumEntropy_Hematoxylin_1_01_16	-0.0298452	0.614401	0.862718
Object_Mean_IdentifyPrimryObjects_Texture_SumEntropy_Hematoxylin_1_02_16	-0.0407941	0.490995	0.796913
Object_Mean_IdentifyPrimryObjects_Texture_SumEntropy_Hematoxylin_1_03_16	-0.0334056	0.572803	0.842087
Object_Mean_IdentifyPrimryObjects_Texture_SumVariance_Hematoxylin_1_00_16	0.0306751	0.604586	0.857338
Object_Mean_IdentifyPrimryObjects_Texture_SumVariance_Hematoxylin_1_01_16	0.0332366	0.574747	0.842665
Object_Mean_IdentifyPrimryObjects_Texture_SumVariance_Hematoxylin_1_02_16	0.0345117	0.560156	0.838383
Object_Mean_IdentifyPrimryObjects_Texture_SumVariance_Hematoxylin_1_03_16	0.0317305	0.592208	0.84954
Object_Mean_IdentifyPrimryObjects_Texture_Variance_Hematoxylin_1_00_16	-0.0102113	0.863167	0.966208
Object_Mean_IdentifyPrimryObjects_Texture_Variance_Hematoxylin_1_01_16	-0.0138226	0.815529	0.949845
Object_Mean_IdentifyPrimryObjects_Texture_Variance_Hematoxylin_1_02_16	-0.0100535	0.865262	0.966208
Object_Mean_IdentifyPrimryObjects_Texture_Variance_Hematoxylin_1_03_16	-0.0137119	0.81698	0.949845
Object_Median_IdentifyPrimryObjects_AreaShape_Area	0.0121326	0.837846	0.958744
Object_Median_IdentifyPrimryObjects_AreaShape_BoundingBoxArea	0.000147723	0.998012	0.998301
Object_Median_IdentifyPrimryObjects_AreaShape_BoundingBoxMaximum_X	0.0855668	0.1482	0.529814
Object_Median_IdentifyPrimryObjects_AreaShape_BoundingBoxMaximum_Y	0.0101833	0.863621	0.966208
Object_Median_IdentifyPrimryObjects_AreaShape_BoundingBoxMinimum_X	0.0856274	0.147911	0.529814
Object_Median_IdentifyPrimryObjects_AreaShape_BoundingBoxMinimum_Y	0.00190309	0.974392	0.991173
Object_Median_IdentifyPrimryObjects_AreaShape_Center_X	0.0864197	0.144113	0.523158
Object_Median_IdentifyPrimryObjects_AreaShape_Center_Y	0.00672397	0.909648	0.977269
Object_Median_IdentifyPrimryObjects_AreaShape_Compactness	0.0673645	0.255145	0.628046
Object_Median_IdentifyPrimryObjects_AreaShape_ConvexArea	0.00193946	0.973903	0.991173
Object_Median_IdentifyPrimryObjects_AreaShape_Eccentricity	0.070156	0.235945	0.612557
Object_Median_IdentifyPrimryObjects_AreaShape_EquivalentDiameter	0.0126302	0.831293	0.956831
Object_Median_IdentifyPrimryObjects_AreaShape_Extent	-0.0981452	0.0970126	0.453265
Object_Median_IdentifyPrimryObjects_AreaShape_FormFactor	-0.0702428	0.235365	0.612373
Object_Median_IdentifyPrimryObjects_AreaShape_MajorAxisLength	-0.00607167	0.918381	0.979388
Object_Median_IdentifyPrimryObjects_AreaShape_MaxFeretDiameter	-0.00168785	0.977288	0.991718
Object_Median_IdentifyPrimryObjects_AreaShape_MaximumRadius	0.055872	0.345611	0.707097
Object_Median_IdentifyPrimryObjects_AreaShape_MeanRadius	0.0438789	0.458787	0.7803
Object_Median_IdentifyPrimryObjects_AreaShape_MedianRadius	-0.0453208	0.444375	0.773538
Object_Median_IdentifyPrimryObjects_AreaShape_MinFeretDiameter	0.00965065	0.87069	0.968168
Object_Median_IdentifyPrimryObjects_AreaShape_MinorAxisLength	0.0137119	0.81698	0.949845
Object_Median_IdentifyPrimryObjects_AreaShape_Orientation	0.0126098	0.83146	0.956831
Object_Median_IdentifyPrimryObjects_AreaShape_Perimeter	0.00423231	0.94309	0.985511
Object_Median_IdentifyPrimryObjects_AreaShape_Solidity	-0.103451	0.0801904	0.415
Object_Median_IdentifyPrimryObjects_AreaShape_Zernike_0_0	-0.0939096	0.112366	0.480364
Object_Median_IdentifyPrimryObjects_AreaShape_Zernike_1_1	-0.187272	0.00146177	0.0932015
Object_Median_IdentifyPrimryObjects_AreaShape_Zernike_2_0	0.224431	0.000130693	0.0394547
Object_Median_IdentifyPrimryObjects_AreaShape_Zernike_2_2	0.036327	0.539698	0.829389
Object_Median_IdentifyPrimryObjects_AreaShape_Zernike_3_1	-0.154514	0.00879791	0.177066
Object_Median_IdentifyPrimryObjects_AreaShape_Zernike_3_3	0.0741367	0.210363	0.598057
Object_Median_IdentifyPrimryObjects_AreaShape_Zernike_4_0	-0.0142287	0.810211	0.946407
Object_Median_IdentifyPrimryObjects_AreaShape_Zernike_4_2	-0.0809551	0.171298	0.557877
Object_Median_IdentifyPrimryObjects_AreaShape_Zernike_4_4	0.0408169	0.490752	0.796913
Object_Median_IdentifyPrimryObjects_AreaShape_Zernike_5_1	-0.0697301	0.238807	0.615013
Object_Median_IdentifyPrimryObjects_AreaShape_Zernike_5_3	-0.0467053	0.430343	0.762528
Object_Median_IdentifyPrimryObjects_AreaShape_Zernike_5_5	-0.00632244	0.915023	0.979091
Object_Median_IdentifyPrimryObjects_AreaShape_Zernike_6_0	-0.0282005	0.634053	0.869746
Object_Median_IdentifyPrimryObjects_AreaShape_Zernike_6_2	-0.0716479	0.226112	0.603996
Object_Median_IdentifyPrimryObjects_AreaShape_Zernike_6_4	-0.05894	0.319527	0.68144
Object_Median_IdentifyPrimryObjects_AreaShape_Zernike_6_6	-0.00920523	0.876536	0.968174
Object_Median_IdentifyPrimryObjects_AreaShape_Zernike_7_1	-0.0628695	0.288284	0.663787
Object_Median_IdentifyPrimryObjects_AreaShape_Zernike_7_3	-0.0567583	0.337792	0.700596
Object_Median_IdentifyPrimryObjects_AreaShape_Zernike_7_5	-0.0593634	0.316059	0.680267
Object_Median_IdentifyPrimryObjects_AreaShape_Zernike_7_7	-0.0454287	0.443062	0.773154
Object_Median_IdentifyPrimryObjects_AreaShape_Zernike_8_0	-0.043823	0.459359	0.7803
Object_Median_IdentifyPrimryObjects_AreaShape_Zernike_8_2	-0.0403509	0.495719	0.799803
Object_Median_IdentifyPrimryObjects_AreaShape_Zernike_8_4	-0.0564933	0.340055	0.702608
Object_Median_IdentifyPrimryObjects_AreaShape_Zernike_8_6	-0.0477038	0.420543	0.753447
Object_Median_IdentifyPrimryObjects_AreaShape_Zernike_8_8	-0.023211	0.695215	0.898171
Object_Median_IdentifyPrimryObjects_AreaShape_Zernike_9_1	-0.0654498	0.268924	0.643273
Object_Median_IdentifyPrimryObjects_AreaShape_Zernike_9_3	-0.0482348	0.415386	0.752904
Object_Median_IdentifyPrimryObjects_AreaShape_Zernike_9_5	-0.0607421	0.304935	0.675782
Object_Median_IdentifyPrimryObjects_AreaShape_Zernike_9_7	-0.06077	0.304713	0.675782
Object_Median_IdentifyPrimryObjects_AreaShape_Zernike_9_9	-0.0529191	0.37152	0.718279
Object_Median_IdentifyPrimryObjects_Intensity_IntegratedIntensityEdge_Hematoxylin	0.0477008	0.420573	0.753447
Object_Median_IdentifyPrimryObjects_Intensity_IntegratedIntensity_Hematoxylin	0.0520785	0.379174	0.724059
Object_Median_IdentifyPrimryObjects_Intensity_LowerQuartileIntensity_Hematoxylin	0.0754073	0.202634	0.588874
Object_Median_IdentifyPrimryObjects_Intensity_MADIntensity_Hematoxylin	-0.0209557	0.723555	0.914244
Object_Median_IdentifyPrimryObjects_Intensity_MassDisplacement_Hematoxylin	0.0182308	0.758303	0.920769
Object_Median_IdentifyPrimryObjects_Intensity_MaxIntensityEdge_Hematoxylin	0.0650823	0.271626	0.645336
Object_Median_IdentifyPrimryObjects_Intensity_MaxIntensity_Hematoxylin	0.0538623	0.363047	0.71686
Object_Median_IdentifyPrimryObjects_Intensity_MeanIntensityEdge_Hematoxylin	0.0780744	0.187087	0.575184
Object_Median_IdentifyPrimryObjects_Intensity_MeanIntensity_Hematoxylin	0.0708849	0.231104	0.609127
Object_Median_IdentifyPrimryObjects_Intensity_MedianIntensity_Hematoxylin	0.0650508	0.271858	0.645336
Object_Median_IdentifyPrimryObjects_Intensity_MinIntensityEdge_Hematoxylin	0.0775784	0.189909	0.580409
Object_Median_IdentifyPrimryObjects_Intensity_MinIntensity_Hematoxylin	0.0781835	0.18647	0.574419
Object_Median_IdentifyPrimryObjects_Intensity_StdIntensityEdge_Hematoxylin	-0.0346742	0.55831	0.838383
Object_Median_IdentifyPrimryObjects_Intensity_StdIntensity_Hematoxylin	-0.0373077	0.528803	0.822414
Object_Median_IdentifyPrimryObjects_Intensity_UpperQuartileIntensity_Hematoxylin	0.066426	0.261837	0.633492
Object_Median_IdentifyPrimryObjects_Location_CenterMassIntensity_X_Hematoxylin	0.0865598	0.143462	0.523138
Object_Median_IdentifyPrimryObjects_Location_CenterMassIntensity_Y_Hematoxylin	0.0071458	0.904006	0.975063
Object_Median_IdentifyPrimryObjects_Location_Center_X	0.0864197	0.144113	0.523158
Object_Median_IdentifyPrimryObjects_Location_Center_Y	0.00672397	0.909648	0.977269
Object_Median_IdentifyPrimryObjects_Location_MaxIntensity_X_Hematoxylin	0.0846576	0.152573	0.537933
Object_Median_IdentifyPrimryObjects_Location_MaxIntensity_Y_Hematoxylin	0.00747506	0.899665	0.974249
Object_Median_IdentifyPrimryObjects_Texture_AngularSecondMoment_Hematoxylin_1_00_16	0.106414	0.0718752	0.396981
Object_Median_IdentifyPrimryObjects_Texture_AngularSecondMoment_Hematoxylin_1_01_16	0.104136	0.0782026	0.41263
Object_Median_IdentifyPrimryObjects_Texture_AngularSecondMoment_Hematoxylin_1_02_16	0.107255	0.0696474	0.395081
Object_Median_IdentifyPrimryObjects_Texture_AngularSecondMoment_Hematoxylin_1_03_16	0.103745	0.0793323	0.414526
Object_Median_IdentifyPrimryObjects_Texture_Contrast_Hematoxylin_1_00_16	-0.0940498	0.11183	0.480002
Object_Median_IdentifyPrimryObjects_Texture_Contrast_Hematoxylin_1_01_16	-0.0792038	0.180773	0.566867
Object_Median_IdentifyPrimryObjects_Texture_Contrast_Hematoxylin_1_02_16	-0.095929	0.104824	0.462348
Object_Median_IdentifyPrimryObjects_Texture_Contrast_Hematoxylin_1_03_16	-0.0791708	0.180956	0.566867
Object_Median_IdentifyPrimryObjects_Texture_Correlation_Hematoxylin_1_00_16	0.166776	0.00465652	0.136041
Object_Median_IdentifyPrimryObjects_Texture_Correlation_Hematoxylin_1_01_16	0.121207	0.0402243	0.338577
Object_Median_IdentifyPrimryObjects_Texture_Correlation_Hematoxylin_1_02_16	0.130494	0.0271313	0.293772
Object_Median_IdentifyPrimryObjects_Texture_Correlation_Hematoxylin_1_03_16	0.122404	0.038282	0.332812
Object_Median_IdentifyPrimryObjects_Texture_DifferenceEntropy_Hematoxylin_1_00_16	-0.0902593	0.127075	0.494006
Object_Median_IdentifyPrimryObjects_Texture_DifferenceEntropy_Hematoxylin_1_01_16	-0.0796191	0.178493	0.564943
Object_Median_IdentifyPrimryObjects_Texture_DifferenceEntropy_Hematoxylin_1_02_16	-0.0921898	0.119121	0.489894
Object_Median_IdentifyPrimryObjects_Texture_DifferenceEntropy_Hematoxylin_1_03_16	-0.0796795	0.178163	0.56484
Object_Median_IdentifyPrimryObjects_Texture_DifferenceVariance_Hematoxylin_1_00_16	0.0716093	0.226363	0.603996
Object_Median_IdentifyPrimryObjects_Texture_DifferenceVariance_Hematoxylin_1_01_16	0.060966	0.303154	0.675782
Object_Median_IdentifyPrimryObjects_Texture_DifferenceVariance_Hematoxylin_1_02_16	0.0705032	0.233631	0.610927
Object_Median_IdentifyPrimryObjects_Texture_DifferenceVariance_Hematoxylin_1_03_16	0.0601055	0.310038	0.678999
Object_Median_IdentifyPrimryObjects_Texture_Entropy_Hematoxylin_1_00_16	-0.110076	0.0625835	0.382107
Object_Median_IdentifyPrimryObjects_Texture_Entropy_Hematoxylin_1_01_16	-0.108234	0.0671266	0.389643
Object_Median_IdentifyPrimryObjects_Texture_Entropy_Hematoxylin_1_02_16	-0.108807	0.0656855	0.389643
Object_Median_IdentifyPrimryObjects_Texture_Entropy_Hematoxylin_1_03_16	-0.110653	0.0612149	0.381137
Object_Median_IdentifyPrimryObjects_Texture_InfoMeas1_Hematoxylin_1_00_16	-0.0388392	0.512014	0.811162
Object_Median_IdentifyPrimryObjects_Texture_InfoMeas1_Hematoxylin_1_01_16	0.0198846	0.73715	0.917041
Object_Median_IdentifyPrimryObjects_Texture_InfoMeas1_Hematoxylin_1_02_16	-0.0448992	0.4484	0.774016
Object_Median_IdentifyPrimryObjects_Texture_InfoMeas1_Hematoxylin_1_03_16	0.01565	0.791668	0.936422
Object_Median_IdentifyPrimryObjects_Texture_InfoMeas2_Hematoxylin_1_00_16	0.00176703	0.976211	0.991702
Object_Median_IdentifyPrimryObjects_Texture_InfoMeas2_Hematoxylin_1_01_16	-0.0319995	0.589071	0.848775
Object_Median_IdentifyPrimryObjects_Texture_InfoMeas2_Hematoxylin_1_02_16	-0.000198988	0.997324	0.998301
Object_Median_IdentifyPrimryObjects_Texture_InfoMeas2_Hematoxylin_1_03_16	-0.0318594	0.590704	0.849169
Object_Median_IdentifyPrimryObjects_Texture_InverseDifferenceMoment_Hematoxylin_1_00_16	0.112635	0.0566986	0.368039
Object_Median_IdentifyPrimryObjects_Texture_InverseDifferenceMoment_Hematoxylin_1_01_16	0.102014	0.0844934	0.42495
Object_Median_IdentifyPrimryObjects_Texture_InverseDifferenceMoment_Hematoxylin_1_02_16	0.114594	0.0525092	0.360899
Object_Median_IdentifyPrimryObjects_Texture_InverseDifferenceMoment_Hematoxylin_1_03_16	0.0964097	0.103089	0.45984
Object_Median_IdentifyPrimryObjects_Texture_SumAverage_Hematoxylin_1_00_16	0.0701067	0.236275	0.612557
Object_Median_IdentifyPrimryObjects_Texture_SumAverage_Hematoxylin_1_01_16	0.0705641	0.233226	0.610927
Object_Median_IdentifyPrimryObjects_Texture_SumAverage_Hematoxylin_1_02_16	0.0702184	0.235528	0.612373
Object_Median_IdentifyPrimryObjects_Texture_SumAverage_Hematoxylin_1_03_16	0.0713844	0.227827	0.603996
Object_Median_IdentifyPrimryObjects_Texture_SumEntropy_Hematoxylin_1_00_16	-0.0615731	0.298357	0.673846
Object_Median_IdentifyPrimryObjects_Texture_SumEntropy_Hematoxylin_1_01_16	-0.0466566	0.430824	0.762573
Object_Median_IdentifyPrimryObjects_Texture_SumEntropy_Hematoxylin_1_02_16	-0.055477	0.348823	0.708542
Object_Median_IdentifyPrimryObjects_Texture_SumEntropy_Hematoxylin_1_03_16	-0.0522861	0.377275	0.723546
Object_Median_IdentifyPrimryObjects_Texture_SumVariance_Hematoxylin_1_00_16	-0.00344067	0.953695	0.98635
Object_Median_IdentifyPrimryObjects_Texture_SumVariance_Hematoxylin_1_01_16	-0.00683564	0.908154	0.97721
Object_Median_IdentifyPrimryObjects_Texture_SumVariance_Hematoxylin_1_02_16	0.00163708	0.97796	0.991718
Object_Median_IdentifyPrimryObjects_Texture_SumVariance_Hematoxylin_1_03_16	-0.00469145	0.936892	0.982832
Object_Median_IdentifyPrimryObjects_Texture_Variance_Hematoxylin_1_00_16	-0.0348813	0.555961	0.838261
Object_Median_IdentifyPrimryObjects_Texture_Variance_Hematoxylin_1_01_16	-0.0386133	0.514473	0.81177
Object_Median_IdentifyPrimryObjects_Texture_Variance_Hematoxylin_1_02_16	-0.0331807	0.57539	0.842665
Object_Median_IdentifyPrimryObjects_Texture_Variance_Hematoxylin_1_03_16	-0.0405067	0.494055	0.798442
Object_StDev_IdentifyPrimryObjects_AreaShape_Area	0.0732134	0.216111	0.600297
Object_StDev_IdentifyPrimryObjects_AreaShape_BoundingBoxArea	0.108547	0.0663346	0.389643
Object_StDev_IdentifyPrimryObjects_AreaShape_BoundingBoxMaximum_X	-0.0708174	0.231549	0.609612
Object_StDev_IdentifyPrimryObjects_AreaShape_BoundingBoxMaximum_Y	-0.109424	0.0641631	0.388266
Object_StDev_IdentifyPrimryObjects_AreaShape_BoundingBoxMinimum_X	-0.0691138	0.242991	0.617368
Object_StDev_IdentifyPrimryObjects_AreaShape_BoundingBoxMinimum_Y	-0.107835	0.0681451	0.389643
Object_StDev_IdentifyPrimryObjects_AreaShape_Center_X	-0.0692199	0.242267	0.617368
Object_StDev_IdentifyPrimryObjects_AreaShape_Center_Y	-0.109152	0.0648299	0.388836
Object_StDev_IdentifyPrimryObjects_AreaShape_Compactness	0.114486	0.0527325	0.360899
Object_StDev_IdentifyPrimryObjects_AreaShape_ConvexArea	0.0904847	0.126126	0.492362
Object_StDev_IdentifyPrimryObjects_AreaShape_Eccentricity	-0.135207	0.0220226	0.266053
Object_StDev_IdentifyPrimryObjects_AreaShape_EquivalentDiameter	0.0616137	0.298038	0.673685
Object_StDev_IdentifyPrimryObjects_AreaShape_EulerNumber	0.0212912	0.719314	0.912407
Object_StDev_IdentifyPrimryObjects_AreaShape_Extent	0.0532019	0.368967	0.718279
Object_StDev_IdentifyPrimryObjects_AreaShape_FormFactor	0.0592654	0.316859	0.680267
Object_StDev_IdentifyPrimryObjects_AreaShape_MajorAxisLength	0.142977	0.0154099	0.235459
Object_StDev_IdentifyPrimryObjects_AreaShape_MaxFeretDiameter	0.137259	0.0200726	0.258471
Object_StDev_IdentifyPrimryObjects_AreaShape_MaximumRadius	-0.0559456	0.344763	0.706427
Object_StDev_IdentifyPrimryObjects_AreaShape_MeanRadius	-0.0648158	0.273597	0.646965
Object_StDev_IdentifyPrimryObjects_AreaShape_MedianRadius	-0.0168759	0.775767	0.930498
Object_StDev_IdentifyPrimryObjects_AreaShape_MinFeretDiameter	0.0371686	0.530341	0.822453
Object_StDev_IdentifyPrimryObjects_AreaShape_MinorAxisLength	0.00305487	0.958883	0.98635
Object_StDev_IdentifyPrimryObjects_AreaShape_Orientation	-0.0115971	0.844817	0.961606
Object_StDev_IdentifyPrimryObjects_AreaShape_Perimeter	0.0999788	0.090907	0.441611
Object_StDev_IdentifyPrimryObjects_AreaShape_Solidity	-0.0730961	0.216849	0.600297
Object_StDev_IdentifyPrimryObjects_AreaShape_Zernike_0_0	0.0225658	0.703281	0.904371
Object_StDev_IdentifyPrimryObjects_AreaShape_Zernike_1_1	-0.119851	0.0425232	0.344882
Object_StDev_IdentifyPrimryObjects_AreaShape_Zernike_2_0	-0.057506	0.331458	0.694886
Object_StDev_IdentifyPrimryObjects_AreaShape_Zernike_2_2	-0.0732184	0.216079	0.600297
Object_StDev_IdentifyPrimryObjects_AreaShape_Zernike_3_1	-0.014083	0.812118	0.947204
Object_StDev_IdentifyPrimryObjects_AreaShape_Zernike_3_3	0.0605558	0.306423	0.677987
Object_StDev_IdentifyPrimryObjects_AreaShape_Zernike_4_0	-0.0145947	0.805426	0.944064
Object_StDev_IdentifyPrimryObjects_AreaShape_Zernike_4_2	-0.0340183	0.565781	0.840298
Object_StDev_IdentifyPrimryObjects_AreaShape_Zernike_4_4	-0.0280847	0.635446	0.869746
Object_StDev_IdentifyPrimryObjects_AreaShape_Zernike_5_1	-0.0092037	0.876556	0.968174
Object_StDev_IdentifyPrimryObjects_AreaShape_Zernike_5_3	0.0283751	0.631954	0.869746
Object_StDev_IdentifyPrimryObjects_AreaShape_Zernike_5_5	0.0171475	0.772257	0.927186
Object_StDev_IdentifyPrimryObjects_AreaShape_Zernike_6_0	-0.0108626	0.854534	0.966208
Object_StDev_IdentifyPrimryObjects_AreaShape_Zernike_6_2	-0.0195536	0.741368	0.917041
Object_StDev_IdentifyPrimryObjects_AreaShape_Zernike_6_4	-0.0173353	0.769832	0.92695
Object_StDev_IdentifyPrimryObjects_AreaShape_Zernike_6_6	-0.0180531	0.760586	0.922281
Object_StDev_IdentifyPrimryObjects_AreaShape_Zernike_7_1	-0.0116296	0.844388	0.961606
Object_StDev_IdentifyPrimryObjects_AreaShape_Zernike_7_3	0.0310604	0.600054	0.855376
Object_StDev_IdentifyPrimryObjects_AreaShape_Zernike_7_5	0.0193216	0.744329	0.917041
Object_StDev_IdentifyPrimryObjects_AreaShape_Zernike_7_7	-0.00736357	0.901095	0.974612
Object_StDev_IdentifyPrimryObjects_AreaShape_Zernike_8_0	-0.0100113	0.865822	0.966208
Object_StDev_IdentifyPrimryObjects_AreaShape_Zernike_8_2	-0.0213349	0.718763	0.912407
Object_StDev_IdentifyPrimryObjects_AreaShape_Zernike_8_4	-0.00200663	0.972986	0.990856
Object_StDev_IdentifyPrimryObjects_AreaShape_Zernike_8_6	-0.0387377	0.513119	0.81171
Object_StDev_IdentifyPrimryObjects_AreaShape_Zernike_8_8	-0.0169632	0.774638	0.929634
Object_StDev_IdentifyPrimryObjects_AreaShape_Zernike_9_1	-0.00263761	0.964496	0.987463
Object_StDev_IdentifyPrimryObjects_AreaShape_Zernike_9_3	0.0397859	0.501777	0.804798
Object_StDev_IdentifyPrimryObjects_AreaShape_Zernike_9_5	0.019245	0.745308	0.917041
Object_StDev_IdentifyPrimryObjects_AreaShape_Zernike_9_7	0.0255842	0.665847	0.886383
Object_StDev_IdentifyPrimryObjects_AreaShape_Zernike_9_9	0.0202892	0.732005	0.917041
Object_StDev_IdentifyPrimryObjects_Intensity_IntegratedIntensityEdge_Hematoxylin	0.0801302	0.175714	0.562139
Object_StDev_IdentifyPrimryObjects_Intensity_IntegratedIntensity_Hematoxylin	0.0507861	0.391128	0.734201
Object_StDev_IdentifyPrimryObjects_Intensity_LowerQuartileIntensity_Hematoxylin	0.0611081	0.302026	0.675782
Object_StDev_IdentifyPrimryObjects_Intensity_MADIntensity_Hematoxylin	0.0995168	0.0924155	0.442845
Object_StDev_IdentifyPrimryObjects_Intensity_MassDisplacement_Hematoxylin	0.15249	0.00973252	0.185263
Object_StDev_IdentifyPrimryObjects_Intensity_MaxIntensityEdge_Hematoxylin	-0.112991	0.0559165	0.367689
Object_StDev_IdentifyPrimryObjects_Intensity_MaxIntensity_Hematoxylin	-0.123425	0.0366888	0.328591
Object_StDev_IdentifyPrimryObjects_Intensity_MeanIntensityEdge_Hematoxylin	0.0558745	0.345377	0.707097
Object_StDev_IdentifyPrimryObjects_Intensity_MeanIntensity_Hematoxylin	-0.0110509	0.85204	0.964983
Object_StDev_IdentifyPrimryObjects_Intensity_MedianIntensity_Hematoxylin	-0.0451936	0.445427	0.774016
Object_StDev_IdentifyPrimryObjects_Intensity_MinIntensityEdge_Hematoxylin	0.152453	0.00975068	0.185263
Object_StDev_IdentifyPrimryObjects_Intensity_MinIntensity_Hematoxylin	0.15289	0.0095413	0.185066
Object_StDev_IdentifyPrimryObjects_Intensity_StdIntensityEdge_Hematoxylin	0.0650955	0.271529	0.645336
Object_StDev_IdentifyPrimryObjects_Intensity_StdIntensity_Hematoxylin	0.0810135	0.170989	0.557877
Object_StDev_IdentifyPrimryObjects_Intensity_UpperQuartileIntensity_Hematoxylin	-0.0757632	0.200507	0.586927
Object_StDev_IdentifyPrimryObjects_Location_CenterMassIntensity_X_Hematoxylin	-0.0691793	0.242544	0.617368
Object_StDev_IdentifyPrimryObjects_Location_CenterMassIntensity_Y_Hematoxylin	-0.109357	0.0643259	0.388385
Object_StDev_IdentifyPrimryObjects_Location_Center_X	-0.0692199	0.242267	0.617368
Object_StDev_IdentifyPrimryObjects_Location_Center_Y	-0.109152	0.0648299	0.388836
Object_StDev_IdentifyPrimryObjects_Location_MaxIntensity_X_Hematoxylin	-0.0683889	0.247977	0.62165
Object_StDev_IdentifyPrimryObjects_Location_MaxIntensity_Y_Hematoxylin	-0.108415	0.0666668	0.389643
Object_StDev_IdentifyPrimryObjects_Texture_AngularSecondMoment_Hematoxylin_1_00_16	0.0832054	0.159674	0.544643
Object_StDev_IdentifyPrimryObjects_Texture_AngularSecondMoment_Hematoxylin_1_01_16	0.0716484	0.226109	0.603996
Object_StDev_IdentifyPrimryObjects_Texture_AngularSecondMoment_Hematoxylin_1_02_16	0.0850313	0.150686	0.535182
Object_StDev_IdentifyPrimryObjects_Texture_AngularSecondMoment_Hematoxylin_1_03_16	0.0755291	0.201904	0.588599
Object_StDev_IdentifyPrimryObjects_Texture_Contrast_Hematoxylin_1_00_16	-0.0613934	0.299772	0.675782
Object_StDev_IdentifyPrimryObjects_Texture_Contrast_Hematoxylin_1_01_16	-0.0335036	0.571677	0.842087
Object_StDev_IdentifyPrimryObjects_Texture_Contrast_Hematoxylin_1_02_16	-0.061801	0.29657	0.672545
Object_StDev_IdentifyPrimryObjects_Texture_Contrast_Hematoxylin_1_03_16	-0.0294228	0.619422	0.865725
Object_StDev_IdentifyPrimryObjects_Texture_Correlation_Hematoxylin_1_00_16	0.0333198	0.573789	0.842625
Object_StDev_IdentifyPrimryObjects_Texture_Correlation_Hematoxylin_1_01_16	0.14245	0.0157961	0.2384
Object_StDev_IdentifyPrimryObjects_Texture_Correlation_Hematoxylin_1_02_16	0.0397413	0.502257	0.805093
Object_StDev_IdentifyPrimryObjects_Texture_Correlation_Hematoxylin_1_03_16	0.171325	0.0036381	0.117528
Object_StDev_IdentifyPrimryObjects_Texture_DifferenceEntropy_Hematoxylin_1_00_16	0.0116905	0.843584	0.961606
Object_StDev_IdentifyPrimryObjects_Texture_DifferenceEntropy_Hematoxylin_1_01_16	0.0038224	0.948564	0.98635
Object_StDev_IdentifyPrimryObjects_Texture_DifferenceEntropy_Hematoxylin_1_02_16	0.00833871	0.888078	0.971845
Object_StDev_IdentifyPrimryObjects_Texture_DifferenceEntropy_Hematoxylin_1_03_16	0.0164333	0.781498	0.931929
Object_StDev_IdentifyPrimryObjects_Texture_DifferenceVariance_Hematoxylin_1_00_16	-0.0349305	0.555403	0.838261
Object_StDev_IdentifyPrimryObjects_Texture_DifferenceVariance_Hematoxylin_1_01_16	-0.0369047	0.533267	0.824637
Object_StDev_IdentifyPrimryObjects_Texture_DifferenceVariance_Hematoxylin_1_02_16	-0.0353899	0.550212	0.835874
Object_StDev_IdentifyPrimryObjects_Texture_DifferenceVariance_Hematoxylin_1_03_16	-0.036628	0.536342	0.825391
Object_StDev_IdentifyPrimryObjects_Texture_Entropy_Hematoxylin_1_00_16	0.0196496	0.740145	0.917041
Object_StDev_IdentifyPrimryObjects_Texture_Entropy_Hematoxylin_1_01_16	-0.00127819	0.982792	0.992543
Object_StDev_IdentifyPrimryObjects_Texture_Entropy_Hematoxylin_1_02_16	0.0194765	0.742353	0.917041
Object_StDev_IdentifyPrimryObjects_Texture_Entropy_Hematoxylin_1_03_16	0.000221831	0.997016	0.998301
Object_StDev_IdentifyPrimryObjects_Texture_InfoMeas1_Hematoxylin_1_00_16	-0.0220724	0.709472	0.906152
Object_StDev_IdentifyPrimryObjects_Texture_InfoMeas1_Hematoxylin_1_01_16	-0.117366	0.0470239	0.354217
Object_StDev_IdentifyPrimryObjects_Texture_InfoMeas1_Hematoxylin_1_02_16	-0.0156596	0.791542	0.936422
Object_StDev_IdentifyPrimryObjects_Texture_InfoMeas1_Hematoxylin_1_03_16	-0.10923	0.0646374	0.388836
Object_StDev_IdentifyPrimryObjects_Texture_InfoMeas2_Hematoxylin_1_00_16	0.0698879	0.237744	0.614604
Object_StDev_IdentifyPrimryObjects_Texture_InfoMeas2_Hematoxylin_1_01_16	0.0855659	0.148129	0.529814
Object_StDev_IdentifyPrimryObjects_Texture_InfoMeas2_Hematoxylin_1_02_16	0.0701103	0.236251	0.612557
Object_StDev_IdentifyPrimryObjects_Texture_InfoMeas2_Hematoxylin_1_03_16	0.0850334	0.150676	0.535182
Object_StDev_IdentifyPrimryObjects_Texture_InverseDifferenceMoment_Hematoxylin_1_00_16	0.104671	0.0766775	0.410826
Object_StDev_IdentifyPrimryObjects_Texture_InverseDifferenceMoment_Hematoxylin_1_01_16	0.10274	0.0822964	0.421091
Object_StDev_IdentifyPrimryObjects_Texture_InverseDifferenceMoment_Hematoxylin_1_02_16	0.0690884	0.243164	0.617368
Object_StDev_IdentifyPrimryObjects_Texture_InverseDifferenceMoment_Hematoxylin_1_03_16	0.123627	0.0363812	0.328591
Object_StDev_IdentifyPrimryObjects_Texture_SumAverage_Hematoxylin_1_00_16	-0.0334406	0.5724	0.842087
Object_StDev_IdentifyPrimryObjects_Texture_SumAverage_Hematoxylin_1_01_16	-0.0376595	0.524922	0.819655
Object_StDev_IdentifyPrimryObjects_Texture_SumAverage_Hematoxylin_1_02_16	-0.0344122	0.561288	0.838383
Object_StDev_IdentifyPrimryObjects_Texture_SumAverage_Hematoxylin_1_03_16	-0.0357128	0.546579	0.832429
Object_StDev_IdentifyPrimryObjects_Texture_SumEntropy_Hematoxylin_1_00_16	0.0529435	0.3713	0.718279
Object_StDev_IdentifyPrimryObjects_Texture_SumEntropy_Hematoxylin_1_01_16	0.0267075	0.652118	0.880702
Object_StDev_IdentifyPrimryObjects_Texture_SumEntropy_Hematoxylin_1_02_16	0.0518729	0.38106	0.724059
Object_StDev_IdentifyPrimryObjects_Texture_SumEntropy_Hematoxylin_1_03_16	0.0317553	0.591918	0.84954
Object_StDev_IdentifyPrimryObjects_Texture_SumVariance_Hematoxylin_1_00_16	0.112941	0.0560263	0.367689
Object_StDev_IdentifyPrimryObjects_Texture_SumVariance_Hematoxylin_1_01_16	0.114835	0.0520119	0.360899
Object_StDev_IdentifyPrimryObjects_Texture_SumVariance_Hematoxylin_1_02_16	0.106872	0.0706554	0.395081
Object_StDev_IdentifyPrimryObjects_Texture_SumVariance_Hematoxylin_1_03_16	0.114623	0.0524483	0.360899
Object_StDev_IdentifyPrimryObjects_Texture_Variance_Hematoxylin_1_00_16	0.0700154	0.236888	0.613559
Object_StDev_IdentifyPrimryObjects_Texture_Variance_Hematoxylin_1_01_16	0.0617411	0.297039	0.672545
Object_StDev_IdentifyPrimryObjects_Texture_Variance_Hematoxylin_1_02_16	0.0724905	0.220689	0.601442
Object_StDev_IdentifyPrimryObjects_Texture_Variance_Hematoxylin_1_03_16	0.0626269	0.290152	0.667254
Object_Texture_AngularSecondMoment_Hematoxylin_1_00_16	-0.0303076	0.608923	0.860346
Object_Texture_AngularSecondMoment_Hematoxylin_1_01_16	-0.0385047	0.515658	0.812129
Object_Texture_AngularSecondMoment_Hematoxylin_1_02_16	-0.0296619	0.616577	0.863526
Object_Texture_AngularSecondMoment_Hematoxylin_1_03_16	-0.0411154	0.487584	0.796913
Object_Texture_Contrast_Hematoxylin_1_00_16	-0.0193308	0.744213	0.917041
Object_Texture_Contrast_Hematoxylin_1_01_16	-0.023376	0.693158	0.898171
Object_Texture_Contrast_Hematoxylin_1_02_16	-0.0427499	0.470435	0.785692
Object_Texture_Contrast_Hematoxylin_1_03_16	-0.0213531	0.718532	0.912407
Object_Texture_Correlation_Hematoxylin_1_00_16	0.052812	0.37249	0.718279
Object_Texture_Correlation_Hematoxylin_1_01_16	0.0522486	0.377618	0.723546
Object_Texture_Correlation_Hematoxylin_1_02_16	0.0569177	0.336435	0.700596
Object_Texture_Correlation_Hematoxylin_1_03_16	0.0399651	0.499851	0.804063
Object_Texture_DifferenceEntropy_Hematoxylin_1_00_16	-0.0282289	0.633711	0.869746
Object_Texture_DifferenceEntropy_Hematoxylin_1_01_16	-0.0296274	0.616987	0.863655
Object_Texture_DifferenceEntropy_Hematoxylin_1_02_16	-0.0458099	0.439242	0.768461
Object_Texture_DifferenceEntropy_Hematoxylin_1_03_16	-0.0261395	0.659046	0.884261
Object_Texture_DifferenceVariance_Hematoxylin_1_00_16	0.0297091	0.616016	0.863185
Object_Texture_DifferenceVariance_Hematoxylin_1_01_16	0.038856	0.511832	0.811162
Object_Texture_DifferenceVariance_Hematoxylin_1_02_16	0.0517237	0.382433	0.724597
Object_Texture_DifferenceVariance_Hematoxylin_1_03_16	0.0340269	0.565682	0.840298
Object_Texture_Entropy_Hematoxylin_1_00_16	0.00514577	0.930794	0.98217
Object_Texture_Entropy_Hematoxylin_1_01_16	0.00766561	0.89706	0.97362
Object_Texture_Entropy_Hematoxylin_1_02_16	-0.000554324	0.992539	0.997628
Object_Texture_Entropy_Hematoxylin_1_03_16	0.0111276	0.851026	0.964638
Object_Texture_InfoMeas1_Hematoxylin_1_00_16	-0.0838455	0.156478	0.54268
Object_Texture_InfoMeas1_Hematoxylin_1_01_16	-0.0769698	0.193416	0.584779
Object_Texture_InfoMeas1_Hematoxylin_1_02_16	-0.0896583	0.129634	0.497755
Object_Texture_InfoMeas1_Hematoxylin_1_03_16	-0.0697539	0.238646	0.615013
Object_Texture_InfoMeas2_Hematoxylin_1_00_16	0.105288	0.074948	0.404838
Object_Texture_InfoMeas2_Hematoxylin_1_01_16	0.0833592	0.158901	0.544643
Object_Texture_InfoMeas2_Hematoxylin_1_02_16	0.11022	0.0622402	0.381946
Object_Texture_InfoMeas2_Hematoxylin_1_03_16	0.0806577	0.172881	0.557877
Object_Texture_InverseDifferenceMoment_Hematoxylin_1_00_16	0.0349193	0.55553	0.838261
Object_Texture_InverseDifferenceMoment_Hematoxylin_1_01_16	0.0392737	0.507302	0.808885
Object_Texture_InverseDifferenceMoment_Hematoxylin_1_02_16	0.0467835	0.429571	0.761843
Object_Texture_InverseDifferenceMoment_Hematoxylin_1_03_16	0.0340757	0.565125	0.840298
Object_Texture_SumAverage_Hematoxylin_1_00_16	0.178742	0.0024023	0.101811
Object_Texture_SumAverage_Hematoxylin_1_01_16	0.178742	0.0024023	0.101811
Object_Texture_SumAverage_Hematoxylin_1_02_16	0.178766	0.00239904	0.101811
Object_Texture_SumAverage_Hematoxylin_1_03_16	0.178742	0.0024023	0.101811
Object_Texture_SumEntropy_Hematoxylin_1_00_16	0.0480302	0.417368	0.752997
Object_Texture_SumEntropy_Hematoxylin_1_01_16	0.0548324	0.354459	0.711209
Object_Texture_SumEntropy_Hematoxylin_1_02_16	0.0461485	0.435865	0.76551
Object_Texture_SumEntropy_Hematoxylin_1_03_16	0.0507475	0.391488	0.734201
Object_Texture_SumVariance_Hematoxylin_1_00_16	-0.00422088	0.943211	0.985511
Object_Texture_SumVariance_Hematoxylin_1_01_16	-0.00611127	0.917851	0.979388
Object_Texture_SumVariance_Hematoxylin_1_02_16	-0.00477622	0.935754	0.982776
Object_Texture_SumVariance_Hematoxylin_1_03_16	-0.00736509	0.901075	0.974612
Object_Texture_Variance_Hematoxylin_1_00_16	-0.00404271	0.945604	0.985881
Object_Texture_Variance_Hematoxylin_1_01_16	-0.00409956	0.94484	0.985881
Object_Texture_Variance_Hematoxylin_1_02_16	-0.00420413	0.943436	0.985511
Object_Texture_Variance_Hematoxylin_1_03_16	-0.00409956	0.94484	0.985881
resnet0	0.117419	0.0469243	0.354217
resnet1	-0.108156	0.0673251	0.389643
resnet2	-0.0359909	0.543457	0.830932
resnet3	-0.0409103	0.489759	0.796913
resnet4	-0.169105	0.00410671	0.128252
resnet5	-0.0204389	0.730104	0.917041
resnet6	-0.0546105	0.356412	0.712024
resnet7	0.00924482	0.876009	0.968174
resnet8	-0.129957	0.0277729	0.298257
resnet9	-0.0378509	0.522817	0.818257
resnet10	-0.144501	0.0143405	0.229195
resnet11	-0.0253796	0.66836	0.888015
resnet12	0.095401	0.106756	0.467079
resnet13	0.121645	0.0395035	0.335409
resnet14	-0.0773444	0.191252	0.581545
resnet15	0.117051	0.0476215	0.354217
resnet16	-0.0765505	0.195859	0.584779
resnet17	0.0578908	0.328229	0.689447
resnet18	0.220772	0.000168853	0.0417066
resnet19	-0.0379219	0.522036	0.817506
resnet20	0.00322188	0.956637	0.98635
resnet21	0.0349021	0.555725	0.838261
resnet22	-0.00655391	0.911924	0.978553
resnet23	-0.00656559	0.911767	0.978553
resnet24	0.0704367	0.234073	0.610927
resnet25	0.00577167	0.922401	0.980835
resnet26	-0.00903111	0.878853	0.968174
resnet27	-0.0718946	0.224515	0.603996
resnet28	0.127165	0.0313273	0.314082
resnet29	0.0657223	0.267107	0.64224
resnet30	0.00634224	0.914758	0.979091
resnet31	-0.0483434	0.414335	0.752904
resnet32	0.106812	0.070814	0.395081
resnet33	0.107785	0.0682729	0.389643
resnet34	0.0297203	0.615883	0.863185
resnet35	0.146261	0.0131864	0.222176
resnet36	0.00494018	0.933553	0.98217
resnet37	0.0530344	0.370478	0.718279
resnet38	-0.0916741	0.121207	0.489894
resnet39	-0.00709199	0.904725	0.975065
resnet40	-0.0135261	0.819417	0.950224
resnet41	0.0118743	0.841157	0.96107
resnet42	0.0609974	0.302904	0.675782
resnet43	0.147011	0.0127205	0.222176
resnet44	0.0396291	0.503466	0.806554
resnet45	-0.0621558	0.293801	0.669094
resnet46	0.125292	0.0339223	0.321139
resnet47	-0.126313	0.0324858	0.318285
resnet48	-0.0578756	0.328357	0.689447
resnet49	-0.0486155	0.411711	0.751254
resnet50	-0.0130845	0.825217	0.95247
resnet51	-0.0669524	0.258069	0.628855
resnet52	0.110018	0.0627235	0.382107
resnet53	-0.130487	0.0271391	0.293772
resnet54	-0.0349661	0.555001	0.838261
resnet55	-0.0481297	0.416403	0.752997
resnet56	0.0837496	0.156954	0.54268
resnet57	-0.0461586	0.435763	0.76551
resnet58	-0.0324731	0.583568	0.84608
resnet59	0.161309	0.00621608	0.152002
resnet60	0.0224882	0.704255	0.904709
resnet61	-0.0192237	0.745581	0.917041
resnet62	0.117191	0.0473556	0.354217
resnet63	-0.0511897	0.387371	0.731402
resnet64	0.0590614	0.31853	0.681236
resnet65	0.0908593	0.12456	0.490028
resnet66	-0.00912857	0.877556	0.968174
resnet67	0.00493561	0.933614	0.98217
resnet68	0.0874796	0.139245	0.515433
resnet69	0.0609969	0.302908	0.675782
resnet70	0.0735778	0.213829	0.600214
resnet71	-0.0195404	0.741537	0.917041
resnet72	0.0290304	0.624103	0.866916
resnet73	-0.0187384	0.75179	0.920135
resnet74	-0.0602797	0.308637	0.678999
resnet75	-0.072058	0.223461	0.603996
resnet76	0.0910543	0.123751	0.489894
resnet77	0.0144601	0.807184	0.944358
resnet78	0.0102469	0.862696	0.966208
resnet79	-0.107147	0.0699292	0.395081
resnet80	-0.0757337	0.200683	0.586927
resnet81	-0.0810242	0.170933	0.557877
resnet82	-0.0519668	0.380198	0.724059
resnet83	0.0599588	0.311222	0.678999
resnet84	-0.106543	0.07153	0.396627
resnet85	-0.030633	0.605082	0.857546
resnet86	0.0493693	0.404491	0.744508
resnet87	0.0435855	0.461799	0.78052
resnet88	-0.00800571	0.89252	0.973158
resnet89	0.0607898	0.304555	0.675782
resnet90	-0.0258933	0.662058	0.884806
resnet91	0.0746043	0.207495	0.594242
resnet92	-0.00229039	0.969167	0.989563
resnet93	0.0508115	0.390891	0.734201
resnet94	-0.130818	0.0267502	0.293772
resnet95	-0.0313703	0.596627	0.853625
resnet96	0.00360615	0.951471	0.98635
resnet97	-0.0585126	0.323053	0.683595
resnet98	-0.0531511	0.369425	0.718279
resnet99	-0.00212795	0.971353	0.990462
resnet100	-0.178573	0.00242563	0.101811
resnet101	-0.0600868	0.31019	0.678999
resnet102	-0.00619909	0.916675	0.979091
resnet103	0.18057	0.00216349	0.101811
resnet104	-0.100496	0.0892414	0.438461
resnet105	0.0873664	0.139759	0.516176
resnet106	0.0405403	0.493697	0.798438
resnet107	-0.019848	0.737616	0.917041
resnet108	-0.10641	0.0718861	0.396981
resnet109	0.0350782	0.553732	0.837682
resnet110	-0.131578	0.0258735	0.291694
resnet111	-0.1235	0.0365746	0.328591
resnet112	-0.159705	0.00675515	0.154233
resnet113	0.0388854	0.511512	0.811162
resnet114	-0.11945	0.043224	0.346252
resnet115	0.05191	0.38072	0.724059
resnet116	0.0833034	0.159181	0.544643
resnet117	-0.102198	0.0839343	0.424704
resnet118	0.233859	6.62761e-05	0.037154
resnet119	-0.0307416	0.603803	0.857266
resnet120	0.0150109	0.799992	0.943633
resnet121	-0.0284543	0.631003	0.869746
resnet122	-0.0179693	0.761663	0.923017
resnet123	-0.0320751	0.588191	0.848775
resnet124	-0.0581055	0.326436	0.688073
resnet125	-0.00391174	0.947364	0.98635
resnet126	-0.0157165	0.790803	0.936214
resnet127	0.134917	0.0223104	0.266053
resnet128	-0.0568766	0.336785	0.700596
resnet129	0.00596304	0.919837	0.979388
resnet130	0.059369	0.316013	0.680267
resnet131	-0.00255131	0.965657	0.987463
resnet132	0.0552999	0.350367	0.708821
resnet133	0.070527	0.233472	0.610927
resnet134	-0.110199	0.0622899	0.381946
resnet135	-0.0244446	0.67989	0.893716
resnet136	0.0506902	0.392024	0.734201
resnet137	0.0521333	0.378672	0.724033
resnet138	0.0121124	0.838016	0.958744
resnet139	0.19192	0.00110519	0.0932015
resnet140	-0.118861	0.0442707	0.349373
resnet141	-0.0093834	0.874166	0.968174
resnet142	-0.107233	0.0697045	0.395081
resnet143	-0.0240979	0.684185	0.893716
resnet144	-0.1125	0.0569973	0.368718
resnet145	-0.00426809	0.942576	0.985511
resnet146	0.0328873	0.578774	0.842796
resnet147	-0.142345	0.0158737	0.2384
resnet148	0.00762906	0.897548	0.97362
resnet149	-0.0753327	0.203083	0.588874
resnet150	-0.0186028	0.753527	0.920253
resnet151	0.0376052	0.52552	0.819655
resnet152	-0.0221973	0.707904	0.90597
resnet153	0.0162581	0.783769	0.932018
resnet154	0.0306091	0.605364	0.857546
resnet155	-0.157446	0.00758522	0.162276
resnet156	0.0552034	0.351208	0.709485
resnet157	0.0817049	0.167357	0.552755
resnet158	0.0299497	0.61316	0.862718
resnet159	-0.00292441	0.960659	0.98635
resnet160	0.0981524	0.0969884	0.453265
resnet161	-0.00347366	0.953252	0.98635
resnet162	-0.00931284	0.875104	0.968174
resnet163	-0.0421286	0.476915	0.789146
resnet164	0.0359478	0.543941	0.830932
resnet165	-0.0768287	0.194236	0.584779
resnet166	0.0193734	0.743668	0.917041
resnet167	-0.0203876	0.730755	0.917041
resnet168	-0.0199211	0.736685	0.917041
resnet169	0.0214724	0.717027	0.912407
resnet170	-0.091867	0.120423	0.489894
resnet171	-0.0675422	0.253891	0.628046
resnet172	0.0196653	0.739944	0.917041
resnet173	0.0159911	0.787359	0.934172
resnet174	0.0243055	0.681612	0.893716
resnet175	0.0498572	0.399859	0.740876
resnet176	0.0160429	0.786562	0.933861
resnet177	0.0534664	0.366589	0.718279
resnet178	0.0442439	0.455056	0.7803
resnet179	-0.0918863	0.120345	0.489894
resnet180	0.115628	0.0504029	0.359894
resnet181	-0.0413514	0.485087	0.794923
resnet182	-0.0910253	0.123871	0.489894
resnet183	0.0176998	0.765133	0.92432
resnet184	0.135647	0.0215907	0.266053
resnet185	-0.0621853	0.293572	0.669094
resnet186	-0.146314	0.0131531	0.222176
resnet187	-0.018444	0.755565	0.920364
resnet188	0.0680361	0.25043	0.623973
resnet189	-0.0184201	0.755872	0.920364
resnet190	0.00327315	0.955948	0.98635
resnet191	0.0213095	0.719083	0.912407
resnet192	-0.129326	0.0285441	0.301768
resnet193	-0.00781129	0.895115	0.97362
resnet194	0.14948	0.0112862	0.206322
resnet195	0.123086	0.0372114	0.328591
resnet196	0.0222161	0.707668	0.90597
resnet197	-0.174399	0.00306901	0.114381
resnet198	-0.052845	0.372191	0.718279
resnet199	-0.0168546	0.776043	0.930498
resnet200	0.113037	0.0558169	0.367689
resnet201	0.0832044	0.159679	0.544643
resnet202	-0.0671407	0.25673	0.628046
resnet203	-0.111601	0.0590182	0.374655
resnet204	0.031833	0.591012	0.849169
resnet205	-0.00759454	0.898009	0.97362
resnet206	0.0224024	0.70533	0.904807
resnet207	-0.0953056	0.107108	0.467867
resnet208	-0.0350707	0.554035	0.837682
resnet209	-0.0436408	0.46123	0.7803
resnet210	-0.171386	0.00362595	0.117528
resnet211	0.0479064	0.418571	0.753447
resnet212	-0.10429	0.0777602	0.41263
resnet213	-0.0256009	0.665642	0.886383
resnet214	-0.0598172	0.312368	0.678999
resnet215	-0.0190683	0.747567	0.918236
resnet216	0.0133007	0.822376	0.95182
resnet217	0.0437352	0.46026	0.7803
resnet218	-0.162795	0.00575152	0.151248
resnet219	-0.097027	0.100894	0.459422
resnet220	-0.160696	0.00641742	0.152002
resnet221	0.018544	0.754282	0.920364
resnet222	-0.0124804	0.833165	0.957763
resnet223	0.0098032	0.868586	0.966915
resnet224	0.0195892	0.740915	0.917041
resnet225	-0.0982925	0.0965107	0.453265
resnet226	-0.137457	0.0198932	0.25738
resnet227	-0.0734718	0.214491	0.600297
resnet228	0.0750703	0.204664	0.589773
resnet229	-0.0134789	0.820037	0.950529
resnet230	0.0369514	0.532749	0.824304
resnet231	0.12958	0.0282323	0.299981
resnet232	0.0354681	0.549331	0.835217
resnet233	0.0906172	0.12557	0.490973
resnet234	-0.098026	0.0974209	0.453265
resnet235	0.188232	0.00138037	0.0932015
resnet236	0.116837	0.0480308	0.354217
resnet237	-0.0286888	0.62819	0.869401
resnet238	-0.0681981	0.249302	0.622655
resnet239	0.107862	0.0680747	0.389643
resnet240	0.0731981	0.216207	0.600297
resnet241	-0.155351	0.00843522	0.173625
resnet242	-0.0012051	0.983776	0.992543
resnet243	-0.174375	0.00307318	0.114381
resnet244	-0.104132	0.0782128	0.41263
resnet245	-0.061202	0.301283	0.675782
resnet246	-0.136375	0.0208931	0.262809
resnet247	-0.122079	0.0388018	0.33468
resnet248	-0.193515	0.00100262	0.0922983
resnet249	0.0268832	0.649982	0.880702
resnet250	0.00368077	0.950468	0.98635
resnet251	-0.0322741	0.585877	0.847619
resnet252	-0.0345127	0.560144	0.838383
resnet253	0.103146	0.081089	0.417271
resnet254	-0.0593101	0.316494	0.680267
resnet255	0.0550978	0.352132	0.709749
resnet256	0.11343	0.0549652	0.366552
resnet257	0.107119	0.0700038	0.395081
resnet258	0.0719854	0.223928	0.603996
resnet259	0.010853	0.854661	0.966208
resnet260	0.000611685	0.991766	0.997628
resnet261	0.00573461	0.922898	0.980835
resnet262	0.0086108	0.884451	0.970538
resnet263	-0.116465	0.0487506	0.355108
resnet264	-0.120006	0.0422552	0.344767
resnet265	0.0613584	0.300048	0.675782
resnet266	-0.134496	0.0227351	0.266053
resnet267	-0.0514617	0.38485	0.727654
resnet268	-0.0198907	0.737073	0.917041
resnet269	0.044517	0.452275	0.777742
resnet270	-0.0386864	0.513677	0.81171
resnet271	-0.0666706	0.260081	0.632057
resnet272	0.0734185	0.214825	0.600297
resnet273	-0.139415	0.0181871	0.254553
resnet274	0.142335	0.0158816	0.2384
resnet275	-0.0525877	0.374527	0.720672
resnet276	-0.0337914	0.568376	0.841807
resnet277	-0.0389605	0.510696	0.811162
resnet278	-0.121948	0.0390118	0.335409
resnet279	-0.0980244	0.0974262	0.453265
resnet280	0.0136038	0.818398	0.949845
resnet281	0.0121149	0.837983	0.958744
resnet282	-0.0591675	0.317661	0.680666
resnet283	-0.016282	0.783459	0.932018
resnet284	0.0476901	0.420677	0.753447
resnet285	-0.00069595	0.990632	0.99689
resnet286	0.0293918	0.619791	0.865795
resnet287	0.0566354	0.33884	0.701698
resnet288	0.0270943	0.647418	0.878199
resnet289	0.0257786	0.663463	0.885718
resnet290	0.165818	0.00490111	0.141348
resnet291	-0.0164246	0.78161	0.931929
resnet292	-0.110604	0.0613308	0.381137
resnet293	-0.0480541	0.417137	0.752997
resnet294	0.0278553	0.638211	0.871805
resnet295	-0.189194	0.00130309	0.0932015
resnet296	-0.0608335	0.304207	0.675782
resnet297	0.0231425	0.69607	0.898171
resnet298	-0.0750508	0.204912	0.589773
resnet299	-0.00349041	0.953027	0.98635
resnet300	-0.0427078	0.470873	0.785692
resnet301	0.0128819	0.82788	0.95388
resnet302	-0.0582141	0.325531	0.687037
resnet303	-0.00148835	0.979963	0.992101
resnet304	-0.14916	0.0114635	0.207641
resnet305	-0.0493688	0.404496	0.744508
resnet306	-0.0708793	0.231141	0.609127
resnet307	-0.11502	0.0516334	0.360637
resnet308	-0.0847658	0.151968	0.537628
resnet309	0.0337503	0.568847	0.841807
resnet310	0.0878964	0.137365	0.511262
resnet311	-0.00383001	0.948462	0.98635
resnet312	0.048783	0.4101	0.749826
resnet313	-0.0446561	0.450863	0.776295
resnet314	-0.0641061	0.278892	0.65123
resnet315	-0.0193074	0.744511	0.917041
resnet316	0.0121748	0.837193	0.958744
resnet317	-0.0957396	0.105514	0.462884
resnet318	-0.0452748	0.444609	0.773538
resnet319	-0.00856511	0.88506	0.970814
resnet320	0.0206968	0.726834	0.915507
resnet321	0.134481	0.0227506	0.266053
resnet322	0.165465	0.00499426	0.141348
resnet323	0.0337523	0.568824	0.841807
resnet324	-0.03746	0.527121	0.821209
resnet325	0.0705499	0.23332	0.610927
resnet326	-0.0673087	0.25554	0.628046
resnet327	-0.119244	0.0435871	0.346275
resnet328	-0.00901741	0.879035	0.968174
resnet329	-0.0495719	0.402564	0.742544
resnet330	0.0310807	0.599815	0.855376
resnet331	-0.0731215	0.216689	0.600297
resnet332	0.0309228	0.60167	0.856332
resnet333	0.0828521	0.161458	0.545474
resnet334	0.128859	0.0291273	0.303214
resnet335	-0.0288888	0.625796	0.867937
resnet336	-0.0820572	0.165529	0.551134
resnet337	-0.0620939	0.294283	0.669094
resnet338	0.00374677	0.949609	0.98635
resnet339	0.00577827	0.922313	0.980835
resnet340	0.0166962	0.778092	0.931311
resnet341	-0.138148	0.0192753	0.25512
resnet342	-0.00258532	0.965199	0.987463
resnet343	-0.178683	0.00241045	0.101811
resnet344	0.0889131	0.132862	0.504279
resnet345	-0.0052077	0.929964	0.98217
resnet346	-0.00222085	0.970103	0.990147
resnet347	0.0979265	0.0977625	0.453364
resnet348	-0.050247	0.396181	0.736941
resnet349	0.00735291	0.901238	0.974612
resnet350	-0.119902	0.0424343	0.344882
resnet351	0.0250623	0.672263	0.8892
resnet352	-0.12438	0.0352513	0.328006
resnet353	-0.0242263	0.682593	0.893716
resnet354	-0.0505272	0.39355	0.735218
resnet355	-0.112797	0.0563421	0.368032
resnet356	0.0198003	0.738224	0.917041
resnet357	-0.083181	0.159796	0.544643
resnet358	-0.108073	0.0675124	0.389643
resnet359	-0.111142	0.060073	0.378434
resnet360	-0.120146	0.0420139	0.343831
resnet361	-0.0249771	0.673314	0.8892
resnet362	-0.0916543	0.121287	0.489894
resnet363	0.0555207	0.348444	0.708542
resnet364	-0.0779317	0.187895	0.576198
resnet365	-0.0161551	0.785106	0.933018
resnet366	-0.067098	0.257033	0.628046
resnet367	-0.110545	0.0614697	0.381137
resnet368	0.164883	0.00515125	0.144288
resnet369	-0.000503561	0.993222	0.997628
resnet370	0.0247598	0.675994	0.891158
resnet371	0.0291756	0.622369	0.866723
resnet372	-0.113331	0.0551785	0.366552
resnet373	0.063601	0.282703	0.6565
resnet374	0.0816902	0.167434	0.552755
resnet375	0.204865	0.000490578	0.073801
resnet376	-0.0690869	0.243175	0.617368
resnet377	-0.0602259	0.30907	0.678999
resnet378	-0.0477658	0.41994	0.753447
resnet379	-0.0410611	0.48816	0.796913
resnet380	-0.0114063	0.84734	0.962052
resnet381	-0.0105509	0.858663	0.966208
resnet382	-0.120467	0.0414649	0.341395
resnet383	0.00967731	0.870258	0.968168
resnet384	0.0532724	0.368332	0.718279
resnet385	-0.106587	0.0714134	0.396627
resnet386	0.0260649	0.659958	0.884524
resnet387	0.0436642	0.46099	0.7803
resnet388	0.134417	0.0228158	0.266053
resnet389	0.0598959	0.311731	0.678999
resnet390	-0.108223	0.0671536	0.389643
resnet391	-0.0326584	0.581421	0.845676
resnet392	0.0677158	0.252671	0.62664
resnet393	-0.0825953	0.162765	0.546045
resnet394	-0.029236	0.621648	0.866723
resnet395	-0.0347193	0.557797	0.838383
resnet396	-0.0877496	0.138025	0.513013
resnet397	0.0836684	0.157358	0.543253
resnet398	-0.0398707	0.500865	0.804286
resnet399	0.226938	0.000109397	0.037154
resnet400	0.049316	0.404999	0.744508
resnet401	-0.211362	0.000320263	0.062154
resnet402	0.0819303	0.166186	0.551988
resnet403	0.092732	0.116958	0.489759
resnet404	-0.10012	0.0904485	0.44041
resnet405	-0.173732	0.00318513	0.115098
resnet406	0.0167287	0.777672	0.931218
resnet407	-0.0439931	0.457618	0.7803
resnet408	0.00913873	0.877421	0.968174
resnet409	-0.0345833	0.559342	0.838383
resnet410	-0.0449417	0.448199	0.774016
resnet411	0.0486343	0.41153	0.751254
resnet412	-0.0939716	0.112129	0.480364
resnet413	-0.0647163	0.274335	0.648037
resnet414	0.0065595	0.911849	0.978553
resnet415	0.043024	0.467592	0.784711
resnet416	-0.125546	0.0335602	0.320394
resnet417	0.105948	0.0731343	0.398208
resnet418	-0.0567862	0.337554	0.700596
resnet419	-0.165482	0.00498967	0.141348
resnet420	0.0158835	0.788632	0.934379
resnet421	0.0610076	0.302823	0.675782
resnet422	0.0839917	0.155755	0.54268
resnet423	0.0099824	0.866206	0.966208
resnet424	-0.0549202	0.353688	0.711209
resnet425	-0.0289786	0.624722	0.867332
resnet426	-0.0438114	0.459479	0.7803
resnet427	-0.125852	0.0331271	0.320394
resnet428	0.083742	0.156992	0.54268
resnet429	0.152758	0.0096041	0.185066
resnet430	0.0183358	0.756953	0.92061
resnet431	0.0622508	0.293063	0.669094
resnet432	-0.0231943	0.695424	0.898171
resnet433	0.0478774	0.418853	0.753447
resnet434	-0.0272781	0.645189	0.876812
resnet435	0.0257623	0.663662	0.885718
resnet436	-0.0209308	0.72387	0.914244
resnet437	-0.0307563	0.603629	0.857266
resnet438	-0.0258999	0.661977	0.884806
resnet439	-0.0768139	0.194321	0.584779
resnet440	0.0305	0.606651	0.858922
resnet441	-0.171595	0.00358452	0.117528
resnet442	0.0597329	0.313051	0.679421
resnet443	0.0761616	0.198145	0.586042
resnet444	-0.173303	0.00326189	0.115098
resnet445	0.00750672	0.899182	0.974114
resnet446	0.0430378	0.46745	0.784711
resnet447	0.0182201	0.75844	0.920769
resnet448	0.0247212	0.676471	0.891353
resnet449	-0.0919066	0.120263	0.489894
resnet450	0.00405641	0.94542	0.985881
resnet451	0.04718	0.425668	0.757394
resnet452	0.0759398	0.199458	0.586042
resnet453	0.0201557	0.733702	0.917041
resnet454	0.0178653	0.763002	0.923111
resnet455	-0.00290208	0.960938	0.98635
resnet456	0.00695798	0.906517	0.976222
resnet457	0.00260004	0.965001	0.987463
resnet458	-0.0593939	0.31581	0.680267
resnet459	-0.103075	0.081298	0.417486
resnet460	-0.202854	0.000558353	0.073801
resnet461	-0.097296	0.0999492	0.457175
resnet462	0.0842841	0.154316	0.542403
resnet463	0.0906126	0.125589	0.490973
resnet464	-0.0104606	0.859861	0.966208
resnet465	-0.0476921	0.420657	0.753447
resnet466	-0.138432	0.0190273	0.25512
resnet467	-0.148673	0.0117381	0.211208
resnet468	-0.101815	0.0851038	0.426059
resnet469	-0.0670001	0.257729	0.628591
resnet470	0.135373	0.0218585	0.266053
resnet471	0.0232978	0.694133	0.898171
resnet472	0.0242232	0.68263	0.893716
resnet473	0.0198348	0.737784	0.917041
resnet474	-0.110792	0.0608898	0.380427
resnet475	-0.00893847	0.880158	0.968924
resnet476	-0.0553755	0.349707	0.708542
resnet477	0.00292695	0.960603	0.98635
resnet478	-0.0237867	0.688048	0.896607
resnet479	-0.0297152	0.615944	0.863185
resnet480	0.000803566	0.989182	0.996518
resnet481	-0.189097	0.00131073	0.0932015
resnet482	-0.0242928	0.681769	0.893716
resnet483	-0.131893	0.0255179	0.288884
resnet484	-0.021175	0.720782	0.913417
resnet485	0.168098	0.00433678	0.13332
resnet486	-0.0114804	0.84636	0.961606
resnet487	-0.000182236	0.997549	0.998301
resnet488	-0.13826	0.0191776	0.25512
resnet489	0.0937371	0.11303	0.480364
resnet490	-0.0122342	0.83641	0.958744
resnet491	0.0977838	0.0982539	0.453364
resnet492	-0.0151769	0.797827	0.942067
resnet493	-0.0695402	0.240091	0.616565
resnet494	-0.014749	0.80341	0.943633
resnet495	-0.0376204	0.525353	0.819655
resnet496	-0.0319549	0.5898	0.848775
resnet497	0.0246598	0.677229	0.891488
resnet498	-0.0480008	0.417654	0.752997
resnet499	0.146661	0.0129362	0.222176
resnet500	-0.0342523	0.56311	0.839397
resnet501	-0.0773378	0.19129	0.581545
resnet502	-0.0542735	0.359391	0.715742
resnet503	-0.11898	0.0440569	0.348987
resnet504	-0.00848389	0.886142	0.971218
resnet505	0.0128581	0.828194	0.95388
resnet506	0.0394869	0.504998	0.807581
resnet507	-0.0277248	0.639786	0.87258
resnet508	-0.112081	0.0579331	0.372114
resnet509	-0.048183	0.415887	0.752997
resnet510	0.0228928	0.69919	0.900332
resnet511	-0.123065	0.0372445	0.328591
resnet512	0.140522	0.0172809	0.251082
resnet513	-0.0574091	0.332275	0.695151
[truncated: 1,534 more rows]

## Sheet: Table S5
TableS5. Elastic Network Analysis.
[truncated: 71 more rows]

[truncated: 4 more sheets: Table S6, Table S7, Table S8, Table S9]
