# Supplementary figures and images for: Integrated Multi-Omics and Pathomics Analysis for Prognostic Modeling of Hepatocellular Carcinoma Reveals Oxidative Stress-Driven Immunometabolic Regulatory Mechanisms
Source: Research Square preprint supplement (doi:10.21203/rs.3.rs-7489138/v1), 2025-10-31

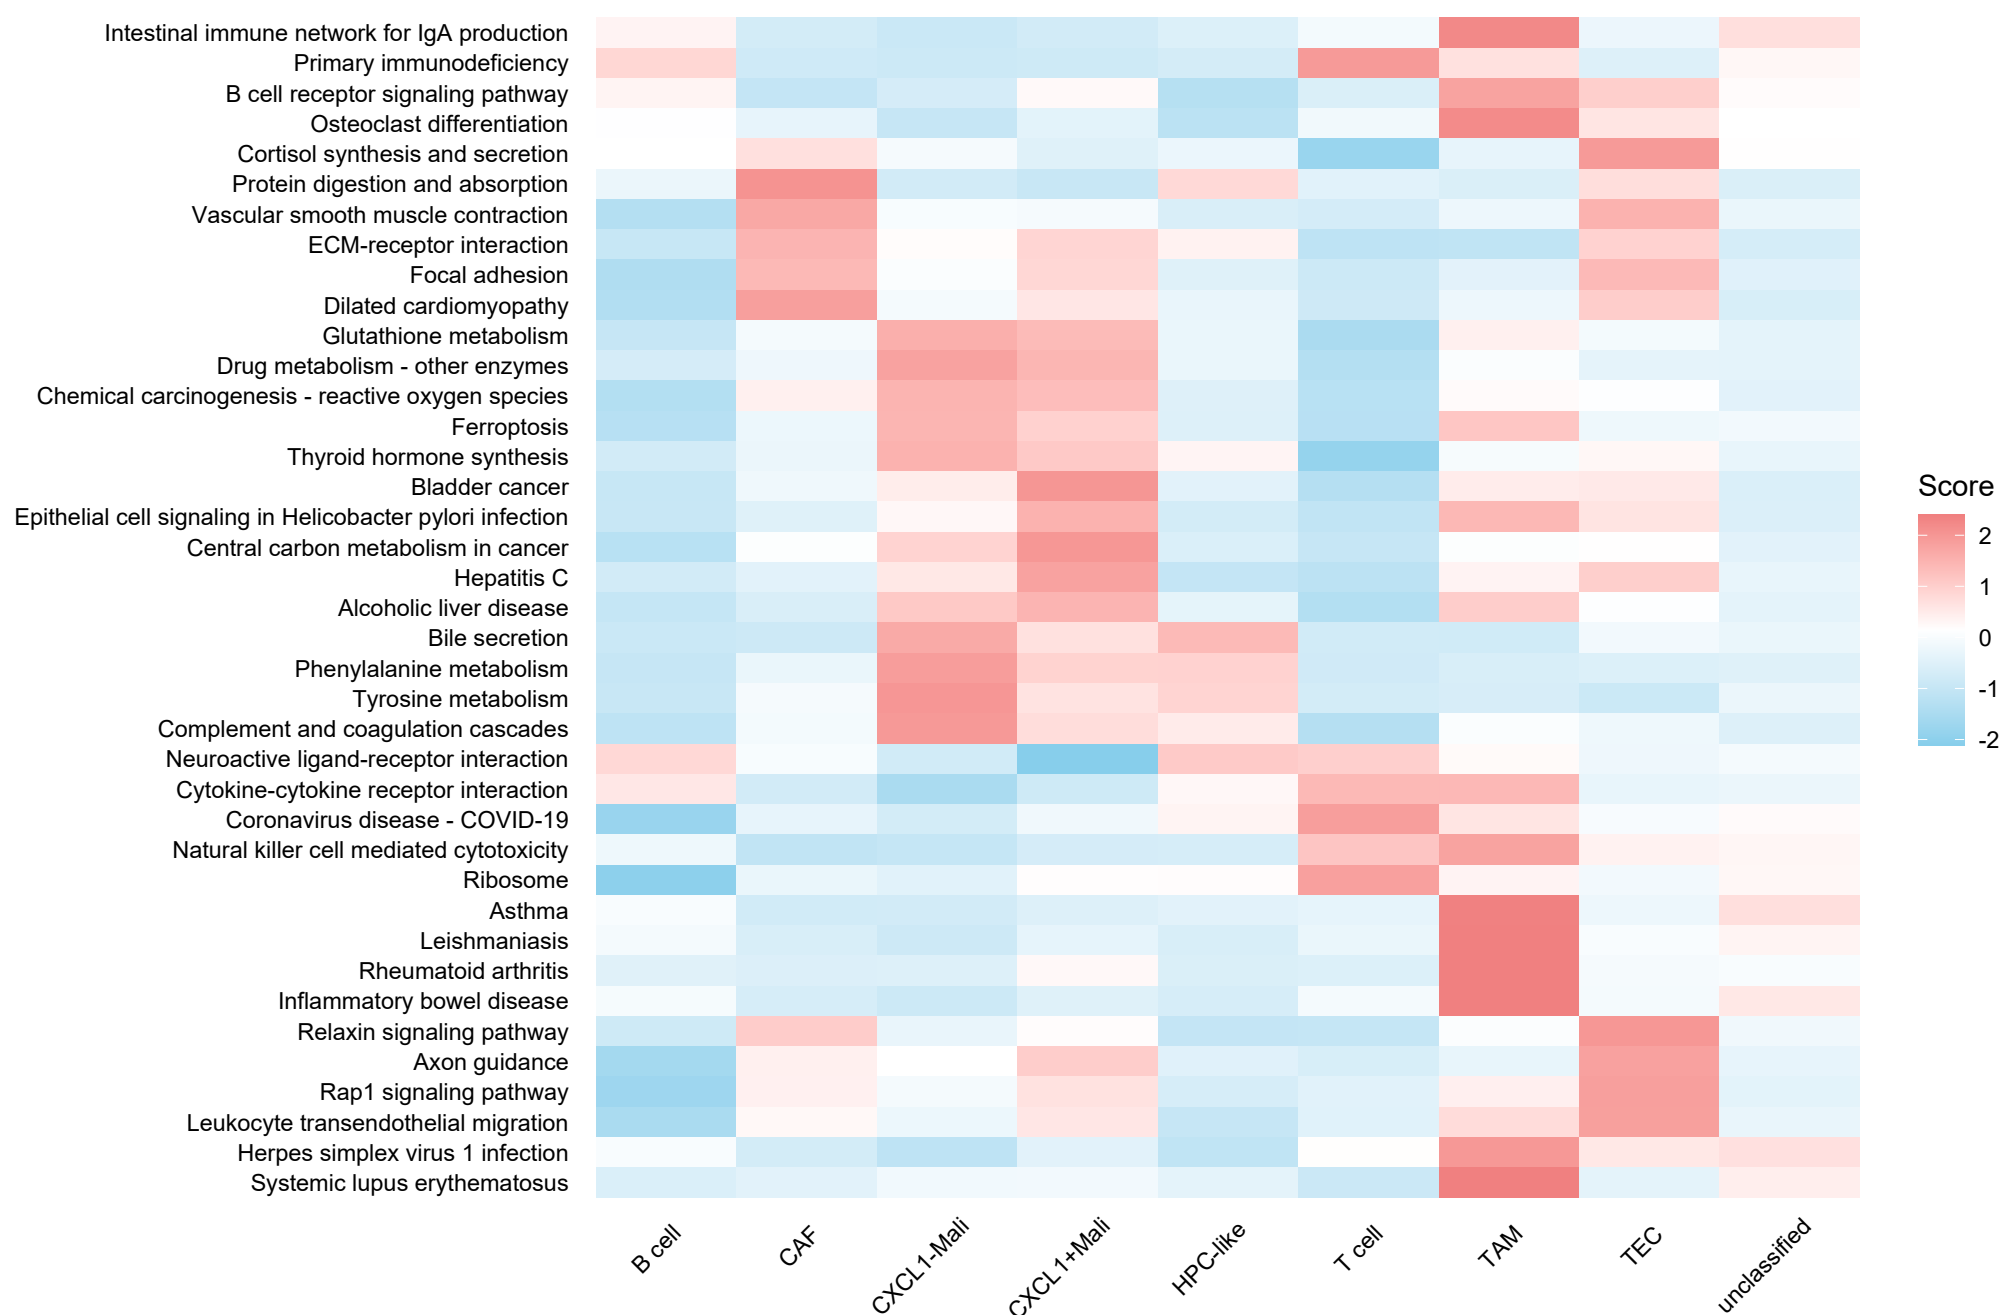

Supplement: Supplementary file 1 [file 85d6641c6e328c5d1decb352.pdf]

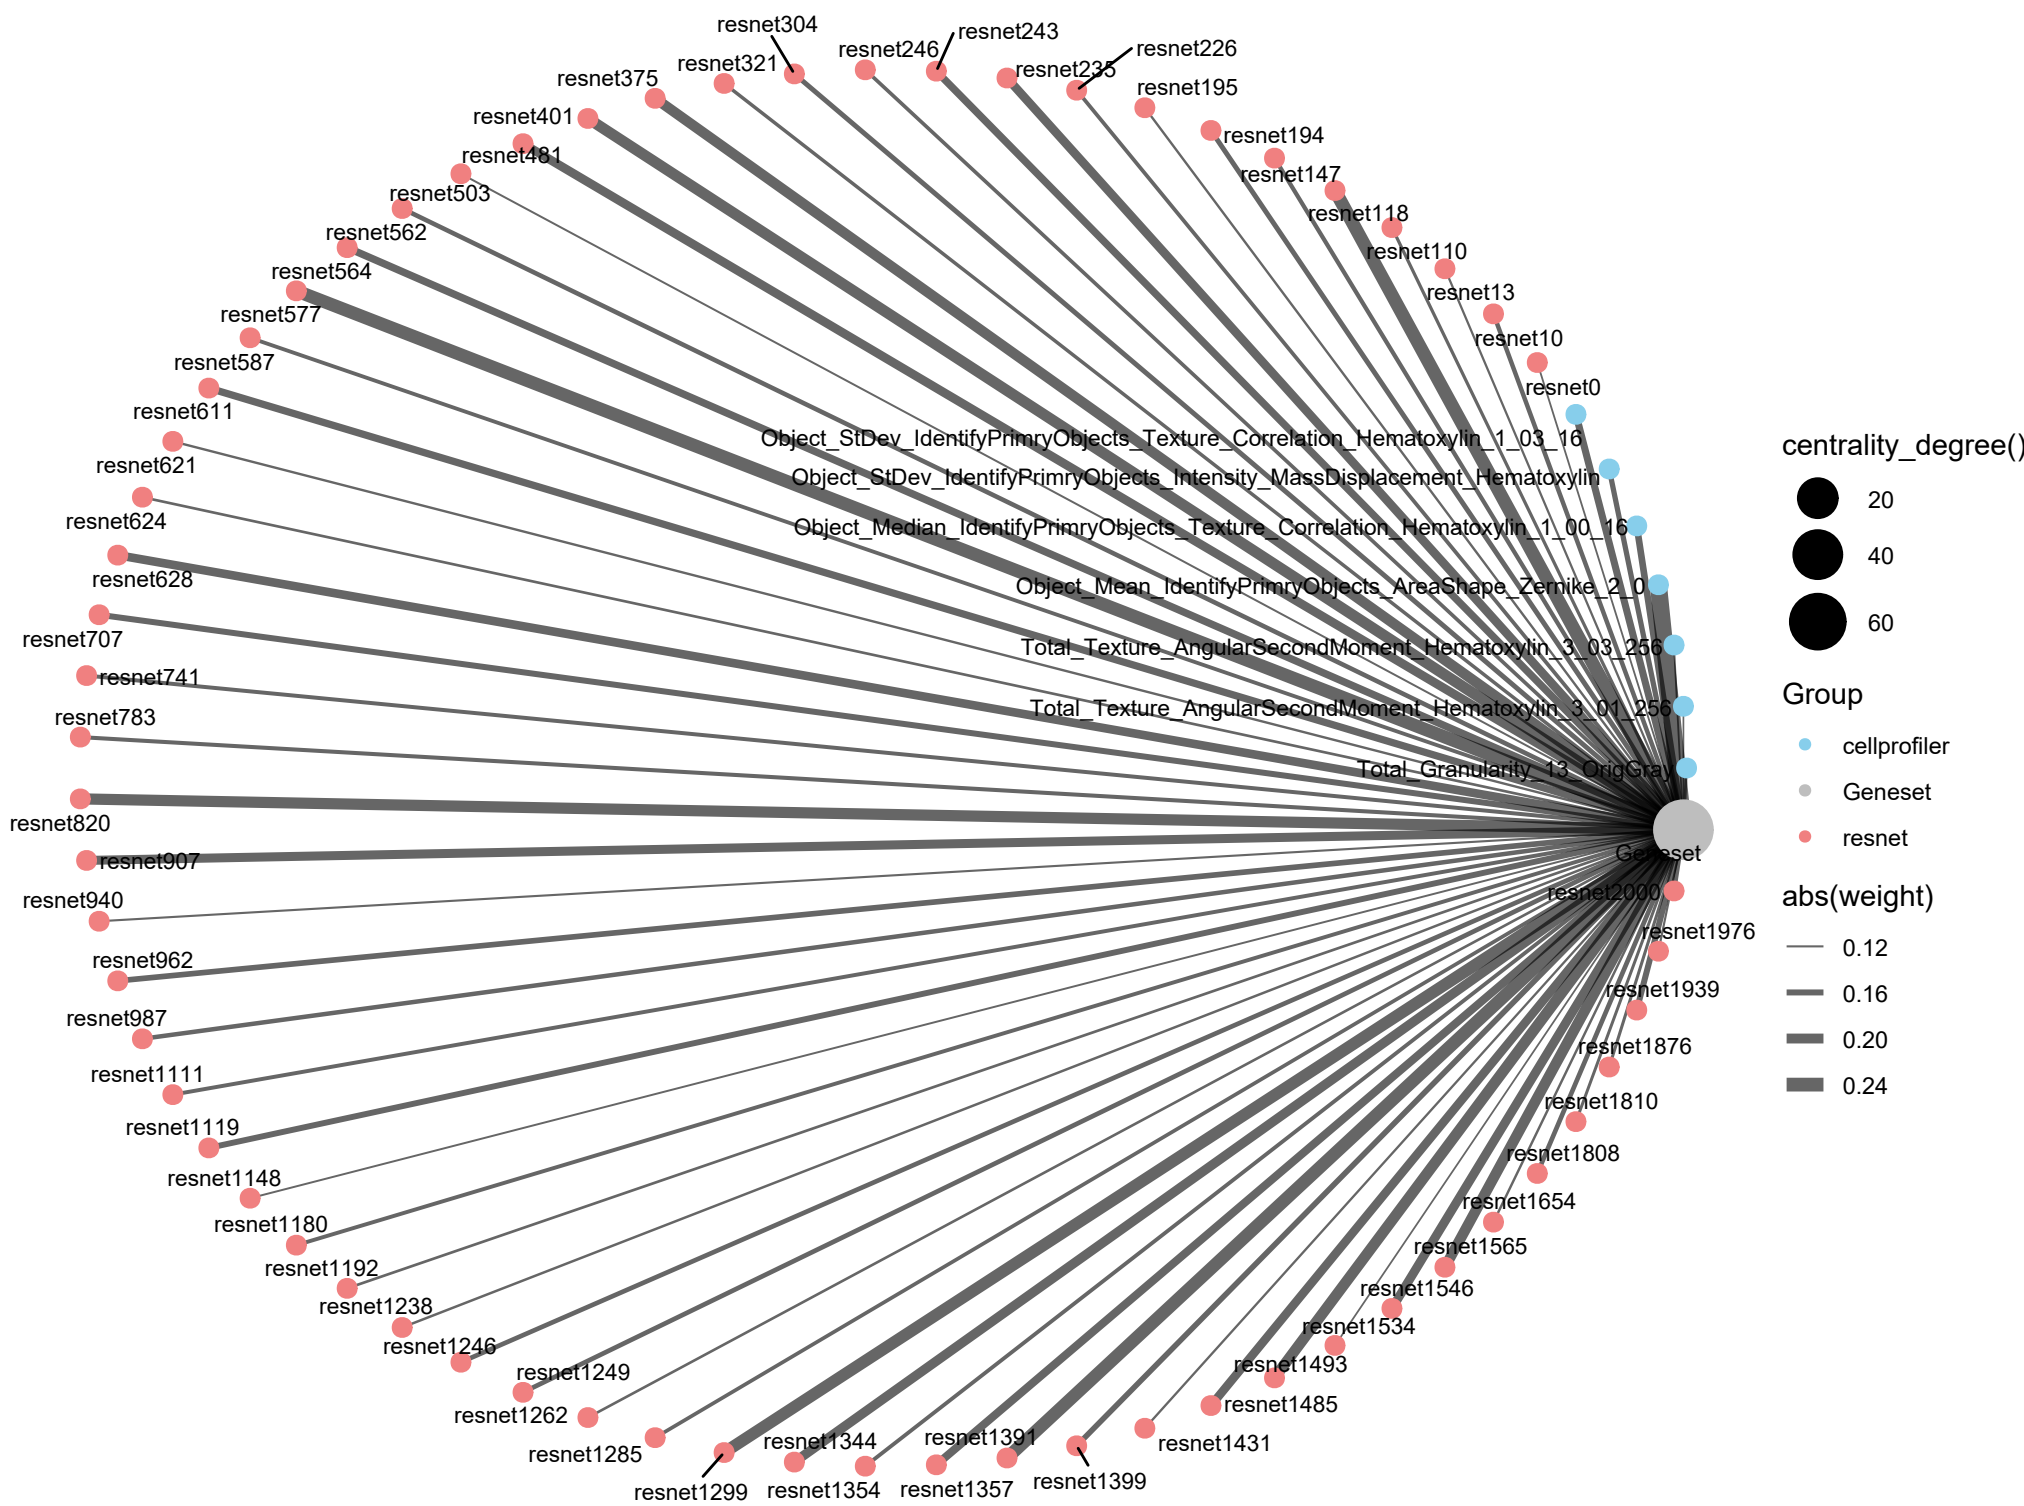

Supplement: Supplementary file 2 [file ffd359842cdd54b6bd684ebd.pdf]
